# Supplementary material for: The cascade catalysis of the porphyrinic zirconium metal–organic framework PCN-224-Cu for CO2conversion to alcohols
Source: Royal Society of Chemistry journal article supplement (doi:10.1039/d1ta06950k), 2021-01-01
Supplement: d1ta06950k1.pdf [file d1ta06950k1.pdf]

***Supporting Information***

**The cascade catalysis of the porphyrinic zirconium metal-organic framework PCN-224-Cu for CO<sub>2</sub> conversion to alcohols**

Shi-Chao Qi, Zhi-Hui Yang, Rong-Rong Zhu, Xiao-Jie Lu, Ding-Ming Xue, Xiao-Qin Liu and Lin-Bing Sun\*

*State Key Laboratory of Materials-Oriented Chemical Engineering, Jiangsu National Synergetic Innovation Center for Advanced Materials (SICAM), College of Chemical Engineering, Nanjing Tech University, 211816, Nanjing, China. E-mail: lbsun@njtech.edu.cn*

**Table S1.** The energies (in Hartree) of the Zr<sub>6</sub> cluster or TCPP-Cu site chemisorbing intermediates in a Zr<sub>6</sub>O<sub>8</sub>(TCPP-Cu)<sub>6</sub> unit calculated with PM7 semi-empirical method.

| Intermediate       | Site            | Energy | Geometry                                                                            | Site    | Energy | Geometry                                                                              |
|--------------------|-----------------|--------|-------------------------------------------------------------------------------------|---------|--------|---------------------------------------------------------------------------------------|
| CO                 | Zr <sub>6</sub> | 1.3120 | 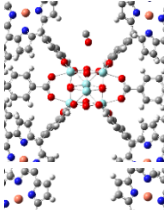   | TCPP-Cu | 1.2796 |    |
| CH <sub>3</sub> OH | Zr <sub>6</sub> | 1.2126 |   | TCPP-Cu | 1.2543 |   |
| CH <sub>3</sub>    | Zr <sub>6</sub> | 1.4101 |  | TCPP-Cu | 1.3717 |  |
| CH <sub>2</sub>    | Zr <sub>6</sub> | 1.4712 |  | TCPP-Cu | 1.4360 |  |
| OH                 | Zr <sub>6</sub> | 1.3178 |  | TCPP-Cu | 1.3103 |  |

**Table S2.** The yield and selectivity of CO<sub>2</sub> hydrogenation to alcohols based on recently reported representative catalysts.

| Entry | Catalyst                                                        | P/MPa | T/°C | Yield/mmol h <sup>-1</sup> g <sup>-1</sup> |      | Selectivity/% |      | Ref.      |
|-------|-----------------------------------------------------------------|-------|------|--------------------------------------------|------|---------------|------|-----------|
|       |                                                                 |       |      | EtOH                                       | MeOH | EtOH          | MeOH |           |
| 1     | PCN-224-Cu                                                      | 2     | 130  | 4.53                                       | --   | ~100          |      | This work |
| 2     | Cu <sup>II</sup> @Ru-UiO                                        | 2     | 150  | 0.29                                       | --   | >99           | <1   | [34]      |
| 3     | Zr <sub>12</sub> -bpdc-CuLi                                     | 2     | 100  | 3.62                                       | --   | 66.3          | 33.7 | [38]      |
| 4     | Cu NPs@Zr <sub>12</sub> -bpdc-Li                                | 2     | 100  | 0.09                                       | --   | 10.1          | 89.9 | [38]      |
| 5     | Cu <sup>I</sup> @Zr <sub>12</sub> -bpdc                         | 2     | 100  | 0.01                                       | --   | 11.3          | 88.7 | [38]      |
| 6     | Cu/ZrO <sub>2</sub>                                             | 2     | 100  | 0.04                                       | --   | 10.5          | 89.5 | [38]      |
| 7     | CoAlO <sub>x</sub>                                              | 4     | 140  | 0.44                                       | 0.02 | 92.1          | --   | [44]      |
| 8     | Cu/Na-Beta                                                      | 1.3   | 300  | 1.40                                       | --   | 64.3          | 30.1 | [45]      |
| 9     | Cu@Na-ZSM5                                                      | 1.3   | 300  | 1.85                                       | --   | 85            | 8.2  | [45]      |
| 10    | Cu@Na-Beta                                                      | 1.3   | 300  | 2.17                                       | --   | --            | ~100 | [45]      |
| 11    | UiO-66(Zr)                                                      | 1.8   | 200  | --                                         | 0.28 | --            | 3.5  | [46]      |
| 12    | UiO-66(Ce/Zr)                                                   | 1.8   | 200  | --                                         | 0.47 | --            | 28.7 | [46]      |
| 13    | Pt <sub>2</sub> Ru <sub>1</sub> /Fe <sub>2</sub> O <sub>3</sub> | 18    | 200  | 2.6                                        | --   | 11.8          | 18.9 | [47]      |
| 14    | Pt <sub>1</sub> Ru <sub>2</sub> /Fe <sub>2</sub> O <sub>3</sub> | 18    | 220  | 3.2                                        | --   | 28.4          | 5.9  | [47]      |

**Table S3.** Ultimate elemental analysis (% wt.) for as-synthesized PCN-224-Cu and that after reusage.

| <b>Element</b> | <b>Theoretical</b> | <b>As-synthesized</b> | <b>After reusage</b> |
|----------------|--------------------|-----------------------|----------------------|
| C              | 40.4               | 46.7                  | 49.8                 |
| H              | 1.7                | 2.9                   | 3.0                  |
| N              | 3.9                | 3.5                   | 3.5                  |
| O              | 23.9               | 20.7                  | 20.0                 |
| Zr             | 25.6               | 21.8                  | 19.5                 |
| Cu             | 4.5                | 4.4                   | 4.2                  |

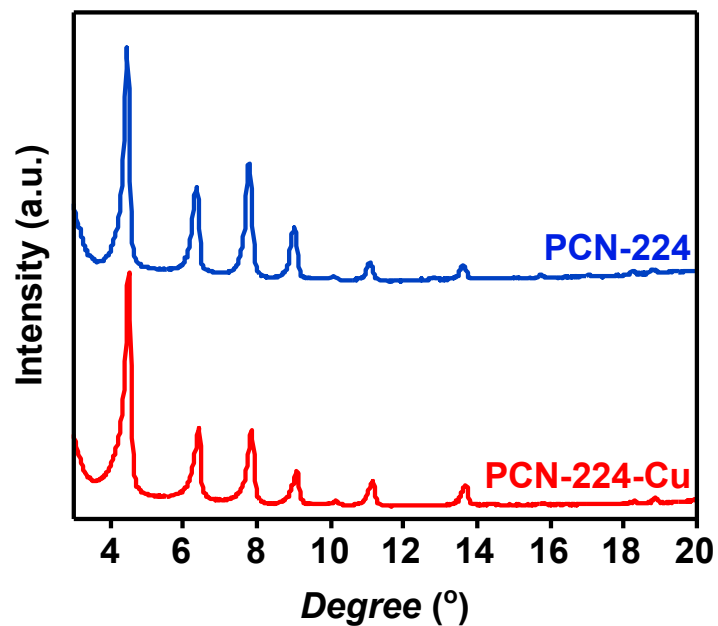

Fig. S1. XRPD patterns of PCN-224 and PCN-224-Cu.

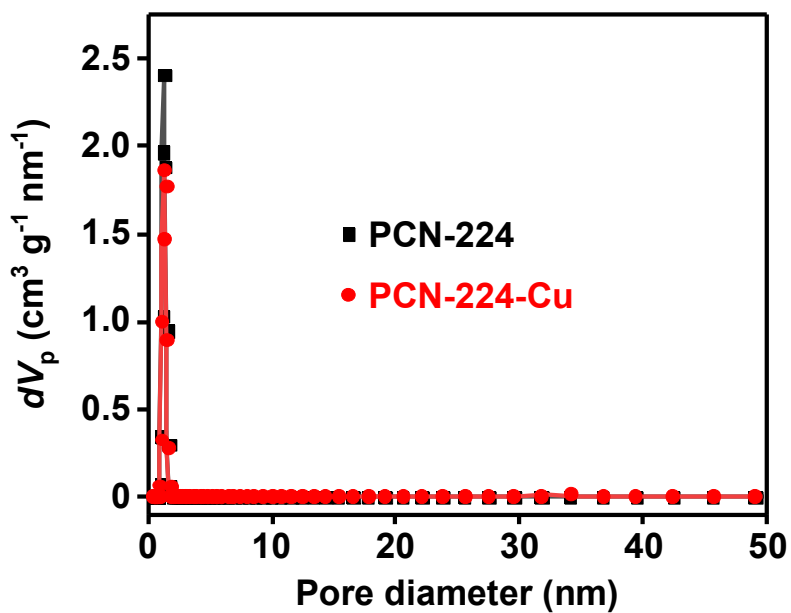

Fig. S2. Pore diameter distributions of PCN-224 and PCN-224-Cu.

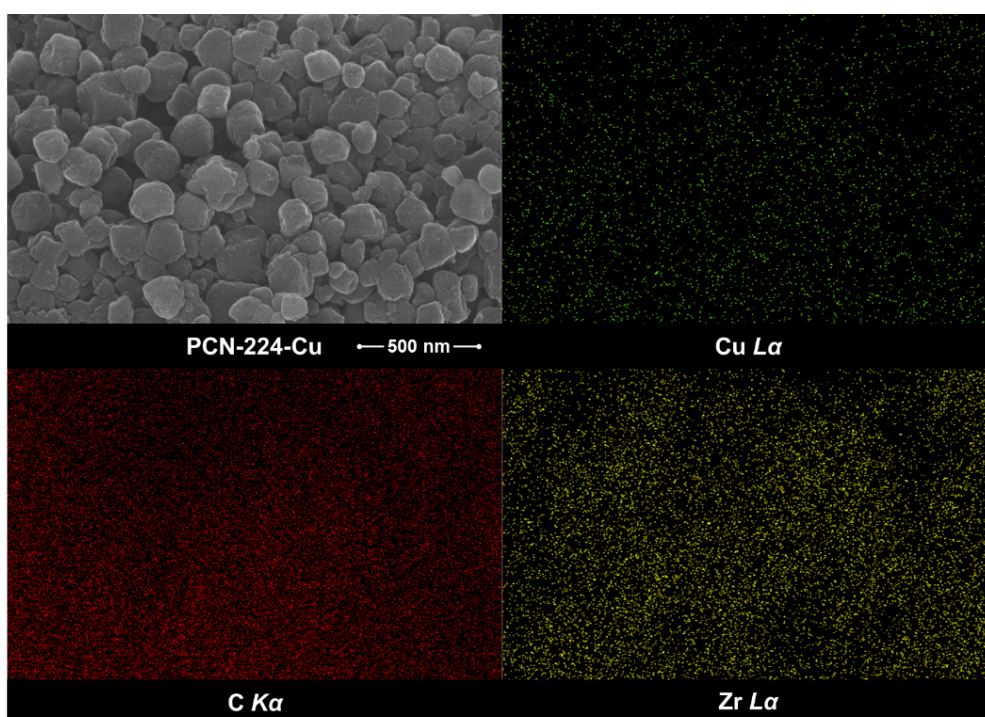

**Fig. S3.** Elemental mapping of Cu, C, and Zr for PCN-224-Cu.

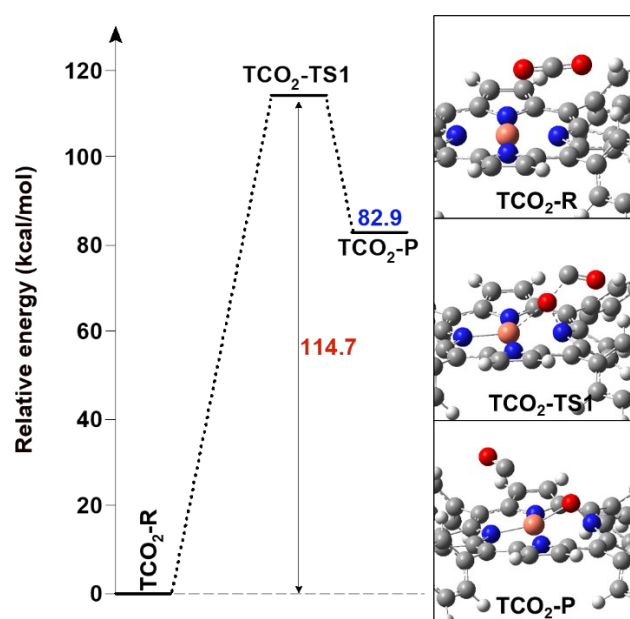

**Fig. S4.** Energy profile of CO<sub>2</sub> dissociation to CO over TCPP-Cu unit.

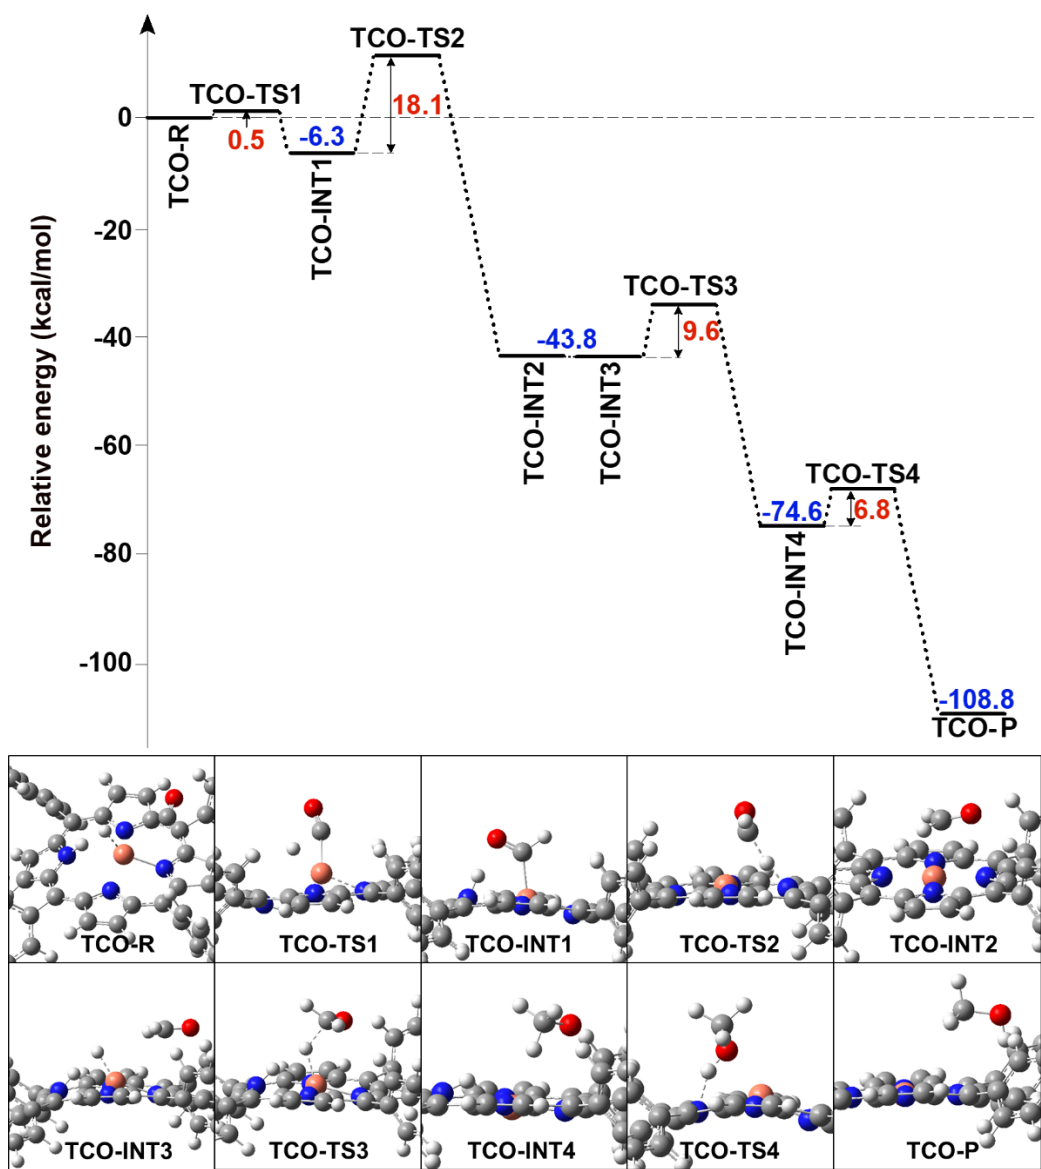

Fig. S5. Energy profile of CO hydrogenation to methanol over TCPP-Cu unit.



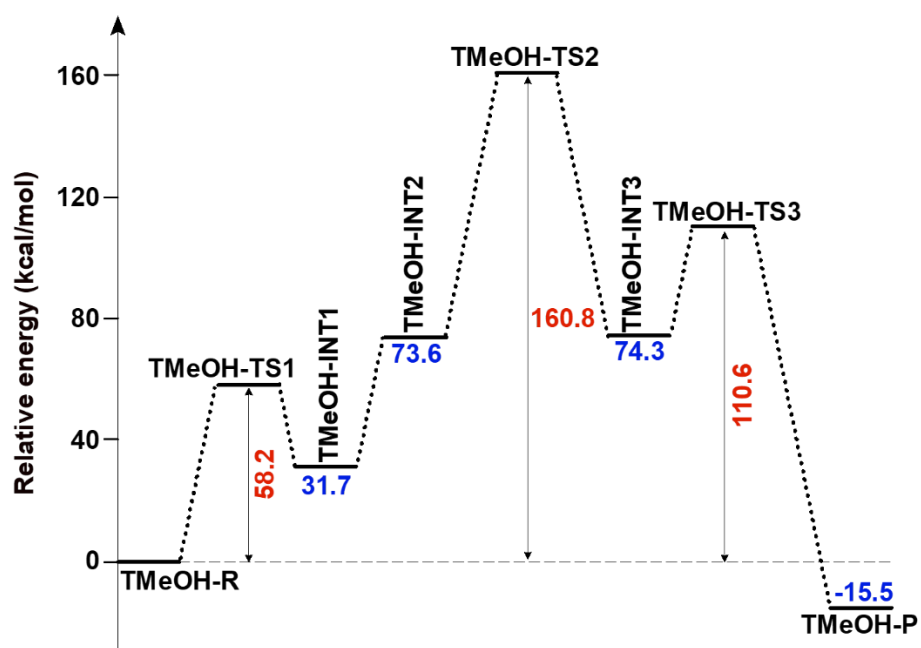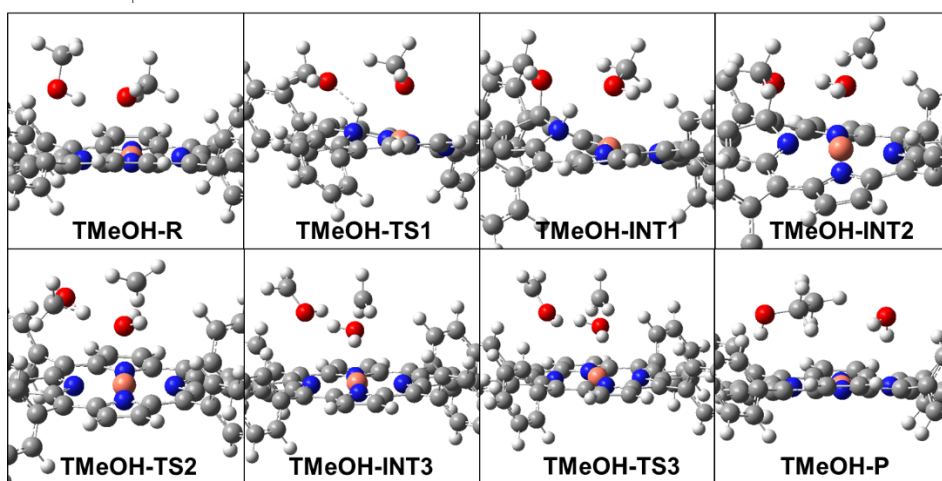

**Fig. S6.** Energy profile of methanol conversion to ethanol over TCPP-Cu unit.

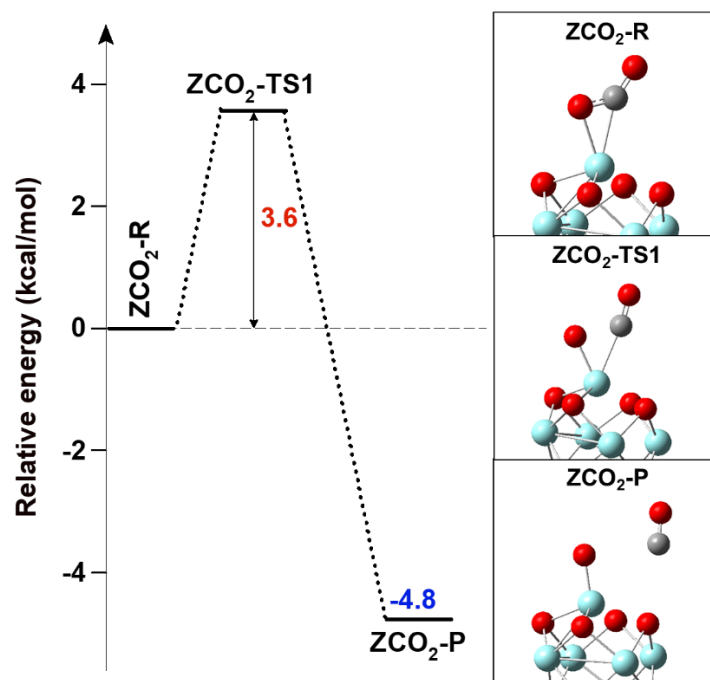

**Fig. S7.** Energy profile of CO<sub>2</sub> dissociation to CO over Zr<sub>6</sub> cluster.

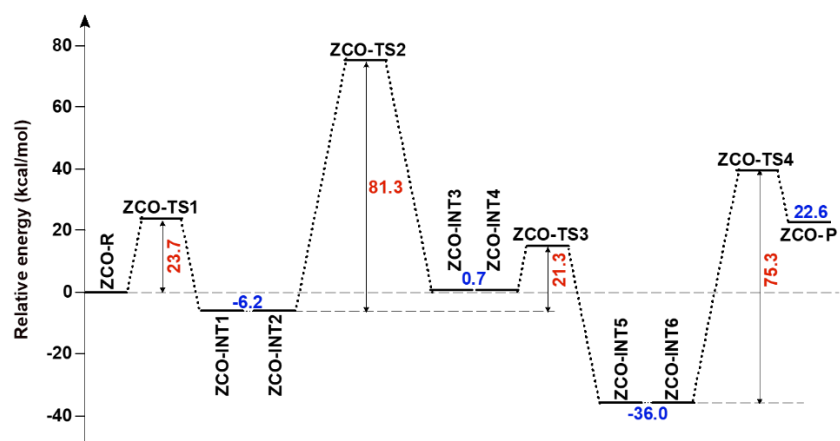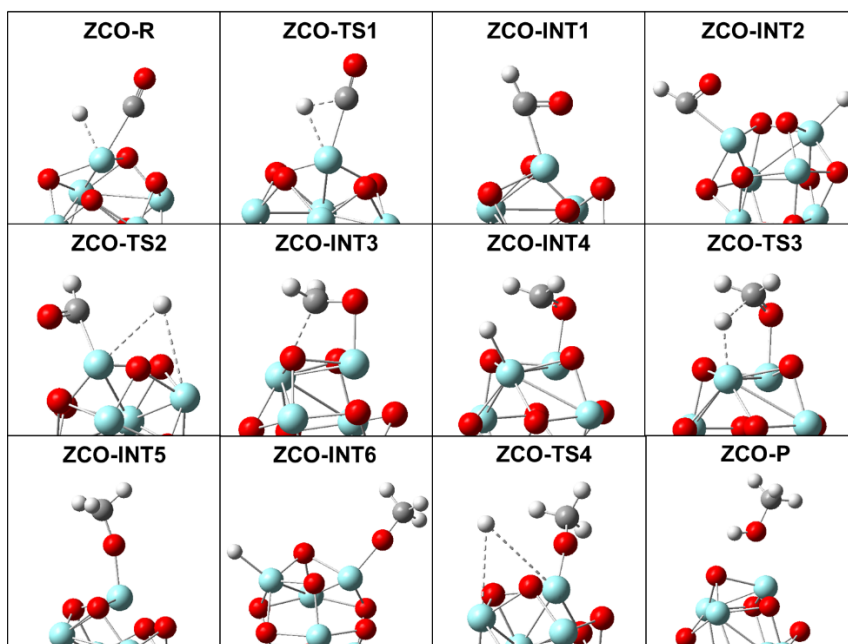

**Fig. S8.** Energy profile of CO hydrogenation to methanol over Zr<sub>6</sub> cluster.

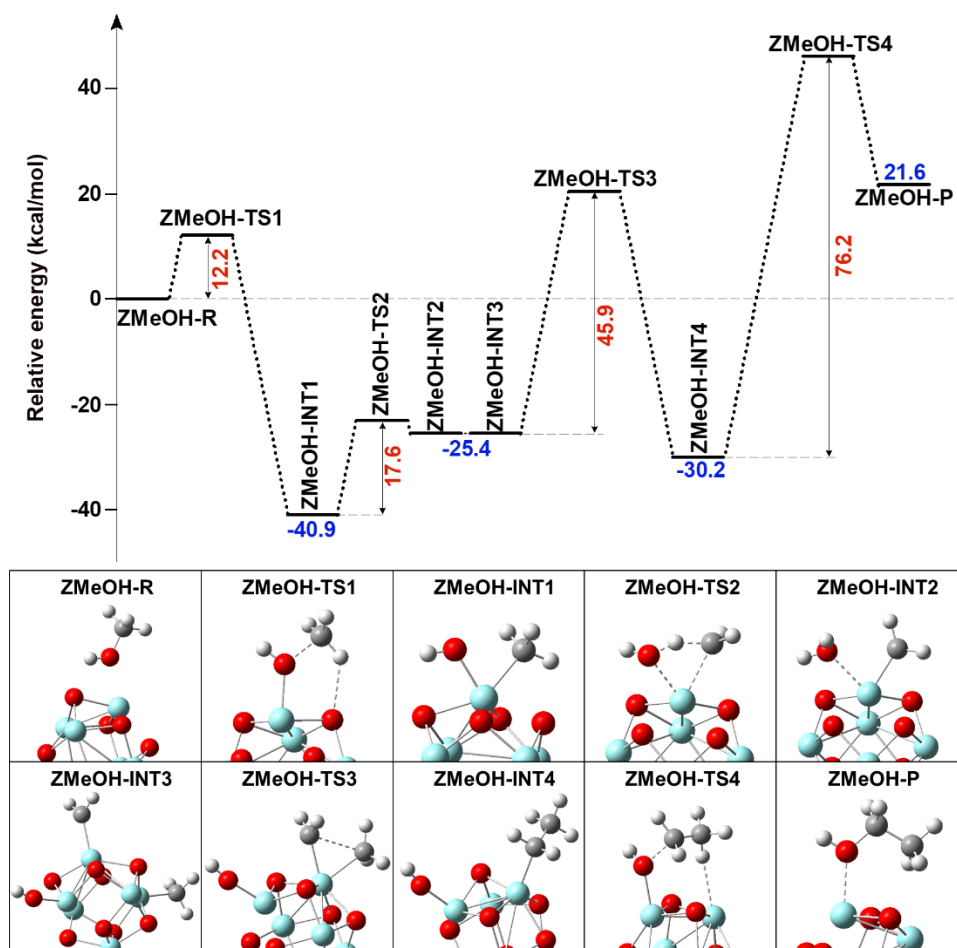

**Fig. S9.** Energy profile of methanol dissociation and re-bonding to ethanol over  $Zr_6$  cluster.

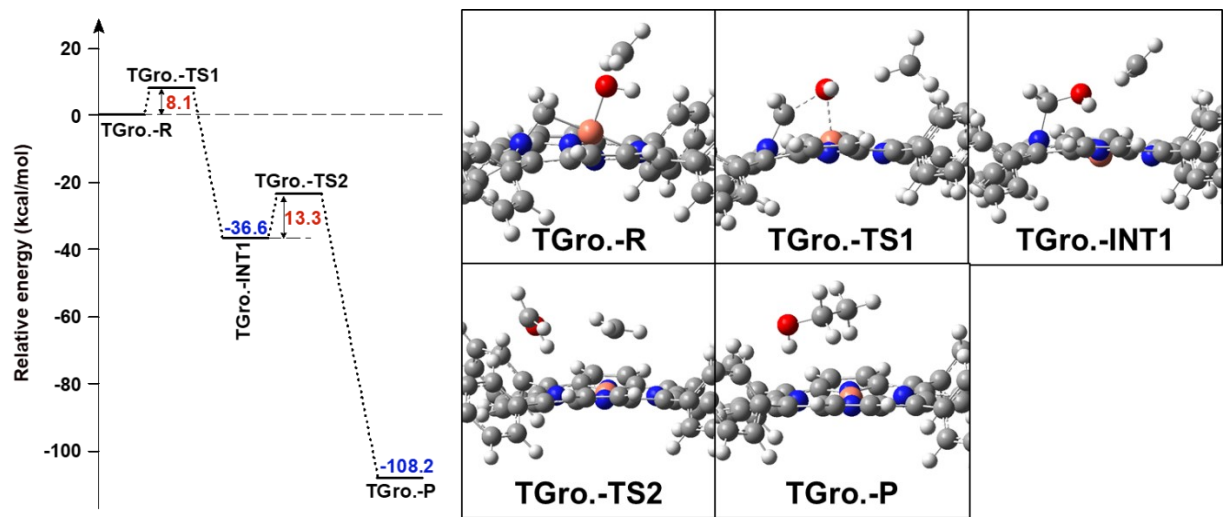

**Fig. S10.** Energy profile of \*CH<sub>3</sub>, \*CH<sub>2</sub>, and \*OH groups bonding to ethanol over TCPP-Cu unit.

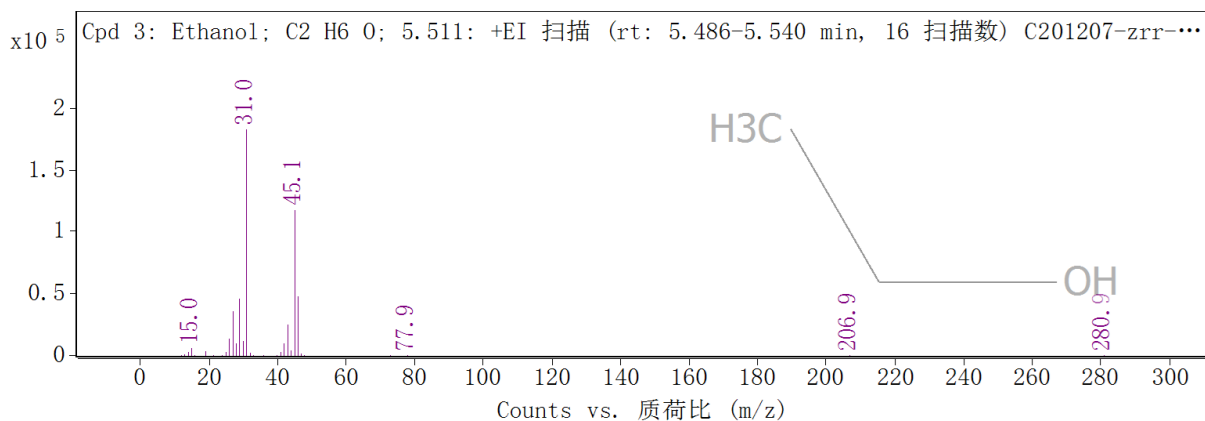

**Fig. S11.** MS spectrum of ethanol after catalytic CO<sub>2</sub> hydrogenation (Matching 99.7%).

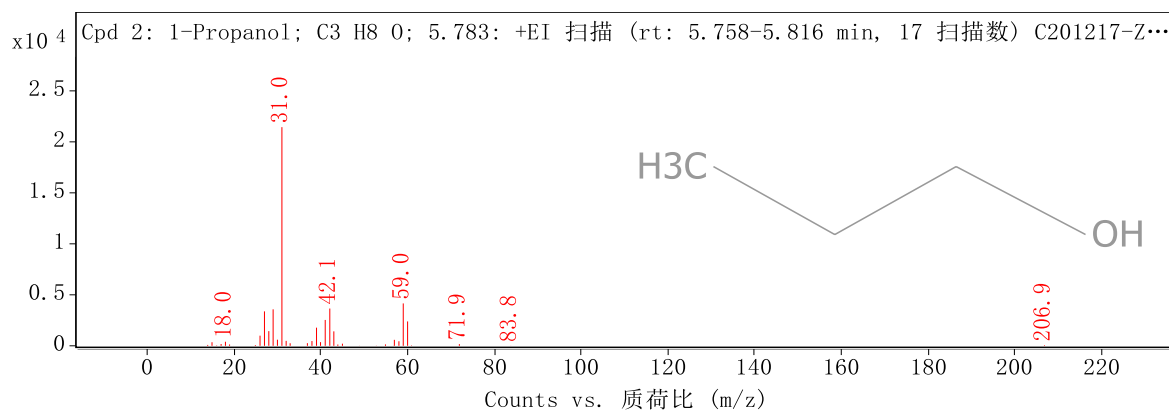

**Fig. S12.** MS spectrum of *n*-propanol after catalytic methanol conversion (Matching 97.3%).

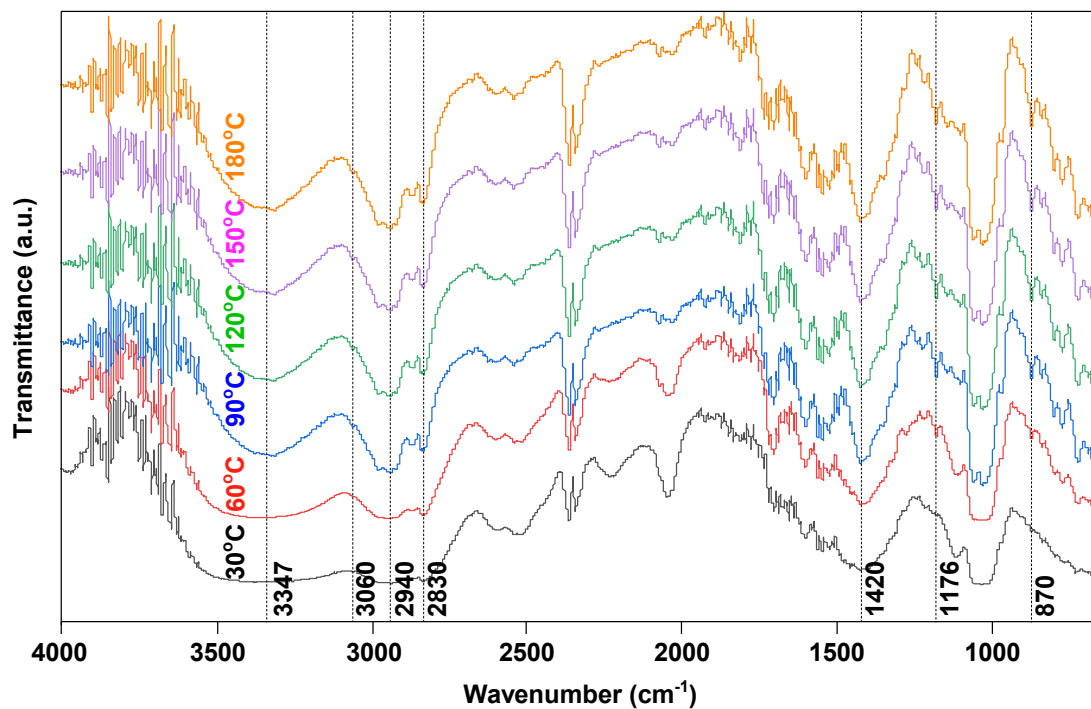

Fig. S13. In-situ DRIFTS for methanol dissociation catalyzed by PCN-224.

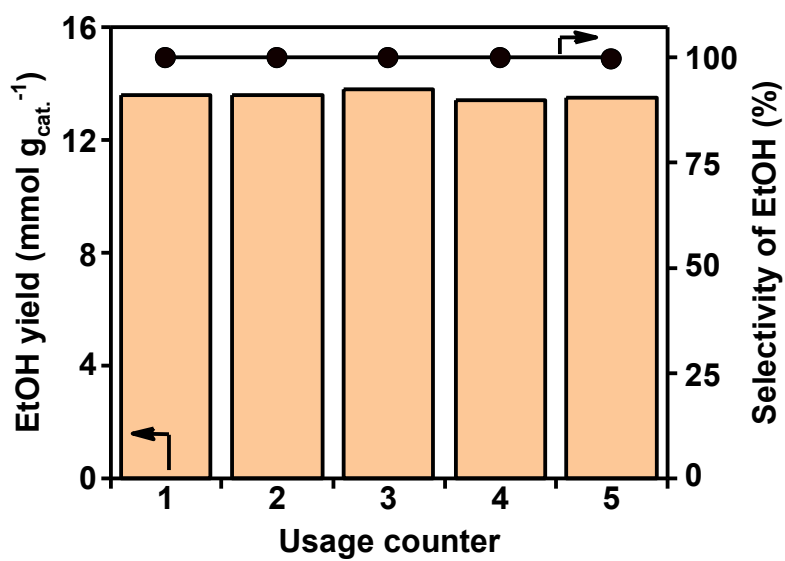

Fig. S14. Reusability test of PCN-224-Cu for CO<sub>2</sub> hydrogenation (403 K, 3h).

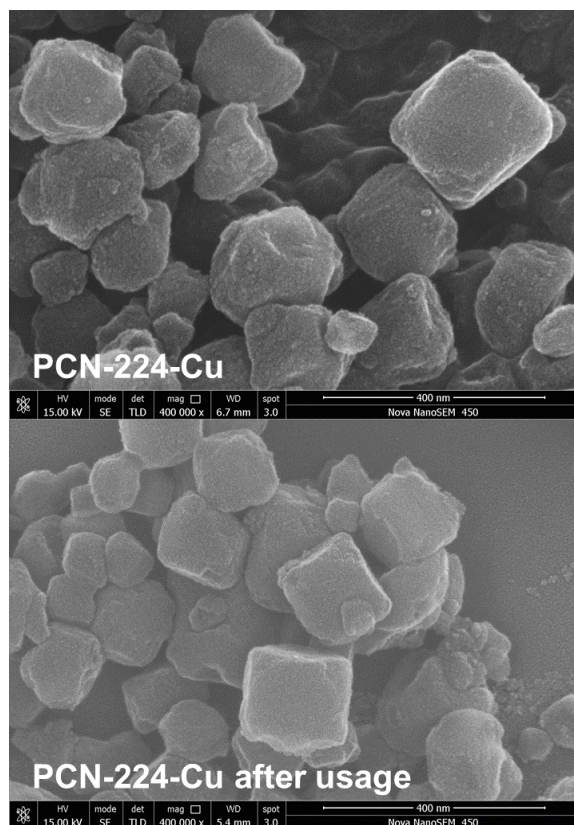

Fig. S15. SEM images of PCN-224-Cu before and after usage.

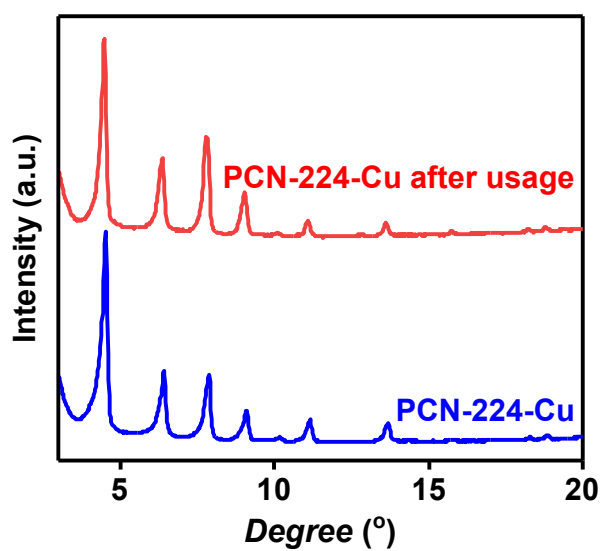

Fig. S16. XRPD patterns of PCN-224-Cu before and after usage.



## Atomic coordinates of optimized geometries and the imaginary frequencies of transition states

TCO<sub>2</sub>-R

-----  
Center Atomic Atomic Coordinates (Angstroms)

Number Number Type X Y Z  
-----

|    |    |   |           |           |           |
|----|----|---|-----------|-----------|-----------|
| 1  | 7  | 0 | -1.905348 | 0.000010  | -0.328831 |
| 2  | 7  | 0 | 0.118127  | 2.029637  | -0.207104 |
| 3  | 7  | 0 | 2.149672  | -0.000010 | -0.150585 |
| 4  | 7  | 0 | 0.118107  | -2.029636 | -0.207103 |
| 5  | 6  | 0 | -2.720348 | -1.102825 | -0.439744 |
| 6  | 6  | 0 | -4.080723 | -0.682117 | -0.687134 |
| 7  | 6  | 0 | -4.080715 | 0.682160  | -0.687130 |
| 8  | 6  | 0 | -2.720338 | 1.102855  | -0.439738 |
| 9  | 6  | 0 | -2.323292 | 2.439332  | -0.287833 |
| 10 | 6  | 0 | -0.987707 | 2.843691  | -0.141565 |
| 11 | 6  | 0 | -0.574823 | 4.212705  | 0.082374  |
| 12 | 6  | 0 | 0.788402  | 4.214143  | 0.119353  |
| 13 | 6  | 0 | 1.215900  | 2.844897  | -0.073364 |
| 14 | 6  | 0 | 2.559079  | 2.441568  | -0.115723 |
| 15 | 6  | 0 | 2.968420  | 1.102136  | -0.194897 |
| 16 | 6  | 0 | 4.348275  | 0.681790  | -0.316648 |
| 17 | 6  | 0 | 4.348268  | -0.681834 | -0.316645 |
| 18 | 6  | 0 | 2.968409  | -1.102165 | -0.194892 |
| 19 | 6  | 0 | 2.559054  | -2.441593 | -0.115714 |
| 20 | 6  | 0 | 1.215871  | -2.844906 | -0.073358 |
| 21 | 6  | 0 | 0.788359  | -4.214151 | 0.119357  |
| 22 | 6  | 0 | -0.574866 | -4.212697 | 0.082371  |
| 23 | 6  | 0 | -0.987737 | -2.843679 | -0.141569 |
| 24 | 6  | 0 | -2.323317 | -2.439307 | -0.287843 |
| 25 | 1  | 0 | -4.921692 | -1.350609 | -0.847154 |
| 26 | 1  | 0 | -4.921680 | 1.350662  | -0.847147 |
| 27 | 1  | 0 | -1.247728 | 5.056317  | 0.205862  |
| 28 | 1  | 0 | 1.451947  | 5.059009  | 0.279878  |
| 29 | 1  | 0 | 5.199746  | 1.350480  | -0.404387 |
| 30 | 1  | 0 | 5.199733  | -1.350534 | -0.404381 |
| 31 | 1  | 0 | 1.451893  | -5.059021 | 0.279885  |
| 32 | 1  | 0 | -1.247782 | -5.056304 | 0.205856  |
| 33 | 29 | 0 | 0.126162  | 0.000000  | -0.215997 |
| 34 | 6  | 0 | 3.612032  | 3.498407  | -0.066369 |
| 35 | 6  | 0 | 4.500811  | 3.575705  | 1.018628  |
| 36 | 6  | 0 | 3.733545  | 4.437663  | -1.103701 |

37 6 0 5.484314 4.565921 1.065626  
38 1 0 4.408274 2.854191 1.833110  
39 6 0 4.718206 5.426830 -1.058472  
40 1 0 3.050741 4.380800 -1.954073  
41 6 0 5.596549 5.494371 0.026763  
42 1 0 6.163463 4.615171 1.920270  
43 1 0 4.802371 6.145729 -1.877118  
44 1 0 6.366520 6.268744 0.062901  
45 6 0 3.611997 -3.498441 -0.066355  
46 6 0 3.733504 -4.437701 -1.103684  
47 6 0 4.500774 -3.575745 1.018644  
48 6 0 4.718156 -5.426878 -1.058450  
49 1 0 3.050702 -4.380835 -1.954058  
50 6 0 5.484266 -4.565969 1.065648  
51 1 0 4.408241 -2.854227 1.833123  
52 6 0 5.596495 -5.494423 0.026788  
53 1 0 4.802316 -6.145781 -1.877093  
54 1 0 6.163412 -4.615224 1.920294  
55 1 0 6.366458 -6.268804 0.062931  
56 6 0 -3.389288 3.482803 -0.254807  
57 6 0 -4.341351 3.485601 0.778696  
58 6 0 -3.465164 4.475923 -1.244656  
59 6 0 -5.341665 4.458685 0.822298  
60 1 0 -4.284671 2.716805 1.552562  
61 6 0 -4.467217 5.447836 -1.202506  
62 1 0 -2.734262 4.474881 -2.056044  
63 6 0 -5.407708 5.442794 -0.168416  
64 1 0 -6.070991 4.450170 1.635969  
65 1 0 -4.516386 6.210054 -1.983974  
66 1 0 -6.191086 6.203752 -0.135200  
67 6 0 -3.389321 -3.482769 -0.254823  
68 6 0 -4.341388 -3.485560 0.778676  
69 6 0 -3.465204 -4.475884 -1.244676  
70 6 0 -5.341712 -4.458637 0.822271  
71 1 0 -4.284704 -2.716769 1.552545  
72 6 0 -4.467266 -5.447788 -1.202533  
73 1 0 -2.734299 -4.474845 -2.056062  
74 6 0 -5.407760 -5.442741 -0.168447  
75 1 0 -6.071041 -4.450117 1.635940  
76 1 0 -4.516440 -6.210002 -1.984004  
77 1 0 -6.191146 -6.203691 -0.135236  
78 6 0 -1.777331 -0.000003 2.595311  
79 8 0 -0.614365 -0.000005 2.559177  
80 8 0 -2.938283 0.000001 2.664246

TCO<sub>2</sub>-TS1

-----  
Center Atomic Atomic Coordinates (Angstroms)

Number Number Type X Y Z  
-----

|    |    |   |           |           |           |
|----|----|---|-----------|-----------|-----------|
| 1  | 7  | 0 | -2.243483 | 0.000019  | -0.097616 |
| 2  | 7  | 0 | -0.159549 | 2.005469  | -0.078957 |
| 3  | 7  | 0 | 2.002330  | -0.000018 | -0.058101 |
| 4  | 7  | 0 | -0.159584 | -2.005470 | -0.078955 |
| 5  | 6  | 0 | -3.043228 | -1.106885 | -0.192696 |
| 6  | 6  | 0 | -4.413405 | -0.682838 | -0.405004 |
| 7  | 6  | 0 | -4.413392 | 0.682913  | -0.405006 |
| 8  | 6  | 0 | -3.043209 | 1.106935  | -0.192699 |
| 9  | 6  | 0 | -2.608085 | 2.437183  | -0.068010 |
| 10 | 6  | 0 | -1.256245 | 2.820408  | 0.057304  |
| 11 | 6  | 0 | -0.824132 | 4.172248  | 0.342361  |
| 12 | 6  | 0 | 0.539966  | 4.160027  | 0.349568  |
| 13 | 6  | 0 | 0.957705  | 2.805747  | 0.055077  |
| 14 | 6  | 0 | 2.303016  | 2.441812  | -0.167419 |
| 15 | 6  | 0 | 2.740775  | 1.131110  | -0.395349 |
| 16 | 6  | 0 | 3.926658  | 0.688699  | -1.060108 |
| 17 | 6  | 0 | 3.926645  | -0.688770 | -1.060107 |
| 18 | 6  | 0 | 2.740756  | -1.131159 | -0.395348 |
| 19 | 6  | 0 | 2.302973  | -2.441855 | -0.167418 |
| 20 | 6  | 0 | 0.957656  | -2.805767 | 0.055077  |
| 21 | 6  | 0 | 0.539893  | -4.160041 | 0.349568  |
| 22 | 6  | 0 | -0.824205 | -4.172236 | 0.342362  |
| 23 | 6  | 0 | -1.256293 | -2.820390 | 0.057307  |
| 24 | 6  | 0 | -2.608129 | -2.437139 | -0.068006 |
| 25 | 1  | 0 | -5.259493 | -1.349125 | -0.548129 |
| 26 | 1  | 0 | -5.259470 | 1.349213  | -0.548134 |
| 27 | 1  | 0 | -1.484440 | 5.013181  | 0.533452  |
| 28 | 1  | 0 | 1.211125  | 4.989946  | 0.550083  |
| 29 | 1  | 0 | 4.652905  | 1.352055  | -1.522563 |
| 30 | 1  | 0 | 4.652882  | -1.352138 | -1.522562 |
| 31 | 1  | 0 | 1.211039  | -4.989970 | 0.550081  |
| 32 | 1  | 0 | -1.484527 | -5.013159 | 0.533453  |
| 33 | 29 | 0 | -0.279943 | -0.000001 | 0.008727  |
| 34 | 6  | 0 | 3.358914  | 3.488145  | -0.205963 |
| 35 | 6  | 0 | 4.485254  | 3.350753  | 0.626599  |
| 36 | 6  | 0 | 3.281987  | 4.595403  | -1.068340 |
| 37 | 6  | 0 | 5.500576  | 4.308099  | 0.605879  |

38 1 0 4.542364 2.491855 1.299270  
39 6 0 4.302309 5.547664 -1.091081  
40 1 0 2.423513 4.695128 -1.735380  
41 6 0 5.412162 5.408628 -0.251917  
42 1 0 6.363606 4.195423 1.266313  
43 1 0 4.234184 6.398962 -1.772690  
44 1 0 6.208835 6.156225 -0.269204  
45 6 0 3.358854 -3.488205 -0.205964  
46 6 0 3.281904 -4.595463 -1.068338  
47 6 0 4.485199 -3.350833 0.626594  
48 6 0 4.302210 -5.547743 -1.091082  
49 1 0 2.423428 -4.695176 -1.735376  
50 6 0 5.500504 -4.308196 0.605872  
51 1 0 4.542325 -2.491933 1.299264  
52 6 0 5.412068 -5.408725 -0.251922  
53 1 0 4.234067 -6.399041 -1.772689  
54 1 0 6.363538 -4.195532 1.266304  
55 1 0 6.208728 -6.156336 -0.269209  
56 6 0 -3.643224 3.510685 -0.054370  
57 6 0 -4.623066 3.549922 0.951975  
58 6 0 -3.659300 4.503546 -1.048598  
59 6 0 -5.592113 4.555109 0.964156  
60 1 0 -4.611087 2.789677 1.735683  
61 6 0 -4.630180 5.506757 -1.038424  
62 1 0 -2.906057 4.476645 -1.838748  
63 6 0 -5.599419 5.536018 -0.031573  
64 1 0 -6.341755 4.575254 1.758839  
65 1 0 -4.632188 6.267005 -1.823253  
66 1 0 -6.358219 6.322043 -0.022501  
67 6 0 -3.643286 -3.510624 -0.054365  
68 6 0 -4.623124 -3.549845 0.951985  
69 6 0 -3.659386 -4.503481 -1.048595  
70 6 0 -5.592190 -4.555015 0.964168  
71 1 0 -4.611128 -2.789602 1.735695  
72 6 0 -4.630283 -5.506674 -1.038420  
73 1 0 -2.906146 -4.476592 -1.838749  
74 6 0 -5.599517 -5.535921 -0.031564  
75 1 0 -6.341828 -4.575148 1.758854  
76 1 0 -4.632309 -6.266919 -1.823251  
77 1 0 -6.358332 -6.321931 -0.022491  
78 6 0 2.329860 -0.000003 2.548094  
79 8 0 1.389813 -0.000011 1.334922  
80 8 0 3.482711 0.000012 2.282877

\*\*\*\*\* 1 imaginary frequencies (negative Signs) \*\*\*\*\*

Diagonal vibrational polarizability:

31.5059342 142.6261153 50.3692083

Harmonic frequencies (cm<sup>-1</sup>), IR intensities (KM/Mole), Raman scattering activities (A<sup>4</sup>/AMU), depolarization ratios for plane and unpolarized incident light, reduced masses (AMU), force constants (mDyne/A), and normal coordinates:

1 2 3

A A A

Frequencies -- -745.4710 13.4878 21.5548

Red. masses -- 13.9958 6.1569 12.5946

Frc consts -- 4.5826 0.0007 0.0034

IR Inten -- 37.4468 0.0176 2.1535

Atom AN X Y Z X Y Z X Y Z

|    |   |       |       |       |       |       |       |       |       |       |
|----|---|-------|-------|-------|-------|-------|-------|-------|-------|-------|
| 1  | 7 | 0.00  | -0.00 | 0.02  | 0.00  | 0.00  | -0.00 | 0.00  | -0.01 | 0.00  |
| 2  | 7 | 0.00  | -0.00 | 0.01  | 0.00  | 0.00  | -0.01 | 0.00  | -0.02 | -0.02 |
| 3  | 7 | -0.09 | 0.00  | -0.29 | 0.00  | -0.01 | 0.00  | 0.00  | -0.02 | 0.00  |
| 4  | 7 | 0.00  | 0.00  | 0.01  | -0.00 | 0.00  | 0.01  | -0.00 | -0.02 | 0.02  |
| 5  | 6 | 0.00  | -0.00 | 0.00  | -0.00 | 0.01  | -0.02 | -0.00 | -0.01 | 0.00  |
| 6  | 6 | 0.00  | -0.00 | -0.00 | -0.00 | 0.01  | -0.02 | -0.00 | -0.01 | -0.00 |
| 7  | 6 | 0.00  | 0.00  | -0.00 | 0.00  | 0.01  | 0.02  | 0.00  | -0.01 | 0.00  |
| 8  | 6 | 0.00  | 0.00  | 0.00  | 0.00  | 0.01  | 0.02  | 0.00  | -0.01 | -0.00 |
| 9  | 6 | -0.00 | 0.00  | 0.00  | 0.00  | 0.00  | 0.04  | 0.00  | -0.01 | -0.00 |
| 10 | 6 | -0.00 | -0.00 | 0.00  | 0.01  | 0.00  | 0.02  | 0.00  | -0.01 | -0.02 |
| 11 | 6 | 0.00  | -0.00 | -0.00 | 0.02  | 0.00  | 0.01  | 0.01  | -0.01 | -0.03 |
| 12 | 6 | 0.00  | -0.00 | 0.00  | 0.02  | -0.00 | -0.02 | 0.01  | -0.01 | -0.03 |
| 13 | 6 | 0.00  | 0.00  | -0.00 | 0.01  | -0.00 | -0.03 | 0.00  | -0.02 | -0.03 |
| 14 | 6 | -0.00 | -0.01 | -0.02 | 0.00  | -0.01 | -0.05 | 0.00  | -0.02 | -0.02 |
| 15 | 6 | -0.01 | -0.02 | -0.04 | -0.00 | -0.01 | -0.02 | -0.00 | -0.03 | -0.01 |
| 16 | 6 | 0.04  | -0.00 | 0.00  | -0.00 | -0.03 | -0.02 | -0.00 | -0.03 | -0.01 |
| 17 | 6 | 0.04  | 0.00  | 0.00  | 0.00  | -0.03 | 0.02  | 0.00  | -0.03 | 0.01  |
| 18 | 6 | -0.01 | 0.02  | -0.04 | 0.00  | -0.01 | 0.02  | 0.00  | -0.03 | 0.01  |
| 19 | 6 | -0.00 | 0.01  | -0.02 | -0.00 | -0.01 | 0.05  | -0.00 | -0.02 | 0.02  |
| 20 | 6 | 0.00  | -0.00 | -0.00 | -0.01 | -0.00 | 0.03  | -0.00 | -0.02 | 0.03  |
| 21 | 6 | 0.00  | 0.00  | 0.00  | -0.02 | -0.00 | 0.02  | -0.01 | -0.01 | 0.03  |
| 22 | 6 | 0.00  | 0.00  | -0.00 | -0.02 | 0.00  | -0.01 | -0.01 | -0.01 | 0.03  |
| 23 | 6 | -0.00 | 0.00  | 0.00  | -0.01 | 0.00  | -0.02 | -0.00 | -0.01 | 0.02  |
| 24 | 6 | -0.00 | -0.00 | 0.00  | -0.00 | 0.00  | -0.04 | -0.00 | -0.01 | 0.00  |
| 25 | 1 | 0.01  | -0.00 | -0.01 | -0.00 | 0.02  | -0.03 | -0.00 | -0.01 | -0.00 |
| 26 | 1 | 0.01  | 0.00  | -0.01 | 0.00  | 0.02  | 0.03  | 0.00  | -0.01 | 0.00  |
| 27 | 1 | 0.00  | -0.00 | -0.01 | 0.02  | 0.00  | 0.03  | 0.01  | -0.01 | -0.03 |
| 28 | 1 | 0.00  | -0.00 | -0.00 | 0.02  | -0.00 | -0.04 | 0.01  | -0.02 | -0.04 |
| 29 | 1 | 0.08  | 0.00  | 0.08  | -0.00 | -0.04 | -0.03 | -0.01 | -0.03 | -0.02 |
| 30 | 1 | 0.08  | -0.00 | 0.08  | 0.00  | -0.04 | 0.03  | 0.01  | -0.03 | 0.02  |

31 1 0.00 0.00 -0.00 -0.02 -0.00 0.04 -0.01 -0.02 0.04  
32 1 0.00 0.00 -0.01 -0.02 0.00 -0.03 -0.01 -0.01 0.03  
33 29 0.02 0.00 -0.02 0.00 0.00 -0.00 0.00 -0.02 0.00  
34 6 -0.00 -0.00 0.00 -0.00 -0.01 -0.09 0.02 -0.03 0.01  
35 6 -0.00 -0.00 0.00 0.02 0.02 -0.10 -0.01 -0.07 0.03  
36 6 0.00 -0.00 0.00 -0.02 -0.02 -0.11 0.05 -0.02 0.02  
37 6 -0.00 -0.00 0.00 0.01 0.02 -0.15 0.01 -0.08 0.07  
38 1 0.00 -0.00 -0.00 0.03 0.03 -0.09 -0.04 -0.08 0.02  
39 6 -0.00 -0.00 0.00 -0.02 -0.02 -0.15 0.06 -0.03 0.06  
40 1 0.00 -0.00 -0.00 -0.03 -0.04 -0.09 0.07 0.00 0.01  
41 6 -0.00 -0.00 0.00 -0.01 -0.00 -0.17 0.04 -0.06 0.09  
42 1 0.00 -0.00 -0.00 0.03 0.03 -0.16 -0.01 -0.10 0.09  
43 1 -0.00 -0.00 0.00 -0.04 -0.04 -0.17 0.09 -0.02 0.07  
44 1 0.00 -0.00 -0.00 -0.01 -0.00 -0.20 0.05 -0.08 0.11  
45 6 -0.00 0.00 0.00 0.00 -0.01 0.09 -0.02 -0.03 -0.01  
46 6 0.00 0.00 0.00 0.02 -0.02 0.11 -0.05 -0.02 -0.02  
47 6 -0.00 0.00 0.00 -0.02 0.02 0.10 0.01 -0.07 -0.03  
48 6 -0.00 0.00 0.00 0.02 -0.02 0.15 -0.06 -0.03 -0.06  
49 1 0.00 0.00 -0.00 0.03 -0.04 0.09 -0.07 0.00 -0.01  
50 6 -0.00 0.00 0.00 -0.01 0.02 0.15 -0.01 -0.08 -0.07  
51 1 0.00 0.00 -0.00 -0.03 0.03 0.09 0.04 -0.08 -0.02  
52 6 -0.00 0.00 0.00 0.01 -0.00 0.17 -0.04 -0.06 -0.09  
53 1 -0.00 0.00 0.00 0.04 -0.04 0.17 -0.09 -0.02 -0.07  
54 1 0.00 0.00 -0.00 -0.03 0.03 0.16 0.01 -0.10 -0.09  
55 1 0.00 0.00 -0.00 0.01 -0.00 0.20 -0.05 -0.08 -0.11  
56 6 -0.00 -0.00 -0.00 0.00 0.00 0.09 0.00 -0.01 0.01  
57 6 -0.00 0.00 -0.00 0.02 -0.02 0.11 0.01 -0.02 0.02  
58 6 -0.00 0.00 -0.00 -0.02 0.02 0.11 -0.01 -0.01 0.01  
59 6 -0.00 0.00 -0.00 0.02 -0.03 0.16 0.01 -0.02 0.03  
60 1 -0.00 -0.00 -0.00 0.04 -0.04 0.09 0.02 -0.02 0.02  
61 6 -0.00 0.00 0.00 -0.03 0.02 0.16 -0.01 -0.01 0.02  
62 1 -0.00 -0.00 -0.00 -0.04 0.04 0.09 -0.02 -0.01 0.00  
63 6 -0.00 0.00 0.00 -0.00 -0.00 0.18 0.00 -0.02 0.04  
64 1 -0.00 0.00 -0.00 0.04 -0.05 0.17 0.02 -0.02 0.04  
65 1 -0.00 0.00 -0.00 -0.05 0.04 0.17 -0.02 -0.01 0.03  
66 1 -0.00 0.00 -0.00 -0.00 -0.01 0.21 0.00 -0.02 0.05  
67 6 -0.00 0.00 -0.00 -0.00 0.00 -0.09 -0.00 -0.01 -0.01  
68 6 -0.00 -0.00 -0.00 -0.02 -0.02 -0.11 -0.01 -0.02 -0.02  
69 6 -0.00 -0.00 -0.00 0.02 0.02 -0.11 0.01 -0.01 -0.01  
70 6 -0.00 -0.00 -0.00 -0.02 -0.03 -0.16 -0.01 -0.02 -0.03  
71 1 -0.00 0.00 -0.00 -0.04 -0.04 -0.09 -0.02 -0.02 -0.02  
72 6 -0.00 -0.00 0.00 0.03 0.02 -0.16 0.01 -0.01 -0.02  
73 1 -0.00 0.00 -0.00 0.04 0.04 -0.09 0.02 -0.01 -0.00  
74 6 -0.00 -0.00 0.00 0.00 -0.00 -0.18 -0.00 -0.02 -0.04

```

75 1 -0.00 -0.00 -0.00 -0.04 -0.05 -0.17 -0.02 -0.02 -0.04
76 1 -0.00 -0.00 -0.00 0.05 0.04 -0.17 0.02 -0.01 -0.03
77 1 -0.00 -0.00 -0.00 0.00 -0.01 -0.21 -0.00 -0.02 -0.05
78 6 -0.26 -0.00 -0.53 -0.00 0.04 0.00 -0.00 0.39 0.00
79 8 0.16 0.00 0.70 -0.00 0.02 0.00 -0.00 -0.01 0.00
80 8 -0.02 0.00 0.07 -0.00 0.03 0.00 -0.00 0.76 0.00

```

TCO<sub>2</sub>-P

-----  
Center Atomic Atomic Coordinates (Angstroms)

Number Number Type X Y Z  
-----

```

1 7 0 -1.571500 -1.301530 -0.249150
2 7 0 -1.189832 1.565459 0.000993
3 7 0 1.894392 1.477940 0.400282
4 7 0 1.307353 -1.558818 0.046138
5 6 0 -1.493466 -2.662353 -0.363781
6 6 0 -2.816487 -3.177709 -0.669356
7 6 0 -3.668611 -2.108831 -0.691561
8 6 0 -2.876886 -0.926671 -0.403772
9 6 0 -3.364133 0.383069 -0.247704
10 6 0 -2.560167 1.522441 -0.010355
11 6 0 -3.087759 2.847784 0.244916
12 6 0 -2.016507 3.683829 0.363734
13 6 0 -0.817194 2.884915 0.181992
14 6 0 0.471082 3.462793 0.065381
15 6 0 1.691426 2.762580 -0.040421
16 6 0 2.902173 3.149308 -0.719630
17 6 0 3.760231 2.074433 -0.707238
18 6 0 3.107635 0.988936 -0.019658
19 6 0 3.520842 -0.353436 0.112456
20 6 0 2.672836 -1.481298 0.242688
21 6 0 3.185476 -2.821692 0.466431
22 6 0 2.134633 -3.684612 0.359567
23 6 0 0.961239 -2.884218 0.068725
24 6 0 -0.325291 -3.423452 -0.175388
25 1 0 -3.056088 -4.221852 -0.851096
26 1 0 -4.736524 -2.113455 -0.892736
27 1 0 -4.141119 3.097420 0.335546
28 1 0 -2.031092 4.750055 0.570452
29 1 0 3.042301 4.102608 -1.222421
30 1 0 4.726401 1.993004 -1.198255
31 1 0 4.219427 -3.065248 0.693264
32 1 0 2.144943 -4.763847 0.482459

```

33 29 0 -0.103257 -0.126670 0.240660  
34 6 0 0.582098 4.939408 -0.093990  
35 6 0 1.466830 5.669094 0.720762  
36 6 0 -0.144285 5.630385 -1.081114  
37 6 0 1.605497 7.049402 0.568011  
38 1 0 2.036213 5.141626 1.488703  
39 6 0 -0.001483 7.009775 -1.237124  
40 1 0 -0.810770 5.071218 -1.740150  
41 6 0 0.870751 7.724817 -0.410777  
42 1 0 2.288273 7.600892 1.218829  
43 1 0 -0.567890 7.528164 -2.014579  
44 1 0 0.980854 8.805014 -0.532652  
45 6 0 4.986814 -0.573874 -0.028760  
46 6 0 5.508824 -1.456321 -0.992270  
47 6 0 5.886758 0.144456 0.779445  
48 6 0 6.886944 -1.625581 -1.132025  
49 1 0 4.821923 -1.996677 -1.646005  
50 6 0 7.264815 -0.029129 0.643127  
51 1 0 5.491453 0.832223 1.529661  
52 6 0 7.769729 -0.915721 -0.312449  
53 1 0 7.274179 -2.309223 -1.891406  
54 1 0 7.947802 0.528150 1.288770  
55 1 0 8.848565 -1.050016 -0.421460  
56 6 0 -4.843144 0.575550 -0.304584  
57 6 0 -5.668208 0.007528 0.680306  
58 6 0 -5.437085 1.323327 -1.334080  
59 6 0 -7.053089 0.181095 0.634913  
60 1 0 -5.208182 -0.559626 1.492030  
61 6 0 -6.822200 1.495463 -1.380586  
62 1 0 -4.801773 1.764251 -2.105276  
63 6 0 -7.634300 0.924488 -0.396394  
64 1 0 -7.680633 -0.261624 1.412265  
65 1 0 -7.269765 2.074985 -2.191732  
66 1 0 -8.717914 1.059900 -0.432408  
67 6 0 -0.456168 -4.909099 -0.231930  
68 6 0 -1.247046 -5.594928 0.705117  
69 6 0 0.204525 -5.651694 -1.224972  
70 6 0 -1.373466 -6.984604 0.651470  
71 1 0 -1.756006 -5.027302 1.486923  
72 6 0 0.077110 -7.041003 -1.280317  
73 1 0 0.815272 -5.126555 -1.962324  
74 6 0 -0.712162 -7.712192 -0.341892  
75 1 0 -1.987358 -7.501919 1.392806  
76 1 0 0.593218 -7.601788 -2.063412



77 1 0 -0.811168 -8.799466 -0.384457  
78 6 0 -1.471937 -0.625852 2.705334  
79 8 0 1.128602 0.877519 1.299919  
80 8 0 -2.566869 -0.415327 2.902356

TCO-R

-----  
Center Atomic Atomic Coordinates (Angstroms)

Number Number Type X Y Z  
-----

1 7 0 1.890050 -0.656799 -0.342136  
2 7 0 -0.730645 -1.881807 0.121266  
3 7 0 -2.311351 0.730388 0.349350  
4 7 0 0.507022 1.890488 0.078645  
5 6 0 2.984292 0.147231 -0.443111  
6 6 0 4.164619 -0.684899 -0.620200  
7 6 0 3.740985 -1.984853 -0.591217  
8 6 0 2.298487 -1.954955 -0.398470  
9 6 0 1.453484 -3.063597 -0.188778  
10 6 0 0.057887 -3.005014 0.051871  
11 6 0 -0.776592 -4.187446 0.163266  
12 6 0 -2.064631 -3.756939 0.271125  
13 6 0 -2.042019 -2.304010 0.209467  
14 6 0 -3.232844 -1.537472 0.109581  
15 6 0 -3.317398 -0.131947 0.015408  
16 6 0 -4.364978 0.672176 -0.552740  
17 6 0 -3.934408 1.984592 -0.560264  
18 6 0 -2.612065 2.017392 0.002587  
19 6 0 -1.709890 3.099942 0.081368  
20 6 0 -0.295886 3.010240 0.169417  
21 6 0 0.550039 4.192632 0.215997  
22 6 0 1.840669 3.772971 0.095491  
23 6 0 1.807431 2.326068 -0.010139  
24 6 0 2.961579 1.543661 -0.259082  
25 1 0 5.183092 -0.320138 -0.724928  
26 1 0 4.348899 -2.882431 -0.667600  
27 1 0 -0.420590 -5.213262 0.138512  
28 1 0 -2.957428 -4.366820 0.371222  
29 1 0 -5.290853 0.279951 -0.965388  
30 1 0 -4.449318 2.844864 -0.979991  
31 1 0 0.195320 5.214033 0.316161  
32 1 0 2.737423 4.384933 0.059958  
33 29 0 0.196676 -0.093949 0.489887

34 6 0 -4.533901 -2.252775 -0.044206  
35 6 0 -5.583887 -2.004825 0.856486  
36 6 0 -4.759621 -3.140826 -1.110655  
37 6 0 -6.818162 -2.640478 0.707628  
38 1 0 -5.419329 -1.313495 1.685675  
39 6 0 -5.994950 -3.772484 -1.262696  
40 1 0 -3.959268 -3.321599 -1.830711  
41 6 0 -7.027255 -3.527345 -0.352056  
42 1 0 -7.619285 -2.443663 1.424138  
43 1 0 -6.154726 -4.454459 -2.101354  
44 1 0 -7.993448 -4.023483 -0.470752  
45 6 0 -2.334085 4.446197 -0.078355  
46 6 0 -3.323227 4.874421 0.823652  
47 6 0 -1.993799 5.288787 -1.151340  
48 6 0 -3.941128 6.117030 0.669705  
49 1 0 -3.597152 4.225178 1.657929  
50 6 0 -2.614881 6.528825 -1.308378  
51 1 0 -1.245212 4.955530 -1.872614  
52 6 0 -3.587989 6.948824 -0.396406  
53 1 0 -4.700180 6.437726 1.387279  
54 1 0 -2.342718 7.167654 -2.152056  
55 1 0 -4.072545 7.920380 -0.519107  
56 6 0 2.092528 -4.413481 -0.217680  
57 6 0 2.631588 -4.927767 -1.407673  
58 6 0 2.178824 -5.186121 0.951982  
59 6 0 3.238974 -6.185435 -1.429094  
60 1 0 2.563476 -4.334606 -2.322246  
61 6 0 2.786461 -6.443198 0.930878  
62 1 0 1.771323 -4.786273 1.882961  
63 6 0 3.317979 -6.947101 -0.259889  
64 1 0 3.648685 -6.573699 -2.364796  
65 1 0 2.849798 -7.029820 1.850639  
66 1 0 3.793333 -7.930757 -0.276283  
67 6 0 4.277849 2.249627 -0.299664  
68 6 0 4.833153 2.776718 0.877558  
69 6 0 4.989089 2.380375 -1.502278  
70 6 0 6.069319 3.425711 0.849946  
71 1 0 4.289884 2.659159 1.817244  
72 6 0 6.225642 3.029964 -1.529598  
73 1 0 4.560621 1.973211 -2.420847  
74 6 0 6.768580 3.555382 -0.353742  
75 1 0 6.491168 3.827210 1.774594  
76 1 0 6.765582 3.128937 -2.474500  
77 1 0 7.735714 4.063379 -0.374922

78 1 0 -1.570552 0.492713 1.050415  
79 1 0 -0.450716 0.140914 1.923958  
80 6 0 2.415668 -0.623985 2.736185  
81 8 0 2.898836 0.394560 2.843688

TCO-TS1

-----  
Center Atomic Atomic Coordinates (Angstroms)

Number Number Type X Y Z  
-----

1 7 0 -0.575803 -2.039220 -0.114582  
2 7 0 -1.958254 0.512903 -0.114462  
3 7 0 0.545661 2.182787 -0.563495  
4 7 0 1.912916 -0.434399 -0.209037  
5 6 0 0.304522 -3.076941 -0.123473  
6 6 0 -0.433643 -4.330240 -0.091319  
7 6 0 -1.761615 -4.005627 -0.085351  
8 6 0 -1.835171 -2.553934 -0.112195  
9 6 0 -3.003903 -1.768453 -0.155142  
10 6 0 -3.024021 -0.356537 -0.226511  
11 6 0 -4.237412 0.391790 -0.489408  
12 6 0 -3.893413 1.709746 -0.520435  
13 6 0 -2.464341 1.780277 -0.278868  
14 6 0 -1.767863 3.014319 -0.253087  
15 6 0 -0.373079 3.167214 -0.285798  
16 6 0 0.385228 4.334819 0.064984  
17 6 0 1.720327 4.004448 0.033228  
18 6 0 1.827772 2.622215 -0.336432  
19 6 0 2.981079 1.823165 -0.352054  
20 6 0 2.982863 0.406129 -0.379407  
21 6 0 4.196008 -0.363764 -0.607636  
22 6 0 3.841050 -1.676380 -0.552975  
23 6 0 2.409907 -1.715458 -0.292265  
24 6 0 1.704380 -2.936983 -0.187971  
25 1 0 0.006318 -5.323614 -0.077093  
26 1 0 -2.610679 -4.683282 -0.062704  
27 1 0 -5.216772 -0.044118 -0.664427  
28 1 0 -4.535194 2.559831 -0.733301  
29 1 0 -0.052905 5.282836 0.363089  
30 1 0 2.563319 4.634851 0.301036  
31 1 0 5.176011 0.053250 -0.821774  
32 1 0 4.476795 -2.544069 -0.703911  
33 29 0 -0.186720 -0.254459 0.710355

34 6 0 -2.567342 4.267334 -0.147659  
35 6 0 -3.477615 4.452313 0.908283  
36 6 0 -2.417718 5.298474 -1.091653  
37 6 0 -4.217015 5.631124 1.014940  
38 1 0 -3.591416 3.663693 1.654617  
39 6 0 -3.158804 6.476933 -0.986437  
40 1 0 -1.721446 5.161964 -1.921723  
41 6 0 -4.061021 6.647411 0.067493  
42 1 0 -4.914247 5.759702 1.846374  
43 1 0 -3.035658 7.263320 -1.735057  
44 1 0 -4.640765 7.569751 0.150657  
45 6 0 4.285716 2.537023 -0.277924  
46 6 0 5.202763 2.256016 0.750779  
47 6 0 4.619917 3.523020 -1.222931  
48 6 0 6.418388 2.937107 0.828328  
49 1 0 4.946049 1.504541 1.499916  
50 6 0 5.836728 4.203145 -1.146396  
51 1 0 3.919585 3.743236 -2.031355  
52 6 0 6.740402 3.912262 -0.120489  
53 1 0 7.115242 2.710127 1.638764  
54 1 0 6.082932 4.959607 -1.895509  
55 1 0 7.692596 4.444597 -0.059767  
56 6 0 -4.314998 -2.481202 -0.173540  
57 6 0 -4.658622 -3.332863 -1.236695  
58 6 0 -5.232604 -2.313655 0.877104  
59 6 0 -5.885718 -3.999355 -1.248481  
60 1 0 -3.957777 -3.459184 -2.064488  
61 6 0 -6.458502 -2.981913 0.867110  
62 1 0 -4.971723 -1.656888 1.709665  
63 6 0 -6.789153 -3.827160 -0.195927  
64 1 0 -6.139576 -4.652280 -2.087135  
65 1 0 -7.157371 -2.844465 1.695805  
66 1 0 -7.748857 -4.349332 -0.204703  
67 6 0 2.512118 -4.194765 -0.186430  
68 6 0 3.352393 -4.496211 0.897684  
69 6 0 2.447512 -5.097065 -1.260330  
70 6 0 4.106735 -5.671306 0.909165  
71 1 0 3.404988 -3.800053 1.737539  
72 6 0 3.203936 -6.271186 -1.250773  
73 1 0 1.804384 -4.864916 -2.111897  
74 6 0 4.034977 -6.562514 -0.165320  
75 1 0 4.751515 -5.893057 1.763064  
76 1 0 3.147242 -6.959429 -2.097683  
77 1 0 4.626124 -7.481372 -0.157329

78 1 0 0.320261 1.250461 -0.891912  
79 1 0 0.121834 0.890214 1.818783  
80 6 0 0.507575 -0.475243 2.535621  
81 8 0 1.068762 -0.314536 3.534096

\*\*\*\*\* 1 imaginary frequencies (negative Signs) \*\*\*\*\*

Diagonal vibrational polarizability:

49.8564255 29.0063974 54.7253604

Harmonic frequencies (cm<sup>-1</sup>), IR intensities (KM/Mole), Raman scattering activities (A<sup>4</sup>/AMU), depolarization ratios for plane and unpolarized incident light, reduced masses (AMU), force constants (mDyne/A), and normal coordinates:

1 2 3

A A A

Frequencies -- -484.0061 11.5591 21.9832

Red. masses -- 1.6517 6.1349 13.5009

Frc consts -- 0.2280 0.0005 0.0038

IR Inten --104.4256 0.0007 0.5297

Atom AN X Y Z X Y Z X Y Z

1 7 -0.00 -0.01 -0.01 0.00 -0.00 -0.00 -0.03 0.01 0.03  
2 7 0.01 0.01 0.02 0.00 -0.00 -0.00 -0.03 -0.01 0.03  
3 7 -0.00 -0.02 0.03 0.01 -0.00 -0.00 -0.01 -0.02 0.02  
4 7 -0.00 0.01 -0.00 0.00 0.00 -0.00 -0.01 0.01 -0.04  
5 6 -0.00 -0.00 -0.00 0.00 0.00 -0.02 -0.02 0.01 0.02  
6 6 -0.00 -0.00 0.00 0.01 -0.00 -0.01 -0.01 0.01 0.02  
7 6 -0.00 -0.01 0.00 0.01 -0.00 0.02 -0.02 -0.00 0.02  
8 6 0.00 -0.00 -0.00 0.00 -0.00 0.03 -0.03 -0.00 0.03  
9 6 0.00 0.00 0.00 0.00 -0.00 0.05 -0.03 -0.01 0.02  
10 6 0.01 0.00 0.00 0.00 -0.01 0.03 -0.03 -0.01 0.01  
11 6 0.00 -0.00 -0.00 -0.00 -0.01 0.02 -0.02 -0.01 -0.01  
12 6 -0.00 -0.00 -0.00 -0.00 -0.01 -0.02 -0.02 -0.01 -0.01  
13 6 -0.00 0.00 0.00 0.00 -0.01 -0.03 -0.02 -0.01 0.01  
14 6 -0.00 0.00 0.00 -0.00 -0.00 -0.05 -0.01 -0.02 0.01  
15 6 -0.00 -0.00 0.01 -0.00 -0.00 -0.03 -0.01 -0.02 0.02  
16 6 -0.00 -0.00 -0.00 -0.01 0.00 -0.02 -0.02 -0.02 0.03  
17 6 -0.00 -0.00 -0.00 -0.01 0.01 0.01 -0.01 -0.01 0.03  
18 6 0.00 -0.00 0.01 -0.00 0.00 0.02 -0.01 -0.01 0.02  
19 6 0.00 0.00 -0.00 0.00 0.01 0.05 -0.00 -0.00 -0.00  
20 6 0.00 -0.00 -0.00 0.00 0.01 0.03 -0.00 -0.00 -0.03  
21 6 0.00 -0.00 -0.00 0.01 0.01 0.02 -0.00 -0.01 -0.02  
22 6 -0.00 -0.00 0.00 0.00 0.01 -0.02 -0.01 -0.00 -0.02  
23 6 -0.00 0.00 0.00 0.00 0.00 -0.02 -0.02 0.01 -0.03  
24 6 -0.00 0.00 -0.00 0.00 0.00 -0.04 -0.02 0.01 -0.00  
25 1 -0.00 -0.00 0.00 0.01 0.00 -0.03 -0.01 0.01 0.01  
26 1 -0.00 -0.01 0.00 0.01 -0.01 0.04 -0.01 -0.01 0.02

27 1 0.01 -0.00 -0.00 -0.00 -0.02 0.04 -0.02 -0.00 -0.03  
28 1 -0.00 -0.00 -0.00 -0.00 -0.02 -0.04 -0.01 -0.01 -0.03  
29 1 0.00 0.00 -0.01 -0.02 0.00 -0.04 -0.02 -0.02 0.04  
30 1 -0.00 0.00 -0.01 -0.02 0.01 0.03 -0.02 -0.01 0.03  
31 1 0.00 -0.00 0.00 0.01 0.02 0.04 0.00 -0.01 -0.01  
32 1 -0.00 -0.00 0.00 0.01 0.01 -0.03 -0.02 -0.01 -0.01  
33 29 0.00 -0.02 -0.01 0.01 0.00 -0.00 -0.07 0.01 0.04  
34 6 -0.00 0.00 -0.00 -0.00 -0.00 -0.09 -0.01 -0.01 -0.00  
35 6 -0.00 0.00 -0.00 -0.02 0.03 -0.10 -0.03 -0.00 -0.02  
36 6 -0.00 0.00 -0.00 0.01 -0.03 -0.11 0.01 -0.02 -0.01  
37 6 -0.00 0.00 0.00 -0.02 0.03 -0.14 -0.03 -0.00 -0.04  
38 1 -0.00 0.00 -0.00 -0.02 0.05 -0.08 -0.04 -0.00 -0.02  
39 6 -0.00 0.00 -0.00 0.01 -0.02 -0.15 0.01 -0.02 -0.02  
40 1 -0.00 0.00 -0.00 0.02 -0.05 -0.10 0.02 -0.02 0.01  
41 6 -0.00 0.00 0.00 -0.00 0.01 -0.17 -0.01 -0.01 -0.04  
42 1 -0.00 0.00 -0.00 -0.02 0.06 -0.15 -0.04 0.00 -0.05  
43 1 -0.00 0.00 0.00 0.02 -0.04 -0.17 0.02 -0.02 -0.03  
44 1 -0.00 0.00 0.00 -0.00 0.01 -0.20 -0.01 -0.01 -0.06  
45 6 0.00 0.00 -0.00 -0.00 0.00 0.09 -0.00 -0.00 0.02  
46 6 0.00 0.00 0.00 -0.03 -0.02 0.11 -0.02 -0.02 0.03  
47 6 0.00 0.00 -0.00 0.03 0.02 0.11 0.01 0.02 0.05  
48 6 0.00 0.00 0.00 -0.03 -0.02 0.15 -0.02 -0.02 0.06  
49 1 0.00 -0.00 -0.00 -0.05 -0.03 0.09 -0.03 -0.04 0.01  
50 6 0.00 0.00 -0.00 0.03 0.01 0.16 0.00 0.02 0.09  
51 1 0.00 -0.00 -0.00 0.05 0.03 0.10 0.02 0.04 0.05  
52 6 0.00 0.00 0.00 -0.00 -0.00 0.18 -0.01 0.00 0.09  
53 1 0.00 -0.00 0.00 -0.05 -0.03 0.17 -0.03 -0.04 0.07  
54 1 0.00 0.00 -0.00 0.05 0.03 0.18 0.01 0.04 0.11  
55 1 0.00 -0.00 0.00 -0.00 -0.01 0.21 -0.01 0.00 0.12  
56 6 0.00 0.00 -0.00 0.00 -0.00 0.09 -0.03 -0.01 -0.01  
57 6 0.00 0.00 0.00 -0.03 -0.02 0.11 -0.00 -0.02 -0.01  
58 6 0.00 0.00 -0.00 0.03 0.02 0.11 -0.06 -0.00 -0.04  
59 6 0.00 0.00 0.00 -0.03 -0.02 0.15 -0.00 -0.02 -0.04  
60 1 0.00 -0.00 0.00 -0.05 -0.03 0.09 0.02 -0.03 0.01  
61 6 0.00 0.00 0.00 0.03 0.02 0.15 -0.06 -0.00 -0.06  
62 1 0.00 -0.00 0.00 0.05 0.03 0.09 -0.08 0.01 -0.04  
63 6 0.00 0.00 -0.00 -0.00 0.00 0.17 -0.03 -0.01 -0.06  
64 1 0.00 0.00 0.00 -0.05 -0.03 0.17 0.02 -0.03 -0.04  
65 1 0.00 -0.00 0.00 0.05 0.03 0.17 -0.08 0.01 -0.09  
66 1 0.00 0.00 0.00 -0.00 0.00 0.21 -0.03 -0.01 -0.09  
67 6 0.00 0.00 -0.00 0.00 0.00 -0.09 -0.03 0.01 0.01  
68 6 -0.00 0.00 0.00 0.02 -0.03 -0.11 -0.05 0.01 0.03  
69 6 -0.00 0.00 -0.00 -0.02 0.03 -0.11 -0.00 0.01 0.01  
70 6 -0.00 0.00 -0.00 0.01 -0.04 -0.15 -0.06 0.01 0.05

|    |   |       |       |       |       |       |       |       |       |       |
|----|---|-------|-------|-------|-------|-------|-------|-------|-------|-------|
| 71 | 1 | -0.00 | 0.00  | 0.00  | 0.03  | -0.06 | -0.09 | -0.07 | 0.01  | 0.03  |
| 72 | 6 | -0.00 | 0.00  | -0.00 | -0.02 | 0.03  | -0.15 | -0.01 | 0.01  | 0.02  |
| 73 | 1 | -0.00 | -0.00 | -0.00 | -0.03 | 0.05  | -0.09 | 0.02  | 0.02  | -0.01 |
| 74 | 6 | -0.00 | 0.00  | 0.00  | -0.01 | -0.01 | -0.17 | -0.04 | 0.01  | 0.05  |
| 75 | 1 | -0.00 | 0.00  | 0.00  | 0.02  | -0.06 | -0.17 | -0.08 | 0.00  | 0.06  |
| 76 | 1 | -0.00 | 0.00  | 0.00  | -0.04 | 0.05  | -0.17 | 0.01  | 0.01  | 0.02  |
| 77 | 1 | -0.00 | 0.00  | 0.00  | -0.01 | -0.01 | -0.21 | -0.04 | 0.00  | 0.06  |
| 78 | 1 | -0.00 | 0.00  | -0.02 | 0.02  | -0.00 | -0.00 | 0.01  | -0.02 | 0.01  |
| 79 | 1 | 0.33  | -0.59 | 0.70  | 0.01  | 0.00  | -0.01 | -0.03 | 0.00  | 0.05  |
| 80 | 6 | -0.04 | 0.21  | -0.07 | -0.00 | 0.00  | 0.00  | 0.38  | 0.04  | -0.13 |
| 81 | 8 | 0.00  | -0.04 | 0.01  | -0.01 | 0.00  | 0.00  | 0.71  | 0.08  | -0.32 |

TCO-INT1

-----  
Center Atomic Atomic Coordinates (Angstroms)

Number Number Type X Y Z

-----

|    |   |   |           |           |           |
|----|---|---|-----------|-----------|-----------|
| 1  | 7 | 0 | 2.138260  | 0.000038  | -0.348918 |
| 2  | 7 | 0 | 0.000228  | -2.004154 | 0.079550  |
| 3  | 7 | 0 | -2.281445 | -0.000041 | 0.381133  |
| 4  | 7 | 0 | 0.000151  | 2.004153  | 0.079552  |
| 5  | 6 | 0 | 2.933643  | 1.102176  | -0.308894 |
| 6  | 6 | 0 | 4.331795  | 0.682800  | -0.314521 |
| 7  | 6 | 0 | 4.331819  | -0.682640 | -0.314525 |
| 8  | 6 | 0 | 2.933683  | -1.102068 | -0.308900 |
| 9  | 6 | 0 | 2.462815  | -2.423545 | -0.147499 |
| 10 | 6 | 0 | 1.112066  | -2.814653 | 0.037054  |
| 11 | 6 | 0 | 0.694081  | -4.200735 | 0.146873  |
| 12 | 6 | 0 | -0.666422 | -4.202989 | 0.240065  |
| 13 | 6 | 0 | -1.103567 | -2.820046 | 0.167905  |
| 14 | 6 | 0 | -2.469898 | -2.449565 | 0.058963  |
| 15 | 6 | 0 | -2.960082 | -1.133521 | -0.033977 |
| 16 | 6 | 0 | -4.142765 | -0.690228 | -0.709510 |
| 17 | 6 | 0 | -4.142793 | 0.690070  | -0.709510 |
| 18 | 6 | 0 | -2.960125 | 1.133411  | -0.033982 |
| 19 | 6 | 0 | -2.469991 | 2.449474  | 0.058952  |
| 20 | 6 | 0 | -1.103674 | 2.820006  | 0.167895  |
| 21 | 6 | 0 | -0.666579 | 4.202964  | 0.240050  |
| 22 | 6 | 0 | 0.693924  | 4.200758  | 0.146867  |
| 23 | 6 | 0 | 1.111960  | 2.814691  | 0.037056  |
| 24 | 6 | 0 | 2.462725  | 2.423633  | -0.147491 |
| 25 | 1 | 0 | 5.192249  | 1.345948  | -0.280181 |
| 26 | 1 | 0 | 5.192298  | -1.345758 | -0.280189 |
| 27 | 1 | 0 | 1.356373  | -5.061269 | 0.133904  |

28 1 0 -1.319537 -5.064592 0.343057  
29 1 0 -4.847446 -1.348647 -1.210895  
30 1 0 -4.847501 1.348461 -1.210896  
31 1 0 -1.319726 5.064545 0.343033  
32 1 0 1.356185 5.061317 0.133898  
33 29 0 0.226533 0.000003 0.291469  
34 6 0 -3.489961 -3.519433 -0.135890  
35 6 0 -4.609036 -3.585274 0.712521  
36 6 0 -3.390617 -4.446552 -1.188774  
37 6 0 -5.590386 -4.560723 0.526944  
38 1 0 -4.696477 -2.867354 1.530737  
39 6 0 -4.374277 -5.418503 -1.377609  
40 1 0 -2.540375 -4.388061 -1.870814  
41 6 0 -5.475475 -5.481519 -0.518223  
42 1 0 -6.447434 -4.603229 1.203386  
43 1 0 -4.284513 -6.125852 -2.205616  
44 1 0 -6.244134 -6.243868 -0.665821  
45 6 0 -3.490091 3.519304 -0.135906  
46 6 0 -4.609174 3.585104 0.712499  
47 6 0 -3.390777 4.446427 -1.188790  
48 6 0 -5.590559 4.560515 0.526917  
49 1 0 -4.696593 2.867180 1.530715  
50 6 0 -4.374473 5.418340 -1.377630  
51 1 0 -2.540531 4.387967 -1.870827  
52 6 0 -5.475678 5.481316 -0.518249  
53 1 0 -6.447611 4.602990 1.203355  
54 1 0 -4.284730 6.125692 -2.205638  
55 1 0 -6.244363 6.243638 -0.665852  
56 6 0 3.498246 -3.500897 -0.138200  
57 6 0 4.258514 -3.766258 -1.288774  
58 6 0 3.748228 -4.252829 1.021650  
59 6 0 5.238392 -4.761441 -1.282397  
60 1 0 4.069095 -3.187384 -2.195294  
61 6 0 4.729139 -5.246521 1.029398  
62 1 0 3.170221 -4.045092 1.924640  
63 6 0 5.476723 -5.505020 -0.123229  
64 1 0 5.816321 -4.958808 -2.188575  
65 1 0 4.914146 -5.818136 1.942157  
66 1 0 6.244014 -6.282847 -0.117370  
67 6 0 3.498116 3.501025 -0.138184  
68 6 0 3.748063 4.252963 1.021670  
69 6 0 4.258377 3.766420 -1.288754  
70 6 0 4.728937 5.246692 1.029425  
71 1 0 3.170061 4.045201 1.924657



```

72 6 0 5.238217 4.761640 -1.282370
73 1 0 4.068984 3.187540 -2.195276
74 6 0 5.476514 5.505225 -0.123198
75 1 0 4.913920 5.818312 1.942187
76 1 0 5.816142 4.959030 -2.188546
77 1 0 6.243776 6.283079 -0.117335
78 1 0 -1.843550 -0.000032 1.318457
79 1 0 0.982961 0.000028 2.934706
80 6 0 0.041176 0.000003 2.303622
81 8 0 -1.029570 -0.000002 2.870045

```

TCO-TS2

-----  
Center Atomic Atomic Coordinates (Angstroms)

Number Number Type X Y Z

-----

```

1 7 0 1.993247 -0.804229 -0.242681
2 7 0 -0.738043 -1.824196 -0.033274
3 7 0 -2.032405 0.863105 0.102929
4 7 0 0.788833 1.844273 0.024375
5 6 0 3.153519 -0.089825 -0.238608
6 6 0 4.275235 -1.013904 -0.289686
7 6 0 3.749500 -2.275598 -0.301305
8 6 0 2.303288 -2.130865 -0.257657
9 6 0 1.363703 -3.173713 -0.142721
10 6 0 -0.034857 -3.005846 -0.020126
11 6 0 -0.962507 -4.114972 0.081504
12 6 0 -2.216385 -3.584319 0.127978
13 6 0 -2.080084 -2.142597 0.032836
14 6 0 -3.200960 -1.282750 -0.070681
15 6 0 -3.155229 0.122261 -0.150180
16 6 0 -4.200012 1.023783 -0.569603
17 6 0 -3.671847 2.295410 -0.559446
18 6 0 -2.298278 2.185525 -0.133105
19 6 0 -1.335488 3.208605 -0.033817
20 6 0 0.065243 3.022378 0.077209
21 6 0 0.990849 4.135045 0.167629
22 6 0 2.252914 3.620675 0.123342
23 6 0 2.124027 2.181450 0.028417
24 6 0 3.230527 1.309850 -0.103275
25 1 0 5.324560 -0.731314 -0.287347
26 1 0 4.287469 -3.219773 -0.310651
27 1 0 -0.685276 -5.164687 0.103504

```

28 1 0 -3.157517 -4.118489 0.216278  
29 1 0 -5.197965 0.725786 -0.881720  
30 1 0 -4.163581 3.216855 -0.861482  
31 1 0 0.706236 5.179935 0.246016  
32 1 0 3.191641 4.166514 0.137939  
33 29 0 0.203309 -0.067046 0.144463  
34 6 0 -4.557864 -1.894968 -0.180032  
35 6 0 -5.544002 -1.600838 0.776422  
36 6 0 -4.890920 -2.740074 -1.252380  
37 6 0 -6.825023 -2.146638 0.671097  
38 1 0 -5.292560 -0.946627 1.613850  
39 6 0 -6.172819 -3.282071 -1.360459  
40 1 0 -4.136195 -2.960545 -2.009965  
41 6 0 -7.143351 -2.989066 -0.397673  
42 1 0 -7.576811 -1.915284 1.429538  
43 1 0 -6.416745 -3.932213 -2.204148  
44 1 0 -8.146020 -3.414979 -0.481591  
45 6 0 -1.859027 4.603102 -0.140362  
46 6 0 -2.768128 5.091332 0.812944  
47 6 0 -1.492276 5.438547 -1.209335  
48 6 0 -3.286188 6.384024 0.709064  
49 1 0 -3.060654 4.448403 1.645864  
50 6 0 -2.013109 6.729307 -1.315987  
51 1 0 -0.801035 5.061669 -1.965828  
52 6 0 -2.909709 7.207345 -0.355587  
53 1 0 -3.985282 6.750242 1.464772  
54 1 0 -1.721950 7.363057 -2.157159  
55 1 0 -3.316035 8.218154 -0.438703  
56 6 0 1.901204 -4.567973 -0.126230  
57 6 0 2.489479 -5.119716 -1.275312  
58 6 0 1.843607 -5.344694 1.042336  
59 6 0 3.004286 -6.418112 -1.258364  
60 1 0 2.534515 -4.522439 -2.188647  
61 6 0 2.358610 -6.642602 1.059637  
62 1 0 1.396000 -4.918109 1.942598  
63 6 0 2.940039 -7.183577 -0.090804  
64 1 0 3.454266 -6.834711 -2.162842  
65 1 0 2.309853 -7.232384 1.978234  
66 1 0 3.342902 -8.199103 -0.076974  
67 6 0 4.597157 1.913603 -0.084720  
68 6 0 5.105349 2.506508 1.082546  
69 6 0 5.405633 1.883973 -1.232327  
70 6 0 6.387920 3.058479 1.100813  
71 1 0 4.486730 2.524506 1.982399

72 6 0 6.688408 2.436324 -1.214793  
73 1 0 5.016100 1.428070 -2.145155  
74 6 0 7.183418 3.025615 -0.048177  
75 1 0 6.769746 3.511632 2.018914  
76 1 0 7.302474 2.409395 -2.118276  
77 1 0 8.186988 3.457334 -0.033920  
78 1 0 -1.268314 0.532595 1.073283  
79 1 0 -0.076037 1.135297 2.805790  
80 6 0 -0.568398 0.237665 2.312117  
81 8 0 -0.831199 -0.735460 2.969718

\*\*\*\*\* 1 imaginary frequencies (negative Signs) \*\*\*\*\*

Diagonal vibrational polarizability:

61.6606347 22.8283000 56.7865780

Harmonic frequencies (cm<sup>-1</sup>), IR intensities (KM/Mole), Raman scattering activities (A<sup>4</sup>/AMU), depolarization ratios for plane and unpolarized incident light, reduced masses (AMU), force constants (mDyne/A), and normal coordinates:

1 2 3

A A A

Frequencies -- -1872.9858 12.6144 25.5990

Red. masses -- 1.0546 6.1042 6.1985

Frc consts -- 2.1798 0.0006 0.0024

IR Inten -- 1003.3357 0.0151 0.5886

Atom AN X Y Z X Y Z X Y Z

1 7 0.01 -0.00 0.01 0.00 0.00 -0.00 0.00 -0.00 0.09  
2 7 -0.01 0.00 -0.00 0.00 -0.00 -0.00 -0.00 0.00 0.09  
3 7 -0.00 0.00 -0.03 0.00 0.00 0.00 0.01 -0.00 0.07  
4 7 -0.00 0.00 -0.00 -0.00 0.00 0.00 -0.00 0.00 0.08  
5 6 -0.00 -0.01 0.00 0.00 0.00 -0.03 0.00 -0.00 0.06  
6 6 0.00 -0.00 -0.00 0.00 0.00 -0.02 0.01 -0.00 0.01  
7 6 0.00 -0.00 -0.00 0.00 0.00 0.01 0.01 -0.00 0.02  
8 6 0.00 0.00 0.00 0.00 0.00 0.02 0.00 -0.00 0.06  
9 6 -0.00 0.00 0.00 0.00 0.00 0.04 0.00 0.00 0.06  
10 6 -0.00 0.00 -0.00 0.00 -0.00 0.02 -0.00 0.00 0.08  
11 6 -0.00 -0.00 -0.00 0.01 -0.00 0.02 0.00 0.00 0.08  
12 6 -0.00 -0.00 0.00 0.01 -0.00 -0.02 -0.00 -0.00 0.08  
13 6 0.00 -0.00 0.00 0.00 -0.00 -0.02 -0.00 -0.00 0.08  
14 6 -0.00 -0.00 -0.00 0.00 -0.00 -0.04 -0.00 0.00 0.05  
15 6 -0.01 -0.01 -0.00 0.00 -0.00 -0.02 -0.00 0.00 0.05  
16 6 0.01 -0.01 -0.00 -0.00 -0.01 -0.02 -0.01 0.01 0.01  
17 6 0.01 -0.00 -0.00 -0.00 -0.01 0.02 -0.01 0.01 0.01  
18 6 0.00 0.02 -0.00 0.00 -0.00 0.03 -0.00 0.00 0.05  
19 6 -0.00 0.00 -0.00 -0.00 -0.00 0.05 -0.00 0.00 0.05  
20 6 0.00 -0.00 0.00 -0.00 0.00 0.03 -0.00 0.00 0.07

21 6 0.00 0.00 0.00 -0.00 0.00 0.02 -0.00 0.00 0.07  
22 6 -0.00 0.00 -0.00 -0.00 0.00 -0.01 -0.00 -0.00 0.07  
23 6 -0.00 -0.00 -0.00 -0.00 0.00 -0.02 -0.00 0.00 0.07  
24 6 -0.00 -0.00 0.00 0.00 0.00 -0.04 0.00 -0.00 0.05  
25 1 0.00 -0.01 -0.00 0.00 0.00 -0.03 0.01 -0.00 -0.01  
26 1 0.01 0.00 -0.00 0.00 0.00 0.03 0.01 -0.00 -0.01  
27 1 -0.00 -0.00 0.00 0.01 -0.00 0.03 0.00 0.00 0.08  
28 1 0.00 -0.01 -0.00 0.01 -0.00 -0.03 0.00 -0.00 0.07  
29 1 0.01 -0.01 0.01 -0.01 -0.02 -0.03 -0.02 0.01 -0.02  
30 1 0.02 -0.00 0.01 -0.01 -0.02 0.03 -0.02 0.01 -0.02  
31 1 0.00 0.00 -0.00 -0.01 0.00 0.04 0.00 -0.00 0.06  
32 1 -0.00 0.00 0.00 -0.00 0.00 -0.03 -0.00 -0.00 0.06  
33 29 0.00 -0.00 -0.00 0.00 -0.00 -0.00 -0.00 0.00 0.10  
34 6 -0.00 0.00 0.00 -0.00 -0.00 -0.09 -0.01 0.01 -0.01  
35 6 -0.00 -0.00 0.00 0.03 0.01 -0.12 0.04 0.00 -0.07  
36 6 0.00 0.00 0.00 -0.04 -0.01 -0.10 -0.07 0.01 -0.03  
37 6 -0.00 0.00 -0.00 0.02 0.01 -0.16 0.04 0.00 -0.14  
38 1 -0.00 -0.00 -0.00 0.06 0.01 -0.10 0.09 0.00 -0.06  
39 6 0.00 0.00 -0.00 -0.04 -0.00 -0.15 -0.08 0.01 -0.10  
40 1 0.00 -0.00 -0.00 -0.06 -0.01 -0.08 -0.11 0.01 0.01  
41 6 -0.00 0.00 -0.00 -0.01 0.00 -0.18 -0.02 0.01 -0.16  
42 1 -0.00 -0.00 -0.00 0.05 0.02 -0.18 0.08 0.00 -0.18  
43 1 0.00 -0.00 -0.00 -0.07 -0.01 -0.16 -0.12 0.01 -0.12  
44 1 0.00 -0.00 -0.00 -0.02 0.01 -0.21 -0.03 0.00 -0.21  
45 6 -0.00 0.00 0.00 0.00 -0.00 0.09 -0.01 0.00 -0.01  
46 6 0.00 0.00 0.00 -0.01 0.02 0.11 0.02 -0.03 -0.06  
47 6 -0.00 -0.00 0.00 0.02 -0.03 0.10 -0.04 0.04 -0.03  
48 6 -0.00 0.00 -0.00 -0.00 0.02 0.15 0.02 -0.03 -0.12  
49 1 0.00 0.00 -0.00 -0.02 0.05 0.10 0.05 -0.06 -0.05  
50 6 0.00 -0.00 -0.00 0.03 -0.03 0.14 -0.05 0.05 -0.09  
51 1 0.00 -0.00 -0.00 0.03 -0.05 0.08 -0.07 0.07 0.01  
52 6 -0.00 0.00 -0.00 0.01 -0.01 0.17 -0.02 0.01 -0.14  
53 1 0.00 0.00 -0.00 -0.01 0.04 0.17 0.04 -0.05 -0.16  
54 1 0.00 0.00 -0.00 0.04 -0.06 0.16 -0.08 0.08 -0.11  
55 1 0.00 0.00 -0.00 0.02 -0.01 0.20 -0.02 0.02 -0.19  
56 6 -0.00 0.00 -0.00 0.00 0.00 0.09 0.01 0.00 -0.01  
57 6 0.00 0.00 -0.00 -0.01 0.04 0.11 0.06 -0.04 -0.06  
58 6 -0.00 -0.00 0.00 0.02 -0.03 0.11 -0.04 0.05 -0.04  
59 6 -0.00 0.00 -0.00 -0.01 0.04 0.16 0.07 -0.03 -0.13  
60 1 0.00 0.00 -0.00 -0.03 0.06 0.09 0.09 -0.08 -0.04  
61 6 0.00 -0.00 -0.00 0.02 -0.03 0.15 -0.03 0.06 -0.12  
62 1 -0.00 0.00 0.00 0.04 -0.06 0.09 -0.08 0.08 -0.01  
63 6 -0.00 -0.00 -0.00 0.01 0.00 0.18 0.03 0.01 -0.16  
64 1 0.00 0.00 -0.00 -0.03 0.06 0.18 0.11 -0.07 -0.17

```

65 1 0.00 -0.00 -0.00 0.04 -0.06 0.17 -0.06 0.09 -0.14
66 1 0.00 -0.00 -0.00 0.01 0.00 0.21 0.04 0.02 -0.22
67 6 -0.00 0.00 -0.00 0.00 0.00 -0.08 0.00 -0.01 -0.01
68 6 -0.00 0.00 0.00 -0.03 -0.01 -0.10 -0.06 -0.01 -0.04
69 6 -0.00 -0.00 -0.00 0.03 0.01 -0.11 0.06 -0.01 -0.06
70 6 0.00 -0.00 0.00 -0.03 -0.01 -0.14 -0.05 -0.02 -0.11
71 1 -0.00 0.00 0.00 -0.06 -0.01 -0.08 -0.11 -0.01 -0.01
72 6 -0.00 0.00 -0.00 0.03 0.01 -0.15 0.07 -0.02 -0.13
73 1 -0.00 -0.00 -0.00 0.06 0.02 -0.09 0.11 -0.01 -0.04
74 6 0.00 0.00 -0.00 -0.00 0.00 -0.17 0.01 -0.03 -0.16
75 1 0.00 0.00 -0.00 -0.06 -0.01 -0.16 -0.10 -0.02 -0.13
76 1 -0.00 -0.00 -0.00 0.06 0.02 -0.17 0.12 -0.03 -0.16
77 1 0.00 -0.00 -0.00 -0.00 0.00 -0.20 0.01 -0.04 -0.21
78 1 -0.55 0.23 0.80 0.00 0.01 0.00 0.01 -0.01 0.08
79 1 -0.06 0.03 -0.01 0.03 -0.02 -0.00 0.03 -0.02 0.08
80 6 0.03 -0.02 -0.01 -0.01 0.00 -0.00 0.02 -0.02 0.09
81 8 -0.00 0.01 0.00 -0.06 0.01 -0.00 0.03 -0.02 0.09

```

TCO-INT2

-----  
Center Atomic Atomic Coordinates (Angstroms)

Number Number Type X Y Z  
-----

```

1 7 0 -1.859789 0.552935 -0.283684
2 7 0 0.624821 1.969906 -0.108911
3 7 0 2.047432 -0.524981 -0.095616
4 7 0 -0.440717 -1.940597 -0.230440
5 6 0 -2.943920 -0.294846 -0.300791
6 6 0 -4.166131 0.472467 -0.354167
7 6 0 -3.808749 1.789876 -0.360394
8 6 0 -2.364005 1.834607 -0.312723
9 6 0 -1.618145 3.017734 -0.233562
10 6 0 -0.220845 3.054939 -0.123401
11 6 0 0.547664 4.276745 -0.029444
12 6 0 1.859953 3.914688 0.051120
13 6 0 1.902965 2.470247 -0.015624
14 6 0 3.088361 1.721909 -0.003225
15 6 0 3.129861 0.322194 -0.068676
16 6 0 4.354519 -0.444628 -0.144532
17 6 0 3.995889 -1.758642 -0.206361
18 6 0 2.550201 -1.802795 -0.162529
19 6 0 1.802303 -2.989027 -0.184941
20 6 0 0.401197 -3.025765 -0.181909

```

21 6 0 -0.374439 -4.245767 -0.093084  
22 6 0 -1.687303 -3.880409 -0.088574  
23 6 0 -1.721174 -2.437419 -0.184259  
24 6 0 -2.903116 -1.690454 -0.220292  
25 1 0 -5.165362 0.046434 -0.376441  
26 1 0 -4.458702 2.659942 -0.383020  
27 1 0 0.128744 5.278900 -0.027489  
28 1 0 2.727633 4.561470 0.143259  
29 1 0 5.354936 -0.022011 -0.165509  
30 1 0 4.644496 -2.626007 -0.288172  
31 1 0 0.043111 -5.245921 -0.021671  
32 1 0 -2.563872 -4.518269 -0.017456  
33 29 0 0.095918 0.011740 -0.189318  
34 6 0 4.386700 2.457944 0.068468  
35 6 0 5.194809 2.370780 1.213273  
36 6 0 4.825495 3.245327 -1.008071  
37 6 0 6.410300 3.055347 1.281326  
38 1 0 4.858733 1.762445 2.055784  
39 6 0 6.041297 3.929377 -0.941313  
40 1 0 4.205892 3.312084 -1.904949  
41 6 0 6.837171 3.836880 0.204026  
42 1 0 7.025131 2.980394 2.181563  
43 1 0 6.370404 4.533984 -1.789953  
44 1 0 7.788254 4.372095 0.256574  
45 6 0 2.539029 -4.287951 -0.197498  
46 6 0 3.308226 -4.687962 0.907171  
47 6 0 2.472420 -5.135886 -1.314841  
48 6 0 3.993816 -5.904539 0.894835  
49 1 0 3.358024 -4.038030 1.783373  
50 6 0 3.159061 -6.351900 -1.328530  
51 1 0 1.879505 -4.829814 -2.179426  
52 6 0 3.921871 -6.739998 -0.223478  
53 1 0 4.583129 -6.203438 1.765130  
54 1 0 3.100582 -6.997596 -2.208130  
55 1 0 4.458416 -7.691735 -0.233404  
56 6 0 -2.360098 4.315058 -0.252499  
57 6 0 -2.986106 4.761969 -1.426722  
58 6 0 -2.450109 5.106844 0.903176  
59 6 0 -3.684760 5.971287 -1.445312  
60 1 0 -2.917246 4.152593 -2.330501  
61 6 0 -3.148344 6.316390 0.885667  
62 1 0 -1.969295 4.763565 1.821909  
63 6 0 -3.767880 6.752142 -0.289034  
64 1 0 -4.163553 6.306636 -2.368530

```

65 1 0 -3.212037 6.919072 1.794933
66 1 0 -4.314493 7.698050 -0.303224
67 6 0 -4.202849 -2.419245 -0.099371
68 6 0 -4.863069 -2.444609 1.139542
69 6 0 -4.774408 -3.080726 -1.195192
70 6 0 -6.078579 -3.119363 1.274233
71 1 0 -4.399488 -1.939175 1.989889
72 6 0 -5.991264 -3.754400 -1.058149
73 1 0 -4.259692 -3.061634 -2.158636
74 6 0 -6.645908 -3.774203 0.176590
75 1 0 -6.583480 -3.137239 2.243272
76 1 0 -6.429940 -4.264249 -1.919457
77 1 0 -7.597075 -4.301390 0.283749
78 1 0 -0.704636 0.364498 2.518850
79 1 0 -2.473330 1.006747 2.413873
80 6 0 -1.797964 0.134917 2.588066
81 8 0 -2.210287 -0.967314 2.838826

```

TCO-INT3

-----  
Center Atomic Atomic Coordinates (Angstroms)

Number Number Type X Y Z  
-----

```

1 7 0 1.946873 -0.255823 -0.297406
2 7 0 -0.384833 -1.972451 0.128974
3 7 0 -2.451145 0.274383 0.358538
4 7 0 0.079646 1.964800 0.056140
5 6 0 2.848024 0.750059 -0.473750
6 6 0 4.142537 0.167928 -0.786583
7 6 0 3.988668 -1.190224 -0.746191
8 6 0 2.593128 -1.448254 -0.428963
9 6 0 1.986653 -2.701130 -0.208322
10 6 0 0.611364 -2.917609 0.061188
11 6 0 0.029024 -4.240445 0.192322
12 6 0 -1.318648 -4.073304 0.305885
13 6 0 -1.586515 -2.646165 0.228589
14 6 0 -2.904833 -2.131167 0.120240
15 6 0 -3.264311 -0.769529 0.017836
16 6 0 -4.444643 -0.187435 -0.559688
17 6 0 -4.282129 1.184837 -0.563485
18 6 0 -2.998109 1.477634 0.011015
19 6 0 -2.328129 2.716602 0.112387
20 6 0 -0.923686 2.901522 0.210017

```

21 6 0 -0.321438 4.216650 0.351874  
22 6 0 1.027406 4.060848 0.229855  
23 6 0 1.273033 2.648186 0.005977  
24 6 0 2.556920 2.114358 -0.274620  
25 1 0 5.051533 0.726709 -0.991228  
26 1 0 4.750333 -1.948570 -0.905859  
27 1 0 0.582384 -5.174985 0.175636  
28 1 0 -2.071746 -4.847515 0.418215  
29 1 0 -5.271495 -0.754052 -0.979966  
30 1 0 -4.953871 1.926666 -0.987598  
31 1 0 -0.865628 5.139664 0.529429  
32 1 0 1.791589 4.830658 0.284347  
33 29 0 0.160968 -0.037346 0.486127  
34 6 0 -4.038101 -3.089968 -0.032651  
35 6 0 -5.125364 -3.042034 0.856809  
36 6 0 -4.074248 -4.018564 -1.087920  
37 6 0 -6.208971 -3.909856 0.708154  
38 1 0 -5.108214 -2.321567 1.677290  
39 6 0 -5.159775 -4.882650 -1.239791  
40 1 0 -3.247364 -4.047081 -1.800049  
41 6 0 -6.229079 -4.833818 -0.340245  
42 1 0 -7.040194 -3.865538 1.415961  
43 1 0 -5.174199 -5.593079 -2.069857  
44 1 0 -7.077706 -5.511681 -0.458884  
45 6 0 -3.200167 3.918390 -0.020802  
46 6 0 -4.288242 4.100526 0.850966  
47 6 0 -2.991129 4.865482 -1.039469  
48 6 0 -5.131567 5.205362 0.720544  
49 1 0 -4.460071 3.370514 1.644664  
50 6 0 -3.837127 5.967327 -1.172989  
51 1 0 -2.165577 4.720936 -1.738779  
52 6 0 -4.908104 6.143111 -0.291447  
53 1 0 -5.965132 5.336052 1.414779  
54 1 0 -3.663796 6.688843 -1.975042  
55 1 0 -5.568889 7.006966 -0.395607  
56 6 0 2.872259 -3.902943 -0.282994  
57 6 0 3.419689 -4.314705 -1.508245  
58 6 0 3.182124 -4.633888 0.874893  
59 6 0 4.255620 -5.431813 -1.574597  
60 1 0 3.178603 -3.753843 -2.413908  
61 6 0 4.017681 -5.750879 0.809056  
62 1 0 2.766416 -4.314053 1.832893  
63 6 0 4.556911 -6.153318 -0.416148  
64 1 0 4.670494 -5.741900 -2.536786



65 1 0 4.252966 -6.306046 1.720319  
 66 1 0 5.211283 -7.026737 -0.467732  
 67 6 0 3.710551 3.061138 -0.327400  
 68 6 0 4.732957 2.965061 0.632848  
 69 6 0 3.801102 4.046767 -1.323341  
 70 6 0 5.817900 3.844050 0.595783  
 71 1 0 4.662282 2.197994 1.408193  
 72 6 0 4.889316 4.921283 -1.359599  
 73 1 0 3.014043 4.117241 -2.077364  
 74 6 0 5.899901 4.823214 -0.398614  
 75 1 0 6.603118 3.763488 1.351475  
 76 1 0 4.950384 5.679441 -2.144255  
 77 1 0 6.750769 5.508322 -0.426171  
 78 1 0 -1.682408 0.187986 1.062973  
 79 1 0 -0.498402 0.067510 1.935027  
 80 6 0 2.707070 0.073128 2.601672  
 81 8 0 3.903165 0.187101 2.518949  
 82 1 0 2.006615 0.934280 2.485597  
 83 1 0 2.211554 -0.909359 2.798951

TCO-TS3

-----  
 Center Atomic Atomic Coordinates (Angstroms)

Number Number Type X Y Z

-----  
 1 7 0 -2.058105 0.225449 -0.528882  
 2 7 0 0.225414 1.995883 0.044641  
 3 7 0 2.361960 -0.195764 0.321536  
 4 7 0 -0.082844 -1.938768 -0.142101  
 5 6 0 -2.942105 -0.807594 -0.495798  
 6 6 0 -4.294901 -0.272821 -0.562494  
 7 6 0 -4.180050 1.088573 -0.593673  
 8 6 0 -2.754796 1.390528 -0.531073  
 9 6 0 -2.172071 2.659676 -0.326643  
 10 6 0 -0.804203 2.910227 -0.051083  
 11 6 0 -0.269263 4.245676 0.125338  
 12 6 0 1.074433 4.121231 0.315710  
 13 6 0 1.395320 2.708534 0.231500  
 14 6 0 2.735315 2.242148 0.208646  
 15 6 0 3.152083 0.901556 0.084423  
 16 6 0 4.378502 0.396161 -0.461764  
 17 6 0 4.267722 -0.977126 -0.567643  
 18 6 0 2.973139 -1.357929 -0.083396

19 6 0 2.347117 -2.619137 -0.113719  
20 6 0 0.948760 -2.853191 -0.056821  
21 6 0 0.387168 -4.189435 0.024005  
22 6 0 -0.968752 -4.061872 -0.022708  
23 6 0 -1.259697 -2.647634 -0.140648  
24 6 0 -2.577800 -2.149699 -0.282430  
25 1 0 -5.206696 -0.864128 -0.549315  
26 1 0 -4.981217 1.822804 -0.609866  
27 1 0 -0.848818 5.163222 0.090701  
28 1 0 1.792214 4.917458 0.487827  
29 1 0 5.200710 1.018558 -0.804808  
30 1 0 4.985763 -1.662951 -1.009375  
31 1 0 0.963112 -5.104888 0.121141  
32 1 0 -1.712919 -4.852247 0.007502  
33 29 0 -0.206432 0.043262 0.125096  
34 6 0 3.841764 3.243729 0.163929  
35 6 0 4.854429 3.217222 1.137813  
36 6 0 3.929660 4.191297 -0.870986  
37 6 0 5.915029 4.124244 1.090830  
38 1 0 4.797723 2.481153 1.942624  
39 6 0 4.992192 5.095011 -0.921055  
40 1 0 3.162009 4.204359 -1.647077  
41 6 0 5.986486 5.066983 0.061638  
42 1 0 6.687766 4.095546 1.862786  
43 1 0 5.048055 5.820357 -1.736325  
44 1 0 6.817076 5.775711 0.022568  
45 6 0 3.258546 -3.780171 -0.319942  
46 6 0 4.333076 -4.003479 0.558723  
47 6 0 3.093642 -4.649315 -1.413352  
48 6 0 5.208905 -5.072169 0.359259  
49 1 0 4.468459 -3.336269 1.412482  
50 6 0 3.971607 -5.715080 -1.615023  
51 1 0 2.275667 -4.472841 -2.114311  
52 6 0 5.030597 -5.931940 -0.728095  
53 1 0 6.031645 -5.236705 1.059173  
54 1 0 3.832205 -6.376128 -2.473769  
55 1 0 5.716345 -6.767776 -0.885672  
56 6 0 -3.101275 3.828877 -0.357306  
57 6 0 -3.763258 4.177571 -1.545643  
58 6 0 -3.354547 4.581863 0.801150  
59 6 0 -4.649301 5.256736 -1.577579  
60 1 0 -3.571746 3.596770 -2.450539  
61 6 0 -4.241712 5.659560 0.770133  
62 1 0 -2.856224 4.307415 1.733326

63 6 0 -4.890827 6.001478 -0.419876  
 64 1 0 -5.151378 5.518290 -2.512217  
 65 1 0 -4.432000 6.231010 1.681861  
 66 1 0 -5.585147 6.844726 -0.443991  
 67 6 0 -3.690597 -3.122580 -0.072502  
 68 6 0 -3.925989 -3.600343 1.227888  
 69 6 0 -4.516728 -3.544760 -1.123201  
 70 6 0 -4.970606 -4.496203 1.464007  
 71 1 0 -3.285967 -3.239543 2.036297  
 72 6 0 -5.559786 -4.443447 -0.882233  
 73 1 0 -4.332819 -3.171058 -2.133257  
 74 6 0 -5.787856 -4.921261 0.411293  
 75 1 0 -5.151350 -4.860799 2.478286  
 76 1 0 -6.194705 -4.772970 -1.708433  
 77 1 0 -6.603988 -5.623266 0.599320  
 78 1 0 1.572465 -0.185597 0.978971  
 79 1 0 0.081479 -0.172466 1.746135  
 80 6 0 -0.988776 -0.463769 2.836367  
 81 8 0 -1.698971 -1.445835 2.573711  
 82 1 0 -0.144509 -0.540323 3.569954  
 83 1 0 -1.383429 0.579507 2.748391

\*\*\*\*\* 1 imaginary frequencies (negative Signs) \*\*\*\*\*

Diagonal vibrational polarizability:

76.4471760 107.4372340 97.3500022

Harmonic frequencies (cm<sup>-1</sup>), IR intensities (KM/Mole), Raman scattering activities (A<sup>4</sup>/AMU), depolarization ratios for plane and unpolarized incident light, reduced masses (AMU), force constants (mDyne/A), and normal coordinates:

1 2 3

A A A

Frequencies -- -585.4857 13.9306 24.8941

Red. masses -- 1.3681 6.1101 7.9648

Frc consts -- 0.2763 0.0007 0.0029

IR Inten -- 204.0537 0.0490 2.8801

Atom AN X Y Z X Y Z X Y Z

1 7 0.01 -0.00 -0.00 0.00 0.01 -0.01 0.02 -0.02 -0.01  
 2 7 -0.00 0.01 -0.02 0.00 0.00 -0.00 0.01 -0.01 0.01  
 3 7 0.01 -0.00 -0.00 0.00 0.01 -0.00 0.01 -0.01 0.02  
 4 7 -0.01 -0.01 -0.02 0.00 0.00 -0.01 0.01 -0.01 0.03  
 5 6 0.00 -0.00 -0.00 0.00 0.01 -0.03 0.02 -0.02 -0.01  
 6 6 0.00 -0.00 0.00 0.00 0.00 -0.02 0.02 -0.02 -0.01  
 7 6 0.00 0.00 -0.00 -0.00 0.00 0.01 0.02 -0.02 -0.01  
 8 6 0.00 0.00 -0.00 -0.00 0.01 0.02 0.02 -0.02 -0.00  
 9 6 -0.00 0.00 -0.00 -0.00 0.00 0.04 0.01 -0.02 0.00

10 6 -0.00 0.01 -0.01 0.00 0.00 0.02 0.01 -0.01 0.01  
11 6 0.00 0.00 0.00 0.00 0.00 0.02 0.00 -0.01 0.01  
12 6 -0.00 0.00 0.00 0.01 0.00 -0.01 0.00 -0.01 0.01  
13 6 -0.00 -0.00 -0.01 0.01 0.00 -0.02 0.01 -0.01 0.01  
14 6 -0.00 -0.00 -0.00 0.01 0.00 -0.04 0.01 -0.01 0.01  
15 6 0.00 -0.01 -0.00 0.00 0.00 -0.02 0.01 -0.01 0.01  
16 6 0.01 -0.00 -0.00 0.00 -0.01 -0.01 0.00 -0.01 -0.00  
17 6 0.01 -0.00 -0.00 0.00 -0.02 0.02 0.01 -0.01 -0.00  
18 6 0.00 0.01 -0.00 0.00 -0.00 0.02 0.01 -0.01 0.01  
19 6 0.00 0.00 -0.00 0.00 -0.00 0.04 0.01 -0.01 0.01  
20 6 -0.00 0.00 -0.00 -0.00 -0.00 0.02 0.01 -0.01 0.03  
21 6 0.00 0.00 0.00 -0.00 0.00 0.01 0.02 -0.01 0.03  
22 6 -0.00 -0.00 0.00 -0.00 0.00 -0.02 0.02 -0.01 0.03  
23 6 -0.00 -0.01 -0.01 0.00 0.00 -0.03 0.01 -0.02 0.03  
24 6 -0.00 -0.00 -0.01 0.00 0.00 -0.05 0.02 -0.02 0.01  
25 1 0.00 -0.00 -0.00 0.00 0.00 -0.04 0.02 -0.02 -0.02  
26 1 0.01 0.00 -0.00 -0.00 0.00 0.03 0.02 -0.02 -0.01  
27 1 0.00 0.01 0.01 0.00 0.00 0.04 0.00 -0.01 0.01  
28 1 0.00 -0.00 0.01 0.01 0.00 -0.03 0.00 -0.01 0.01  
29 1 0.01 -0.00 -0.00 0.00 -0.02 -0.03 -0.00 -0.00 -0.01  
30 1 0.01 0.00 -0.00 0.00 -0.03 0.03 0.00 -0.00 -0.01  
31 1 0.00 0.00 0.00 -0.01 0.00 0.03 0.02 -0.01 0.02  
32 1 0.00 -0.01 0.00 -0.00 0.00 -0.03 0.02 -0.02 0.03  
33 29 -0.00 0.00 0.01 0.00 0.00 -0.01 0.00 -0.01 0.03  
34 6 -0.00 -0.00 0.00 0.00 0.00 -0.08 0.01 -0.01 0.00  
35 6 -0.00 -0.00 -0.00 0.03 0.02 -0.11 0.01 -0.01 -0.00  
36 6 -0.00 -0.00 0.00 -0.03 -0.01 -0.10 0.00 -0.01 0.01  
37 6 -0.00 -0.00 -0.00 0.03 0.02 -0.15 0.01 -0.01 -0.01  
38 1 -0.00 -0.00 -0.00 0.05 0.03 -0.10 0.02 -0.01 -0.00  
39 6 -0.00 -0.00 0.00 -0.03 -0.01 -0.14 0.00 -0.01 0.00  
40 1 -0.00 -0.00 0.00 -0.05 -0.02 -0.08 -0.00 -0.00 0.01  
41 6 -0.00 -0.00 0.00 -0.00 0.01 -0.17 0.01 -0.01 -0.00  
42 1 -0.00 -0.00 -0.00 0.05 0.03 -0.17 0.02 -0.02 -0.01  
43 1 -0.00 -0.00 -0.00 -0.05 -0.02 -0.15 -0.00 -0.00 0.00  
44 1 0.00 -0.00 -0.00 -0.00 0.01 -0.20 0.01 -0.01 -0.01  
45 6 -0.00 0.00 0.00 0.01 -0.01 0.09 0.01 -0.01 -0.02  
46 6 -0.00 0.00 -0.00 -0.02 0.01 0.12 0.03 -0.01 -0.04  
47 6 -0.00 0.00 0.00 0.03 -0.03 0.10 -0.01 0.00 -0.02  
48 6 -0.00 0.00 -0.00 -0.01 0.01 0.17 0.03 -0.01 -0.07  
49 1 0.00 0.00 -0.00 -0.04 0.03 0.11 0.05 -0.02 -0.04  
50 6 -0.00 0.00 0.00 0.04 -0.04 0.15 -0.01 0.01 -0.05  
51 1 0.00 0.00 -0.00 0.05 -0.05 0.08 -0.02 0.01 -0.00  
52 6 -0.00 0.00 0.00 0.02 -0.02 0.18 0.01 0.00 -0.08  
53 1 -0.00 0.00 -0.00 -0.03 0.02 0.19 0.05 -0.01 -0.09

54 1 -0.00 0.00 -0.00 0.06 -0.06 0.16 -0.03 0.02 -0.05  
 55 1 0.00 0.00 -0.00 0.02 -0.02 0.22 0.01 0.01 -0.10  
 56 6 -0.00 0.00 0.00 -0.01 0.00 0.09 0.00 -0.02 0.01  
 57 6 -0.00 0.00 0.00 -0.03 0.03 0.11 0.01 -0.01 0.01  
 58 6 -0.00 0.00 -0.00 0.02 -0.03 0.12 -0.00 -0.03 0.01  
 59 6 -0.00 0.00 0.00 -0.04 0.03 0.17 -0.00 -0.02 0.02  
 60 1 0.00 0.00 0.00 -0.05 0.06 0.09 0.01 -0.01 0.00  
 61 6 -0.00 0.00 0.00 0.02 -0.03 0.17 -0.01 -0.04 0.02  
 62 1 0.00 0.00 -0.00 0.04 -0.06 0.10 -0.00 -0.04 0.01  
 63 6 -0.00 0.00 0.00 -0.01 0.00 0.19 -0.01 -0.03 0.02  
 64 1 -0.00 0.00 -0.00 -0.06 0.06 0.18 0.00 -0.01 0.02  
 65 1 0.00 0.00 -0.00 0.04 -0.06 0.19 -0.01 -0.05 0.03  
 66 1 -0.00 0.00 -0.00 -0.01 -0.00 0.23 -0.01 -0.04 0.03  
 67 6 -0.00 -0.00 -0.00 0.00 0.00 -0.08 0.02 -0.02 0.01  
 68 6 -0.00 -0.00 -0.00 -0.03 -0.00 -0.09 0.00 -0.01 0.01  
 69 6 -0.00 -0.00 -0.00 0.03 0.00 -0.11 0.03 -0.03 0.00  
 70 6 -0.00 -0.00 -0.00 -0.04 -0.01 -0.12 0.01 -0.01 0.00  
 71 1 -0.00 -0.01 -0.00 -0.06 -0.01 -0.07 -0.01 0.00 0.01  
 72 6 -0.00 -0.00 0.00 0.02 0.00 -0.14 0.03 -0.03 -0.00  
 73 1 0.00 -0.00 0.00 0.06 0.01 -0.10 0.04 -0.03 -0.00  
 74 6 -0.00 -0.00 -0.00 -0.01 -0.00 -0.14 0.02 -0.02 -0.00  
 75 1 -0.00 -0.00 -0.00 -0.07 -0.01 -0.13 -0.00 -0.00 0.01  
 76 1 -0.00 -0.00 0.00 0.05 0.00 -0.16 0.04 -0.04 -0.01  
 77 1 -0.00 -0.00 -0.00 -0.02 -0.00 -0.17 0.02 -0.02 -0.00  
 78 1 -0.05 0.01 -0.01 0.00 0.02 -0.00 0.01 -0.01 0.02  
 79 1 0.81 0.26 -0.39 -0.01 -0.00 -0.01 0.02 0.02 0.02  
 80 6 -0.12 -0.05 0.11 -0.03 0.00 -0.02 -0.01 0.13 0.03  
 81 8 0.02 0.02 0.00 -0.04 0.01 -0.04 -0.41 0.47 -0.16  
 82 1 0.07 -0.03 -0.12 -0.04 -0.01 -0.02 0.00 -0.38 -0.04  
 83 1 0.09 -0.02 -0.24 -0.01 0.01 -0.02 0.38 0.30 0.30

TCO-INT4

-----  
 Center Atomic Atomic Coordinates (Angstroms)

Number Number Type X Y Z

-----  
 1 7 0 -0.276075 2.153913 -0.056800  
 2 7 0 1.941099 0.279035 -0.161303  
 3 7 0 0.212377 -2.196939 -0.690413  
 4 7 0 -2.005770 -0.195936 -0.172113  
 5 6 0 -1.467810 2.817216 -0.063402  
 6 6 0 -1.218333 4.245899 0.010298  
 7 6 0 0.138466 4.410175 0.038735

8 6 0 0.722774 3.082484 -0.022306  
9 6 0 2.095655 2.776416 -0.073497  
10 6 0 2.626258 1.474021 -0.203836  
11 6 0 4.028225 1.224517 -0.471739  
12 6 0 4.177348 -0.125225 -0.579441  
13 6 0 2.867960 -0.717343 -0.377940  
14 6 0 2.670601 -2.119034 -0.419420  
15 6 0 1.429853 -2.776635 -0.443215  
16 6 0 1.157291 -4.132965 -0.058070  
17 6 0 -0.207510 -4.295429 -0.011385  
18 6 0 -0.815888 -3.046714 -0.373113  
19 6 0 -2.172905 -2.701496 -0.300103  
20 6 0 -2.687714 -1.381629 -0.302229  
21 6 0 -4.105298 -1.116957 -0.485430  
22 6 0 -4.263480 0.234544 -0.454724  
23 6 0 -2.945995 0.806242 -0.241007  
24 6 0 -2.729094 2.198342 -0.144915  
25 1 0 -1.981941 5.018198 0.040476  
26 1 0 0.693815 5.342103 0.097526  
27 1 0 4.788193 1.990455 -0.596465  
28 1 0 5.082004 -0.676837 -0.818080  
29 1 0 1.918891 -4.854079 0.223774  
30 1 0 -0.757565 -5.173875 0.313022  
31 1 0 -4.866155 -1.872114 -0.660682  
32 1 0 -5.180451 0.801203 -0.588097  
33 29 0 -0.028936 0.282162 0.534187  
34 6 0 3.870679 -2.998036 -0.338015  
35 6 0 4.773098 -2.879621 0.734060  
36 6 0 4.107642 -3.984919 -1.310264  
37 6 0 5.884020 -3.719179 0.826047  
38 1 0 4.584211 -2.129394 1.504293  
39 6 0 5.220769 -4.822856 -1.219899  
40 1 0 3.414554 -4.082370 -2.148559  
41 6 0 6.112809 -4.692315 -0.151648  
42 1 0 6.570817 -3.618304 1.669862  
43 1 0 5.394857 -5.578252 -1.989991  
44 1 0 6.983222 -5.348809 -0.079843  
45 6 0 -3.131521 -3.830049 -0.142799  
46 6 0 -4.006832 -3.877424 0.956995  
47 6 0 -3.164297 -4.883039 -1.073531  
48 6 0 -4.892206 -4.944187 1.116825  
49 1 0 -3.973459 -3.073866 1.695164  
50 6 0 -4.052105 -5.948814 -0.914876  
51 1 0 -2.493873 -4.852103 -1.935005

52 6 0 -4.919245 -5.982696 0.180881  
53 1 0 -5.559765 -4.968739 1.981523  
54 1 0 -4.070526 -6.753789 -1.653590  
55 1 0 -5.613447 -6.817071 0.306197  
56 6 0 3.061113 3.914652 -0.037608  
57 6 0 3.098627 4.863786 -1.072319  
58 6 0 3.955092 4.054461 1.036845  
59 6 0 4.004821 5.925681 -1.032856  
60 1 0 2.416443 4.755645 -1.918150  
61 6 0 4.859851 5.117233 1.077838  
62 1 0 3.929879 3.322321 1.846783  
63 6 0 4.887478 6.056498 0.043029  
64 1 0 4.025131 6.651357 -1.849602  
65 1 0 5.544267 5.213913 1.924154  
66 1 0 5.596057 6.887587 0.074222  
67 6 0 -3.928617 3.088762 -0.152408  
68 6 0 -4.839001 3.066606 0.916872  
69 6 0 -4.167529 3.965968 -1.222681  
70 6 0 -5.958460 3.901306 0.916731  
71 1 0 -4.656993 2.390360 1.754846  
72 6 0 -5.288314 4.799362 -1.224404  
73 1 0 -3.469508 3.982715 -2.062426  
74 6 0 -6.186799 4.770228 -0.154148  
75 1 0 -6.653912 3.875160 1.759169  
76 1 0 -5.462832 5.471301 -2.068293  
77 1 0 -7.063271 5.422603 -0.154934  
78 1 0 0.081239 -1.251556 -1.027343  
79 1 0 0.848971 -1.577297 3.663479  
80 6 0 1.118603 -1.277722 2.626981  
81 8 0 -0.021822 -0.951575 1.924457  
82 1 0 1.852409 -0.445344 2.725409  
83 1 0 1.670575 -2.142425 2.195029

TCO-TS4

-----  
Center Atomic Atomic Coordinates (Angstroms)

Number Number Type X Y Z  
-----

1 7 0 0.050181 2.205698 -0.078778  
2 7 0 1.948844 -0.009925 -0.015703  
3 7 0 -0.108567 -2.229611 -0.436934  
4 7 0 -1.988982 0.091794 -0.030805  
5 6 0 -1.038304 3.021806 -0.141170

6 6 0 -0.579006 4.397632 -0.213190  
7 6 0 0.790100 4.364069 -0.199882  
8 6 0 1.178499 2.967238 -0.122121  
9 6 0 2.486352 2.440577 -0.086102  
10 6 0 2.814102 1.062779 -0.077642  
11 6 0 4.170535 0.580093 -0.237848  
12 6 0 4.106796 -0.779995 -0.279427  
13 6 0 2.708311 -1.155635 -0.154848  
14 6 0 2.313651 -2.517713 -0.287748  
15 6 0 1.007510 -3.014475 -0.440109  
16 6 0 0.529792 -4.370409 -0.548370  
17 6 0 -0.849763 -4.338777 -0.526215  
18 6 0 -1.258488 -2.962781 -0.407087  
19 6 0 -2.526731 -2.389634 -0.219584  
20 6 0 -2.826084 -1.001189 -0.102308  
21 6 0 -4.205292 -0.540720 -0.191542  
22 6 0 -4.178774 0.819442 -0.193687  
23 6 0 -2.784772 1.213154 -0.089597  
24 6 0 -2.373251 2.568026 -0.117201  
25 1 0 -1.219371 5.274175 -0.261393  
26 1 0 1.473350 5.208270 -0.234125  
27 1 0 5.050730 1.206669 -0.348538  
28 1 0 4.926733 -1.474185 -0.437191  
29 1 0 1.163584 -5.250084 -0.616216  
30 1 0 -1.525219 -5.188388 -0.574227  
31 1 0 -5.073605 -1.184407 -0.296208  
32 1 0 -5.019632 1.499841 -0.291371  
33 29 0 0.020663 0.416560 0.624739  
34 6 0 3.395711 -3.548306 -0.269488  
35 6 0 4.161951 -3.747808 0.890813  
36 6 0 3.655007 -4.346209 -1.395203  
37 6 0 5.162836 -4.720410 0.923970  
38 1 0 3.959828 -3.133240 1.770611  
39 6 0 4.657350 -5.318638 -1.362738  
40 1 0 3.071477 -4.189324 -2.305048  
41 6 0 5.413615 -5.509087 -0.202900  
42 1 0 5.747098 -4.865977 1.835773  
43 1 0 4.852253 -5.926142 -2.249873  
44 1 0 6.197518 -6.269724 -0.177423  
45 6 0 -3.667837 -3.351275 -0.153189  
46 6 0 -4.414259 -3.483020 1.029595  
47 6 0 -4.004389 -4.151803 -1.256630  
48 6 0 -5.471370 -4.391649 1.105518  
49 1 0 -4.151530 -2.867839 1.892764



50 6 0 -5.062829 -5.060256 -1.180894  
 51 1 0 -3.437339 -4.046192 -2.184143  
 52 6 0 -5.799078 -5.183263 0.000644  
 53 1 0 -6.039610 -4.485084 2.034160  
 54 1 0 -5.317361 -5.669907 -2.051322  
 55 1 0 -6.627149 -5.893561 0.060141  
 56 6 0 3.615550 3.417564 -0.103927  
 57 6 0 3.836226 4.243462 -1.218234  
 58 6 0 4.477796 3.529715 0.999176  
 59 6 0 4.891242 5.158514 -1.228915  
 60 1 0 3.178443 4.153917 -2.085348  
 61 6 0 5.531870 4.445470 0.989368  
 62 1 0 4.310113 2.893812 1.871072  
 63 6 0 5.741814 5.263090 -0.124753  
 64 1 0 5.052878 5.788844 -2.106766  
 65 1 0 6.190142 4.523214 1.858071  
 66 1 0 6.567012 5.979130 -0.132955  
 67 6 0 -3.440546 3.613427 -0.149091  
 68 6 0 -4.276448 3.812988 0.961605  
 69 6 0 -3.622979 4.419719 -1.284088  
 70 6 0 -5.269423 4.794529 0.938010  
 71 1 0 -4.136964 3.192586 1.849487  
 72 6 0 -4.616950 5.400677 -1.308507  
 73 1 0 -2.983268 4.264193 -2.155490  
 74 6 0 -5.442812 5.591508 -0.197203  
 75 1 0 -5.908477 4.939745 1.812393  
 76 1 0 -4.749939 6.015325 -2.202158  
 77 1 0 -6.220255 6.358967 -0.216000  
 78 1 0 -0.102042 -1.341414 0.037489  
 79 1 0 0.542373 -1.597922 3.747746  
 80 6 0 0.865696 -1.377153 2.708290  
 81 8 0 -0.183985 -0.815185 2.006460  
 82 1 0 1.763495 -0.725598 2.788924  
 83 1 0 1.209474 -2.345797 2.280287

\*\*\*\*\* 1 imaginary frequencies (negative Signs) \*\*\*\*\*

Diagonal vibrational polarizability:

20.8432772 25.6343154 67.2658063

Harmonic frequencies (cm<sup>-1</sup>), IR intensities (KM/Mole), Raman scattering  
 activities (A<sup>4</sup>/AMU), depolarization ratios for plane and unpolarized  
 incident light, reduced masses (AMU), force constants (mDyne/A),  
 and normal coordinates:

1 2 3

A A A

Frequencies -- -71.7778 11.9334 27.5563

Red. masses -- 14.7637 6.0938 5.5618

Frc consts -- 0.0448 0.0005 0.0025

IR Inten -- 1.3807 0.0009 0.5509

Atom AN X Y Z X Y Z X Y Z

|    |    |       |       |       |       |       |       |       |       |       |
|----|----|-------|-------|-------|-------|-------|-------|-------|-------|-------|
| 1  | 7  | 0.00  | -0.01 | -0.05 | 0.01  | 0.00  | -0.00 | 0.00  | -0.01 | -0.07 |
| 2  | 7  | 0.02  | 0.02  | 0.01  | -0.00 | -0.00 | 0.00  | 0.00  | 0.00  | -0.08 |
| 3  | 7  | -0.09 | 0.17  | 0.11  | -0.00 | -0.00 | -0.00 | -0.00 | 0.01  | -0.07 |
| 4  | 7  | -0.04 | -0.00 | 0.01  | -0.00 | 0.00  | -0.01 | -0.00 | -0.00 | -0.08 |
| 5  | 6  | 0.00  | 0.00  | -0.05 | 0.01  | 0.00  | 0.02  | 0.01  | -0.01 | -0.05 |
| 6  | 6  | -0.00 | 0.00  | -0.07 | 0.01  | 0.00  | 0.02  | 0.01  | -0.01 | -0.01 |
| 7  | 6  | -0.00 | 0.00  | -0.07 | 0.01  | 0.01  | -0.02 | 0.01  | -0.02 | -0.01 |
| 8  | 6  | -0.01 | -0.01 | -0.06 | 0.01  | 0.00  | -0.02 | 0.00  | -0.01 | -0.05 |
| 9  | 6  | -0.01 | 0.01  | -0.04 | 0.00  | 0.00  | -0.04 | 0.00  | -0.00 | -0.05 |
| 10 | 6  | -0.00 | 0.02  | -0.03 | 0.00  | -0.00 | -0.02 | 0.00  | 0.00  | -0.07 |
| 11 | 6  | -0.01 | 0.04  | -0.04 | 0.00  | -0.01 | -0.02 | 0.00  | 0.00  | -0.09 |
| 12 | 6  | 0.01  | 0.05  | -0.02 | 0.00  | -0.01 | 0.02  | 0.00  | 0.00  | -0.09 |
| 13 | 6  | 0.02  | 0.05  | 0.01  | -0.00 | -0.01 | 0.03  | 0.00  | 0.00  | -0.07 |
| 14 | 6  | -0.01 | 0.05  | 0.01  | -0.01 | -0.00 | 0.05  | -0.00 | 0.01  | -0.05 |
| 15 | 6  | -0.06 | 0.11  | 0.00  | -0.01 | -0.00 | 0.02  | -0.01 | 0.01  | -0.05 |
| 16 | 6  | -0.04 | 0.07  | -0.14 | -0.02 | -0.01 | 0.02  | -0.01 | 0.03  | -0.02 |
| 17 | 6  | -0.03 | 0.07  | -0.14 | -0.02 | -0.01 | -0.02 | -0.01 | 0.03  | -0.02 |
| 18 | 6  | -0.06 | 0.12  | 0.00  | -0.01 | -0.01 | -0.03 | -0.01 | 0.01  | -0.05 |
| 19 | 6  | -0.04 | 0.04  | 0.01  | -0.01 | -0.00 | -0.05 | -0.01 | 0.01  | -0.05 |
| 20 | 6  | -0.06 | 0.01  | 0.01  | -0.00 | 0.00  | -0.03 | -0.00 | 0.00  | -0.07 |
| 21 | 6  | -0.05 | 0.02  | -0.01 | -0.01 | 0.01  | -0.02 | -0.00 | 0.00  | -0.09 |
| 22 | 6  | -0.04 | 0.03  | -0.03 | -0.00 | 0.01  | 0.02  | -0.00 | 0.00  | -0.09 |
| 23 | 6  | -0.02 | 0.02  | -0.02 | -0.00 | 0.00  | 0.02  | -0.00 | 0.00  | -0.07 |
| 24 | 6  | -0.01 | 0.02  | -0.04 | 0.00  | 0.00  | 0.04  | 0.00  | -0.00 | -0.05 |
| 25 | 1  | -0.00 | 0.00  | -0.08 | 0.01  | 0.00  | 0.03  | 0.01  | -0.02 | 0.01  |
| 26 | 1  | 0.00  | 0.00  | -0.09 | 0.01  | 0.01  | -0.03 | 0.01  | -0.02 | 0.01  |
| 27 | 1  | -0.02 | 0.05  | -0.07 | 0.00  | -0.01 | -0.03 | -0.00 | 0.00  | -0.09 |
| 28 | 1  | 0.02  | 0.06  | -0.02 | 0.00  | -0.01 | 0.04  | 0.00  | 0.00  | -0.09 |
| 29 | 1  | -0.02 | 0.03  | -0.25 | -0.03 | -0.01 | 0.03  | -0.02 | 0.03  | 0.00  |
| 30 | 1  | -0.02 | 0.03  | -0.25 | -0.02 | -0.01 | -0.04 | -0.02 | 0.03  | 0.00  |
| 31 | 1  | -0.06 | 0.02  | -0.01 | -0.01 | 0.01  | -0.04 | -0.00 | 0.00  | -0.09 |
| 32 | 1  | -0.03 | 0.05  | -0.06 | -0.00 | 0.01  | 0.03  | -0.00 | 0.00  | -0.09 |
| 33 | 29 | 0.09  | -0.23 | 0.31  | -0.00 | 0.00  | -0.00 | 0.01  | -0.02 | -0.05 |
| 34 | 6  | -0.02 | 0.02  | -0.01 | -0.01 | 0.00  | 0.09  | -0.00 | 0.02  | 0.01  |
| 35 | 6  | -0.03 | 0.03  | -0.03 | 0.02  | -0.01 | 0.12  | 0.03  | -0.03 | 0.07  |
| 36 | 6  | -0.01 | -0.00 | -0.00 | -0.04 | 0.02  | 0.10  | -0.04 | 0.07  | 0.01  |
| 37 | 6  | -0.03 | 0.02  | -0.04 | 0.02  | -0.00 | 0.16  | 0.02  | -0.02 | 0.14  |
| 38 | 1  | -0.03 | 0.05  | -0.03 | 0.04  | -0.03 | 0.11  | 0.06  | -0.07 | 0.07  |
| 39 | 6  | -0.01 | -0.01 | -0.02 | -0.04 | 0.03  | 0.14  | -0.04 | 0.08  | 0.08  |
| 40 | 1  | -0.00 | -0.01 | 0.01  | -0.06 | 0.04  | 0.08  | -0.06 | 0.11  | -0.04 |

41 6 -0.02 -0.01 -0.03 -0.01 0.02 0.17 -0.01 0.04 0.14  
42 1 -0.04 0.02 -0.05 0.04 -0.01 0.18 0.05 -0.05 0.19  
43 1 -0.01 -0.03 -0.01 -0.06 0.05 0.15 -0.07 0.12 0.08  
44 1 -0.03 -0.02 -0.04 -0.02 0.02 0.20 -0.02 0.04 0.20  
45 6 -0.01 0.03 -0.01 -0.00 -0.01 -0.09 -0.01 0.01 0.01  
46 6 -0.01 0.04 -0.03 0.00 0.02 -0.12 0.00 -0.04 0.07  
47 6 0.01 0.01 -0.00 -0.00 -0.04 -0.10 -0.03 0.07 0.01  
48 6 0.00 0.03 -0.03 0.01 0.02 -0.16 -0.00 -0.03 0.14  
49 1 -0.03 0.06 -0.03 0.00 0.05 -0.11 0.02 -0.09 0.07  
50 6 0.02 0.00 -0.01 0.00 -0.05 -0.14 -0.04 0.08 0.08  
51 1 0.01 -0.00 0.01 -0.00 -0.06 -0.08 -0.04 0.12 -0.04  
52 6 0.02 0.01 -0.02 0.01 -0.02 -0.17 -0.02 0.03 0.14  
53 1 0.00 0.05 -0.05 0.01 0.04 -0.18 0.01 -0.07 0.19  
54 1 0.03 -0.01 -0.01 0.00 -0.07 -0.15 -0.05 0.13 0.08  
55 1 0.03 0.01 -0.03 0.01 -0.02 -0.20 -0.03 0.04 0.20  
56 6 -0.02 0.01 -0.03 0.00 0.00 -0.09 0.01 -0.01 0.01  
57 6 -0.01 -0.00 -0.02 0.01 0.04 -0.11 0.03 -0.07 0.05  
58 6 -0.02 0.03 -0.03 -0.01 -0.03 -0.11 -0.00 0.05 0.04  
59 6 -0.00 -0.00 -0.01 0.01 0.04 -0.15 0.04 -0.08 0.12  
60 1 -0.01 -0.01 -0.03 0.02 0.07 -0.09 0.04 -0.12 0.03  
61 6 -0.01 0.02 -0.01 -0.00 -0.03 -0.15 0.01 0.05 0.10  
62 1 -0.03 0.04 -0.03 -0.01 -0.06 -0.09 -0.02 0.10 0.01  
63 6 -0.01 0.01 -0.00 0.01 0.00 -0.17 0.03 -0.02 0.14  
64 1 0.00 -0.02 0.00 0.02 0.07 -0.17 0.05 -0.13 0.15  
65 1 -0.02 0.03 -0.01 -0.01 -0.06 -0.17 -0.00 0.09 0.12  
66 1 -0.00 0.01 0.01 0.01 0.00 -0.21 0.04 -0.02 0.19  
67 6 -0.01 0.02 -0.03 0.00 -0.00 0.09 0.00 -0.01 0.01  
68 6 -0.02 0.03 -0.02 -0.03 0.01 0.11 -0.04 0.03 0.04  
69 6 0.00 0.01 -0.02 0.04 -0.01 0.11 0.04 -0.06 0.05  
70 6 -0.02 0.03 -0.00 -0.03 0.01 0.15 -0.04 0.02 0.10  
71 1 -0.02 0.04 -0.03 -0.06 0.02 0.09 -0.07 0.07 0.01  
72 6 0.00 0.01 -0.00 0.04 -0.01 0.15 0.04 -0.08 0.11  
73 1 0.01 0.00 -0.02 0.07 -0.02 0.09 0.07 -0.09 0.03  
74 6 -0.01 0.01 0.00 0.01 -0.00 0.17 -0.00 -0.04 0.14  
75 1 -0.02 0.03 0.00 -0.06 0.02 0.17 -0.07 0.05 0.12  
76 1 0.01 -0.01 0.01 0.07 -0.02 0.17 0.07 -0.12 0.14  
77 1 -0.01 0.01 0.02 0.01 -0.00 0.21 -0.01 -0.05 0.19  
78 1 0.09 -0.11 -0.38 0.02 0.01 0.00 0.01 -0.01 -0.10  
79 1 0.11 0.00 -0.15 0.02 0.02 0.01 0.01 0.01 -0.08  
80 6 0.13 0.00 -0.16 0.02 0.02 0.01 0.01 0.00 -0.09  
81 8 0.08 -0.11 -0.24 0.02 0.01 -0.00 0.01 -0.01 -0.09  
82 1 0.05 0.07 -0.08 0.01 0.02 0.01 0.01 0.00 -0.08  
83 1 0.25 0.06 -0.19 0.03 0.03 0.00 0.02 0.01 -0.10

TCO-P

-----  
Center Atomic Atomic Coordinates (Angstroms)

Number Number Type X Y Z  
-----

|    |    |   |           |           |           |
|----|----|---|-----------|-----------|-----------|
| 1  | 7  | 0 | 2.195934  | 0.000005  | -0.161703 |
| 2  | 7  | 0 | 0.166485  | -2.028392 | -0.198126 |
| 3  | 7  | 0 | -1.837311 | -0.000005 | -0.456302 |
| 4  | 7  | 0 | 0.166474  | 2.028391  | -0.198125 |
| 5  | 6  | 0 | 3.015324  | 1.102206  | -0.106139 |
| 6  | 6  | 0 | 4.398667  | 0.681444  | -0.028523 |
| 7  | 6  | 0 | 4.398671  | -0.681424 | -0.028525 |
| 8  | 6  | 0 | 3.015330  | -1.102193 | -0.106141 |
| 9  | 6  | 0 | 2.603991  | -2.440542 | -0.053721 |
| 10 | 6  | 0 | 1.262090  | -2.847238 | -0.068000 |
| 11 | 6  | 0 | 0.834538  | -4.226015 | 0.035304  |
| 12 | 6  | 0 | -0.527817 | -4.223726 | -0.017623 |
| 13 | 6  | 0 | -0.939490 | -2.847287 | -0.192686 |
| 14 | 6  | 0 | -2.268007 | -2.438369 | -0.368643 |
| 15 | 6  | 0 | -2.649474 | -1.102946 | -0.567525 |
| 16 | 6  | 0 | -4.006245 | -0.683520 | -0.840721 |
| 17 | 6  | 0 | -4.006248 | 0.683500  | -0.840722 |
| 18 | 6  | 0 | -2.649480 | 1.102933  | -0.567527 |
| 19 | 6  | 0 | -2.268019 | 2.438357  | -0.368647 |
| 20 | 6  | 0 | -0.939503 | 2.847281  | -0.192687 |
| 21 | 6  | 0 | -0.527838 | 4.223722  | -0.017624 |
| 22 | 6  | 0 | 0.834518  | 4.226018  | 0.035306  |
| 23 | 6  | 0 | 1.262077  | 2.847244  | -0.067996 |
| 24 | 6  | 0 | 2.603979  | 2.440554  | -0.053716 |
| 25 | 1  | 0 | 5.250742  | 1.351691  | 0.040469  |
| 26 | 1  | 0 | 5.250749  | -1.351667 | 0.040465  |
| 27 | 1  | 0 | 1.498650  | -5.079277 | 0.138890  |
| 28 | 1  | 0 | -1.200350 | -5.074062 | 0.044995  |
| 29 | 1  | 0 | -4.844496 | -1.352491 | -1.012090 |
| 30 | 1  | 0 | -4.844502 | 1.352466  | -1.012092 |
| 31 | 1  | 0 | -1.200374 | 5.074055  | 0.044993  |
| 32 | 1  | 0 | 1.498625  | 5.079283  | 0.138893  |
| 33 | 29 | 0 | 0.175346  | 0.000000  | -0.253425 |
| 34 | 6  | 0 | -3.354152 | -3.458105 | -0.285211 |
| 35 | 6  | 0 | -4.283993 | -3.389331 | 0.767544  |
| 36 | 6  | 0 | -3.473993 | -4.488103 | -1.231098 |
| 37 | 6  | 0 | -5.305070 | -4.335816 | 0.872019  |
| 38 | 1  | 0 | -4.200409 | -2.583612 | 1.501508  |
| 39 | 6  | 0 | -4.497796 | -5.432606 | -1.125948 |

40 1 0 -2.762947 -4.538221 -2.058516  
41 6 0 -5.414203 -5.360462 -0.072977  
42 1 0 -6.017635 -4.272664 1.697927  
43 1 0 -4.582899 -6.225438 -1.873111  
44 1 0 -6.214211 -6.100135 0.009235  
45 6 0 -3.354167 3.458089 -0.285218  
46 6 0 -4.284008 3.389315 0.767538  
47 6 0 -3.474013 4.488084 -1.231109  
48 6 0 -5.305089 4.335796 0.872008  
49 1 0 -4.200421 2.583600 1.501504  
50 6 0 -4.497820 5.432583 -1.125963  
51 1 0 -2.762967 4.538202 -2.058527  
52 6 0 -5.414227 5.360438 -0.072991  
53 1 0 -6.017653 4.272644 1.697917  
54 1 0 -4.582927 6.225411 -1.873128  
55 1 0 -6.214238 6.100108 0.009218  
56 6 0 3.659634 -3.494717 0.042300  
57 6 0 4.472767 -3.791657 -1.062511  
58 6 0 3.860060 -4.202042 1.238044  
59 6 0 5.462605 -4.773321 -0.974511  
60 1 0 4.319938 -3.246807 -1.996743  
61 6 0 4.849152 -5.184283 1.326676  
62 1 0 3.235069 -3.971478 2.103591  
63 6 0 5.653325 -5.472781 0.220416  
64 1 0 6.085266 -4.995053 -1.844676  
65 1 0 4.995000 -5.723609 2.265769  
66 1 0 6.427350 -6.240795 0.289623  
67 6 0 3.659617 3.494733 0.042307  
68 6 0 3.860041 4.202055 1.238053  
69 6 0 4.472748 3.791681 -1.062504  
70 6 0 4.849128 5.184301 1.326687  
71 1 0 3.235052 3.971485 2.103600  
72 6 0 5.462581 4.773349 -0.974502  
73 1 0 4.319921 3.246832 -1.996737  
74 6 0 5.653298 5.472807 0.220427  
75 1 0 4.994975 5.723625 2.265781  
76 1 0 6.085240 4.995087 -1.844667  
77 1 0 6.427319 6.240824 0.289636  
78 1 0 -3.847977 -0.000001 1.453076  
79 1 0 -1.850070 0.892948 2.354376  
80 6 0 -2.377150 -0.000002 2.738899  
81 8 0 -3.752366 -0.000002 2.415743  
82 1 0 -1.850070 -0.892953 2.354378  
83 1 0 -2.294958 -0.000001 3.836704

TMeOH-R

-----  
Center Atomic Atomic Coordinates (Angstroms)

Number Number Type X Y Z  
-----

|    |    |   |           |           |           |
|----|----|---|-----------|-----------|-----------|
| 1  | 7  | 0 | 2.187124  | 0.065191  | -0.283657 |
| 2  | 7  | 0 | 0.204266  | -2.017176 | -0.401588 |
| 3  | 7  | 0 | -1.848052 | -0.028661 | -0.661027 |
| 4  | 7  | 0 | 0.114627  | 2.053067  | -0.385890 |
| 5  | 6  | 0 | 2.983566  | 1.185947  | -0.248480 |
| 6  | 6  | 0 | 4.377260  | 0.793962  | -0.260747 |
| 7  | 6  | 0 | 4.406576  | -0.569984 | -0.271854 |
| 8  | 6  | 0 | 3.031659  | -1.020476 | -0.284973 |
| 9  | 6  | 0 | 2.647750  | -2.368441 | -0.236539 |
| 10 | 6  | 0 | 1.316562  | -2.808595 | -0.252376 |
| 11 | 6  | 0 | 0.916765  | -4.193997 | -0.124802 |
| 12 | 6  | 0 | -0.446287 | -4.219512 | -0.182405 |
| 13 | 6  | 0 | -0.885038 | -2.853964 | -0.383736 |
| 14 | 6  | 0 | -2.222209 | -2.470133 | -0.568453 |
| 15 | 6  | 0 | -2.634421 | -1.146041 | -0.777931 |
| 16 | 6  | 0 | -3.997593 | -0.756628 | -1.070964 |
| 17 | 6  | 0 | -4.028135 | 0.605084  | -1.067512 |
| 18 | 6  | 0 | -2.683970 | 1.053673  | -0.770593 |
| 19 | 6  | 0 | -2.332960 | 2.392432  | -0.544138 |
| 20 | 6  | 0 | -1.015782 | 2.836053  | -0.345835 |
| 21 | 6  | 0 | -0.646125 | 4.209755  | -0.082953 |
| 22 | 6  | 0 | 0.716282  | 4.247240  | -0.003107 |
| 23 | 6  | 0 | 1.187312  | 2.893216  | -0.199315 |
| 24 | 6  | 0 | 2.540179  | 2.515908  | -0.176663 |
| 25 | 1  | 0 | 5.219597  | 1.479766  | -0.260250 |
| 26 | 1  | 0 | 5.276418  | -1.220902 | -0.271252 |
| 27 | 1  | 0 | 1.597369  | -5.031976 | -0.002601 |
| 28 | 1  | 0 | -1.101441 | -5.082391 | -0.106733 |
| 29 | 1  | 0 | -4.818537 | -1.444614 | -1.250684 |
| 30 | 1  | 0 | -4.879200 | 1.256248  | -1.244150 |
| 31 | 1  | 0 | -1.343688 | 5.034331  | 0.031591  |
| 32 | 1  | 0 | 1.350210  | 5.108239  | 0.189154  |
| 33 | 29 | 0 | 0.157043  | 0.012295  | -0.407603 |
| 34 | 6  | 0 | -3.289516 | -3.505186 | -0.452300 |
| 35 | 6  | 0 | -4.211275 | -3.409314 | 0.605468  |
| 36 | 6  | 0 | -3.402164 | -4.569603 | -1.359594 |
| 37 | 6  | 0 | -5.218929 | -4.364111 | 0.752696  |

38 1 0 -4.118725 -2.573416 1.303874  
39 6 0 -4.413385 -5.522323 -1.211826  
40 1 0 -2.697363 -4.640060 -2.190949  
41 6 0 -5.322394 -5.423380 -0.154551  
42 1 0 -5.926823 -4.281369 1.581151  
43 1 0 -4.494927 -6.342579 -1.929291  
44 1 0 -6.112571 -6.169387 -0.039735  
45 6 0 -3.445735 3.376980 -0.417722  
46 6 0 -3.592390 4.456516 -1.302148  
47 6 0 -4.374462 3.219821 0.626629  
48 6 0 -4.644113 5.362806 -1.145855  
49 1 0 -2.881265 4.575271 -2.122536  
50 6 0 -5.422682 4.128325 0.782736  
51 1 0 -4.255038 2.373843 1.308555  
52 6 0 -5.560221 5.202380 -0.102323  
53 1 0 -4.751637 6.195044 -1.845880  
54 1 0 -6.135363 3.997875 1.600858  
55 1 0 -6.382102 5.912158 0.019276  
56 6 0 3.727001 -3.399973 -0.147123  
57 6 0 3.984920 -4.062935 1.062603  
58 6 0 4.503049 -3.721201 -1.271330  
59 6 0 4.993829 -5.025378 1.147072  
60 1 0 3.386323 -3.815400 1.942214  
61 6 0 5.513900 -4.681794 -1.187813  
62 1 0 4.304886 -3.211237 -2.216686  
63 6 0 5.761833 -5.337053 0.021633  
64 1 0 5.183136 -5.531387 2.096963  
65 1 0 6.107972 -4.922178 -2.072916  
66 1 0 6.551706 -6.089134 0.086948  
67 6 0 3.563632 3.596578 -0.057328  
68 6 0 4.383520 3.691616 1.079199  
69 6 0 3.722790 4.545139 -1.081029  
70 6 0 5.336571 4.706339 1.189763  
71 1 0 4.263323 2.962797 1.883677  
72 6 0 4.676295 5.559576 -0.972296  
73 1 0 3.093338 4.475844 -1.970732  
74 6 0 5.486290 5.643654 0.163749  
75 1 0 5.962215 4.767695 2.083599  
76 1 0 4.789925 6.285507 -1.781112  
77 1 0 6.232067 6.437540 0.249400  
78 6 0 -2.954744 -0.069324 3.608827  
79 1 0 -3.966971 -0.106070 4.042327  
80 1 0 -2.463514 0.851607 3.981635  
81 1 0 -2.389289 -0.934110 4.012172

82 8 0 -3.074806 -0.097005 2.210956  
83 1 0 -2.176912 -0.023088 1.842529  
84 6 0 0.628618 -0.725291 2.727510  
85 1 0 0.196202 -1.724368 2.581471  
86 1 0 0.661859 -0.506437 3.809290  
87 1 0 1.651995 -0.730041 2.318128  
88 8 0 -0.206169 0.189263 2.032303  
89 1 0 0.184845 1.074622 2.032613

TMeOH-TS1

-----  
Center Atomic Atomic Coordinates (Angstroms)

Number Number Type X Y Z  
-----

1 7 0 -0.379597 1.918121 -0.250846  
2 7 0 2.166385 0.565221 -0.220683  
3 7 0 0.739834 -1.941574 -0.104730  
4 7 0 -1.789959 -0.616143 0.062993  
5 6 0 -1.664557 2.401614 -0.086817  
6 6 0 -1.625204 3.856929 -0.084494  
7 6 0 -0.330845 4.225999 -0.269427  
8 6 0 0.452853 3.006343 -0.367136  
9 6 0 1.849267 2.997962 -0.476427  
10 6 0 2.640672 1.833056 -0.377829  
11 6 0 4.089389 1.813264 -0.352173  
12 6 0 4.463950 0.519909 -0.120762  
13 6 0 3.250291 -0.265733 -0.052181  
14 6 0 3.195867 -1.648666 0.152014  
15 6 0 2.013226 -2.417587 0.118846  
16 6 0 1.983082 -3.855082 0.192783  
17 6 0 0.682780 -4.238891 -0.016009  
18 6 0 -0.081826 -3.036425 -0.209435  
19 6 0 -1.473995 -3.014089 -0.504732  
20 6 0 -2.245013 -1.867552 -0.469467  
21 6 0 -3.591567 -1.699991 -0.907078  
22 6 0 -4.013455 -0.434872 -0.589272  
23 6 0 -2.939027 0.256906 0.068829  
24 6 0 -2.850629 1.676407 0.034444  
25 1 0 -2.486463 4.500759 0.065747  
26 1 0 0.078262 5.231785 -0.304178  
27 1 0 4.730848 2.680979 -0.476319  
28 1 0 5.471233 0.127186 -0.014187  
29 1 0 2.847048 -4.492307 0.358966



30 1 0 0.278988 -5.247386 -0.031107  
31 1 0 -4.156891 -2.463625 -1.435836  
32 1 0 -4.971369 0.020352 -0.823849  
33 29 0 0.249279 0.021726 -0.122247  
34 6 0 4.481149 -2.375454 0.380306  
35 6 0 4.768672 -2.931586 1.636795  
36 6 0 5.419078 -2.522535 -0.653670  
37 6 0 5.967056 -3.614475 1.855782  
38 1 0 4.043632 -2.819426 2.445826  
39 6 0 6.617528 -3.206029 -0.435486  
40 1 0 5.197360 -2.100964 -1.636398  
41 6 0 6.895437 -3.753445 0.820103  
42 1 0 6.178042 -4.037142 2.841143  
43 1 0 7.335559 -3.315115 -1.251955  
44 1 0 7.832894 -4.288013 0.990937  
45 6 0 -2.141890 -4.292783 -0.876035  
46 6 0 -1.677093 -5.061056 -1.957523  
47 6 0 -3.255999 -4.752311 -0.152766  
48 6 0 -2.311497 -6.253894 -2.307643  
49 1 0 -0.816294 -4.708539 -2.529210  
50 6 0 -3.888409 -5.947459 -0.501275  
51 1 0 -3.615881 -4.167756 0.696685  
52 6 0 -3.418781 -6.701402 -1.580299  
53 1 0 -1.942378 -6.835137 -3.156090  
54 1 0 -4.748566 -6.293758 0.076737  
55 1 0 -3.913823 -7.636209 -1.853934  
56 6 0 2.544650 4.309228 -0.645863  
57 6 0 3.343132 4.842197 0.379514  
58 6 0 2.401900 5.041873 -1.835328  
59 6 0 3.983392 6.072843 0.218926  
60 1 0 3.450964 4.285117 1.312698  
61 6 0 3.040908 6.273427 -1.996916  
62 1 0 1.784480 4.633407 -2.638419  
63 6 0 3.834659 6.792385 -0.970396  
64 1 0 4.596513 6.474824 1.029295  
65 1 0 2.920855 6.828301 -2.930662  
66 1 0 4.334931 7.755605 -1.095947  
67 6 0 -4.152577 2.400129 0.094987  
68 6 0 -4.993654 2.219632 1.207079  
69 6 0 -4.577778 3.236545 -0.951459  
70 6 0 -6.225667 2.873660 1.272004  
71 1 0 -4.639284 1.565184 2.005797  
72 6 0 -5.811575 3.886855 -0.884066  
73 1 0 -3.938495 3.362618 -1.828061

```

74 6 0 -6.638621 3.708636 0.229370
75 1 0 -6.867066 2.732355 2.145635
76 1 0 -6.131822 4.529799 -1.707735
77 1 0 -7.604381 4.217436 0.281563
78 6 0 -4.034701 -1.078351 2.408383
79 1 0 -4.291427 -1.066822 3.492208
80 1 0 -3.686861 -2.117269 2.180425
81 1 0 -5.006001 -0.965735 1.866574
82 8 0 -3.123802 -0.102408 2.088912
83 1 0 -1.601583 -0.706051 1.081138
84 6 0 -0.330470 1.061740 3.032365
85 1 0 -0.088719 1.978196 2.478072
86 1 0 0.159626 1.111552 4.020549
87 1 0 -1.423993 0.980600 3.139185
88 8 0 0.179000 -0.026942 2.260830
89 1 0 -0.001902 -0.856664 2.721416

```

\*\*\*\*\* 1 imaginary frequencies (negative Signs) \*\*\*\*\*

Diagonal vibrational polarizability:

193.7512982 38.7190229 130.5960101

Harmonic frequencies (cm<sup>-1</sup>), IR intensities (KM/Mole), Raman scattering activities (A<sup>4</sup>/AMU), depolarization ratios for plane and unpolarized incident light, reduced masses (AMU), force constants (mDyne/A), and normal coordinates:

1 2 3

A A A

Frequencies -- -248.0637 11.2514 24.3694

Red. masses -- 5.3032 6.0832 4.4481

Frc consts -- 0.1923 0.0005 0.0016

IR Inten -- 200.2605 0.0956 0.4204

Atom AN X Y Z X Y Z X Y Z

```

1 7 -0.00 0.02 0.01 0.00 0.00 -0.00 0.01 0.01 -0.05
2 7 -0.01 -0.00 -0.00 0.00 0.00 0.00 0.00 0.00 -0.03
3 7 -0.00 0.00 0.00 0.00 -0.00 -0.00 0.00 0.01 -0.04
4 7 -0.03 0.05 0.06 -0.00 0.00 0.00 -0.00 0.01 -0.01
5 6 0.02 0.04 -0.01 -0.00 0.00 0.02 0.01 0.01 -0.07
6 6 0.01 0.02 -0.04 -0.00 0.00 0.01 0.02 0.01 -0.11
7 6 0.02 0.02 -0.01 -0.00 0.00 -0.03 0.02 0.01 -0.11
8 6 0.00 0.01 0.00 0.00 0.01 -0.03 0.01 0.01 -0.06
9 6 0.01 -0.00 0.00 0.00 0.01 -0.05 0.01 0.00 -0.02
10 6 -0.00 0.00 0.00 0.00 0.01 -0.02 0.01 -0.00 0.01
11 6 -0.00 -0.00 0.00 0.00 0.01 -0.00 0.01 -0.01 0.06
12 6 -0.00 -0.00 0.00 0.01 0.00 0.03 0.01 -0.01 0.06
13 6 -0.01 0.00 0.00 0.01 -0.00 0.03 0.00 -0.00 0.00
14 6 -0.01 -0.00 0.00 0.01 -0.00 0.04 0.00 0.00 -0.02

```

15 6 -0.01 0.01 0.01 0.01 -0.00 0.02 -0.00 0.01 -0.06  
16 6 -0.01 -0.00 0.00 0.01 0.00 -0.00 -0.01 0.01 -0.10  
17 6 -0.00 -0.00 0.00 0.00 -0.00 -0.04 -0.01 0.01 -0.10  
18 6 -0.01 0.01 -0.00 0.00 -0.00 -0.04 -0.00 0.01 -0.06  
19 6 -0.00 0.00 -0.03 -0.00 -0.01 -0.05 0.01 0.01 -0.02  
20 6 -0.02 0.01 -0.00 -0.00 -0.01 -0.02 0.01 0.01 0.01  
21 6 -0.02 -0.05 -0.01 0.00 -0.02 -0.01 0.03 0.02 0.07  
22 6 -0.01 0.01 0.13 0.00 -0.01 0.03 0.02 0.02 0.07  
23 6 0.03 0.09 0.41 -0.00 0.00 0.03 0.00 0.01 0.02  
24 6 -0.00 0.02 0.09 -0.01 0.00 0.05 0.00 0.01 -0.03  
25 1 0.01 0.02 -0.04 -0.01 -0.00 0.02 0.02 0.01 -0.14  
26 1 0.02 0.02 -0.00 -0.00 0.00 -0.05 0.02 0.01 -0.13  
27 1 0.00 -0.00 0.00 0.00 0.01 -0.01 0.01 -0.02 0.10  
28 1 -0.01 -0.00 0.00 0.01 -0.00 0.06 0.01 -0.02 0.10  
29 1 -0.01 -0.00 0.00 0.01 0.00 0.01 -0.01 0.01 -0.12  
30 1 -0.00 0.00 -0.00 0.00 -0.00 -0.06 -0.01 0.01 -0.12  
31 1 -0.04 -0.11 -0.12 0.01 -0.03 -0.02 0.05 0.03 0.10  
32 1 -0.03 -0.03 0.14 0.01 -0.01 0.05 0.04 0.03 0.10  
33 29 -0.03 -0.01 -0.03 0.00 0.00 0.00 0.00 0.01 -0.04  
34 6 -0.00 -0.00 0.00 0.02 -0.00 0.09 0.01 -0.00 0.00  
35 6 -0.00 0.00 -0.00 0.06 -0.01 0.10 0.06 0.06 -0.01  
36 6 -0.00 0.00 0.00 -0.02 -0.00 0.12 -0.05 -0.06 0.05  
37 6 -0.00 0.00 0.00 0.07 -0.01 0.14 0.07 0.06 0.02  
38 1 -0.00 0.00 -0.00 0.09 -0.01 0.07 0.11 0.11 -0.04  
39 6 -0.00 0.00 0.00 -0.01 -0.00 0.16 -0.05 -0.07 0.07  
40 1 -0.00 -0.00 0.00 -0.05 0.00 0.11 -0.10 -0.11 0.05  
41 6 -0.00 0.00 0.00 0.03 -0.00 0.17 0.01 -0.01 0.06  
42 1 -0.00 0.00 -0.00 0.10 -0.01 0.15 0.12 0.11 0.01  
43 1 -0.00 0.00 0.00 -0.04 0.00 0.19 -0.09 -0.12 0.11  
44 1 -0.00 0.00 0.00 0.04 -0.00 0.21 0.01 -0.01 0.08  
45 6 0.00 -0.00 -0.02 -0.01 -0.02 -0.09 0.02 0.01 -0.00  
46 6 0.00 0.01 -0.01 -0.02 -0.05 -0.10 0.07 -0.01 -0.04  
47 6 -0.00 -0.00 -0.02 -0.00 0.01 -0.11 -0.03 0.03 0.06  
48 6 0.00 0.01 -0.00 -0.03 -0.06 -0.14 0.08 -0.01 -0.02  
49 1 -0.00 0.01 -0.01 -0.03 -0.07 -0.08 0.11 -0.03 -0.08  
50 6 0.00 -0.00 -0.00 -0.01 -0.00 -0.15 -0.02 0.03 0.08  
51 1 -0.00 -0.01 -0.02 0.01 0.03 -0.10 -0.08 0.05 0.09  
52 6 0.00 0.00 -0.00 -0.02 -0.03 -0.17 0.03 0.01 0.04  
53 1 0.00 0.02 -0.00 -0.04 -0.08 -0.15 0.13 -0.03 -0.05  
54 1 -0.00 -0.00 -0.00 -0.00 0.02 -0.17 -0.06 0.05 0.13  
55 1 0.00 0.01 0.01 -0.03 -0.04 -0.20 0.04 0.01 0.06  
56 6 0.01 -0.00 0.00 0.01 0.01 -0.09 0.00 -0.00 0.02  
57 6 0.00 -0.00 -0.00 -0.00 -0.02 -0.11 0.09 -0.01 0.08  
58 6 0.00 -0.00 0.00 0.02 0.05 -0.11 -0.08 0.01 0.00

59 6 -0.00 0.00 -0.00 0.00 -0.02 -0.15 0.09 -0.02 0.12  
60 1 0.00 -0.00 -0.00 -0.01 -0.05 -0.09 0.16 -0.02 0.09  
61 6 0.00 -0.00 0.00 0.03 0.05 -0.15 -0.09 0.01 0.04  
62 1 0.00 -0.00 0.00 0.03 0.07 -0.09 -0.15 0.02 -0.04  
63 6 -0.00 -0.00 -0.00 0.02 0.02 -0.17 -0.00 -0.01 0.10  
64 1 -0.00 0.00 -0.00 -0.01 -0.04 -0.17 0.15 -0.03 0.16  
65 1 -0.00 -0.00 -0.00 0.04 0.08 -0.16 -0.16 0.01 0.03  
66 1 -0.00 0.00 -0.00 0.02 0.02 -0.20 -0.00 -0.01 0.13  
67 6 -0.00 0.01 0.04 -0.01 0.00 0.08 0.00 0.01 -0.01  
68 6 0.03 -0.02 0.02 -0.04 0.01 0.10 -0.04 -0.04 0.03  
69 6 -0.01 0.02 0.02 0.02 -0.00 0.10 0.05 0.06 -0.03  
70 6 0.03 -0.02 -0.00 -0.04 0.01 0.14 -0.04 -0.04 0.05  
71 1 0.06 -0.05 0.05 -0.06 0.01 0.09 -0.07 -0.07 0.04  
72 6 -0.02 0.01 -0.00 0.02 -0.00 0.13 0.05 0.06 -0.01  
73 1 -0.02 0.04 0.02 0.05 -0.01 0.08 0.08 0.09 -0.06  
74 6 0.01 -0.01 -0.02 -0.01 0.00 0.15 0.00 0.01 0.03  
75 1 0.04 -0.04 -0.01 -0.06 0.02 0.15 -0.08 -0.07 0.08  
76 1 -0.04 0.02 -0.02 0.04 -0.01 0.15 0.08 0.10 -0.03  
77 1 0.00 -0.02 -0.04 -0.01 0.00 0.18 0.00 0.01 0.05  
78 6 0.02 -0.04 -0.12 -0.03 0.03 0.02 -0.08 -0.07 0.08  
79 1 -0.19 -0.12 -0.09 -0.07 0.07 0.03 -0.15 -0.07 0.10  
80 1 -0.09 -0.09 -0.12 0.01 0.03 -0.03 -0.03 -0.06 0.06  
81 1 0.09 0.05 0.02 -0.01 -0.01 0.06 -0.04 -0.10 0.15  
82 8 0.13 -0.16 -0.22 -0.04 0.04 0.03 -0.08 -0.04 0.02  
83 1 -0.54 0.17 -0.10 -0.00 0.03 0.00 -0.01 -0.00 -0.01  
84 6 0.00 0.01 0.00 -0.03 -0.00 -0.00 -0.11 -0.07 -0.07  
85 1 0.03 0.02 -0.03 -0.04 0.00 -0.01 -0.15 -0.04 -0.09  
86 1 -0.05 -0.01 -0.02 -0.03 -0.00 -0.00 -0.10 -0.07 -0.06  
87 1 -0.00 -0.01 0.06 -0.03 -0.01 -0.01 -0.10 -0.12 -0.07  
88 8 0.04 0.02 -0.00 -0.03 0.00 0.00 -0.06 -0.02 -0.03  
89 1 -0.33 0.00 0.17 0.01 0.00 -0.01 0.01 -0.04 -0.02

TMeOH-INT1

-----  
Center Atomic Atomic Coordinates (Angstroms)

Number Number Type X Y Z

-----  
1 7 0 -0.773770 1.704488 -0.269496  
2 7 0 1.977213 0.945470 -0.141031  
3 7 0 1.093459 -1.767396 -0.120258  
4 7 0 -1.572156 -1.019450 0.473255  
5 6 0 -2.147301 1.895502 -0.149484  
6 6 0 -2.438331 3.295982 -0.474340

7 6 0 -1.258814 3.912143 -0.724625  
8 6 0 -0.204748 2.916425 -0.573687  
9 6 0 1.159432 3.222672 -0.608846  
10 6 0 2.176850 2.279795 -0.322121  
11 6 0 3.584034 2.577744 -0.157438  
12 6 0 4.209196 1.401736 0.159110  
13 6 0 3.204646 0.362778 0.131138  
14 6 0 3.432847 -1.009706 0.260876  
15 6 0 2.438595 -2.005379 0.082687  
16 6 0 2.687427 -3.411796 -0.023484  
17 6 0 1.480116 -4.014175 -0.316703  
18 6 0 0.499348 -2.976008 -0.359046  
19 6 0 -0.907457 -3.172244 -0.569388  
20 6 0 -1.854914 -2.243914 -0.217691  
21 6 0 -3.276599 -2.309127 -0.431222  
22 6 0 -3.888192 -1.275283 0.183821  
23 6 0 -2.874126 -0.369307 0.845452  
24 6 0 -3.105161 1.027372 0.323711  
25 1 0 -3.426073 3.745761 -0.447650  
26 1 0 -1.090571 4.961266 -0.952410  
27 1 0 4.031541 3.562727 -0.256663  
28 1 0 5.264264 1.248519 0.368812  
29 1 0 3.658693 -3.887730 0.080173  
30 1 0 1.282001 -5.072271 -0.467531  
31 1 0 -3.756569 -3.086991 -1.021118  
32 1 0 -4.950580 -1.048281 0.184480  
33 29 0 0.216532 0.027150 -0.108417  
34 6 0 4.821945 -1.478662 0.538215  
35 6 0 5.115161 -2.163506 1.729182  
36 6 0 5.857973 -1.263302 -0.385323  
37 6 0 6.410915 -2.609759 1.995905  
38 1 0 4.314486 -2.341976 2.450258  
39 6 0 7.153923 -1.711716 -0.120489  
40 1 0 5.635303 -0.749581 -1.322599  
41 6 0 7.435324 -2.384211 1.071852  
42 1 0 6.621953 -3.134689 2.930823  
43 1 0 7.946601 -1.539884 -0.852802  
44 1 0 8.449272 -2.734617 1.279131  
45 6 0 -1.342882 -4.469166 -1.158631  
46 6 0 -0.832767 -4.891843 -2.398557  
47 6 0 -2.254673 -5.303133 -0.489940  
48 6 0 -1.234600 -6.104978 -2.959155  
49 1 0 -0.118629 -4.253804 -2.923114  
50 6 0 -2.657195 -6.517775 -1.050011

51 1 0 -2.636524 -4.997742 0.486594  
52 6 0 -2.149899 -6.921757 -2.287676  
53 1 0 -0.833238 -6.413723 -3.927490  
54 1 0 -3.363253 -7.155512 -0.512430  
55 1 0 -2.462773 -7.872421 -2.726069  
56 6 0 1.564329 4.628609 -0.911134  
57 6 0 2.104522 5.457489 0.086235  
58 6 0 1.404486 5.155975 -2.202954  
59 6 0 2.477094 6.772885 -0.199452  
60 1 0 2.223143 5.061791 1.097476  
61 6 0 1.770414 6.473411 -2.489831  
62 1 0 0.989631 4.517824 -2.986517  
63 6 0 2.310259 7.285916 -1.489128  
64 1 0 2.892519 7.403066 0.590989  
65 1 0 1.638313 6.865120 -3.501546  
66 1 0 2.599044 8.315732 -1.712813  
67 6 0 -4.527384 1.480748 0.362160  
68 6 0 -5.245393 1.539776 1.570688  
69 6 0 -5.194104 1.837472 -0.824853  
70 6 0 -6.581003 1.948553 1.588234  
71 1 0 -4.738298 1.265560 2.495166  
72 6 0 -6.527343 2.249892 -0.806189  
73 1 0 -4.654166 1.773651 -1.771901  
74 6 0 -7.227860 2.306632 0.402370  
75 1 0 -7.118344 1.994751 2.538961  
76 1 0 -7.024249 2.519454 -1.741539  
77 1 0 -8.272558 2.626406 0.418945  
78 6 0 -3.131050 -1.522906 2.959508  
79 1 0 -3.111867 -1.284873 4.031577  
80 1 0 -2.322778 -2.246692 2.749580  
81 1 0 -4.095457 -1.995864 2.708555  
82 8 0 -2.947505 -0.299471 2.271095  
83 1 0 -1.021448 -1.155693 1.331959  
84 6 0 0.111251 1.052271 2.994563  
85 1 0 -0.981540 1.152885 3.037050  
86 1 0 0.514619 1.858982 2.360164  
87 1 0 0.521499 1.147655 4.015613  
88 8 0 0.375954 -0.232255 2.443484  
89 1 0 1.326078 -0.336882 2.292194

TMeOH-INT2

-----  
Center Atomic Atomic Coordinates (Angstroms)

S62

Number Number Type X Y Z

-----  
1 7 0 -0.637709 1.737437 -0.291852  
2 7 0 2.037226 0.701732 -0.159060  
3 7 0 0.945115 -1.915949 -0.090859  
4 7 0 -1.627005 -0.870173 0.277834  
5 6 0 -1.997974 2.009790 -0.373389  
6 6 0 -2.167996 3.374096 -0.868744  
7 6 0 -0.924711 3.897315 -1.031824  
8 6 0 0.028781 2.867731 -0.639102  
9 6 0 1.428915 3.060910 -0.566478  
10 6 0 2.338899 2.036430 -0.262842  
11 6 0 3.752404 2.227762 0.000481  
12 6 0 4.279267 0.994072 0.259182  
13 6 0 3.197191 0.038199 0.127329  
14 6 0 3.338251 -1.369085 0.202889  
15 6 0 2.274504 -2.260964 0.020635  
16 6 0 2.410269 -3.693264 -0.183072  
17 6 0 1.163977 -4.179389 -0.445940  
18 6 0 0.242483 -3.054671 -0.367463  
19 6 0 -1.158996 -3.157650 -0.471794  
20 6 0 -2.011619 -2.092800 -0.109734  
21 6 0 -3.481381 -2.208973 -0.027723  
22 6 0 -3.955390 -1.075467 0.505669  
23 6 0 -2.789183 -0.130229 0.753701  
24 6 0 -3.020490 1.206718 0.081363  
25 1 0 -3.122557 3.866411 -1.029947  
26 1 0 -0.661104 4.895563 -1.369853  
27 1 0 4.261864 3.187398 0.013578  
28 1 0 5.306289 0.749783 0.515371  
29 1 0 3.348447 -4.241105 -0.156472  
30 1 0 0.876345 -5.206925 -0.652208  
31 1 0 -4.048916 -3.082089 -0.340277  
32 1 0 -4.989945 -0.822583 0.722015  
33 29 0 0.194598 -0.062018 0.036805  
34 6 0 4.698784 -1.939210 0.418974  
35 6 0 4.964916 -2.735708 1.545519  
36 6 0 5.737136 -1.709969 -0.500001  
37 6 0 6.232780 -3.284087 1.750472  
38 1 0 4.165867 -2.915785 2.267817  
39 6 0 7.004770 -2.258367 -0.296302  
40 1 0 5.537687 -1.105620 -1.387229  
41 6 0 7.257519 -3.046494 0.830414  
42 1 0 6.422099 -3.896148 2.635740

43 1 0 7.797939 -2.074668 -1.025217  
44 1 0 8.249835 -3.475093 0.989900  
45 6 0 -1.742120 -4.465855 -0.886073  
46 6 0 -1.497447 -4.975107 -2.173387  
47 6 0 -2.525233 -5.233117 -0.005977  
48 6 0 -2.024137 -6.205784 -2.570910  
49 1 0 -0.889610 -4.388833 -2.866153  
50 6 0 -3.058956 -6.461100 -0.403457  
51 1 0 -2.702704 -4.863891 1.006758  
52 6 0 -2.810367 -6.951981 -1.688298  
53 1 0 -1.824331 -6.581300 -3.577569  
54 1 0 -3.663064 -7.042508 0.297576  
55 1 0 -3.224953 -7.913859 -1.999273  
56 6 0 1.965078 4.431105 -0.801075  
57 6 0 1.592401 5.500117 0.032473  
58 6 0 2.861549 4.680104 -1.854280  
59 6 0 2.099697 6.782323 -0.185046  
60 1 0 0.913834 5.304864 0.866006  
61 6 0 3.367805 5.963230 -2.072324  
62 1 0 3.152184 3.856130 -2.509431  
63 6 0 2.987732 7.018922 -1.238856  
64 1 0 1.805742 7.600213 0.477479  
65 1 0 4.059042 6.139967 -2.900090  
66 1 0 3.384136 8.022936 -1.408671  
67 6 0 -4.419108 1.700256 0.031520  
68 6 0 -5.161977 1.854260 1.217835  
69 6 0 -5.036771 2.010270 -1.192625  
70 6 0 -6.479647 2.311045 1.176551  
71 1 0 -4.682138 1.620987 2.169695  
72 6 0 -6.355878 2.467371 -1.231339  
73 1 0 -4.475366 1.873555 -2.119120  
74 6 0 -7.082330 2.619811 -0.047452  
75 1 0 -7.038518 2.434684 2.107598  
76 1 0 -6.820489 2.698616 -2.193044  
77 1 0 -8.114565 2.976552 -0.077741  
78 6 0 -2.704552 -0.929817 3.051641  
79 1 0 -2.356130 -0.579688 4.033674  
80 1 0 -2.066562 -1.767786 2.720782  
81 1 0 -3.741178 -1.293185 3.144762  
82 8 0 -2.612547 0.178125 2.170488  
83 1 0 -0.745454 0.494674 2.408502  
84 6 0 -0.307564 3.617789 2.585486  
85 1 0 -1.189706 3.752767 1.958829  
86 1 0 0.276248 2.700346 2.509318



87 1 0 -0.054455 4.373291 3.331312  
88 8 0 0.217213 0.327160 2.452474  
89 1 0 0.282447 -0.615983 2.652328

TMeOH-TS2

-----  
Center Atomic Atomic Coordinates (Angstroms)

Number Number Type X Y Z  
-----

1 7 0 -0.088853 -1.927443 -0.455510  
2 7 0 -2.150251 0.069741 -0.265924  
3 7 0 -0.149427 2.137968 -0.255642  
4 7 0 1.912957 0.145370 -0.443098  
5 6 0 1.028404 -2.725691 -0.484894  
6 6 0 0.633766 -4.116445 -0.556432  
7 6 0 -0.730537 -4.139996 -0.588191  
8 6 0 -1.176422 -2.764787 -0.497337  
9 6 0 -2.522328 -2.377461 -0.408904  
10 6 0 -2.950422 -1.047685 -0.275634  
11 6 0 -4.332021 -0.661175 -0.079681  
12 6 0 -4.350401 0.697178 0.042791  
13 6 0 -2.980786 1.149941 -0.085964  
14 6 0 -2.589616 2.496776 -0.021128  
15 6 0 -1.259770 2.935338 -0.121781  
16 6 0 -0.863663 4.328636 -0.118400  
17 6 0 0.494431 4.354295 -0.240139  
18 6 0 0.935135 2.977817 -0.329483  
19 6 0 2.279266 2.592027 -0.441890  
20 6 0 2.713028 1.259066 -0.487956  
21 6 0 4.103609 0.859073 -0.572625  
22 6 0 4.124099 -0.504502 -0.542946  
23 6 0 2.746434 -0.943092 -0.464018  
24 6 0 2.359272 -2.289254 -0.450647  
25 1 0 1.319751 -4.958220 -0.587087  
26 1 0 -1.382459 -5.006040 -0.657883  
27 1 0 -5.171490 -1.348645 -0.026368  
28 1 0 -5.208369 1.340590 0.215575  
29 1 0 -1.543598 5.172029 -0.039028  
30 1 0 1.147156 5.222219 -0.267426  
31 1 0 4.946566 1.540048 -0.648131  
32 1 0 4.985560 -1.164952 -0.587525  
33 29 0 -0.111234 0.104411 -0.309653  
34 6 0 -3.656030 3.529271 0.150417

35 6 0 -3.744408 4.280542 1.333433  
36 6 0 -4.590407 3.770463 -0.869806  
37 6 0 -4.740744 5.246043 1.493867  
38 1 0 -3.023482 4.098712 2.133564  
39 6 0 -5.587099 4.735779 -0.710995  
40 1 0 -4.524597 3.195774 -1.796126  
41 6 0 -5.665748 5.476517 0.471747  
42 1 0 -4.796795 5.818472 2.423024  
43 1 0 -6.303023 4.913362 -1.517236  
44 1 0 -6.445335 6.231833 0.596299  
45 6 0 3.315691 3.667822 -0.487329  
46 6 0 3.447667 4.489866 -1.617357  
47 6 0 4.175774 3.876355 0.602525  
48 6 0 4.416453 5.495394 -1.657340  
49 1 0 2.784581 4.330454 -2.470476  
50 6 0 5.145054 4.881128 0.563557  
51 1 0 4.073991 3.243863 1.487189  
52 6 0 5.268184 5.693832 -0.567028  
53 1 0 4.508923 6.124112 -2.546314  
54 1 0 5.804588 5.032274 1.421635  
55 1 0 6.026331 6.479993 -0.598315  
56 6 0 -3.563941 -3.448625 -0.419447  
57 6 0 -3.683558 -4.342498 0.657058  
58 6 0 -4.447433 -3.577663 -1.502793  
59 6 0 -4.659766 -5.341164 0.649944  
60 1 0 -3.005026 -4.244334 1.507078  
61 6 0 -5.424041 -4.576221 -1.511214  
62 1 0 -4.358467 -2.888105 -2.345059  
63 6 0 -5.533026 -5.461249 -0.434905  
64 1 0 -4.741137 -6.026088 1.497507  
65 1 0 -6.100576 -4.665716 -2.364673  
66 1 0 -6.296741 -6.242584 -0.441322  
67 6 0 3.438386 -3.318517 -0.358008  
68 6 0 4.102030 -3.504762 0.865562  
69 6 0 3.803757 -4.101969 -1.462259  
70 6 0 5.114450 -4.460633 0.977147  
71 1 0 3.800680 -2.893790 1.719858  
72 6 0 4.817571 -5.056902 -1.347827  
73 1 0 3.291116 -3.953832 -2.415552  
74 6 0 5.475065 -5.238191 -0.127704  
75 1 0 5.622908 -4.601218 1.934336  
76 1 0 5.097126 -5.658873 -2.216042  
77 1 0 6.268001 -5.984858 -0.038446  
78 6 0 2.873041 0.037065 2.959171

79 1 0 2.929845 0.460269 3.977673  
80 1 0 1.666229 -0.290154 2.537569  
81 1 0 3.552305 0.448850 2.195730  
82 8 0 2.440325 -1.246556 2.812482  
83 1 0 -0.637537 0.494286 2.481631  
84 6 0 -0.388282 -3.001531 3.014831  
85 1 0 -0.460414 -3.533101 2.064361  
86 1 0 0.583699 -2.626260 3.344399  
87 1 0 -1.236726 -3.015349 3.702782  
88 8 0 0.000094 -0.129273 2.105819  
89 1 0 -0.362845 -1.027025 2.257604

\*\*\*\*\* 1 imaginary frequencies (negative Signs) \*\*\*\*\*

Diagonal vibrational polarizability:

49.4772770 51.7081180 117.2462883

Harmonic frequencies (cm<sup>-1</sup>), IR intensities (KM/Mole), Raman scattering activities (A<sup>4</sup>/AMU), depolarization ratios for plane and unpolarized incident light, reduced masses (AMU), force constants (mDyne/A), and normal coordinates:

1 2 3

A A A

Frequencies -- -1960.6807 10.0068 24.2420

Red. masses -- 1.1286 6.1428 4.5147

Frc consts -- 2.5562 0.0004 0.0016

IR Inten -- 86.4669 0.0621 0.0747

Atom AN X Y Z X Y Z X Y Z

1 7 -0.00 -0.00 -0.00 0.00 -0.00 0.00 -0.01 -0.01 -0.00  
2 7 -0.00 0.00 -0.00 0.00 -0.00 -0.00 -0.01 -0.01 -0.03  
3 7 0.00 0.00 -0.00 0.00 -0.01 -0.00 -0.00 -0.01 -0.01  
4 7 0.00 0.00 -0.00 0.00 -0.00 0.00 -0.01 -0.01 -0.04  
5 6 -0.00 0.00 0.00 0.00 -0.00 0.03 -0.01 -0.02 0.02  
6 6 -0.00 -0.00 -0.00 0.01 -0.00 0.02 -0.01 -0.02 0.07  
7 6 0.00 -0.00 -0.00 0.01 -0.00 -0.02 -0.01 -0.02 0.07  
8 6 0.00 0.00 0.00 0.00 -0.00 -0.03 -0.01 -0.01 0.02  
9 6 0.00 0.00 -0.00 0.00 -0.00 -0.05 -0.01 -0.01 -0.01  
10 6 0.00 0.00 0.00 0.00 -0.00 -0.03 -0.01 -0.00 -0.05  
11 6 -0.00 0.00 0.00 0.00 -0.01 -0.02 -0.02 0.00 -0.09  
12 6 -0.00 -0.00 0.00 0.01 -0.01 0.02 -0.01 -0.00 -0.09  
13 6 0.00 -0.00 -0.00 0.01 -0.01 0.03 -0.01 -0.01 -0.04  
14 6 0.00 -0.00 0.00 0.01 -0.01 0.05 -0.00 -0.01 -0.01  
15 6 0.00 -0.00 0.00 0.01 -0.01 0.03 -0.00 -0.01 0.02  
16 6 -0.00 0.00 0.00 0.00 -0.01 0.02 0.00 -0.01 0.07  
17 6 0.00 0.00 0.00 0.00 -0.01 -0.02 0.00 -0.01 0.07  
18 6 -0.00 0.00 -0.00 0.00 -0.00 -0.03 -0.00 -0.01 0.02  
19 6 -0.00 0.00 0.00 0.00 -0.00 -0.05 -0.00 -0.01 -0.01

20 6 -0.00 -0.00 -0.00 0.00 -0.00 -0.02 -0.01 -0.01 -0.05  
21 6 0.00 0.00 0.00 0.00 -0.01 -0.01 -0.01 -0.02 -0.09  
22 6 -0.00 -0.00 0.00 0.00 -0.00 0.03 -0.01 -0.01 -0.09  
23 6 -0.00 0.00 0.00 0.00 -0.00 0.03 -0.01 -0.01 -0.05  
24 6 -0.00 0.00 0.00 0.00 -0.00 0.05 -0.01 -0.01 -0.01  
25 1 -0.00 -0.00 0.00 0.01 -0.00 0.03 -0.02 -0.02 0.11  
26 1 0.00 -0.00 0.00 0.01 -0.00 -0.04 -0.02 -0.02 0.11  
27 1 -0.00 0.00 0.00 0.00 -0.01 -0.04 -0.02 0.00 -0.12  
28 1 -0.00 -0.00 0.00 0.01 -0.01 0.04 -0.02 0.00 -0.11  
29 1 -0.00 0.00 -0.00 0.01 -0.01 0.04 0.01 -0.01 0.10  
30 1 -0.00 0.00 -0.00 -0.00 -0.00 -0.04 0.01 -0.01 0.10  
31 1 0.00 0.00 -0.00 0.00 -0.01 -0.03 -0.01 -0.02 -0.12  
32 1 0.00 -0.00 -0.00 0.00 -0.01 0.05 -0.01 -0.01 -0.11  
33 29 0.00 -0.00 0.00 0.00 -0.00 -0.00 -0.01 -0.01 -0.02  
34 6 0.00 -0.00 -0.00 0.01 -0.01 0.09 -0.00 -0.01 0.01  
35 6 -0.00 0.00 -0.00 0.05 -0.03 0.11 -0.04 -0.07 0.05  
36 6 -0.00 0.00 0.00 -0.01 0.01 0.12 0.04 0.05 -0.01  
37 6 0.00 0.00 -0.00 0.05 -0.03 0.15 -0.04 -0.07 0.06  
38 1 -0.00 -0.00 -0.00 0.07 -0.05 0.08 -0.07 -0.12 0.06  
39 6 -0.00 0.00 0.00 -0.00 0.01 0.16 0.04 0.05 0.01  
40 1 0.00 -0.00 0.00 -0.04 0.03 0.11 0.06 0.10 -0.04  
41 6 -0.00 0.00 0.00 0.03 -0.01 0.18 0.00 -0.01 0.04  
42 1 -0.00 -0.00 0.00 0.08 -0.05 0.16 -0.06 -0.12 0.09  
43 1 -0.00 -0.00 0.00 -0.02 0.03 0.18 0.07 0.10 -0.01  
44 1 -0.00 0.00 0.00 0.03 -0.01 0.21 0.00 -0.01 0.06  
45 6 -0.00 -0.00 0.00 -0.00 -0.00 -0.09 -0.00 -0.02 0.02  
46 6 0.00 0.00 0.00 -0.03 -0.02 -0.11 -0.03 0.05 0.06  
47 6 0.00 0.00 -0.00 0.02 0.03 -0.11 0.03 -0.08 0.01  
48 6 0.00 -0.00 0.00 -0.04 -0.02 -0.15 -0.02 0.04 0.09  
49 1 -0.00 -0.00 0.00 -0.05 -0.04 -0.09 -0.05 0.10 0.07  
50 6 0.00 0.00 0.00 0.01 0.03 -0.16 0.03 -0.08 0.04  
51 1 0.00 0.00 0.00 0.04 0.04 -0.10 0.05 -0.13 -0.03  
52 6 0.00 0.00 0.00 -0.02 0.01 -0.18 0.01 -0.02 0.08  
53 1 0.00 0.00 0.00 -0.06 -0.04 -0.17 -0.04 0.09 0.12  
54 1 0.00 0.00 -0.00 0.03 0.05 -0.17 0.05 -0.13 0.03  
55 1 0.00 -0.00 0.00 -0.02 0.01 -0.21 0.01 -0.02 0.10  
56 6 0.00 0.00 -0.00 0.00 0.00 -0.09 -0.01 -0.01 -0.01  
57 6 0.00 0.00 0.00 -0.02 -0.02 -0.11 -0.07 0.05 0.03  
58 6 -0.00 0.00 0.00 0.02 0.03 -0.11 0.04 -0.06 -0.05  
59 6 0.00 0.00 -0.00 -0.03 -0.02 -0.15 -0.07 0.05 0.03  
60 1 0.00 0.00 -0.00 -0.04 -0.04 -0.09 -0.11 0.09 0.06  
61 6 -0.00 -0.00 -0.00 0.01 0.03 -0.15 0.04 -0.06 -0.05  
62 1 -0.00 0.00 0.00 0.04 0.05 -0.09 0.09 -0.10 -0.08  
63 6 -0.00 -0.00 -0.00 -0.01 0.01 -0.17 -0.01 -0.00 -0.01

64 1 0.00 0.00 0.00 -0.05 -0.03 -0.16 -0.11 0.09 0.06  
65 1 -0.00 -0.00 -0.00 0.03 0.05 -0.16 0.08 -0.10 -0.08  
66 1 -0.00 -0.00 -0.00 -0.01 0.01 -0.20 -0.01 -0.00 -0.01  
67 6 -0.00 0.00 0.00 0.00 -0.00 0.08 -0.01 -0.01 0.00  
68 6 0.00 -0.00 -0.00 -0.02 0.02 0.10 0.05 0.07 -0.02  
69 6 0.00 0.00 0.00 0.02 -0.02 0.10 -0.06 -0.09 0.04  
70 6 -0.00 0.00 -0.00 -0.02 0.02 0.13 0.06 0.08 -0.00  
71 1 -0.00 0.00 -0.00 -0.03 0.03 0.08 0.10 0.13 -0.04  
72 6 0.00 -0.00 0.00 0.02 -0.01 0.13 -0.06 -0.08 0.05  
73 1 -0.00 0.00 0.00 0.04 -0.03 0.09 -0.11 -0.15 0.05  
74 6 0.00 -0.00 -0.00 0.00 0.01 0.15 0.00 0.00 0.03  
75 1 0.00 -0.00 0.00 -0.03 0.04 0.14 0.10 0.14 -0.02  
76 1 0.00 -0.00 0.00 0.04 -0.03 0.15 -0.10 -0.14 0.08  
77 1 -0.00 -0.00 0.00 0.00 0.01 0.17 0.00 0.01 0.05  
78 6 -0.07 -0.03 -0.02 -0.04 0.04 0.01 0.05 0.14 -0.07  
79 1 -0.00 -0.01 -0.02 -0.03 0.06 0.00 0.04 0.17 -0.08  
80 1 0.13 0.98 0.05 -0.04 0.03 0.02 0.06 0.11 -0.06  
81 1 -0.01 -0.01 0.01 -0.04 0.02 0.00 0.05 0.14 -0.08  
82 8 0.04 -0.04 0.02 -0.04 0.03 0.04 0.08 0.13 -0.05  
83 1 -0.02 -0.01 -0.01 -0.04 0.02 -0.03 0.05 0.09 -0.05  
84 6 0.00 -0.00 0.00 -0.04 0.02 -0.01 0.09 0.10 0.05  
85 1 -0.00 0.00 0.00 -0.03 0.02 -0.01 0.02 0.10 0.06  
86 1 0.00 0.01 -0.00 -0.04 0.02 0.00 0.11 0.10 -0.02  
87 1 -0.00 -0.00 -0.00 -0.05 0.02 -0.02 0.14 0.10 0.11  
88 8 -0.00 0.00 -0.00 -0.03 0.02 0.00 0.04 0.07 -0.02  
89 1 0.02 -0.00 0.01 -0.03 0.02 0.00 0.04 0.08 0.04

TMeOH-INT3

-----  
Center Atomic Atomic Coordinates (Angstroms)

Number Number Type X Y Z  
-----

1 7 0 1.133895 -1.529971 -0.426377  
2 7 0 -1.732950 -1.289661 -0.266296  
3 7 0 -1.496470 1.583553 -0.222721  
4 7 0 1.370416 1.337644 -0.376831  
5 6 0 2.500769 -1.441622 -0.529505  
6 6 0 3.070223 -2.771425 -0.602096  
7 6 0 2.028287 -3.651853 -0.552999  
8 6 0 0.819110 -2.865534 -0.427766  
9 6 0 -0.465448 -3.416478 -0.304594  
10 6 0 -1.642154 -2.658369 -0.218398  
11 6 0 -2.961462 -3.231693 -0.044232

12 6 0 -3.840984 -2.191558 0.000546  
13 6 0 -3.063040 -0.976711 -0.141348  
14 6 0 -3.619746 0.312034 -0.121913  
15 6 0 -2.868299 1.495858 -0.176229  
16 6 0 -3.441688 2.824548 -0.184625  
17 6 0 -2.400996 3.706923 -0.216167  
18 6 0 -1.185160 2.923022 -0.250192  
19 6 0 0.106742 3.469440 -0.291470  
20 6 0 1.283859 2.708169 -0.354100  
21 6 0 2.609370 3.284091 -0.460500  
22 6 0 3.486593 2.243966 -0.540181  
23 6 0 2.703129 1.027675 -0.480637  
24 6 0 3.255823 -0.258969 -0.543385  
25 1 0 4.130130 -2.994321 -0.684355  
26 1 0 2.066477 -4.736655 -0.595842  
27 1 0 -3.174803 -4.292981 0.045951  
28 1 0 -4.917957 -2.231729 0.136143  
29 1 0 -4.504881 3.046635 -0.168853  
30 1 0 -2.445545 4.792265 -0.220127  
31 1 0 2.827471 4.347816 -0.491070  
32 1 0 4.566664 2.286536 -0.647222  
33 29 0 -0.173005 0.013824 -0.249714  
34 6 0 -5.106240 0.430481 -0.030327  
35 6 0 -5.714993 0.954193 1.121550  
36 6 0 -5.923270 0.017796 -1.095153  
37 6 0 -7.104747 1.063032 1.206848  
38 1 0 -5.087090 1.270196 1.957402  
39 6 0 -7.313075 0.127099 -1.011304  
40 1 0 -5.456952 -0.386766 -1.996072  
41 6 0 -7.908187 0.650160 0.140199  
42 1 0 -7.562242 1.467999 2.112835  
43 1 0 -7.933830 -0.194525 -1.851152  
44 1 0 -8.995473 0.735307 0.206425  
45 6 0 0.238123 4.958361 -0.278180  
46 6 0 -0.149216 5.722680 -1.390194  
47 6 0 0.755625 5.619834 0.846660  
48 6 0 -0.024044 7.113740 -1.377264  
49 1 0 -0.546041 5.214494 -2.271745  
50 6 0 0.881718 7.010810 0.860678  
51 1 0 1.057640 5.032021 1.716366  
52 6 0 0.491646 7.762127 -0.251481  
53 1 0 -0.326601 7.693405 -2.252798  
54 1 0 1.283366 7.510147 1.745829  
55 1 0 0.590010 8.850252 -0.241225

56 6 0 -0.582794 -4.904571 -0.243222  
 57 6 0 -0.114304 -5.607324 0.878663  
 58 6 0 -1.162864 -5.626201 -1.298195  
 59 6 0 -0.222389 -6.998187 0.943326  
 60 1 0 0.329221 -5.048862 1.706077  
 61 6 0 -1.270321 -7.017467 -1.234572  
 62 1 0 -1.525861 -5.085704 -2.175108  
 63 6 0 -0.800283 -7.707503 -0.113595  
 64 1 0 0.142254 -7.530019 1.825568  
 65 1 0 -1.720265 -7.565245 -2.066215  
 66 1 0 -0.884801 -8.795718 -0.063435  
 67 6 0 4.743956 -0.377757 -0.603027  
 68 6 0 5.524771 -0.032546 0.512164  
 69 6 0 5.387730 -0.835309 -1.763299  
 70 6 0 6.916190 -0.144526 0.467138  
 71 1 0 5.027939 0.322636 1.416651  
 72 6 0 6.779441 -0.946877 -1.808290  
 73 1 0 4.786520 -1.098294 -2.636417  
 74 6 0 7.547932 -0.602435 -0.692687  
 75 1 0 7.509667 0.125200 1.344294  
 76 1 0 7.265896 -1.300226 -2.720794  
 77 1 0 8.636560 -0.689349 -0.727830  
 78 6 0 3.348830 0.685432 3.617414  
 79 1 0 2.361096 -0.556877 2.509612  
 80 1 0 3.633905 1.735709 3.695766  
 81 1 0 3.997991 -0.108737 3.998035  
 82 8 0 2.528745 0.407296 2.569956  
 83 1 0 0.646395 0.731551 2.302262  
 84 6 0 1.482930 -2.407725 2.841013  
 85 1 0 2.071020 -2.949617 2.098534  
 86 1 0 0.610469 -1.828932 2.530325  
 87 1 0 1.674504 -2.568878 3.904126  
 88 8 0 -0.239797 0.340435 2.190593  
 89 1 0 -0.814073 1.074585 1.930495

TMeOH-TS3

-----  
 Center Atomic Atomic Coordinates (Angstroms)

Number Number Type X Y Z

-----  
 1 7 0 1.261494 -1.422322 -0.399889  
 2 7 0 -1.618678 -1.403589 -0.279091  
 3 7 0 -1.603279 1.478271 -0.215030

4 7 0 1.275740 1.451483 -0.358742  
5 6 0 2.619407 -1.231059 -0.501227  
6 6 0 3.288040 -2.513910 -0.569346  
7 6 0 2.315020 -3.470088 -0.526809  
8 6 0 1.049067 -2.778407 -0.408589  
9 6 0 -0.190721 -3.426172 -0.304926  
10 6 0 -1.423232 -2.761065 -0.234094  
11 6 0 -2.696553 -3.435513 -0.080415  
12 6 0 -3.654074 -2.466578 -0.042490  
13 6 0 -2.970066 -1.194581 -0.168132  
14 6 0 -3.623928 0.047496 -0.143769  
15 6 0 -2.964835 1.285768 -0.178995  
16 6 0 -3.637435 2.566974 -0.175760  
17 6 0 -2.666652 3.526224 -0.190379  
18 6 0 -1.394552 2.837536 -0.226994  
19 6 0 -0.147553 3.480523 -0.263296  
20 6 0 1.083648 2.811408 -0.334363  
21 6 0 2.359528 3.488446 -0.452029  
22 6 0 3.314454 2.520293 -0.539018  
23 6 0 2.628720 1.247142 -0.472783  
24 6 0 3.281101 0.007047 -0.526843  
25 1 0 4.362242 -2.654901 -0.647643  
26 1 0 2.434770 -4.548945 -0.569658  
27 1 0 -2.827839 -4.510635 0.002410  
28 1 0 -4.726381 -2.590025 0.079109  
29 1 0 -4.714517 2.707372 -0.164093  
30 1 0 -2.793754 4.604956 -0.181983  
31 1 0 2.493908 4.565872 -0.483414  
32 1 0 4.387384 2.645693 -0.652444  
33 29 0 -0.164724 0.015706 -0.238679  
34 6 0 -5.115923 0.050950 -0.066012  
35 6 0 -5.773573 0.510835 1.086170  
36 6 0 -5.888628 -0.408838 -1.144451  
37 6 0 -7.168316 0.511696 1.158386  
38 1 0 -5.179576 0.862467 1.932516  
39 6 0 -7.283454 -0.407324 -1.073666  
40 1 0 -5.384121 -0.764653 -2.045371  
41 6 0 -7.927632 0.053044 0.078196  
42 1 0 -7.664024 0.867998 2.064703  
43 1 0 -7.869832 -0.764273 -1.923871  
44 1 0 -9.018808 0.053738 0.134240  
45 6 0 -0.128927 4.974897 -0.238596  
46 6 0 -0.582495 5.717059 -1.340560  
47 6 0 0.347945 5.663905 0.887720



48 6 0 -0.561877 7.113415 -1.316229  
49 1 0 -0.947568 5.187893 -2.223478  
50 6 0 0.369109 7.060233 0.913143  
51 1 0 0.702143 5.093139 1.749030  
52 6 0 -0.086408 7.789298 -0.188905  
53 1 0 -0.914617 7.675967 -2.184102  
54 1 0 0.740456 7.580956 1.799182  
55 1 0 -0.069881 8.881610 -0.169746  
56 6 0 -0.194971 -4.919304 -0.249843  
57 6 0 0.295590 -5.587478 0.883556  
58 6 0 -0.689805 -5.678424 -1.321620  
59 6 0 0.292419 -6.982849 0.942271  
60 1 0 0.671380 -4.998630 1.723442  
61 6 0 -0.691800 -7.074105 -1.263585  
62 1 0 -1.070074 -5.163661 -2.206717  
63 6 0 -0.200464 -7.730212 -0.131395  
64 1 0 0.672654 -7.488664 1.833187  
65 1 0 -1.076046 -7.651593 -2.107983  
66 1 0 -0.202532 -8.821910 -0.085558  
67 6 0 4.773999 0.003126 -0.599761  
68 6 0 5.539639 0.399485 0.508892  
69 6 0 5.435234 -0.397000 -1.771455  
70 6 0 6.935043 0.392951 0.445049  
71 1 0 5.033296 0.707697 1.426722  
72 6 0 6.830572 -0.402021 -1.834845  
73 1 0 4.844197 -0.700280 -2.638482  
74 6 0 7.584662 -0.007385 -0.726017  
75 1 0 7.517224 0.699940 1.317430  
76 1 0 7.330639 -0.711765 -2.755788  
77 1 0 8.676231 -0.011305 -0.775061  
78 6 0 3.292598 0.536621 3.541070  
79 1 0 2.364778 -0.197513 2.021252  
80 1 0 3.302023 1.398800 4.210005  
81 1 0 3.575757 -0.458588 3.896063  
82 8 0 2.383373 0.628680 2.533311  
83 1 0 0.478869 0.719265 2.433807  
84 6 0 1.489440 -2.437151 2.879772  
85 1 0 2.183054 -2.855309 2.149170  
86 1 0 0.628731 -1.851645 2.552671  
87 1 0 1.646411 -2.626431 3.943103  
88 8 0 -0.361236 0.275333 2.216451  
89 1 0 -0.961778 0.981461 1.938059

\*\*\*\*\* 1 imaginary frequencies (negative Signs) \*\*\*\*\*

Diagonal vibrational polarizability:

58.8603604 40.0506754 182.5204725

Harmonic frequencies (cm<sup>-1</sup>), IR intensities (KM/Mole), Raman scattering activities (A<sup>4</sup>/AMU), depolarization ratios for plane and unpolarized incident light, reduced masses (AMU), force constants (mDyne/A), and normal coordinates:

1 2 3

A A A

Frequencies -- -89.7162 8.3886 24.3202

Red. masses -- 1.6542 5.9194 5.0820

Frc consts -- 0.0078 0.0002 0.0018

IR Inten -- 6.4776 0.0171 0.1431

Atom AN X Y Z X Y Z X Y Z

|    |   |       |      |       |       |       |       |       |       |       |
|----|---|-------|------|-------|-------|-------|-------|-------|-------|-------|
| 1  | 7 | 0.00  | 0.00 | 0.01  | -0.00 | -0.00 | 0.01  | -0.01 | -0.01 | -0.06 |
| 2  | 7 | -0.00 | 0.00 | -0.00 | -0.00 | -0.00 | -0.00 | -0.01 | -0.01 | -0.06 |
| 3  | 7 | -0.00 | 0.00 | -0.00 | -0.00 | -0.00 | 0.00  | -0.00 | -0.01 | -0.05 |
| 4  | 7 | 0.00  | 0.00 | -0.01 | -0.00 | -0.00 | 0.00  | -0.00 | -0.01 | -0.07 |
| 5  | 6 | 0.00  | 0.00 | 0.01  | -0.00 | -0.00 | -0.02 | -0.00 | -0.01 | -0.04 |
| 6  | 6 | 0.00  | 0.00 | 0.01  | -0.01 | -0.00 | -0.01 | -0.00 | -0.02 | -0.01 |
| 7  | 6 | 0.00  | 0.00 | 0.01  | -0.00 | -0.00 | 0.03  | -0.01 | -0.01 | -0.01 |
| 8  | 6 | 0.00  | 0.00 | 0.01  | -0.00 | -0.00 | 0.03  | -0.01 | -0.01 | -0.04 |
| 9  | 6 | 0.00  | 0.00 | 0.00  | -0.00 | -0.00 | 0.05  | -0.01 | -0.01 | -0.04 |
| 10 | 6 | 0.00  | 0.00 | -0.00 | -0.00 | -0.00 | 0.03  | -0.01 | -0.01 | -0.06 |
| 11 | 6 | 0.00  | 0.00 | -0.00 | -0.01 | 0.00  | 0.02  | -0.01 | -0.01 | -0.07 |
| 12 | 6 | 0.00  | 0.00 | -0.00 | -0.01 | 0.00  | -0.02 | -0.01 | -0.01 | -0.06 |
| 13 | 6 | 0.00  | 0.00 | -0.00 | -0.00 | -0.00 | -0.03 | -0.01 | -0.01 | -0.05 |
| 14 | 6 | 0.00  | 0.00 | -0.00 | -0.01 | 0.00  | -0.05 | -0.00 | -0.01 | -0.03 |
| 15 | 6 | 0.00  | 0.00 | -0.00 | -0.00 | -0.00 | -0.03 | -0.00 | -0.01 | -0.02 |
| 16 | 6 | -0.00 | 0.00 | 0.00  | -0.00 | 0.00  | -0.02 | -0.00 | -0.01 | 0.02  |
| 17 | 6 | -0.00 | 0.00 | 0.00  | 0.00  | -0.00 | 0.02  | 0.00  | -0.01 | 0.03  |
| 18 | 6 | -0.00 | 0.00 | -0.00 | -0.00 | -0.00 | 0.03  | -0.00 | -0.01 | -0.02 |
| 19 | 6 | -0.00 | 0.00 | -0.00 | 0.00  | -0.00 | 0.05  | 0.00  | -0.01 | -0.03 |
| 20 | 6 | 0.00  | 0.00 | -0.01 | -0.00 | -0.00 | 0.03  | -0.00 | -0.01 | -0.07 |
| 21 | 6 | -0.00 | 0.00 | -0.02 | -0.00 | -0.00 | 0.03  | -0.00 | -0.01 | -0.09 |
| 22 | 6 | -0.00 | 0.01 | -0.02 | -0.00 | -0.00 | -0.01 | -0.00 | -0.01 | -0.09 |
| 23 | 6 | 0.00  | 0.01 | -0.01 | -0.00 | -0.00 | -0.02 | -0.00 | -0.01 | -0.07 |
| 24 | 6 | 0.00  | 0.00 | 0.00  | -0.01 | -0.00 | -0.04 | -0.00 | -0.01 | -0.04 |
| 25 | 1 | 0.00  | 0.00 | 0.02  | -0.01 | -0.00 | -0.03 | -0.00 | -0.02 | 0.02  |
| 26 | 1 | 0.00  | 0.00 | 0.02  | -0.00 | -0.00 | 0.04  | -0.01 | -0.01 | 0.01  |
| 27 | 1 | 0.00  | 0.00 | -0.00 | -0.01 | 0.00  | 0.03  | -0.01 | -0.01 | -0.07 |
| 28 | 1 | 0.00  | 0.00 | -0.00 | -0.01 | 0.00  | -0.04 | -0.01 | -0.00 | -0.07 |
| 29 | 1 | -0.00 | 0.00 | 0.01  | -0.00 | 0.00  | -0.04 | 0.00  | -0.00 | 0.05  |
| 30 | 1 | -0.00 | 0.00 | 0.01  | 0.00  | -0.00 | 0.04  | 0.00  | -0.01 | 0.05  |
| 31 | 1 | -0.00 | 0.00 | -0.02 | -0.00 | -0.00 | 0.05  | -0.00 | -0.01 | -0.10 |
| 32 | 1 | -0.00 | 0.01 | -0.02 | -0.01 | -0.00 | -0.02 | -0.01 | -0.01 | -0.10 |

33 29 -0.00 0.00 0.01 -0.00 -0.00 0.00 -0.00 -0.01 -0.06  
34 6 0.00 0.00 -0.00 -0.01 -0.00 -0.09 -0.00 -0.00 0.01  
35 6 0.00 0.00 -0.00 -0.04 -0.00 -0.11 0.03 -0.05 0.05  
36 6 0.00 0.00 -0.00 0.02 -0.00 -0.11 -0.03 0.04 0.01  
37 6 0.00 -0.00 0.00 -0.04 -0.01 -0.15 0.04 -0.05 0.09  
38 1 0.00 -0.00 -0.00 -0.07 -0.00 -0.09 0.06 -0.08 0.04  
39 6 0.00 0.00 -0.00 0.02 -0.01 -0.15 -0.03 0.04 0.06  
40 1 -0.00 0.00 -0.00 0.05 -0.00 -0.09 -0.06 0.08 -0.01  
41 6 0.00 -0.00 0.00 -0.01 -0.01 -0.17 0.00 -0.00 0.09  
42 1 0.00 -0.00 0.00 -0.07 -0.01 -0.16 0.06 -0.09 0.12  
43 1 0.00 0.00 0.00 0.05 -0.01 -0.17 -0.06 0.08 0.06  
44 1 0.00 -0.00 0.00 -0.01 -0.01 -0.20 0.01 -0.01 0.13  
45 6 -0.00 0.00 -0.00 0.01 -0.00 0.09 0.01 -0.01 0.02  
46 6 -0.00 0.00 0.00 0.01 0.03 0.11 -0.05 0.03 0.07  
47 6 0.00 0.00 -0.00 0.01 -0.04 0.11 0.07 -0.05 0.02  
48 6 -0.00 0.00 0.00 0.02 0.03 0.15 -0.04 0.03 0.12  
49 1 -0.00 0.00 0.00 0.01 0.06 0.09 -0.09 0.07 0.07  
50 6 0.00 0.00 -0.00 0.01 -0.04 0.15 0.07 -0.06 0.07  
51 1 0.00 -0.00 -0.00 0.00 -0.07 0.10 0.11 -0.09 -0.02  
52 6 -0.00 0.00 0.00 0.02 -0.01 0.17 0.02 -0.01 0.13  
53 1 -0.00 0.00 0.00 0.03 0.06 0.17 -0.08 0.07 0.16  
54 1 0.00 -0.00 -0.00 0.01 -0.07 0.17 0.12 -0.09 0.08  
55 1 0.00 0.00 0.00 0.02 -0.01 0.21 0.02 -0.01 0.17  
56 6 0.00 0.00 0.00 0.00 0.00 0.08 -0.01 -0.01 -0.01  
57 6 0.00 0.00 0.00 0.01 0.03 0.10 -0.02 0.03 0.02  
58 6 0.00 0.00 0.00 0.00 -0.03 0.10 0.01 -0.04 0.01  
59 6 0.00 0.00 0.00 0.01 0.03 0.13 -0.02 0.03 0.06  
60 1 0.01 0.01 0.00 0.01 0.05 0.08 -0.03 0.05 0.01  
61 6 0.00 0.00 0.00 0.01 -0.03 0.14 0.01 -0.04 0.05  
62 1 -0.00 0.00 0.00 0.00 -0.05 0.09 0.02 -0.07 -0.01  
63 6 0.00 0.00 0.00 0.01 0.00 0.15 -0.01 -0.00 0.08  
64 1 0.00 0.00 0.00 0.01 0.05 0.14 -0.04 0.05 0.08  
65 1 -0.00 0.00 0.01 0.01 -0.05 0.15 0.02 -0.06 0.06  
66 1 0.00 0.00 0.01 0.02 0.00 0.18 -0.01 -0.00 0.11  
67 6 0.00 0.00 -0.00 -0.01 -0.01 -0.08 -0.00 -0.01 0.01  
68 6 0.01 0.01 -0.01 0.02 -0.01 -0.10 -0.05 0.06 0.02  
69 6 0.00 -0.01 0.00 -0.04 -0.00 -0.09 0.05 -0.08 0.06  
70 6 0.01 0.01 -0.01 0.02 -0.02 -0.13 -0.04 0.05 0.08  
71 1 0.01 0.03 -0.01 0.05 -0.01 -0.08 -0.08 0.12 -0.02  
72 6 0.00 -0.01 0.00 -0.04 -0.01 -0.13 0.05 -0.09 0.12  
73 1 -0.00 -0.01 0.01 -0.07 -0.00 -0.08 0.09 -0.14 0.05  
74 6 0.00 -0.00 -0.00 -0.01 -0.01 -0.15 0.01 -0.02 0.13  
75 1 0.01 0.02 -0.01 0.05 -0.02 -0.15 -0.08 0.11 0.08  
76 1 -0.00 -0.01 0.00 -0.07 -0.01 -0.15 0.09 -0.14 0.16

```

77 1 0.00 -0.00 -0.00 -0.01 -0.02 -0.18 0.01 -0.02 0.17
78 6 -0.05 -0.13 -0.01 0.06 0.06 -0.10 -0.10 0.16 0.06
79 1 0.19 0.35 -0.39 -0.03 0.05 -0.05 0.08 0.12 -0.03
80 1 -0.22 -0.38 0.32 0.08 0.05 -0.09 -0.18 0.18 0.04
81 1 0.03 -0.23 -0.35 0.12 0.07 -0.14 -0.14 0.17 0.12
82 8 -0.00 0.13 -0.03 -0.02 0.04 -0.03 0.02 0.14 -0.05
83 1 0.03 -0.09 0.04 -0.03 0.01 0.02 0.02 0.04 -0.09
84 6 -0.02 -0.08 0.05 0.04 0.04 0.02 0.09 0.08 -0.04
85 1 0.08 0.09 0.05 0.04 0.03 0.02 0.08 0.08 -0.05
86 1 0.06 0.05 0.08 0.03 0.01 0.02 0.09 0.08 -0.03
87 1 -0.14 -0.30 0.03 0.07 0.07 0.03 0.09 0.06 -0.04
88 8 0.01 -0.03 -0.02 -0.02 -0.01 0.01 0.03 0.01 -0.06
89 1 0.04 0.02 0.06 -0.03 -0.02 0.00 0.00 -0.01 -0.05

```

TMeOH-P

-----  
Center Atomic Atomic Coordinates (Angstroms)

Number Number Type X Y Z

-----

```

1 7 0 0.297962 2.061078 -0.337908
2 7 0 2.125458 -0.146121 -0.362743
3 7 0 -0.080369 -1.976222 -0.489379
4 7 0 -1.903407 0.233367 -0.523973
5 6 0 -0.726337 2.971728 -0.215527
6 6 0 -0.183482 4.287403 0.043779
7 6 0 1.174157 4.162245 0.046887
8 6 0 1.469199 2.767116 -0.199660
9 6 0 2.769110 2.244144 -0.275450
10 6 0 3.050081 0.876640 -0.396999
11 6 0 4.378521 0.326742 -0.542217
12 6 0 4.248780 -1.032108 -0.559564
13 6 0 2.840290 -1.321680 -0.441562
14 6 0 2.308439 -2.614084 -0.357045
15 6 0 0.936340 -2.894104 -0.353471
16 6 0 0.382503 -4.222074 -0.204988
17 6 0 -0.974136 -4.095175 -0.271986
18 6 0 -1.257478 -2.689116 -0.459147
19 6 0 -2.548588 -2.157477 -0.570854
20 6 0 -2.818380 -0.785095 -0.660864
21 6 0 -4.144422 -0.231378 -0.817180
22 6 0 -4.021005 1.126199 -0.733677
23 6 0 -2.617004 1.409610 -0.531971
24 6 0 -2.095450 2.695347 -0.327374

```

25 1 0 -0.773286 5.183786 0.211921  
26 1 0 1.916943 4.935561 0.220032  
27 1 0 5.289403 0.912634 -0.624677  
28 1 0 5.030569 -1.780812 -0.652832  
29 1 0 0.966317 -5.126959 -0.061316  
30 1 0 -1.725253 -4.875551 -0.191000  
31 1 0 -5.048317 -0.814375 -0.967472  
32 1 0 -4.803881 1.875270 -0.809108  
33 29 0 0.106444 0.045632 -0.434801  
34 6 0 3.265863 -3.739885 -0.151019  
35 6 0 3.926668 -3.843388 1.084592  
36 6 0 3.513005 -4.698281 -1.143908  
37 6 0 4.823461 -4.887748 1.317853  
38 1 0 3.707522 -3.101416 1.856764  
39 6 0 4.413929 -5.740494 -0.909424  
40 1 0 2.999425 -4.618100 -2.104696  
41 6 0 5.070670 -5.836803 0.320847  
42 1 0 5.328448 -4.962995 2.283933  
43 1 0 4.605293 -6.479093 -1.691658  
44 1 0 5.774083 -6.652831 0.503188  
45 6 0 -3.709686 -3.092711 -0.507253  
46 6 0 -3.960394 -4.017074 -1.532671  
47 6 0 -4.562851 -3.057254 0.609483  
48 6 0 -5.047933 -4.889768 -1.448064  
49 1 0 -3.300125 -4.042774 -2.402526  
50 6 0 -5.646856 -3.933958 0.691730  
51 1 0 -4.355896 -2.341493 1.409854  
52 6 0 -5.893018 -4.850455 -0.335247  
53 1 0 -5.237546 -5.600898 -2.255802  
54 1 0 -6.300864 -3.902867 1.566604  
55 1 0 -6.742755 -5.534253 -0.268653  
56 6 0 3.916787 3.195842 -0.207689  
57 6 0 4.816001 3.157116 0.870630  
58 6 0 4.117146 4.149060 -1.219508  
59 6 0 5.888088 4.049475 0.935631  
60 1 0 4.661957 2.424699 1.665936  
61 6 0 5.190777 5.039729 -1.156097  
62 1 0 3.425556 4.181494 -2.064105  
63 6 0 6.079161 4.992868 -0.077960  
64 1 0 6.574695 4.010411 1.784698  
65 1 0 5.336199 5.771216 -1.954676  
66 1 0 6.918513 5.690477 -0.027516  
67 6 0 -3.061900 3.824305 -0.191578  
68 6 0 -3.937065 3.871335 0.906335

69 6 0 -3.116734 4.852541 -1.145642  
70 6 0 -4.844496 4.923112 1.047041  
71 1 0 -3.893866 3.077182 1.655298  
72 6 0 -4.026337 5.903223 -1.006081  
73 1 0 -2.443914 4.817862 -2.005197  
74 6 0 -4.891953 5.941726 0.090764  
75 1 0 -5.514620 4.948678 1.909614  
76 1 0 -4.061810 6.693376 -1.759973  
77 1 0 -5.602720 6.764270 0.200066  
78 6 0 -1.849456 -0.657099 2.747824  
79 1 0 -1.799321 -1.292606 3.646555  
80 1 0 1.846042 -0.788408 1.758268  
81 1 0 -1.365124 -1.221708 1.929093  
82 8 0 -3.230914 -0.467461 2.482777  
83 1 0 -3.313839 0.038726 1.663591  
84 6 0 -1.092026 0.640790 2.982660  
85 1 0 -1.118924 1.279057 2.085118  
86 1 0 -0.038175 0.415091 3.206699  
87 1 0 -1.529518 1.206175 3.820474  
88 8 0 1.726640 -1.321270 2.560577  
89 1 0 1.146649 -2.033522 2.257642

ZCO<sub>2</sub>-R

-----  
Center Atomic Atomic Coordinates (Angstroms)

Number Number Type X Y Z

-----  
1 40 0 -0.008162 0.010592 -2.044058  
2 8 0 -1.626423 -1.378856 -1.381508  
3 40 0 1.765312 0.000454 -0.125109  
4 8 0 0.911524 -1.395870 1.406623  
5 40 0 -0.319749 2.258287 -0.002204  
6 8 0 -1.778954 1.351002 1.316268  
7 40 0 -0.415607 -0.011382 2.150052  
8 8 0 0.911645 1.380715 1.421185  
9 40 0 -0.319953 -2.258359 -0.025885  
10 8 0 1.122031 -1.687203 -1.340867  
11 40 0 -2.493031 0.000627 -0.121388  
12 8 0 -1.626291 1.393161 -1.366980  
13 8 0 1.122186 1.700822 -1.323103  
14 8 0 -1.779068 -1.364821 1.302036  
15 6 0 3.985024 -0.005695 0.490428  
16 8 0 4.923230 -0.021474 1.225706  
17 8 0 3.787301 0.025705 -0.784218

ZCO<sub>2</sub>-TS1

-----  
Center Atomic Atomic Coordinates (Angstroms)

Number Number Type X Y Z

-----  
1 40 0 0.007035 -0.002991 -2.042125  
2 8 0 -1.613996 -1.386870 -1.376512  
3 40 0 1.774085 0.000259 -0.116934  
4 8 0 0.914141 -1.387253 1.420396  
5 40 0 -0.311084 2.258437 -0.015222  
6 8 0 -1.775017 1.359907 1.303824  
7 40 0 -0.415076 0.001746 2.150672  
8 8 0 0.915104 1.389319 1.417867  
9 40 0 -0.312685 -2.258100 -0.010967  
10 8 0 1.134028 -1.695605 -1.324403  
11 40 0 -2.484588 0.000766 -0.127951  
12 8 0 -1.613121 1.385215 -1.379194  
13 8 0 1.135239 1.692430 -1.327619  
14 8 0 -1.776014 -1.355988 1.306343  
15 6 0 3.865589 -0.000025 0.787334  
16 8 0 4.987922 -0.000304 1.095029  
17 8 0 3.504089 -0.001416 -0.913596

\*\*\*\*\* 1 imaginary frequencies (negative Signs) \*\*\*\*\*

Diagonal vibrational polarizability:

41.2400896 20.0457063 37.8007498

Harmonic frequencies (cm<sup>-1</sup>), IR intensities (KM/Mole), Raman scattering activities (A<sup>4</sup>/AMU), depolarization ratios for plane and unpolarized incident light, reduced masses (AMU), force constants (mDyne/A), and normal coordinates:

1 2 3

A A A

Frequencies -- -401.3504 47.1907 61.0022

Red. masses -- 13.4994 15.0119 15.1631

Frc consts -- 1.2812 0.0197 0.0332

IR Inten -- 139.8313 1.1088 3.6610

Atom AN X Y Z X Y Z X Y Z

15 6 0.07 0.00 0.79 0.00 0.50 -0.00 -0.23 0.00 0.40  
16 8 0.14 -0.00 0.07 0.00 0.87 -0.00 -0.31 0.00 0.72  
17 8 -0.44 -0.00 -0.39 -0.00 0.03 -0.00 0.19 0.00 0.38

ZCO<sub>2</sub>-P

-----  
Center Atomic Atomic Coordinates (Angstroms)

Number Number Type X Y Z

-----  
1 40 0 -0.746698 -0.004385 2.006108  
2 8 0 -2.024701 1.383928 0.811565  
3 40 0 1.589861 -0.001737 0.836501  
4 8 0 1.333769 1.390630 -0.901815  
5 40 0 -0.321445 -2.258410 -0.008110  
6 8 0 -1.220106 -1.354364 -1.759131  
7 40 0 0.352024 0.004850 -2.061949  
8 8 0 1.334407 -1.385973 -0.907882  
9 40 0 -0.322502 2.258313 0.001635  
10 8 0 0.561816 1.690499 1.742303  
11 40 0 -2.393272 0.000940 -0.669588  
12 8 0 -2.024093 -1.388198 0.805489  
13 8 0 0.562589 -1.697597 1.735161  
14 8 0 -1.220739 1.361469 -1.753237  
15 6 0 4.331909 0.003291 -1.193331  
16 8 0 5.440483 0.002368 -0.971543  
17 8 0 3.217803 -0.003091 1.571104

ZCO-R

-----  
Center Atomic Atomic Coordinates (Angstroms)

Number Number Type X Y Z

-----  
1 40 0 0.144348 0.552022 -1.956737  
2 8 0 -0.817972 -1.454436 -1.771178  
3 40 0 1.685771 0.797996 0.138860  
4 8 0 1.385850 -1.115905 1.268918  
5 40 0 -1.128021 2.011728 0.403289  
6 8 0 -2.166448 0.356403 1.336339  
7 40 0 -0.414336 -0.535161 2.075666  
8 8 0 0.283208 1.378652 1.788637  
9 40 0 0.665926 -2.046237 -0.441758  
10 8 0 1.821753 -0.700310 -1.435475  
11 40 0 -2.218431 -0.815709 -0.402512  
12 8 0 -1.918903 1.036552 -1.252500  
13 8 0 0.476354 2.343917 -0.801671  
14 8 0 -1.087908 -2.083685 0.828038  
15 6 0 3.902917 0.187260 0.499864  
16 8 0 5.025567 0.043140 0.644561  
17 1 0 3.160226 1.856241 -0.516857

ZCO-TS1



-----  
Center Atomic Atomic Coordinates (Angstroms)

Number Number Type X Y Z  
-----

1 40 0 0.381333 0.120566 -1.970741  
2 8 0 -1.178339 -1.437085 -1.613550  
3 40 0 1.827485 0.190685 0.204419  
4 8 0 0.883464 -1.342641 1.541407  
5 40 0 -0.460179 2.241240 0.057624  
6 8 0 -2.012376 1.149578 1.100736  
7 40 0 -0.670530 -0.118281 2.102504  
8 8 0 0.613268 1.419123 1.633515  
9 40 0 -0.020431 -2.251426 -0.091796  
10 8 0 1.546759 -1.495749 -1.144311  
11 40 0 -2.359898 -0.197227 -0.469428  
12 8 0 -1.447971 1.320607 -1.521884  
13 8 0 1.217258 1.874423 -1.032330  
14 8 0 -1.748114 -1.551832 1.010715  
15 6 0 4.030880 0.013557 0.349882  
16 8 0 5.184720 -0.042443 0.538847  
17 1 0 3.434139 1.344503 0.492308

\*\*\*\*\* 1 imaginary frequencies (negative Signs) \*\*\*\*\*

Diagonal vibrational polarizability:

66.4693852 9.4479952 12.8016727

Harmonic frequencies (cm<sup>-1</sup>), IR intensities (KM/Mole), Raman scattering activities (A<sup>4</sup>/AMU), depolarization ratios for plane and unpolarized incident light, reduced masses (AMU), force constants (mDyne/A), and normal coordinates:

1 2 3

A A A

Frequencies -- -68.1634 51.1627 226.8148

Red. masses -- 10.2964 14.0308 6.1678

Frc consts -- 0.0282 0.0216 0.1869

IR Inten -- 2.7638 2.0664 19.7751

Atom AN X Y Z X Y Z X Y Z

15 6 0.00 0.56 -0.20 -0.03 0.20 0.40 0.22 -0.36 0.21

16 8 0.03 0.56 -0.21 -0.09 0.24 0.81 0.27 0.33 -0.06

17 1 -0.06 0.16 0.51 -0.09 0.09 0.25 -0.23 0.05 -0.74

ZCO-INT1  
-----

Center Atomic Atomic Coordinates (Angstroms)

Number Number Type X Y Z  
-----

```

1 40 0 0.571557 0.280314 -1.897283
2 8 0 -0.919746 -1.377878 -1.778976
3 40 0 1.811874 0.285018 0.402509
4 8 0 0.845340 -1.379082 1.552620
5 40 0 -0.569190 2.217486 0.167814
6 8 0 -2.141281 0.979575 0.996696
7 40 0 -0.821525 -0.277363 2.040310
8 8 0 0.406584 1.352822 1.784253
9 40 0 0.144462 -2.226569 -0.208877
10 8 0 1.751871 -1.322386 -1.065044
11 40 0 -2.268715 -0.279192 -0.676485
12 8 0 -1.357826 1.349644 -1.547730
13 8 0 1.216629 2.011235 -0.782629
14 8 0 -1.712154 -1.692561 0.770166
15 6 0 4.040473 0.510656 0.065739
16 8 0 3.901510 -0.398660 0.908097
17 1 0 5.091196 0.766669 -0.213601

```

ZCO-INT2

-----  
Center Atomic Atomic Coordinates (Angstroms)

Number Number Type X Y Z  
-----

```

1 40 0 -0.565683 -0.272432 -1.901294
2 8 0 0.916633 1.391832 -1.759612
3 40 0 -1.809636 -0.312778 0.395963
4 8 0 -0.854357 1.342265 1.568449
5 40 0 0.581732 -2.229257 0.141597
6 8 0 2.145764 -0.993437 0.988810
7 40 0 0.817378 0.243741 2.045529
8 8 0 -0.401503 -1.389883 1.766992
9 40 0 -0.154954 2.215573 -0.180980
10 8 0 -1.755950 1.313305 -1.051363
11 40 0 2.269461 0.286685 -0.668422
12 8 0 1.368815 -1.335928 -1.561518
13 8 0 -1.203522 -2.020620 -0.809467
14 8 0 1.702885 1.678901 0.794540
15 6 0 -4.041409 -0.566203 0.084992
16 8 0 -3.905477 0.373837 0.891975
17 1 0 -5.091174 -0.842319 -0.179566
18 1 0 -0.298585 4.096050 -0.256552

```

ZCO-TS2  
-----

Center Atomic Atomic Coordinates (Angstroms)

Number Number Type X Y Z

-----  
1 40 0 0.565851 -0.174188 -1.911107  
2 8 0 -1.323833 -1.322634 -1.599217  
3 40 0 1.815596 -0.226950 0.382752  
4 8 0 0.454314 -1.398704 1.724524  
5 40 0 0.059990 2.246830 -0.121720  
6 8 0 -1.772795 1.609802 0.840731  
7 40 0 -0.828291 0.175466 2.050056  
8 8 0 0.797402 1.353834 1.602226  
9 40 0 -0.498202 -2.231109 0.077665  
10 8 0 1.275149 -1.924807 -0.869038  
11 40 0 -2.286601 0.237331 -0.660188  
12 8 0 -0.981352 1.425484 -1.721449  
13 8 0 1.693961 1.433907 -1.018647  
14 8 0 -2.108432 -1.082470 0.960278  
15 6 0 4.024464 -0.345373 -0.021954  
16 8 0 3.882052 0.470391 0.911978  
17 1 0 5.072081 -0.569440 -0.332593  
18 1 0 2.315693 -2.971933 1.114909

\*\*\*\*\* 1 imaginary frequencies (negative Signs) \*\*\*\*\*

Diagonal vibrational polarizability:

17.0645428 5.7435150 9.7740356

Harmonic frequencies (cm<sup>-1</sup>), IR intensities (KM/Mole), Raman scattering activities (A<sup>4</sup>/AMU), depolarization ratios for plane and unpolarized incident light, reduced masses (AMU), force constants (mDyne/A), and normal coordinates:

1 2 3

A A A

Frequencies -- -504.0134 66.6718 81.6491

Red. masses -- 1.0105 6.6457 7.7389

Frc consts -- 0.1512 0.0174 0.0304

IR Inten -- 73.1278 0.3248 0.3963

Atom AN X Y Z X Y Z X Y Z

15 6 -0.01 0.00 -0.00 0.09 -0.04 0.49 0.05 0.44 0.06

16 8 -0.01 -0.00 0.00 -0.10 -0.01 0.43 -0.16 0.53 -0.06

17 1 -0.02 -0.03 0.01 0.15 -0.08 0.73 0.11 0.69 0.07

18 1 0.59 0.80 -0.01 0.01 0.01 0.02 -0.01 0.02 0.04

ZCO-INT3

-----  
Center Atomic Atomic Coordinates (Angstroms)

Number Number Type X Y Z

```

-----
1 40 0 -1.124161 0.000583 -1.574216
2 8 0 0.605414 1.386113 -1.852999
3 40 0 -1.626968 0.001102 0.989749
4 8 0 -0.091976 1.388280 1.852199
5 40 0 0.204897 -2.258406 -0.009883
6 8 0 2.141937 -1.359087 0.350934
7 40 0 1.423307 -0.001142 1.782331
8 8 0 -0.093551 -1.388243 1.852037
9 40 0 0.207527 2.258595 -0.009417
10 8 0 -1.711802 1.695205 -0.374755
11 40 0 1.999912 -0.000851 -1.241344
12 8 0 0.604027 -1.385950 -1.853271
13 8 0 -1.713871 -1.692841 -0.375205
14 8 0 2.143500 1.356701 0.351221
15 6 0 -3.583710 0.001023 -0.453716
16 8 0 -3.623849 -0.000701 0.928073
17 1 0 -3.978028 -0.930682 -0.897419
18 1 0 -3.978870 0.933476 -0.894948

```

ZCO-INT4

```

-----
Center Atomic Atomic Coordinates (Angstroms)

```

```

Number Number Type X Y Z
-----

```

```

1 40 0 -1.007995 -0.000480 -1.653298
2 8 0 0.734718 1.386065 -1.824433
3 40 0 -1.669043 0.000169 0.874497
4 8 0 -0.191404 1.388437 1.830309
5 40 0 0.222720 -2.258385 -0.008983
6 8 0 2.133075 -1.357814 0.471231
7 40 0 1.326130 -0.000066 1.854959
8 8 0 -0.191293 -1.388087 1.830630
9 40 0 0.222595 2.258617 -0.009298
10 8 0 -1.670004 1.693986 -0.492995
11 40 0 2.089379 0.000062 -1.127076
12 8 0 0.735021 -1.385999 -1.824212
13 8 0 -1.670000 -1.694061 -0.492865
14 8 0 2.132981 1.357974 0.471048
15 6 0 -3.886651 -0.000057 -0.223964
16 8 0 -3.685536 0.000085 1.101842
17 1 0 -4.192839 -0.945761 -0.690616
18 1 0 -4.192969 0.945513 -0.690800
19 1 0 -2.266173 -0.000803 -3.071293

```

ZCO-TS3

-----  
Center Atomic Atomic Coordinates (Angstroms)

Number Number Type X Y Z  
-----

1 40 0 1.116677 0.001418 -1.556213  
2 8 0 -0.607671 -1.386580 -1.856803  
3 40 0 1.587618 0.000040 1.014216  
4 8 0 0.043151 -1.388362 1.856773  
5 40 0 -0.234572 2.258213 -0.008590  
6 8 0 -2.174888 1.356814 0.327861  
7 40 0 -1.473036 0.000318 1.767036  
8 8 0 0.041382 1.388173 1.856912  
9 40 0 -0.231525 -2.259087 -0.008497  
10 8 0 1.691225 -1.693070 -0.349632  
11 40 0 -2.011353 -0.001311 -1.262614  
12 8 0 -0.609536 1.385329 -1.856900  
13 8 0 1.689129 1.694958 -0.349737  
14 8 0 -2.173335 -1.359235 0.327947  
15 6 0 4.180918 0.001950 -0.247298  
16 8 0 3.695732 0.001797 0.939042  
17 1 0 4.506875 0.949874 -0.697374  
18 1 0 4.506585 -0.945895 -0.697743  
19 1 0 2.987179 0.002099 -2.098367

\*\*\*\*\* 1 imaginary frequencies (negative Signs) \*\*\*\*\*

Diagonal vibrational polarizability:

130.6669269 27.1444745 21.7903263

Harmonic frequencies (cm<sup>-1</sup>), IR intensities (KM/Mole), Raman scattering activities (A<sup>4</sup>/AMU), depolarization ratios for plane and unpolarized incident light, reduced masses (AMU), force constants (mDyne/A), and normal coordinates:

1 2 3

A A A

Frequencies -- -507.6308 68.2551 147.3333

Red. masses -- 1.1240 2.6243 4.1862

Frc consts -- 0.1706 0.0072 0.0535

IR Inten -- 945.0892 2.7348 13.8859

Atom AN X Y Z X Y Z X Y Z

15 6 0.01 -0.00 -0.06 -0.00 0.36 0.00 0.22 -0.00 0.37  
16 8 0.01 0.00 -0.07 -0.00 0.10 0.00 0.01 -0.00 0.27  
17 1 0.14 -0.01 0.02 -0.40 0.52 0.04 0.29 0.00 0.42  
18 1 0.14 0.01 0.02 0.40 0.52 -0.04 0.29 -0.00 0.42  
19 1 0.42 0.00 0.88 0.00 -0.00 0.00 0.19 -0.00 0.42

ZCO-INT5

-----  
Center Atomic Atomic Coordinates (Angstroms)

Number Number Type X Y Z  
-----

|    |    |   |           |           |           |
|----|----|---|-----------|-----------|-----------|
| 1  | 40 | 0 | -0.650190 | 0.019670  | -1.855106 |
| 2  | 8  | 0 | 1.117355  | 1.377007  | -1.705897 |
| 3  | 40 | 0 | -1.754486 | 0.030645  | 0.512824  |
| 4  | 8  | 0 | -0.450138 | 1.393851  | 1.723024  |
| 5  | 40 | 0 | 0.228010  | -2.258884 | -0.023828 |
| 6  | 8  | 0 | 2.035478  | -1.390402 | 0.794652  |
| 7  | 40 | 0 | 1.015374  | -0.019756 | 2.015343  |
| 8  | 8  | 0 | -0.495479 | -1.382301 | 1.714317  |
| 9  | 40 | 0 | 0.301788  | 2.257501  | -0.009448 |
| 10 | 8  | 0 | -1.482090 | 1.724619  | -0.827074 |
| 11 | 40 | 0 | 2.301842  | -0.031562 | -0.781072 |
| 12 | 8  | 0 | 1.072286  | -1.394673 | -1.714660 |
| 13 | 8  | 0 | -1.537503 | -1.662960 | -0.837981 |
| 14 | 8  | 0 | 2.079815  | 1.325011  | 0.803306  |
| 15 | 6  | 0 | -5.061854 | -0.010039 | 0.223265  |
| 16 | 8  | 0 | -3.710702 | 0.038229  | 0.538966  |
| 17 | 1  | 0 | -5.682241 | -0.055163 | 1.138078  |
| 18 | 1  | 0 | -5.372353 | 0.885752  | -0.347810 |
| 19 | 1  | 0 | -5.299966 | -0.901926 | -0.387587 |

ZCO-INT6

-----  
Center Atomic Atomic Coordinates (Angstroms)

Number Number Type X Y Z  
-----

|    |    |   |           |           |           |
|----|----|---|-----------|-----------|-----------|
| 1  | 40 | 0 | 0.579584  | 0.051325  | -1.900567 |
| 2  | 8  | 0 | -1.129885 | -1.381610 | -1.704551 |
| 3  | 40 | 0 | 1.775405  | -0.004981 | 0.452904  |
| 4  | 8  | 0 | 0.544603  | -1.431887 | 1.666825  |
| 5  | 40 | 0 | -0.289706 | 2.244490  | 0.016129  |
| 6  | 8  | 0 | -2.042363 | 1.304599  | 0.889727  |
| 7  | 40 | 0 | -0.945437 | -0.064631 | 2.043376  |
| 8  | 8  | 0 | 0.515862  | 1.353740  | 1.720321  |
| 9  | 40 | 0 | -0.239220 | -2.274337 | -0.061627 |
| 10 | 8  | 0 | 1.502804  | -1.673455 | -0.923371 |
| 11 | 40 | 0 | -2.324134 | -0.025302 | -0.709241 |
| 12 | 8  | 0 | -1.163898 | 1.392484  | -1.648140 |
| 13 | 8  | 0 | 1.467977  | 1.687225  | -0.822678 |

```

14 8 0 -2.015287 -1.410227 0.831723
15 6 0 5.088226 0.004879 0.255495
16 1 0 5.386612 0.917041 -0.293373
17 1 0 5.665826 -0.028969 1.196996
18 1 0 5.376498 -0.872798 -0.352048
19 8 0 3.720401 0.004350 0.515750
20 1 0 -0.419722 4.131133 0.071641

```

ZCO-TS4

-----  
Center Atomic Atomic Coordinates (Angstroms)

Number Number Type X Y Z  
-----

```

1 40 0 0.625620 -0.100692 -1.862652
2 8 0 -1.154678 -1.433071 -1.649033
3 40 0 1.751255 -0.037509 0.494842
4 8 0 0.442853 -1.341918 1.764966
5 40 0 -0.214039 2.250667 -0.109439
6 8 0 -2.022231 1.432478 0.756788
7 40 0 -1.004384 0.098162 2.019598
8 8 0 0.516123 1.429738 1.656125
9 40 0 -0.333892 -2.258968 0.070490
10 8 0 1.448841 -1.775949 -0.780453
11 40 0 -2.316345 0.020516 -0.766112
12 8 0 -1.080935 1.336025 -1.759172
13 8 0 1.538822 1.608184 -0.914746
14 8 0 -2.094234 -1.279936 0.864866
15 6 0 5.049841 -0.129551 0.177243
16 1 0 5.325789 0.737815 -0.451855
17 1 0 5.693672 -0.111616 1.076141
18 1 0 5.286689 -1.050696 -0.388143
19 8 0 3.705639 -0.087443 0.529066
20 1 0 2.664598 3.209825 1.084100

```

\*\*\*\*\* 1 imaginary frequencies (negative Signs) \*\*\*\*\*

Diagonal vibrational polarizability:

41.7031757 21.2591079 23.2166747

Harmonic frequencies (cm\*\*<sup>-1</sup>), IR intensities (KM/Mole), Raman scattering activities (A\*\*<sup>4</sup>/AMU), depolarization ratios for plane and unpolarized incident light, reduced masses (AMU), force constants (mDyne/A), and normal coordinates:

1 2 3

A A A

Frequencies -- -163.5297 30.9707 40.1291

Red. masses -- 1.0081 2.9634 3.1140

```

Frc consts -- 0.0159 0.0017 0.0030
IR Inten -- 5.8929 0.4539 1.2669
Atom AN X Y Z X Y Z X Y Z
15 6 -0.00 0.00 -0.00 0.01 0.40 -0.02 0.07 0.02 0.41
16 1 -0.00 0.00 0.00 -0.20 0.45 -0.05 0.19 0.02 0.46
17 1 0.00 -0.00 -0.00 0.01 0.58 -0.03 -0.12 0.03 0.54
18 1 -0.00 0.00 -0.01 0.22 0.44 0.01 0.20 0.02 0.46
19 8 0.00 -0.00 0.00 0.00 0.10 -0.01 -0.00 0.01 0.12
20 1 0.79 -0.51 0.35 0.01 0.02 -0.03 -0.00 0.00 0.03

```

ZCO-P

-----  
Center Atomic Atomic Coordinates (Angstroms)

Number Number Type X Y Z

-----  
1 40 0 -0.606480 0.321108 -1.833587  
2 8 0 1.423918 1.230700 -1.639174  
3 40 0 -1.674208 0.452449 0.547600  
4 8 0 -0.090344 1.415366 1.808829  
5 40 0 -0.265823 -2.194483 -0.138276  
6 8 0 1.693793 -1.805574 0.698098  
7 40 0 1.015638 -0.307483 2.004323  
8 8 0 -0.766563 -1.272940 1.654213  
9 40 0 0.834323 2.178912 0.113152  
10 8 0 -1.025927 2.111245 -0.704808  
11 40 0 2.258783 -0.458653 -0.807560  
12 8 0 0.748862 -1.453567 -1.793476  
13 8 0 -1.851208 -1.169411 -0.893647  
14 8 0 2.355262 0.824181 0.849358  
15 6 0 -5.204669 0.153548 0.503371  
16 1 0 -5.280080 1.050154 1.132446  
17 1 0 -5.896412 0.251758 -0.347370  
18 1 0 -5.470962 -0.731488 1.101817  
19 8 0 -3.857797 0.065503 0.042398  
20 1 0 -3.653831 -0.729752 -0.507602

ZMeOH-R

-----  
Center Atomic Atomic Coordinates (Angstroms)

Number Number Type X Y Z

-----  
1 40 0 -0.606480 0.321108 -1.833587  
2 8 0 1.423918 1.230700 -1.639174  
3 40 0 -1.674208 0.452449 0.547600



4 8 0 -0.090344 1.415366 1.808829  
 5 40 0 -0.265823 -2.194483 -0.138276  
 6 8 0 1.693793 -1.805574 0.698098  
 7 40 0 1.015638 -0.307483 2.004323  
 8 8 0 -0.766563 -1.272940 1.654213  
 9 40 0 0.834323 2.178912 0.113152  
 10 8 0 -1.025927 2.111245 -0.704808  
 11 40 0 2.258783 -0.458653 -0.807560  
 12 8 0 0.748862 -1.453567 -1.793476  
 13 8 0 -1.851208 -1.169411 -0.893647  
 14 8 0 2.355262 0.824181 0.849358  
 15 6 0 -5.204669 0.153548 0.503371  
 16 1 0 -5.280080 1.050154 1.132446  
 17 1 0 -5.896412 0.251758 -0.347370  
 18 1 0 -5.470962 -0.731488 1.101817  
 19 8 0 -3.857797 0.065503 0.042398  
 20 1 0 -3.653831 -0.729752 -0.507602

ZMeOH-TS1

-----  
 Center Atomic Atomic Coordinates (Angstroms)

Number Number Type X Y Z

-----  
 1 40 0 1.334507 -0.005356 -1.429960  
 2 8 0 -0.382170 -1.363405 -1.862843  
 3 40 0 1.474987 0.011448 1.238336  
 4 8 0 -0.195984 -1.347203 1.878318  
 5 40 0 -0.267186 2.215855 -0.008471  
 6 8 0 -2.192258 1.313186 0.085201  
 7 40 0 -1.693893 0.009814 1.643470  
 8 8 0 -0.210498 1.378870 1.873442  
 9 40 0 -0.262392 -2.221207 0.011844  
 10 8 0 1.633560 -1.711628 -0.107184  
 11 40 0 -1.857211 -0.012088 -1.492004  
 12 8 0 -0.386280 1.336423 -1.877477  
 13 8 0 1.627431 1.716859 -0.139345  
 14 8 0 -2.183986 -1.320931 0.101983  
 15 6 0 3.976219 0.015817 -0.746573  
 16 1 0 3.536505 -0.942231 -1.057544  
 17 1 0 3.509009 0.970842 -1.016169  
 18 1 0 5.060399 0.043257 -0.887756  
 19 8 0 3.624643 0.057660 0.984232  
 20 1 0 4.208601 -0.584041 1.421672

\*\*\*\*\* 1 imaginary frequencies (negative Signs) \*\*\*\*\*

Diagonal vibrational polarizability:  
344.6373663 7.3308900 45.9858238  
Harmonic frequencies (cm\*\*<sup>-1</sup>), IR intensities (KM/Mole), Raman scattering  
activities (A\*\*<sup>4</sup>/AMU), depolarization ratios for plane and unpolarized  
incident light, reduced masses (AMU), force constants (mDyne/A),  
and normal coordinates:  
1 2 3  
A A A  
Frequencies -- -803.0832 29.5901 63.4767  
Red. masses -- 11.4742 3.2282 3.6800  
Frc consts -- 4.3601 0.0017 0.0087  
IR Inten -- 7504.1672 1.6603 0.2603  
Atom AN X Y Z X Y Z X Y Z  
15 6 -0.45 -0.37 0.30 0.03 0.24 0.36 -0.14 0.31 -0.22  
16 1 -0.15 -0.03 0.12 0.27 0.29 0.41 -0.15 0.28 -0.20  
17 1 -0.14 -0.14 0.08 -0.02 0.16 0.25 -0.25 0.22 -0.22  
18 1 -0.20 -0.10 0.04 -0.14 0.31 0.49 -0.10 0.43 -0.29  
19 8 0.51 0.27 -0.25 0.01 0.05 0.10 0.03 0.23 -0.04  
20 1 0.18 0.09 -0.10 0.07 0.09 0.14 0.21 0.36 0.18

ZMeOH-INT1

-----  
Center Atomic Atomic Coordinates (Angstroms)

Number Number Type X Y Z  
-----

1 40 0 0.408790 0.207584 -1.966946  
2 8 0 -1.180406 -1.337494 -1.693399  
3 40 0 1.846630 0.140982 0.213821  
4 8 0 0.870059 -1.439280 1.469048  
5 40 0 -0.402202 2.238708 0.162632  
6 8 0 -1.978349 1.124477 1.145026  
7 40 0 -0.663833 -0.216092 2.085956  
8 8 0 0.649704 1.318754 1.698931  
9 40 0 -0.043792 -2.248101 -0.211481  
10 8 0 1.541312 -1.469574 -1.219153  
11 40 0 -2.343926 -0.135269 -0.491989  
12 8 0 -1.400566 1.416337 -1.463754  
13 8 0 1.272427 1.896211 -0.938784  
14 8 0 -1.762765 -1.573482 0.920153  
15 6 0 3.576523 -1.280602 0.661848  
16 1 0 3.284696 -2.345467 0.714591  
17 1 0 4.355588 -1.153689 -0.109466  
18 1 0 4.013253 -0.975732 1.630644  
19 8 0 3.431542 1.362298 0.343910

20 1 0 3.276968 2.260001 0.017604

ZMeOH-TS2

-----  
Center Atomic Atomic Coordinates (Angstroms)

Number Number Type X Y Z  
-----

1 40 0 -1.183392 0.384246 -1.631763  
2 8 0 0.913962 1.412739 -1.684658  
3 40 0 -1.656709 0.253986 0.939606  
4 8 0 0.167853 1.212949 1.922736  
5 40 0 -0.122884 -2.301786 -0.208678  
6 8 0 1.937490 -1.756190 0.251833  
7 40 0 1.388600 -0.372890 1.692671  
8 8 0 -0.330300 -1.430289 1.674913  
9 40 0 0.727721 2.248901 0.200072  
10 8 0 -1.155800 2.045517 -0.174122  
11 40 0 1.948255 -0.227720 -1.160796  
12 8 0 0.420636 -1.282765 -1.928290  
13 8 0 -1.806587 -1.419714 -0.500387  
14 8 0 2.441017 0.947537 0.489500  
15 6 0 -3.224798 0.702206 -0.912465  
16 1 0 -3.622975 1.732464 -0.971135  
17 1 0 -3.925030 -0.075249 -1.285635  
18 1 0 -3.839501 0.131360 0.481184  
19 8 0 -3.747273 -0.256642 1.509658  
20 1 0 -4.055327 -1.176415 1.516498

\*\*\*\*\* 1 imaginary frequencies (negative Signs) \*\*\*\*\*

Diagonal vibrational polarizability:

92.6416563 34.5273259 33.8860205

Harmonic frequencies (cm<sup>-1</sup>), IR intensities (KM/Mole), Raman scattering activities (A<sup>4</sup>/AMU), depolarization ratios for plane and unpolarized incident light, reduced masses (AMU), force constants (mDyne/A), and normal coordinates:

1 2 3

A A A

Frequencies -- -1247.8540 24.1511 94.7810

Red. masses -- 1.0410 3.1824 4.0299

Frc consts -- 0.9551 0.0011 0.0213

IR Inten -- 2105.8403 0.7137 6.6216

Atom AN X Y Z X Y Z X Y Z

15 6 -0.03 -0.02 0.01 0.07 0.18 0.37 0.01 0.02 0.16

16 1 0.06 0.01 0.01 0.25 0.10 0.52 0.28 0.21 0.11

17 1 0.08 -0.04 -0.01 -0.04 0.35 0.46 -0.22 -0.14 0.15

18 1 -0.04 0.94 -0.30 -0.01 0.11 0.13 -0.01 0.06 0.37  
19 8 0.03 -0.00 -0.00 -0.04 0.01 -0.13 0.04 0.11 0.41  
20 1 0.06 -0.05 0.06 -0.12 0.14 -0.26 -0.21 -0.00 0.62

ZMeOH-INT2

-----  
Center Atomic Atomic Coordinates (Angstroms)

Number Number Type X Y Z

-----  
1 40 0 -1.082828 0.593532 -1.619783  
2 8 0 1.121002 1.355525 -1.620462  
3 40 0 -1.657521 0.468026 0.929363  
4 8 0 0.264030 1.150169 1.960496  
5 40 0 -0.401855 -2.243455 -0.304434  
6 8 0 1.695637 -1.972016 0.222989  
7 40 0 1.273331 -0.575321 1.694581  
8 8 0 -0.560890 -1.414552 1.599032  
9 40 0 1.000202 2.154747 0.286682  
10 8 0 -0.880737 2.200789 -0.145231  
11 40 0 1.940591 -0.415538 -1.135818  
12 8 0 0.307456 -1.240160 -1.971752  
13 8 0 -1.962451 -1.162264 -0.615386  
14 8 0 2.523297 0.637646 0.567564  
15 6 0 -3.059079 1.153072 -0.850824  
16 1 0 -3.303872 2.230174 -0.790082  
17 1 0 -3.921999 0.509689 -1.127837  
18 1 0 -4.052383 0.042397 0.658479  
19 8 0 -3.710848 -0.503871 1.417814  
20 1 0 -3.616063 -1.390459 1.020278

ZMeOH-INT3

-----  
Center Atomic Atomic Coordinates (Angstroms)

Number Number Type X Y Z

-----  
1 40 0 -0.790471 1.755883 -0.003237  
2 8 0 0.946620 1.537619 1.383565  
3 40 0 -1.997927 -0.561273 0.001059  
4 8 0 -0.769413 -1.819746 1.391152  
5 40 0 0.044178 -0.124948 -2.257868  
6 8 0 1.799571 -1.016235 -1.355888  
7 40 0 0.704733 -2.183624 0.003341  
8 8 0 -0.768986 -1.824786 -1.385008  
9 40 0 0.043445 -0.116585 2.258433

```

10 8 0 -1.694060 0.775043 1.692385
11 40 0 2.112356 0.554025 -0.000625
12 8 0 0.947132 1.532613 -1.388620
13 8 0 -1.693174 0.769490 -1.696019
14 8 0 1.799075 -1.011655 1.359962
15 6 0 -1.526735 3.765723 -0.006342
16 1 0 -1.614672 4.389484 -0.913923
17 1 0 -1.613874 4.392246 0.899420
18 8 0 -3.922304 -0.821140 0.000930
19 1 0 -4.876629 -0.708008 0.000196
20 6 0 4.256922 1.229077 -0.001253
21 1 0 4.484762 1.839611 0.892485
22 1 0 4.483164 1.843699 -0.892587
23 1 0 4.947924 0.365414 -0.003834

```

ZMeOH-TS3

-----  
Center Atomic Atomic Coordinates (Angstroms)

Number Number Type X Y Z  
-----

```

1 40 0 1.618161 -0.839597 -0.000751
2 8 0 0.184653 -1.845607 1.385531
3 40 0 0.951922 1.687205 0.000647
4 8 0 -0.805152 1.792775 1.388692
5 40 0 -0.262581 -0.011816 -2.257959
6 8 0 -2.161829 -0.532969 -1.357635
7 40 0 -2.138988 1.068639 0.000102
8 8 0 -0.805821 1.793556 -1.387505
9 40 0 -0.261453 -0.013171 2.258143
10 8 0 1.624512 0.495883 1.693759
11 40 0 -1.337810 -1.903872 0.000218
12 8 0 0.183887 -1.844649 -1.386505
13 8 0 1.623836 0.496177 -1.694567
14 8 0 -2.161421 -0.533339 1.358107
15 6 0 3.716866 -0.337707 -0.000957
16 1 0 4.345162 -0.327258 -0.908630
17 1 0 4.345454 -0.327659 0.906524
18 8 0 1.972288 3.327711 0.000758
19 1 0 2.608701 4.046392 0.000963
20 6 0 2.902555 -2.778932 -0.001535
21 1 0 3.995280 -2.866999 -0.001765
22 1 0 2.489439 -3.257968 -0.906953
23 1 0 2.489771 -3.258537 0.903734

```

\*\*\*\*\* 1 imaginary frequencies (negative Signs) \*\*\*\*\*

Diagonal vibrational polarizability:

73.4905217 63.6979976 37.2349265

Harmonic frequencies (cm\*\*<sup>-1</sup>), IR intensities (KM/Mole), Raman scattering activities (A\*\*<sup>4</sup>/AMU), depolarization ratios for plane and unpolarized incident light, reduced masses (AMU), force constants (mDyne/A), and normal coordinates:

1 2 3

A A A

Frequencies -- -234.9316 34.5449 90.6546

Red. masses -- 3.6767 1.2393 3.1663

Frc consts -- 0.1196 0.0009 0.0153

IR Inten -- 153.8471 0.0054 1.5456

Atom AN X Y Z X Y Z X Y Z

15 6 -0.08 0.40 0.00 -0.00 0.00 -0.02 -0.04 0.18 0.00

16 1 -0.08 0.52 -0.00 -0.03 0.02 -0.05 -0.05 0.25 -0.00

17 1 -0.08 0.52 0.00 0.03 -0.02 -0.05 -0.05 0.25 0.00

18 8 -0.05 0.02 0.00 0.00 -0.00 -0.00 0.23 -0.14 -0.00

19 1 -0.02 -0.01 0.00 0.00 -0.00 -0.00 0.52 -0.39 -0.00

20 6 -0.25 -0.12 -0.00 0.00 -0.00 0.14 0.22 0.14 -0.00

21 1 -0.23 0.12 0.00 -0.00 0.00 -0.26 0.22 0.25 0.00

22 1 -0.15 -0.22 0.01 -0.36 -0.31 0.47 0.27 0.09 -0.00

23 1 -0.15 -0.22 -0.01 0.36 0.31 0.47 0.27 0.09 -0.00

ZMeOH-INT4

-----  
Center Atomic Atomic Coordinates (Angstroms)

Number Number Type X Y Z  
-----

1 40 0 1.667643 -0.357643 0.510165

2 8 0 0.208590 -1.149923 2.004077

3 40 0 0.563414 1.787828 -0.492163

4 8 0 -1.411672 1.932550 0.558410

5 40 0 0.123866 -0.807544 -2.084243

6 8 0 -1.782695 -1.431379 -1.268545

7 40 0 -2.307085 0.489688 -0.602514

8 8 0 -0.893068 1.001378 -2.004939

9 40 0 -0.719702 0.707314 2.085981

10 8 0 1.113266 1.429733 1.583405

11 40 0 -0.991270 -2.029630 0.579692

12 8 0 0.726430 -2.079871 -0.555616

13 8 0 1.746521 0.292593 -1.545061

14 8 0 -2.290265 -0.520176 1.239042

15 6 0 3.870019 -0.531381 0.945514

16 1 0 4.346693 0.455660 0.788090

```

17 1 0 4.003498 -0.779467 2.017290
18 8 0 1.554296 3.413591 -0.882578
19 1 0 2.229636 4.087950 -0.990001
20 6 0 4.495475 -1.601254 0.039662
21 1 0 5.575319 -1.751212 0.223430
22 1 0 4.389384 -1.337470 -1.027035
23 1 0 4.016660 -2.588096 0.174875

```

ZMeOH-TS4

-----  
Center Atomic Atomic Coordinates (Angstroms)

Number Number Type X Y Z  
-----

```

1 40 0 -1.009586 -0.174051 -1.513635
2 8 0 0.462183 1.474599 -1.835665
3 40 0 -1.379241 -0.301731 1.069788
4 8 0 -0.042145 1.296470 1.896739
5 40 0 0.737311 -2.220211 -0.071755
6 8 0 2.522291 -1.030071 0.222788
7 40 0 1.669042 0.168538 1.720887
8 8 0 0.396996 -1.443718 1.824017
9 40 0 0.022705 2.237656 0.046496
10 8 0 -1.798553 1.381928 -0.244879
11 40 0 2.087764 0.317009 -1.325140
12 8 0 0.900807 -1.261691 -1.908355
13 8 0 -1.262376 -1.962609 -0.334340
14 8 0 2.092726 1.650652 0.294241
15 6 0 -4.733151 0.456259 0.244944
16 1 0 -5.639993 0.238721 0.813914
17 1 0 -4.314969 1.451327 0.402347
18 8 0 -3.492250 -0.445687 1.309866
19 1 0 -3.938406 -1.256767 1.594201
20 6 0 -4.588115 -0.117895 -1.113910
21 1 0 -4.753938 0.635506 -1.902811
22 1 0 -5.242768 -0.981993 -1.297593
23 1 0 -3.539560 -0.484408 -1.257174

```

\*\*\*\*\* 1 imaginary frequencies (negative Signs) \*\*\*\*\*

Diagonal vibrational polarizability:

429.2212605 11.2921217 86.7338438

Harmonic frequencies (cm<sup>-1</sup>), IR intensities (KM/Mole), Raman scattering activities (A<sup>4</sup>/AMU), depolarization ratios for plane and unpolarized incident light, reduced masses (AMU), force constants (mDyne/A), and normal coordinates:

1 2 3

A A A

Frequencies -- -879.3606 34.7099 43.6155

Red. masses -- 9.5906 2.3982 3.5665

Frc consts -- 4.3695 0.0017 0.0040

IR Inten -- 10531.4071 2.4085 1.2932

Atom AN X Y Z X Y Z X Y Z

15 6 -0.40 0.27 -0.33 0.07 -0.00 -0.13 0.04 0.25 0.14

16 1 -0.01 -0.20 0.06 0.01 -0.08 -0.26 0.05 0.27 0.16

17 1 -0.20 0.12 -0.02 0.00 0.01 -0.02 0.12 0.21 0.21

18 8 0.47 -0.20 0.26 -0.02 0.02 -0.04 0.00 0.09 0.04

19 1 0.19 -0.07 0.12 -0.03 0.03 -0.04 -0.06 0.13 0.06

20 6 -0.03 0.06 -0.03 0.26 0.09 -0.15 -0.04 0.35 0.09

21 1 0.14 -0.17 -0.29 0.65 0.20 -0.13 0.09 0.45 0.16

22 1 0.07 -0.02 -0.05 0.11 0.25 -0.39 -0.18 0.47 0.01

23 1 0.18 0.01 -0.11 0.21 -0.17 0.10 -0.09 0.20 0.07

ZMeOH-P

-----  
Center Atomic Atomic Coordinates (Angstroms)

Number Number Type X Y Z

-----  
1 40 0 0.951176 -0.000286 1.570610

2 8 0 -0.776869 1.386595 1.854909

3 40 0 1.447475 0.000314 -0.994360

4 8 0 -0.089804 1.387639 -1.852722

5 40 0 -0.384226 -2.258013 0.010573

6 8 0 -2.321376 -1.357865 -0.344606

7 40 0 -1.605724 -0.000848 -1.778413

8 8 0 -0.090068 -1.388534 -1.852227

9 40 0 -0.383674 2.258218 0.009937

10 8 0 1.536296 1.694020 0.370040

11 40 0 -2.173939 0.000839 1.246582

12 8 0 -0.777290 -1.385470 1.855591

13 8 0 1.535802 -1.694481 0.371233

14 8 0 -2.321059 1.358062 -0.345526

15 6 0 4.846257 -0.000240 -0.269342

16 1 0 5.458991 -0.896666 -0.455737

17 1 0 5.458741 0.896417 -0.455451

18 8 0 3.746000 -0.000254 -1.218367

19 1 0 4.085446 0.000129 -2.125408

20 6 0 4.300758 -0.000549 1.142580

21 1 0 5.135236 -0.000652 1.859596

22 1 0 3.701464 -0.909623 1.316714

23 1 0 3.701431 0.908441 1.317083



TGro.-R

-----  
Center Atomic Atomic Coordinates (Angstroms)

Number Number Type X Y Z  
-----

|    |    |   |           |           |           |
|----|----|---|-----------|-----------|-----------|
| 1  | 7  | 0 | 1.411146  | 1.376306  | 0.020386  |
| 2  | 7  | 0 | 1.361917  | -1.529487 | -0.191562 |
| 3  | 7  | 0 | -1.604509 | -1.334109 | -0.072884 |
| 4  | 7  | 0 | -1.629624 | 1.715156  | 0.450817  |
| 5  | 6  | 0 | 1.265965  | 2.737010  | 0.103448  |
| 6  | 6  | 0 | 2.578392  | 3.357271  | 0.149435  |
| 7  | 6  | 0 | 3.498585  | 2.356007  | 0.044446  |
| 8  | 6  | 0 | 2.760542  | 1.113156  | -0.065448 |
| 9  | 6  | 0 | 3.378001  | -0.140966 | -0.263790 |
| 10 | 6  | 0 | 2.699043  | -1.371122 | -0.378829 |
| 11 | 6  | 0 | 3.283222  | -2.652398 | -0.732904 |
| 12 | 6  | 0 | 2.264406  | -3.564438 | -0.726889 |
| 13 | 6  | 0 | 1.051462  | -2.845211 | -0.367658 |
| 14 | 6  | 0 | -0.237433 | -3.408330 | -0.230910 |
| 15 | 6  | 0 | -1.441034 | -2.690360 | -0.027678 |
| 16 | 6  | 0 | -2.718596 | -3.334164 | 0.263088  |
| 17 | 6  | 0 | -3.641268 | -2.337754 | 0.364952  |
| 18 | 6  | 0 | -2.925816 | -1.086446 | 0.134241  |
| 19 | 6  | 0 | -3.570390 | 0.181734  | 0.061395  |
| 20 | 6  | 0 | -2.922782 | 1.425698  | -0.005101 |
| 21 | 6  | 0 | -3.396279 | 2.612117  | -0.647030 |
| 22 | 6  | 0 | -2.381609 | 3.545011  | -0.653773 |
| 23 | 6  | 0 | -1.238539 | 2.972608  | -0.015100 |
| 24 | 6  | 0 | 0.063330  | 3.493255  | 0.033886  |
| 25 | 1  | 0 | 2.766835  | 4.421749  | 0.253129  |
| 26 | 1  | 0 | 4.580960  | 2.445071  | 0.044891  |
| 27 | 1  | 0 | 4.329080  | -2.822289 | -0.974422 |
| 28 | 1  | 0 | 2.319159  | -4.621642 | -0.971467 |
| 29 | 1  | 0 | -2.874931 | -4.400686 | 0.398258  |
| 30 | 1  | 0 | -4.698711 | -2.431166 | 0.597211  |
| 31 | 1  | 0 | -4.366556 | 2.693521  | -1.129446 |
| 32 | 1  | 0 | -2.382993 | 4.516231  | -1.141031 |
| 33 | 29 | 0 | 0.235876  | -0.185809 | 0.663624  |
| 34 | 6  | 0 | -0.327942 | -4.895373 | -0.307954 |
| 35 | 6  | 0 | 0.354362  | -5.703036 | 0.617787  |
| 36 | 6  | 0 | -1.091589 | -5.518633 | -1.309532 |
| 37 | 6  | 0 | 0.271733  | -7.094927 | 0.546921  |
| 38 | 1  | 0 | 0.942998  | -5.228298 | 1.405516  |

39 6 0 -1.170129 -6.910525 -1.383823  
40 1 0 -1.617001 -4.899114 -2.039119  
41 6 0 -0.489877 -7.703305 -0.454943  
42 1 0 0.801254 -7.707016 1.280995  
43 1 0 -1.762529 -7.378378 -2.173885  
44 1 0 -0.553172 -8.792593 -0.511642  
45 6 0 -5.049276 0.215933 -0.099751  
46 6 0 -5.693761 -0.553076 -1.086371  
47 6 0 -5.834295 1.046897 0.720451  
48 6 0 -7.079615 -0.498902 -1.240228  
49 1 0 -5.093814 -1.183110 -1.745353  
50 6 0 -7.220604 1.097935 0.568993  
51 1 0 -5.345435 1.643989 1.492994  
52 6 0 -7.848296 0.324341 -0.411731  
53 1 0 -7.561731 -1.097106 -2.017158  
54 1 0 -7.814350 1.740427 1.223615  
55 1 0 -8.933508 0.364594 -0.531837  
56 6 0 4.865211 -0.181666 -0.380590  
57 6 0 5.627826 -0.838932 0.598850  
58 6 0 5.525684 0.413779 -1.467305  
59 6 0 7.019311 -0.894166 0.495164  
60 1 0 5.115285 -1.287070 1.452527  
61 6 0 6.917087 0.355086 -1.571956  
62 1 0 4.936941 0.916671 -2.237505  
63 6 0 7.667893 -0.298435 -0.590447  
64 1 0 7.600139 -1.401460 1.269329  
65 1 0 7.416613 0.817926 -2.426557  
66 1 0 8.756593 -0.343318 -0.671803  
67 6 0 0.160558 4.966021 -0.182539  
68 6 0 -0.506524 5.849923 0.683363  
69 6 0 0.872811 5.501861 -1.270225  
70 6 0 -0.448374 7.229848 0.480337  
71 1 0 -1.065467 5.443186 1.528858  
72 6 0 0.927525 6.881260 -1.476129  
73 1 0 1.372868 4.824015 -1.964550  
74 6 0 0.270300 7.750111 -0.599701  
75 1 0 -0.963957 7.901856 1.170569  
76 1 0 1.479977 7.279679 -2.330519  
77 1 0 0.315020 8.829826 -0.760689  
78 6 0 -0.986403 1.042725 1.491758  
79 1 0 -0.341875 1.685017 2.096939  
80 1 0 -1.630080 0.370789 2.057359  
81 6 0 3.168564 -0.031164 3.202835  
82 1 0 3.586010 0.868653 2.747756

83 1 0 3.767938 -0.571184 3.939476  
84 1 0 2.143389 -0.345846 2.975227  
85 8 0 0.132024 -1.008101 2.390198  
86 1 0 0.477657 -1.892269 2.200247

TGro.-TS1

-----  
Center Atomic Atomic Coordinates (Angstroms)

Number Number Type X Y Z  
-----

1 7 0 0.094478 2.048137 0.002267  
2 7 0 2.001928 -0.174961 -0.361073  
3 7 0 -0.276571 -2.033401 -0.008382  
4 7 0 -2.309055 0.194438 0.424046  
5 6 0 -0.908662 2.958320 0.165515  
6 6 0 -0.340709 4.289312 0.319522  
7 6 0 1.011270 4.153110 0.201244  
8 6 0 1.276941 2.739754 -0.029889  
9 6 0 2.565048 2.213735 -0.291695  
10 6 0 2.881749 0.851040 -0.488429  
11 6 0 4.203296 0.311322 -0.793311  
12 6 0 4.082253 -1.048522 -0.784470  
13 6 0 2.685312 -1.342637 -0.476275  
14 6 0 2.131896 -2.627314 -0.276233  
15 6 0 0.768322 -2.921435 -0.026912  
16 6 0 0.260051 -4.265550 0.209862  
17 6 0 -1.096705 -4.163874 0.318937  
18 6 0 -1.423804 -2.756028 0.154230  
19 6 0 -2.746463 -2.243699 0.066185  
20 6 0 -3.080505 -0.880250 -0.036631  
21 6 0 -4.206676 -0.316925 -0.706298  
22 6 0 -4.078430 1.056825 -0.700147  
23 6 0 -2.866906 1.399337 -0.029079  
24 6 0 -2.298440 2.682397 0.080674  
25 1 0 -0.902551 5.199790 0.509056  
26 1 0 1.764333 4.933317 0.267211  
27 1 0 5.097322 0.898069 -0.987080  
28 1 0 4.858281 -1.785864 -0.972095  
29 1 0 0.864523 -5.165087 0.285907  
30 1 0 -1.808706 -4.962619 0.508351  
31 1 0 -4.970996 -0.904130 -1.208357  
32 1 0 -4.721631 1.779705 -1.194898  
33 29 0 0.133498 0.019078 0.317934  
34 6 0 3.087824 -3.774912 -0.302242

35 6 0 4.081719 -3.885196 0.684696  
36 6 0 3.020813 -4.755121 -1.305399  
37 6 0 4.983588 -4.951211 0.669832  
38 1 0 4.133200 -3.128967 1.471329  
39 6 0 3.925024 -5.819404 -1.322123  
40 1 0 2.256425 -4.670749 -2.080807  
41 6 0 4.908482 -5.921198 -0.333992  
42 1 0 5.746617 -5.026161 1.448465  
43 1 0 3.863784 -6.570438 -2.113551  
44 1 0 5.615217 -6.754411 -0.346627  
45 6 0 -3.875852 -3.198853 -0.099107  
46 6 0 -3.848423 -4.203081 -1.084425  
47 6 0 -5.019419 -3.090835 0.713294  
48 6 0 -4.924214 -5.078024 -1.241676  
49 1 0 -2.980210 -4.280086 -1.741175  
50 6 0 -6.093952 -3.967655 0.558157  
51 1 0 -5.052700 -2.315112 1.481188  
52 6 0 -6.049376 -4.965989 -0.419297  
53 1 0 -4.887654 -5.846389 -2.017717  
54 1 0 -6.968491 -3.873868 1.206474  
55 1 0 -6.890576 -5.652183 -0.542712  
56 6 0 3.706627 3.176250 -0.329420  
57 6 0 4.703530 3.120838 0.659011  
58 6 0 3.811081 4.142154 -1.342923  
59 6 0 5.777709 4.012773 0.633967  
60 1 0 4.618244 2.376345 1.454122  
61 6 0 4.887659 5.031595 -1.369326  
62 1 0 3.043009 4.184956 -2.118177  
63 6 0 5.873725 4.969896 -0.380490  
64 1 0 6.541716 3.962237 1.413651  
65 1 0 4.958561 5.773666 -2.168388  
66 1 0 6.715317 5.666523 -0.400523  
67 6 0 -3.245541 3.820501 -0.075937  
68 6 0 -4.379066 3.916824 0.751466  
69 6 0 -3.055108 4.801072 -1.066717  
70 6 0 -5.284906 4.968388 0.605477  
71 1 0 -4.537370 3.161092 1.523680  
72 6 0 -3.962854 5.850681 -1.215208  
73 1 0 -2.195096 4.722752 -1.734050  
74 6 0 -5.078983 5.940285 -0.377924  
75 1 0 -6.153435 5.031721 1.265451  
76 1 0 -3.802374 6.598493 -1.995578  
77 1 0 -5.788263 6.763156 -0.494246  
78 6 0 -1.511558 0.108493 1.626550

```

79 1 0 -1.541785 1.064501 2.147285
80 1 0 -1.889771 -0.735840 2.203973
81 6 0 3.477936 -0.043516 2.786534
82 1 0 3.884677 0.090853 3.790843
83 1 0 4.147502 -0.310614 1.968020
84 1 0 2.406938 0.074622 2.602815
85 8 0 0.182945 -0.209445 2.349628
86 1 0 0.253661 -1.178500 2.355596

```

\*\*\*\*\* 1 imaginary frequencies (negative Signs) \*\*\*\*\*

Diagonal vibrational polarizability:

25.6414801 35.2980561 77.9903941

Harmonic frequencies (cm<sup>-1</sup>), IR intensities (KM/Mole), Raman scattering activities (A<sup>4</sup>/AMU), depolarization ratios for plane and unpolarized incident light, reduced masses (AMU), force constants (mDyne/A), and normal coordinates:

1 2 3

A A A

Frequencies -- -324.1964 14.2630 25.7485

Red. masses -- 7.4943 6.0646 5.5471

Frc consts -- 0.4641 0.0007 0.0022

IR Inten -- 49.9674 0.0065 0.5122

Atom AN X Y Z X Y Z X Y Z

```

1 7 -0.01 -0.01 -0.02 0.00 -0.01 0.00 0.00 -0.01 0.06
2 7 -0.03 0.00 0.00 -0.00 -0.01 -0.00 0.01 -0.01 0.09
3 7 -0.01 0.00 -0.04 -0.00 -0.01 -0.01 0.01 -0.00 0.08
4 7 -0.12 0.03 -0.07 0.00 -0.00 -0.00 -0.00 -0.00 0.05
5 6 -0.01 -0.02 -0.01 0.01 -0.00 0.03 0.00 -0.00 0.05
6 6 -0.01 -0.01 0.00 0.01 -0.00 0.02 0.00 -0.00 0.03
7 6 -0.01 -0.01 -0.00 0.01 -0.01 -0.01 0.00 -0.00 0.03
8 6 -0.01 -0.00 -0.01 0.00 -0.01 -0.02 0.00 -0.00 0.05
9 6 -0.01 0.00 0.00 -0.00 -0.01 -0.04 0.00 -0.00 0.05
10 6 -0.02 0.00 0.00 -0.00 -0.01 -0.03 0.01 -0.01 0.07
11 6 -0.02 0.00 0.00 -0.00 -0.02 -0.02 0.00 -0.01 0.06
12 6 -0.02 0.00 0.00 -0.00 -0.02 0.01 0.00 -0.01 0.07
13 6 -0.02 0.00 0.00 -0.00 -0.01 0.02 0.01 -0.01 0.08
14 6 -0.01 -0.00 -0.00 -0.00 -0.01 0.04 0.00 -0.01 0.06
15 6 -0.01 0.00 -0.01 -0.00 -0.01 0.02 0.00 -0.01 0.06
16 6 -0.01 0.01 0.00 -0.01 -0.01 0.01 -0.00 -0.01 0.04
17 6 -0.01 0.01 0.00 -0.01 -0.00 -0.02 -0.00 -0.00 0.04
18 6 -0.01 0.02 -0.02 -0.01 -0.00 -0.03 0.00 -0.00 0.06
19 6 -0.02 0.01 -0.02 -0.00 0.00 -0.05 0.00 -0.00 0.04
20 6 -0.06 0.00 -0.06 0.00 0.01 -0.02 0.00 -0.00 0.04
21 6 -0.06 0.00 -0.05 0.00 0.02 -0.02 0.01 -0.00 0.02
22 6 -0.07 0.01 -0.05 0.00 0.02 0.02 0.01 -0.00 0.02

```

23 6 -0.07 0.02 -0.06 0.00 0.01 0.02 0.00 -0.00 0.04  
24 6 -0.02 -0.00 -0.02 0.00 0.00 0.04 0.00 -0.00 0.03  
25 1 -0.01 -0.02 0.00 0.02 -0.00 0.04 0.00 0.00 0.01  
26 1 -0.01 -0.01 0.01 0.01 -0.01 -0.03 0.00 0.00 0.01  
27 1 -0.03 0.00 0.00 -0.00 -0.02 -0.03 0.00 -0.01 0.05  
28 1 -0.03 -0.00 0.00 -0.00 -0.02 0.03 0.00 -0.01 0.06  
29 1 -0.01 0.01 0.02 -0.02 -0.01 0.02 -0.00 -0.01 0.04  
30 1 -0.01 0.02 0.01 -0.02 -0.00 -0.04 -0.01 -0.00 0.03  
31 1 -0.07 0.01 -0.04 0.00 0.03 -0.03 0.02 -0.00 0.01  
32 1 -0.08 0.00 -0.04 0.00 0.03 0.03 0.02 -0.00 0.01  
33 29 -0.01 -0.01 0.13 -0.00 -0.00 -0.00 0.00 -0.00 0.08  
34 6 -0.00 0.00 0.00 0.01 -0.00 0.08 -0.01 -0.02 -0.01  
35 6 -0.00 0.00 0.00 -0.01 0.03 0.11 0.03 -0.07 -0.05  
36 6 -0.00 0.00 0.00 0.03 -0.03 0.11 -0.06 0.02 -0.05  
37 6 -0.00 0.00 0.00 -0.01 0.03 0.16 0.01 -0.08 -0.13  
38 1 -0.00 0.00 0.00 -0.03 0.05 0.09 0.07 -0.10 -0.03  
39 6 -0.00 0.00 0.00 0.04 -0.03 0.16 -0.08 0.01 -0.13  
40 1 -0.00 -0.00 0.00 0.05 -0.06 0.09 -0.09 0.06 -0.01  
41 6 -0.00 0.00 0.00 0.02 0.00 0.18 -0.04 -0.04 -0.17  
42 1 -0.00 0.00 0.00 -0.02 0.06 0.18 0.04 -0.12 -0.17  
43 1 -0.00 0.00 0.00 0.06 -0.05 0.18 -0.12 0.04 -0.15  
44 1 -0.00 0.00 0.00 0.02 0.01 0.22 -0.05 -0.05 -0.23  
45 6 -0.00 -0.00 -0.01 -0.00 0.01 -0.08 0.01 -0.00 -0.02  
46 6 -0.00 -0.00 -0.00 0.02 0.02 -0.10 0.05 0.03 -0.05  
47 6 -0.00 -0.00 -0.00 -0.02 -0.01 -0.11 -0.01 -0.03 -0.05  
48 6 -0.00 -0.00 -0.00 0.02 0.03 -0.14 0.05 0.03 -0.11  
49 1 -0.00 -0.00 -0.00 0.04 0.03 -0.08 0.07 0.05 -0.02  
50 6 -0.00 -0.00 0.00 -0.02 -0.00 -0.15 -0.01 -0.03 -0.11  
51 1 -0.00 0.00 -0.00 -0.04 -0.02 -0.10 -0.04 -0.05 -0.03  
52 6 -0.00 -0.00 0.00 0.01 0.01 -0.17 0.03 0.00 -0.14  
53 1 -0.00 -0.00 0.00 0.04 0.04 -0.15 0.08 0.05 -0.13  
54 1 0.00 -0.00 0.00 -0.03 -0.01 -0.17 -0.03 -0.05 -0.14  
55 1 -0.00 -0.00 0.00 0.01 0.02 -0.20 0.03 0.01 -0.19  
56 6 -0.00 0.00 0.00 -0.01 -0.01 -0.08 -0.01 0.00 -0.01  
57 6 -0.00 -0.00 0.00 0.02 0.02 -0.10 0.02 0.05 -0.04  
58 6 -0.00 -0.00 0.00 -0.03 -0.03 -0.10 -0.04 -0.03 -0.05  
59 6 -0.00 -0.00 0.00 0.01 0.02 -0.15 0.02 0.05 -0.11  
60 1 -0.00 -0.00 0.00 0.04 0.03 -0.09 0.05 0.08 -0.01  
61 6 -0.00 -0.00 0.00 -0.04 -0.02 -0.15 -0.05 -0.03 -0.12  
62 1 -0.00 0.00 0.00 -0.05 -0.04 -0.09 -0.07 -0.07 -0.03  
63 6 -0.00 -0.00 0.00 -0.02 0.00 -0.17 -0.02 0.02 -0.15  
64 1 -0.00 -0.00 0.00 0.03 0.04 -0.16 0.04 0.09 -0.13  
65 1 -0.00 -0.00 -0.00 -0.06 -0.04 -0.16 -0.08 -0.06 -0.15  
66 1 -0.00 -0.00 0.00 -0.02 0.01 -0.20 -0.03 0.02 -0.20

67 6 -0.00 0.01 -0.01 0.00 0.01 0.09 0.01 -0.00 -0.01  
 68 6 -0.00 0.00 -0.00 0.02 -0.01 0.11 -0.00 0.02 -0.03  
 69 6 -0.00 0.01 -0.00 -0.02 0.03 0.10 0.03 -0.03 -0.03  
 70 6 -0.00 0.00 0.00 0.02 -0.01 0.16 0.00 0.02 -0.08  
 71 1 0.00 0.00 -0.00 0.04 -0.03 0.10 -0.02 0.05 -0.01  
 72 6 -0.00 0.01 -0.00 -0.02 0.03 0.15 0.03 -0.03 -0.08  
 73 1 -0.00 0.01 -0.01 -0.03 0.04 0.08 0.04 -0.05 -0.02  
 74 6 -0.00 0.00 0.00 -0.00 0.01 0.17 0.02 -0.01 -0.10  
 75 1 -0.00 0.00 0.00 0.03 -0.02 0.18 -0.01 0.04 -0.09  
 76 1 -0.01 0.01 -0.00 -0.04 0.05 0.16 0.05 -0.06 -0.10  
 77 1 -0.00 0.00 0.00 -0.01 0.02 0.21 0.02 -0.01 -0.14  
 78 6 0.02 0.02 -0.32 -0.00 -0.02 -0.00 -0.02 0.00 0.06  
 79 1 0.23 -0.06 -0.18 -0.01 -0.03 0.01 -0.03 0.00 0.06  
 80 1 0.41 -0.11 -0.28 0.00 -0.03 -0.02 -0.02 0.00 0.06  
 81 6 0.02 0.00 0.00 -0.00 0.03 -0.01 -0.03 0.19 0.07  
 82 1 0.04 0.02 -0.00 -0.00 0.05 -0.01 -0.00 0.34 0.04  
 83 1 0.04 0.01 0.01 0.00 0.05 -0.01 -0.04 0.09 0.09  
 84 1 0.00 -0.11 0.03 -0.00 0.01 -0.01 -0.04 0.13 0.09  
 85 8 0.48 -0.03 0.08 -0.00 -0.02 -0.00 -0.03 0.01 0.08  
 86 1 0.43 -0.03 0.13 0.00 -0.02 -0.01 -0.02 0.01 0.09

TGro.-INT1

-----  
 Center Atomic Atomic Coordinates (Angstroms)

Number Number Type X Y Z

-----

|    |   |   |           |           |           |
|----|---|---|-----------|-----------|-----------|
| 1  | 7 | 0 | -1.331934 | -1.456400 | -0.118974 |
| 2  | 7 | 0 | -1.516941 | 1.491060  | -0.424192 |
| 3  | 7 | 0 | 1.412144  | 1.495666  | 0.032027  |
| 4  | 7 | 0 | 1.665624  | -1.498750 | 0.474748  |
| 5  | 6 | 0 | -1.104722 | -2.792632 | 0.097309  |
| 6  | 6 | 0 | -2.370480 | -3.479709 | 0.280243  |
| 7  | 6 | 0 | -3.351246 | -2.541304 | 0.143692  |
| 8  | 6 | 0 | -2.692937 | -1.273784 | -0.126409 |
| 9  | 6 | 0 | -3.407541 | -0.064162 | -0.322043 |
| 10 | 6 | 0 | -2.849948 | 1.224805  | -0.425111 |
| 11 | 6 | 0 | -3.589085 | 2.485063  | -0.451975 |
| 12 | 6 | 0 | -2.660808 | 3.484217  | -0.405951 |
| 13 | 6 | 0 | -1.352362 | 2.835521  | -0.350223 |
| 14 | 6 | 0 | -0.110968 | 3.482016  | -0.173860 |
| 15 | 6 | 0 | 1.141135  | 2.850407  | 0.015886  |
| 16 | 6 | 0 | 2.375553  | 3.586609  | 0.213450  |
| 17 | 6 | 0 | 3.384113  | 2.670018  | 0.296964  |
| 18 | 6 | 0 | 2.779722  | 1.360667  | 0.160835  |

19 6 0 3.512856 0.150627 0.099407  
20 6 0 2.945301 -1.134166 0.009120  
21 6 0 3.488756 -2.243966 -0.697939  
22 6 0 2.549388 -3.255100 -0.707325  
23 6 0 1.395229 -2.797982 -0.010168  
24 6 0 0.151473 -3.449634 0.055056  
25 1 0 -2.486739 -4.532651 0.522302  
26 1 0 -4.424613 -2.686616 0.227548  
27 1 0 -4.670663 2.585087 -0.488882  
28 1 0 -2.838241 4.556474 -0.389337  
29 1 0 2.457486 4.668241 0.274441  
30 1 0 4.440139 2.861125 0.466982  
31 1 0 4.441376 -2.225824 -1.221071  
32 1 0 2.602859 -4.199209 -1.243117  
33 29 0 -0.074525 0.104571 -0.253562  
34 6 0 -0.128439 4.978813 -0.148328  
35 6 0 -0.644675 5.670173 0.958574  
36 6 0 0.364777 5.717656 -1.234960  
37 6 0 -0.667006 7.066867 0.979131  
38 1 0 -1.027113 5.101331 1.808975  
39 6 0 0.343492 7.114180 -1.215447  
40 1 0 0.764317 5.185333 -2.101040  
41 6 0 -0.172742 7.793035 -0.107980  
42 1 0 -1.069584 7.589971 1.850054  
43 1 0 0.728619 7.674523 -2.070970  
44 1 0 -0.189995 8.885432 -0.092342  
45 6 0 4.990449 0.215780 -0.074420  
46 6 0 5.577277 0.992247 -1.090235  
47 6 0 5.832722 -0.542558 0.758336  
48 6 0 6.962634 1.019425 -1.257110  
49 1 0 4.933795 1.562816 -1.762227  
50 6 0 7.218401 -0.512487 0.594512  
51 1 0 5.387790 -1.151971 1.547804  
52 6 0 7.788537 0.270443 -0.413393  
53 1 0 7.399588 1.622308 -2.056854  
54 1 0 7.856226 -1.100499 1.258851  
55 1 0 8.873020 0.293551 -0.544137  
56 6 0 -4.900063 -0.158006 -0.323559  
57 6 0 -5.647127 0.329965 0.760465  
58 6 0 -5.578818 -0.740938 -1.404947  
59 6 0 -7.040966 0.239378 0.760658  
60 1 0 -5.118781 0.768068 1.609614  
61 6 0 -6.972786 -0.829999 -1.405678  
62 1 0 -5.002385 -1.122437 -2.250667



```

63 6 0 -7.708094 -0.339636 -0.322715
64 1 0 -7.608379 0.618797 1.614105
65 1 0 -7.486967 -1.282364 -2.257279
66 1 0 -8.798510 -0.410083 -0.322478
67 6 0 0.184031 -4.928418 -0.102340
68 6 0 1.021023 -5.708238 0.716756
69 6 0 -0.581825 -5.579335 -1.087416
70 6 0 1.079383 -7.094579 0.568534
71 1 0 1.620158 -5.214317 1.484543
72 6 0 -0.520591 -6.965183 -1.238320
73 1 0 -1.214245 -4.984355 -1.748399
74 6 0 0.307178 -7.728419 -0.409187
75 1 0 1.727347 -7.683357 1.222294
76 1 0 -1.116436 -7.451677 -2.014372
77 1 0 0.352869 -8.813636 -0.527388
78 6 0 1.342129 -1.228166 1.918387
79 1 0 0.778812 -2.099792 2.274210
80 1 0 2.316392 -1.185359 2.437862
81 6 0 -2.745928 -0.191823 3.055108
82 1 0 -3.386199 -1.042848 2.821015
83 1 0 -3.080988 0.550165 3.782198
84 1 0 -1.765937 -0.101570 2.584820
85 8 0 0.571370 -0.113469 2.190253
86 1 0 0.974587 0.673388 1.776650

```

TGro.-TS2

-----  
Center Atomic Atomic Coordinates (Angstroms)

Number Number Type X Y Z

-----  
1 7 0 -1.201053 -1.536701 -0.364553  
2 7 0 -1.664020 1.288666 -0.195410  
3 7 0 1.172592 1.744776 -0.210700  
4 7 0 1.635860 -1.079310 -0.293267  
5 6 0 -0.787757 -2.846479 -0.271299  
6 6 0 -1.937877 -3.717938 -0.182088  
7 6 0 -3.043931 -2.921958 -0.245364  
8 6 0 -2.574916 -1.557474 -0.352984  
9 6 0 -3.424789 -0.441868 -0.378536  
10 6 0 -2.971969 0.882745 -0.320944  
11 6 0 -3.839841 2.039744 -0.368160  
12 6 0 -3.042412 3.139008 -0.245939  
13 6 0 -1.680939 2.661253 -0.133308  
14 6 0 -0.564629 3.500280 -0.005521

15 6 0 0.761230 3.043095 -0.020869  
16 6 0 1.913137 3.902087 0.149650  
17 6 0 3.017759 3.111228 0.036235  
18 6 0 2.548023 1.762513 -0.194344  
19 6 0 3.398814 0.658069 -0.350683  
20 6 0 2.947607 -0.665274 -0.437287  
21 6 0 3.799001 -1.812480 -0.630227  
22 6 0 2.999841 -2.920103 -0.572082  
23 6 0 1.650926 -2.458100 -0.367696  
24 6 0 0.536688 -3.300660 -0.272366  
25 1 0 -1.893757 -4.797914 -0.075039  
26 1 0 -4.087180 -3.220506 -0.197790  
27 1 0 -4.918449 2.005974 -0.491775  
28 1 0 -3.338115 4.184193 -0.250872  
29 1 0 1.872313 4.969614 0.345378  
30 1 0 4.060815 3.401710 0.122313  
31 1 0 4.872139 -1.770968 -0.793119  
32 1 0 3.289022 -3.962071 -0.677169  
33 29 0 -0.025533 0.111615 -0.278047  
34 6 0 -0.804754 4.966804 0.139523  
35 6 0 -1.443008 5.475791 1.282220  
36 6 0 -0.402479 5.863546 -0.863612  
37 6 0 -1.671078 6.846679 1.419686  
38 1 0 -1.753862 4.785214 2.069081  
39 6 0 -0.632198 7.234288 -0.727707  
40 1 0 0.087289 5.474728 -1.758935  
41 6 0 -1.266623 7.730118 0.414867  
42 1 0 -2.163540 7.226795 2.318010  
43 1 0 -0.317928 7.917796 -1.520224  
44 1 0 -1.445664 8.802626 0.521813  
45 6 0 4.870431 0.902095 -0.394447  
46 6 0 5.448725 1.616860 -1.455691  
47 6 0 5.702326 0.423703 0.631133  
48 6 0 6.826010 1.845112 -1.492682  
49 1 0 4.807943 1.988170 -2.258368  
50 6 0 7.079076 0.654202 0.595672  
51 1 0 5.256128 -0.123343 1.464477  
52 6 0 7.645044 1.364628 -0.466955  
53 1 0 7.261806 2.397920 -2.328445  
54 1 0 7.712014 0.281245 1.404521  
55 1 0 8.722419 1.544222 -0.495180  
56 6 0 -4.896731 -0.685185 -0.428584  
57 6 0 -5.715213 -0.346633 0.661238  
58 6 0 -5.487897 -1.266702 -1.561700

```

59 6 0 -7.091090 -0.581627 0.618012
60 1 0 -5.259791 0.094822 1.550246
61 6 0 -6.864124 -1.500007 -1.606211
62 1 0 -4.857588 -1.530285 -2.413786
63 6 0 -7.669804 -1.158048 -0.516376
64 1 0 -7.713290 -0.317881 1.476682
65 1 0 -7.309585 -1.948045 -2.497751
66 1 0 -8.746354 -1.341473 -0.550531
67 6 0 0.789670 -4.766003 -0.145297
68 6 0 1.355881 -5.264415 1.039551
69 6 0 0.475787 -5.658046 -1.181604
70 6 0 1.602690 -6.631647 1.181308
71 1 0 1.577720 -4.562909 1.848240
72 6 0 0.726702 -7.024986 -1.038767
73 1 0 0.039484 -5.271285 -2.105348
74 6 0 1.290612 -7.514611 0.142959
75 1 0 2.037342 -7.010196 2.109738
76 1 0 0.483757 -7.709783 -1.854957
77 1 0 1.485777 -8.583964 0.254588
78 6 0 0.823542 -1.906177 3.025269
79 1 0 0.776112 -1.855077 4.126202
80 1 0 -0.247373 -2.295344 2.591097
81 6 0 -1.428543 -1.593441 2.977556
82 1 0 -2.081418 -2.230718 2.366017
83 1 0 -1.674758 -1.650704 4.043521
84 1 0 -1.381594 -0.565318 2.601830
85 8 0 1.338102 -0.766867 2.557709
86 1 0 1.478657 -0.855077 1.591444
***** 1 imaginary frequencies (negative Signs) *****
Diagonal vibrational polarizability:
29.7103966 27.7549862 45.9427634
Harmonic frequencies (cm**-1), IR intensities (KM/Mole), Raman scattering
activities (A**4/AMU), depolarization ratios for plane and unpolarized
incident light, reduced masses (AMU), force constants (mDyne/A),
and normal coordinates:
1 2 3
A A A
Frequencies -- -1267.0519 9.1127 22.4692
Red. masses -- 1.1220 6.0903 4.4095
Frc consts -- 1.0613 0.0003 0.0013
IR Inten -- 133.6966 0.0048 0.0801
Atom AN X Y Z X Y Z X Y Z
1 7 -0.00 -0.00 -0.00 -0.00 0.00 0.00 -0.01 0.00 0.04
2 7 -0.00 0.00 -0.00 -0.00 0.00 -0.00 -0.01 0.01 0.01

```

3 7 0.00 0.00 -0.00 -0.00 0.01 -0.00 -0.01 0.00 0.03  
4 7 0.00 -0.00 -0.00 -0.00 0.01 -0.01 -0.01 0.00 -0.00  
5 6 -0.00 0.00 0.00 0.00 0.00 -0.02 -0.01 0.01 0.06  
6 6 -0.00 -0.00 0.00 0.00 -0.00 -0.01 -0.01 0.01 0.10  
7 6 0.00 -0.00 0.00 0.00 -0.00 0.02 -0.01 0.01 0.11  
8 6 0.00 0.00 0.00 -0.00 0.00 0.03 -0.01 0.01 0.06  
9 6 0.00 -0.00 -0.00 -0.00 -0.00 0.05 -0.01 0.01 0.02  
10 6 0.00 0.00 0.00 -0.01 0.00 0.02 -0.01 0.01 -0.02  
11 6 -0.00 0.00 0.00 -0.01 -0.00 0.01 -0.00 0.01 -0.07  
12 6 -0.00 -0.00 -0.00 -0.01 0.00 -0.03 -0.00 0.01 -0.07  
13 6 -0.00 -0.00 -0.00 -0.01 0.01 -0.03 -0.01 0.01 -0.02  
14 6 0.00 -0.00 -0.00 -0.01 0.01 -0.05 -0.01 0.00 0.01  
15 6 0.00 -0.00 -0.00 -0.01 0.01 -0.03 -0.01 -0.00 0.04  
16 6 0.00 0.00 -0.00 -0.01 0.01 -0.02 -0.01 -0.01 0.08  
17 6 0.00 0.00 0.00 -0.01 0.01 0.02 -0.01 -0.01 0.07  
18 6 -0.00 -0.00 0.00 -0.00 0.01 0.03 -0.01 -0.00 0.04  
19 6 0.00 -0.00 -0.00 -0.00 0.01 0.04 -0.01 0.00 0.00  
20 6 -0.00 0.00 -0.00 0.00 0.01 0.02 -0.02 0.00 -0.03  
21 6 0.00 0.00 0.00 0.00 0.01 0.01 -0.02 0.01 -0.07  
22 6 0.00 -0.00 0.00 0.00 0.01 -0.03 -0.02 0.01 -0.07  
23 6 0.00 0.00 -0.00 0.00 0.01 -0.03 -0.02 0.00 -0.02  
24 6 -0.00 0.00 -0.00 0.00 0.00 -0.05 -0.01 0.00 0.02  
25 1 -0.00 -0.00 0.00 0.01 -0.00 -0.03 -0.01 0.01 0.13  
26 1 0.00 0.00 0.00 0.00 -0.00 0.04 -0.01 0.01 0.13  
27 1 -0.00 -0.00 0.00 -0.01 -0.01 0.03 0.00 0.01 -0.11  
28 1 -0.00 -0.00 0.00 -0.01 0.00 -0.05 0.00 0.01 -0.10  
29 1 -0.00 -0.00 0.00 -0.01 0.02 -0.04 -0.01 -0.01 0.10  
30 1 -0.00 0.00 0.00 -0.01 0.01 0.04 -0.01 -0.01 0.09  
31 1 0.00 0.00 -0.00 0.01 0.02 0.03 -0.03 0.01 -0.10  
32 1 0.00 0.00 -0.00 0.00 0.01 -0.05 -0.03 0.01 -0.09  
33 29 -0.00 0.00 0.00 -0.00 0.01 -0.00 -0.01 0.00 0.02  
34 6 -0.00 0.00 0.00 -0.01 0.01 -0.09 -0.01 0.01 -0.00  
35 6 -0.00 -0.00 0.00 -0.01 0.05 -0.11 -0.07 0.01 -0.04  
36 6 0.00 -0.00 -0.00 0.00 -0.02 -0.11 0.05 0.00 0.02  
37 6 0.00 -0.00 -0.00 -0.01 0.05 -0.15 -0.07 0.01 -0.05  
38 1 0.00 -0.00 0.00 -0.02 0.07 -0.09 -0.12 0.01 -0.05  
39 6 -0.00 -0.00 -0.00 0.01 -0.01 -0.16 0.05 0.00 0.01  
40 1 0.00 0.00 -0.00 0.01 -0.04 -0.10 0.10 0.00 0.05  
41 6 0.00 -0.00 -0.00 0.00 0.02 -0.17 -0.01 0.01 -0.03  
42 1 0.00 -0.00 0.00 -0.01 0.08 -0.16 -0.12 0.01 -0.08  
43 1 0.00 -0.00 -0.00 0.01 -0.03 -0.17 0.10 0.00 0.03  
44 1 0.00 -0.00 -0.00 0.00 0.03 -0.20 -0.01 0.01 -0.04  
45 6 0.00 -0.00 -0.00 0.00 0.00 0.09 -0.01 -0.00 -0.00  
46 6 -0.00 0.00 -0.00 0.04 0.00 0.11 -0.02 0.05 0.02

47 6 -0.00 -0.00 0.00 -0.03 -0.01 0.11 -0.00 -0.05 -0.04  
48 6 -0.00 -0.00 -0.00 0.04 -0.00 0.15 -0.02 0.04 0.02  
49 1 0.00 0.00 0.00 0.07 0.01 0.09 -0.03 0.09 0.05  
50 6 -0.00 -0.00 -0.00 -0.03 -0.01 0.16 -0.00 -0.06 -0.04  
51 1 -0.00 0.00 0.00 -0.06 -0.01 0.09 0.01 -0.09 -0.06  
52 6 -0.00 -0.00 -0.00 0.01 -0.01 0.18 -0.01 -0.01 -0.01  
53 1 -0.00 0.00 0.00 0.07 -0.00 0.17 -0.03 0.08 0.04  
54 1 -0.00 0.00 0.00 -0.06 -0.02 0.17 0.01 -0.10 -0.07  
55 1 -0.00 0.00 0.00 0.01 -0.02 0.21 -0.01 -0.01 -0.02  
56 6 -0.00 -0.00 -0.00 -0.01 -0.00 0.09 -0.01 0.01 -0.02  
57 6 0.00 0.00 0.00 0.02 0.00 0.11 -0.05 0.09 -0.08  
58 6 0.00 -0.00 -0.00 -0.04 -0.00 0.10 0.03 -0.07 0.00  
59 6 0.00 0.00 -0.00 0.02 0.00 0.15 -0.05 0.10 -0.12  
60 1 0.00 -0.00 0.00 0.05 0.01 0.09 -0.09 0.15 -0.09  
61 6 -0.00 -0.00 -0.00 -0.04 -0.00 0.14 0.03 -0.07 -0.04  
62 1 -0.00 -0.00 -0.00 -0.06 -0.01 0.09 0.06 -0.14 0.05  
63 6 0.00 0.00 -0.00 -0.01 0.00 0.16 -0.01 0.02 -0.10  
64 1 0.00 -0.00 0.00 0.05 0.01 0.16 -0.09 0.16 -0.16  
65 1 -0.00 -0.00 -0.00 -0.06 -0.01 0.16 0.07 -0.13 -0.03  
66 1 0.00 -0.00 -0.00 -0.01 0.00 0.19 -0.01 0.02 -0.13  
67 6 -0.00 0.00 -0.00 0.00 0.00 -0.08 -0.01 0.00 0.01  
68 6 -0.00 -0.00 -0.00 0.01 -0.03 -0.10 0.08 0.00 -0.03  
69 6 0.00 -0.00 0.00 -0.01 0.03 -0.10 -0.09 0.00 0.03  
70 6 0.00 -0.00 0.00 0.01 -0.03 -0.13 0.08 0.00 -0.05  
71 1 0.01 -0.01 0.00 0.02 -0.05 -0.08 0.14 0.01 -0.05  
72 6 0.00 0.00 0.00 -0.01 0.02 -0.13 -0.08 0.00 0.02  
73 1 0.00 0.00 0.00 -0.01 0.05 -0.09 -0.15 -0.00 0.06  
74 6 0.00 0.00 0.00 0.00 -0.01 -0.15 0.00 0.00 -0.02  
75 1 0.00 -0.00 0.00 0.02 -0.05 -0.14 0.15 0.01 -0.08  
76 1 0.00 0.00 0.00 -0.01 0.04 -0.15 -0.14 -0.00 0.04  
77 1 0.00 0.00 0.00 0.00 -0.01 -0.18 0.01 0.00 -0.03  
78 6 -0.09 0.03 0.01 0.03 -0.07 -0.02 0.17 -0.05 0.00  
79 1 0.04 -0.17 -0.01 0.05 -0.09 -0.02 0.21 -0.08 0.01  
80 1 0.78 -0.47 -0.30 0.03 -0.06 -0.01 0.16 -0.07 0.03  
81 6 -0.00 0.03 0.03 0.03 -0.07 0.02 0.16 -0.10 0.09  
82 1 0.16 -0.08 -0.03 0.02 -0.06 0.01 0.15 -0.08 0.08  
83 1 -0.05 0.02 0.02 0.05 -0.09 0.02 0.19 -0.14 0.09  
84 1 -0.00 0.02 -0.00 0.03 -0.06 0.03 0.13 -0.08 0.13  
85 8 0.01 -0.00 -0.01 0.02 -0.05 0.00 0.12 -0.03 0.01  
86 1 -0.02 0.02 -0.01 0.01 -0.03 -0.00 0.07 -0.01 -0.00

TGro.-P

-----  
Center Atomic Atomic Coordinates (Angstroms)

Number Number Type X Y Z

-----  
1 7 0 0.450530 2.025625 -0.233837  
2 7 0 2.089731 -0.333033 -0.213382  
3 7 0 -0.262586 -1.967565 -0.371766  
4 7 0 -1.898316 0.391838 -0.376752  
5 6 0 -0.493756 3.025432 -0.194681  
6 6 0 0.150334 4.297630 0.048344  
7 6 0 1.489060 4.053982 0.138465  
8 6 0 1.671689 2.631733 -0.052668  
9 6 0 2.921543 1.995448 -0.057002  
10 6 0 3.090401 0.608787 -0.179210  
11 6 0 4.378375 -0.041171 -0.292486  
12 6 0 4.140255 -1.380990 -0.377796  
13 6 0 2.705575 -1.558589 -0.309665  
14 6 0 2.068062 -2.807388 -0.318878  
15 6 0 0.674746 -2.969750 -0.296258  
16 6 0 0.013824 -4.249533 -0.153559  
17 6 0 -1.327689 -4.004759 -0.143508  
18 6 0 -1.494921 -2.576769 -0.297774  
19 6 0 -2.737918 -1.937460 -0.361870  
20 6 0 -2.896619 -0.551190 -0.488014  
21 6 0 -4.165495 0.101456 -0.699530  
22 6 0 -3.925348 1.445868 -0.709995  
23 6 0 -2.509576 1.623737 -0.486255  
24 6 0 -1.877980 2.868289 -0.356904  
25 1 0 -0.365301 5.247758 0.153919  
26 1 0 2.286625 4.765506 0.331711  
27 1 0 5.335618 0.471390 -0.320815  
28 1 0 4.864166 -2.182977 -0.489513  
29 1 0 0.520295 -5.204974 -0.051365  
30 1 0 -2.139383 -4.718190 -0.033827  
31 1 0 -5.113233 -0.412596 -0.832731  
32 1 0 -4.638794 2.251230 -0.858725  
33 29 0 0.099597 0.027193 -0.307777  
34 6 0 2.916544 -4.035416 -0.331784  
35 6 0 3.758138 -4.339911 0.750711  
36 6 0 2.884282 -4.913788 -1.427307  
37 6 0 4.547246 -5.491937 0.738002  
38 1 0 3.782452 -3.667150 1.610580  
39 6 0 3.674723 -6.064889 -1.441651  
40 1 0 2.235957 -4.681916 -2.274994  
41 6 0 4.508580 -6.357676 -0.358746  
42 1 0 5.191820 -5.716889 1.591198

43 1 0 3.641751 -6.734365 -2.304622  
44 1 0 5.126329 -7.258803 -0.369136  
45 6 0 -3.974247 -2.757265 -0.204408  
46 6 0 -4.403386 -3.655147 -1.192361  
47 6 0 -4.722290 -2.626042 0.978215  
48 6 0 -5.565927 -4.407626 -1.005561  
49 1 0 -3.823844 -3.754650 -2.112984  
50 6 0 -5.881606 -3.382011 1.163043  
51 1 0 -4.366613 -1.934759 1.747015  
52 6 0 -6.306869 -4.272569 0.172077  
53 1 0 -5.895909 -5.099673 -1.784249  
54 1 0 -6.454052 -3.277723 2.088033  
55 1 0 -7.215431 -4.862019 0.317598  
56 6 0 4.144317 2.843014 0.067451  
57 6 0 4.976463 2.736692 1.193817  
58 6 0 4.487127 3.760600 -0.939020  
59 6 0 6.120847 3.528277 1.311785  
60 1 0 4.713418 2.029905 1.983701  
61 6 0 5.632556 4.550929 -0.822761  
62 1 0 3.849226 3.844240 -1.821467  
63 6 0 6.452686 4.437615 0.303453  
64 1 0 6.754094 3.437116 2.197622  
65 1 0 5.887881 5.255644 -1.617879  
66 1 0 7.348429 5.056497 0.395043  
67 6 0 -2.730214 4.093455 -0.373223  
68 6 0 -3.667643 4.324065 0.647111  
69 6 0 -2.609807 5.038253 -1.405196  
70 6 0 -4.463859 5.471151 0.635929  
71 1 0 -3.761309 3.597410 1.457076  
72 6 0 -3.407762 6.184268 -1.417953  
73 1 0 -1.887291 4.862616 -2.205080  
74 6 0 -4.336802 6.404344 -0.397046  
75 1 0 -5.183959 5.638626 1.440508  
76 1 0 -3.306044 6.906709 -2.231438  
77 1 0 -4.960477 7.301411 -0.406328  
78 6 0 -1.229577 -1.039996 2.996271  
79 1 0 -1.421582 -1.539906 3.959814  
80 1 0 -0.953246 -1.831612 2.274425  
81 8 0 -2.443772 -0.412638 2.626297  
82 1 0 -2.305185 -0.006321 1.757609  
83 6 0 -0.078098 -0.053160 3.143031  
84 1 0 0.139586 0.450205 2.186166  
85 1 0 0.845077 -0.564413 3.460731  
86 1 0 -0.324630 0.727166 3.879908

CO--Zr<sub>6</sub>O<sub>8</sub> (TCPP-Cu)<sub>6</sub>

-----  
Center Atomic Atomic Coordinates (Angstroms)

Number Number Type X Y Z

-----  
1 8 0 2.898920 2.633727 -0.964588  
2 6 0 4.644338 4.746561 -1.024762  
3 1 0 4.715858 4.070924 -1.690628  
4 6 0 5.492056 5.816240 -1.037992  
5 1 0 6.149081 5.891902 -1.717699  
6 6 0 7.310252 8.028274 0.926033  
7 6 0 7.503079 7.009486 1.928193  
8 1 0 7.004060 6.206421 2.022062  
9 6 0 13.692099 15.412250 -0.363849  
10 1 0 14.609714 15.304088 -0.590257  
11 6 0 12.854237 14.334761 -0.359509  
12 1 0 13.188521 13.473577 -0.574039  
13 6 0 9.638350 13.230266 -1.062712  
14 6 0 9.524239 14.186680 -2.135881  
15 1 0 10.066392 14.955565 -2.268659  
16 8 0 -3.732450 1.194853 -0.965264  
17 6 0 -6.434916 1.650009 -1.025907  
18 1 0 -5.885448 2.049731 -1.691703  
19 6 0 -7.785142 1.849314 -1.039370  
20 1 0 -8.179068 2.380449 -1.719169  
21 6 0 -10.610242 2.318000 0.924165  
22 6 0 -9.824524 2.994438 1.926421  
23 1 0 -8.879555 2.963812 2.020447  
24 6 0 -20.195663 4.152789 -0.367391  
25 1 0 -20.560762 5.001536 -0.593903  
26 6 0 -18.843600 3.965923 -0.362819  
27 1 0 -18.264899 4.686004 -0.577290  
28 6 0 -16.279020 1.733096 -1.065486  
29 6 0 -17.050066 1.156012 -2.138752  
30 1 0 -17.986995 1.241080 -2.271690  
31 8 0 0.829337 -3.828644 -0.964933  
32 6 0 1.786404 -6.396630 -1.025288  
33 1 0 1.165610 -6.120672 -1.691200  
34 6 0 2.288915 -7.665613 -1.038604  
35 1 0 2.026015 -8.272366 -1.718415  
36 6 0 3.295247 -10.346465 0.925233  
37 6 0 2.316410 -10.004182 1.927310  
38 1 0 1.870433 -9.170498 2.021221



39 6 0 6.499197 -19.565144 -0.365328  
40 1 0 5.946748 -20.305714 -0.591892  
41 6 0 5.984996 -18.300790 -0.360904  
42 1 0 5.072073 -18.159671 -0.575533  
43 6 0 6.636507 -14.963421 -1.063632  
44 6 0 7.521977 -15.342677 -2.136734  
45 1 0 7.916792 -16.196623 -2.269563  
46 6 0 14.571340 2.863901 5.012819  
47 1 0 14.970558 3.725935 4.962821  
48 6 0 14.468071 2.089002 3.893945  
49 1 0 14.802935 2.406097 3.065256  
50 6 0 12.481169 -0.189836 2.186476  
51 6 0 11.288404 0.433007 2.704950  
52 1 0 11.234155 1.016994 3.452454  
53 6 0 12.594514 -5.001911 -6.401070  
54 1 0 12.379665 -4.615476 -7.243379  
55 6 0 12.699620 -4.214572 -5.291086  
56 1 0 12.549530 -3.280452 -5.356667  
57 6 0 14.426001 -3.699876 -2.322750  
58 6 0 15.633439 -4.223365 -2.912234  
59 1 0 15.695728 -4.752910 -3.698649  
60 6 0 -10.630429 -8.406816 -6.403401  
61 1 0 -10.188235 -8.413871 -7.245655  
62 6 0 -10.001268 -8.891641 -5.293395  
63 1 0 -9.117242 -9.228712 -5.358904  
64 6 0 -10.419094 -10.644428 -2.325317  
65 6 0 -11.476093 -11.428286 -2.915027  
66 1 0 -11.965737 -11.217365 -3.701479  
67 6 0 -4.808292 -14.053047 5.010560  
68 1 0 -4.261352 -14.829790 4.960540  
69 6 0 -5.427598 -13.576031 3.891664  
70 1 0 -5.320313 -14.024483 3.062935  
71 6 0 -6.407463 -10.715705 2.184407  
72 6 0 -5.271748 -9.994221 2.703110  
73 1 0 -4.738969 -10.239322 3.450651  
74 6 0 -1.966692 13.409027 -6.402074  
75 1 0 -2.193792 13.029701 -7.244401  
76 6 0 -2.701285 13.106439 -5.292196  
77 1 0 -3.435201 12.509393 -5.357868  
78 6 0 -4.010704 14.344331 -2.324138  
79 6 0 -4.160971 15.651717 -2.913713  
80 1 0 -3.733387 15.970393 -3.700074  
81 6 0 -9.768982 11.188681 5.010641  
82 1 0 -10.715126 11.103395 4.960491

83 6 0 -9.046080 11.486640 3.891871  
84 1 0 -9.487988 11.618051 3.063102  
85 6 0 -6.078816 10.905265 2.184921  
86 6 0 -6.021917 9.560905 2.703473  
87 1 0 -6.500664 9.221968 3.450914  
88 6 0 12.581189 7.889607 5.012738  
89 1 0 13.462349 7.534594 4.962759  
90 6 0 11.975409 8.383691 3.893843  
91 1 0 12.436591 8.381799 3.065159  
92 6 0 8.967032 8.684371 2.186333  
93 6 0 8.524050 7.413798 2.704838  
94 1 0 8.884315 6.951015 3.452358  
95 6 0 5.755248 12.269203 -6.401349  
96 1 0 5.863221 11.840418 -7.243645  
97 6 0 6.370883 11.767309 -5.291345  
98 1 0 6.901012 10.983680 -5.356898  
99 6 0 7.981569 12.574171 -2.323013  
100 6 0 8.503268 13.782368 -2.912525  
101 1 0 8.186136 14.210972 -3.698955  
102 6 0 -13.126295 6.952306 5.010221  
103 1 0 -13.259418 7.892918 4.960172  
104 6 0 -13.251110 6.180587 3.891344  
105 1 0 -13.479925 6.580886 3.062602  
106 6 0 -12.007037 3.424830 2.184179  
107 6 0 -10.685281 3.676509 2.702889  
108 1 0 -10.464757 4.219937 3.450418  
109 6 0 -13.504283 -1.149509 -6.403519  
110 1 0 -13.186792 -0.841650 -7.245777  
111 6 0 -13.377632 -0.365350 -5.293533  
112 1 0 -12.964042 0.485567 -5.359061  
113 6 0 -14.882226 0.626265 -2.325499  
114 6 0 -16.189309 0.473941 -2.915220  
115 1 0 -16.401793 -0.015044 -3.701660  
116 6 0 0.539173 -14.842377 5.011062  
117 1 0 -0.208851 -15.427973 4.960920  
118 6 0 1.270094 -14.564667 3.892292  
119 1 0 1.037969 -14.963019 3.063532  
120 6 0 3.034894 -12.109476 2.185293  
121 6 0 2.155971 -11.090615 2.703807  
122 1 0 1.574962 -11.171312 3.451244  
123 6 0 7.746427 -11.119396 -6.401677  
124 1 0 7.321208 -10.998412 -7.244012  
125 6 0 7.003817 -11.401736 -5.291800  
126 1 0 6.060118 -11.469018 -5.357480

127 6 0 6.896860 -13.200410 -2.323693  
128 6 0 7.682416 -14.256243 -2.913230  
129 1 0 8.212262 -14.195808 -3.699586  
130 8 0 3.915761 0.065913 -0.964546  
131 6 0 6.634489 -0.279146 -1.024681  
132 1 0 6.224066 0.262265 -1.690566  
133 6 0 7.984718 -0.478450 -1.037891  
134 1 0 8.515426 -0.083799 -1.717602  
135 6 0 10.824388 -0.845932 0.926176  
136 6 0 10.267433 0.028696 1.928306  
137 1 0 9.353899 0.272400 2.022158  
138 6 0 16.082782 -3.043780 -1.062449  
139 6 0 16.654409 -3.819054 -2.135590  
140 1 0 17.575984 -4.008316 -2.268353  
141 6 0 -11.877659 -16.852564 -0.367052  
142 1 0 -11.562696 -17.721172 -0.593535  
143 6 0 -11.020088 -15.790696 -0.362499  
144 1 0 -10.105287 -15.919365 -0.576957  
145 6 0 -10.679447 -12.407439 -1.065257  
146 6 0 -11.636532 -12.514719 -2.138531  
147 1 0 -12.261208 -13.218180 -2.271456  
148 8 0 -1.902876 -3.425347 -0.965189  
149 6 0 -3.561062 -5.607299 -1.025789  
150 1 0 -2.886890 -5.522489 -1.691580  
151 6 0 -4.408778 -6.676977 -1.039232  
152 1 0 -4.332267 -7.333830 -1.719012  
153 6 0 -6.147109 -8.952694 0.924347  
154 6 0 -5.111308 -8.907788 1.926613  
155 1 0 -4.443499 -8.238507 2.020628  
156 6 0 -8.658072 18.711324 -0.365946  
157 1 0 -9.567762 18.872888 -0.592526  
158 6 0 -8.167253 17.437711 -0.361482  
159 1 0 -8.736057 16.709830 -0.576096  
160 6 0 -5.407499 15.451161 -1.064124  
161 6 0 -5.021728 16.333788 -2.137246  
162 1 0 -5.318587 17.226518 -2.270103  
163 8 0 -2.017076 3.359370 -0.965049  
164 6 0 -3.077602 5.886384 -1.025486  
165 1 0 -3.341156 5.260208 -1.691384  
166 6 0 -3.580111 7.155368 -1.038844  
167 1 0 -4.187132 7.417615 -1.718669  
168 6 0 -4.682021 9.798435 0.924908  
169 6 0 -5.161160 8.878835 1.927005  
170 1 0 -4.915462 7.965843 2.020943

171 6 0 -12.584163 -7.889691 -5.093803  
172 1 0 -13.465325 -7.534679 -5.043824  
173 6 0 -11.978383 -8.383776 -3.974908  
174 1 0 -12.439565 -8.381883 -3.146224  
175 6 0 -8.970006 -8.684455 -2.267398  
176 6 0 -8.527024 -7.413882 -2.785902  
177 1 0 -8.887290 -6.951099 -3.533422  
178 6 0 -5.758222 -12.269287 6.320284  
179 1 0 -5.866195 -11.840502 7.162580  
180 6 0 -6.373857 -11.767394 5.210280  
181 1 0 -6.903987 -10.983764 5.275833  
182 6 0 -7.984543 -12.574255 2.241948  
183 6 0 -8.506242 -13.782453 2.831460  
184 1 0 -8.189110 -14.211056 3.617890  
185 6 0 13.123321 -6.952390 -5.091285  
186 1 0 13.256444 -7.893002 -5.041237  
187 6 0 13.248136 -6.180671 -3.972409  
188 1 0 13.476951 -6.580970 -3.143667  
189 6 0 12.004062 -3.424915 -2.265244  
190 6 0 10.682307 -3.676593 -2.783954  
191 1 0 10.461783 -4.220021 -3.531482  
192 6 0 13.501309 1.149425 6.322454  
193 1 0 13.183818 0.841566 7.164713  
194 6 0 13.374657 0.365266 5.212468  
195 1 0 12.961068 -0.485651 5.277996  
196 6 0 14.879252 -0.626349 2.244435  
197 6 0 16.186334 -0.474025 2.834155  
198 1 0 16.398819 0.014960 3.620595  
199 6 0 -0.542148 14.842293 -5.092127  
200 1 0 0.205876 15.427889 -5.041985  
201 6 0 -1.273068 14.564583 -3.973357  
202 1 0 -1.040943 14.962935 -3.144597  
203 6 0 -3.037868 12.109392 -2.266358  
204 6 0 -2.158945 11.090531 -2.784871  
205 1 0 -1.577937 11.171227 -3.532309  
206 6 0 -7.749402 11.119311 6.320612  
207 1 0 -7.324183 10.998328 7.162947  
208 6 0 -7.006791 11.401651 5.210735  
209 1 0 -6.063093 11.468934 5.276415  
210 6 0 -6.899835 13.200325 2.242628  
211 6 0 -7.685391 14.256159 2.832165  
212 1 0 -8.215237 14.195724 3.618521  
213 8 0 -3.918735 -0.065997 0.883481  
214 6 0 -6.637463 0.279061 0.943616

215 1 0 -6.227040 -0.262349 1.609502  
216 6 0 -7.987692 0.478366 0.956826  
217 1 0 -8.518400 0.083715 1.636538  
218 6 0 -10.827362 0.845848 -1.007241  
219 6 0 -10.270407 -0.028780 -2.009371  
220 1 0 -9.356873 -0.272484 -2.103223  
221 6 0 -20.534339 1.858781 0.282505  
222 1 0 -21.129131 1.151722 0.508926  
223 6 0 -19.185948 1.647036 0.278186  
224 1 0 -18.840013 0.790471 0.492744  
225 6 0 -16.085757 3.043696 0.981384  
226 6 0 -16.657383 3.818970 2.054525  
227 1 0 -17.578958 4.008232 2.187288  
228 6 0 11.874685 16.852480 0.285987  
229 1 0 11.559722 17.721088 0.512470  
230 6 0 11.017114 15.790611 0.281435  
231 1 0 10.102313 15.919280 0.495892  
232 6 0 10.676473 12.407355 0.984192  
233 6 0 11.633557 12.514635 2.057466  
234 1 0 12.258234 13.218095 2.190391  
235 8 0 1.899902 3.425263 0.884125  
236 6 0 3.558087 5.607214 0.944725  
237 1 0 2.883916 5.522405 1.610515  
238 6 0 4.405802 6.676893 0.958168  
239 1 0 4.329293 7.333746 1.637947  
240 6 0 6.144135 8.952610 -1.005412  
241 6 0 5.108334 8.907704 -2.007678  
242 1 0 4.440524 8.238423 -2.101693  
243 6 0 8.655098 -18.711408 0.284882  
244 1 0 9.564787 -18.872973 0.511461  
245 6 0 8.164278 -17.437795 0.280417  
246 1 0 8.733083 -16.709914 0.495032  
247 6 0 5.404524 -15.451246 0.983059  
248 6 0 5.018754 -16.333872 2.056181  
249 1 0 5.315613 -17.226602 2.189038  
250 8 0 2.014102 -3.359453 0.883983  
251 6 0 3.074628 -5.886468 0.944421  
252 1 0 3.338182 -5.260292 1.610319  
253 6 0 3.577137 -7.155452 0.957779  
254 1 0 4.184157 -7.417699 1.637604  
255 6 0 4.679047 -9.798519 -1.005972  
256 6 0 5.158186 -8.878919 -2.008070  
257 1 0 4.912488 -7.965927 -2.102008  
258 8 0 -2.901894 -2.633811 0.883524

259 6 0 -4.647312 -4.746645 0.943697  
260 1 0 -4.718832 -4.071008 1.609563  
261 6 0 -5.495030 -5.816324 0.956928  
262 1 0 -6.152055 -5.891986 1.636634  
263 6 0 -7.313226 -8.028358 -1.007098  
264 6 0 -7.506053 -7.009570 -2.009258  
265 1 0 -7.007034 -6.206505 -2.103127  
266 6 0 -13.695073 -15.412334 0.282785  
267 1 0 -14.612688 -15.304172 0.509192  
268 6 0 -12.857211 -14.334845 0.278444  
269 1 0 -13.191496 -13.473661 0.492975  
270 6 0 -9.641324 -13.230351 0.981648  
271 6 0 -9.527213 -14.186764 2.054816  
272 1 0 -10.069366 -14.955649 2.187595  
273 8 0 3.729475 -1.194936 0.884199  
274 6 0 6.431941 -1.650093 0.944842  
275 1 0 5.882473 -2.049816 1.610638  
276 6 0 7.782167 -1.849399 0.958305  
277 1 0 8.176094 -2.380533 1.638104  
278 6 0 10.607268 -2.318084 -1.005230  
279 6 0 9.821550 -2.994522 -2.007486  
280 1 0 8.876581 -2.963897 -2.101512  
281 6 0 16.306146 -1.529368 0.816580  
282 6 0 17.047092 -1.156096 2.057687  
283 1 0 17.984020 -1.241164 2.190625  
284 8 0 -0.832312 3.828559 0.883867  
285 6 0 -1.789378 6.396546 0.944223  
286 1 0 -1.168584 6.120587 1.610135  
287 6 0 -2.291890 7.665529 0.957539  
288 1 0 -2.028989 8.272282 1.637350  
289 6 0 -3.298221 10.346381 -1.006298  
290 6 0 -2.319385 10.004098 -2.008375  
291 1 0 -1.873408 9.170413 -2.102285  
292 6 0 -6.502171 19.565059 0.284263  
293 1 0 -5.949722 20.305630 0.510828  
294 6 0 -5.987970 18.300706 0.279839  
295 1 0 -5.075047 18.159587 0.494468  
296 6 0 -6.639482 14.963336 0.982568  
297 6 0 -7.524951 15.342593 2.055669  
298 1 0 -7.919766 16.196539 2.188498  
299 6 0 -14.574314 -2.863985 -5.093884  
300 1 0 -14.973532 -3.726019 -5.043886  
301 6 0 -14.471046 -2.089086 -3.975010  
302 1 0 -14.805909 -2.406181 -3.146321

303 6 0 -12.484144 0.189752 -2.267541  
304 6 0 -11.291378 -0.433091 -2.786015  
305 1 0 -11.237129 -1.017079 -3.533518  
306 6 0 -12.597488 5.001827 6.320005  
307 1 0 -12.382639 4.615392 7.162314  
308 6 0 -12.702594 4.214488 5.210022  
309 1 0 -12.552504 3.280368 5.275602  
310 6 0 -14.428975 3.699792 2.241685  
311 6 0 -15.636413 4.223281 2.831169  
312 1 0 -15.698702 4.752826 3.617584  
313 6 0 10.627455 8.406732 6.322337  
314 1 0 10.185260 8.413786 7.164590  
315 6 0 9.998292 8.891557 5.212330  
316 1 0 9.114267 9.228628 5.277839  
317 6 0 10.416119 10.644344 2.244252  
318 6 0 11.473118 11.428202 2.833963  
319 1 0 11.962763 11.217280 3.620414  
320 6 0 4.805318 14.052963 -5.091625  
321 1 0 4.258377 14.829706 -5.041604  
322 6 0 5.424624 13.575947 -3.972728  
323 1 0 5.317339 14.024399 -3.144000  
324 6 0 6.404489 10.715620 -2.265472  
325 6 0 5.268774 9.994137 -2.784175  
326 1 0 4.735995 10.239238 -3.531716  
327 6 0 1.963718 -13.409111 6.321009  
328 1 0 2.190817 -13.029786 7.163336  
329 6 0 2.698309 -13.106523 5.211131  
330 1 0 3.432225 -12.509477 5.276803  
331 6 0 4.007730 -14.344415 2.243073  
332 6 0 4.157997 -15.651801 2.832649  
333 1 0 3.730412 -15.970477 3.619009  
334 6 0 9.766008 -11.188766 -5.091706  
335 1 0 10.712152 -11.103479 -5.041556  
336 6 0 9.043106 -11.486725 -3.972936  
337 1 0 9.485014 -11.618136 -3.144167  
338 6 0 6.075842 -10.905349 -2.265986  
339 6 0 6.018943 -9.560989 -2.784538  
340 1 0 6.497690 -9.222052 -3.531979  
341 40 0 1.893392 0.750297 -1.451838  
342 8 0 1.878293 0.744354 0.829909  
343 40 0 -1.598507 1.265731 -1.452165  
344 8 0 -1.586186 1.255739 0.829582  
345 40 0 -0.298936 -2.016059 -1.452112  
346 8 0 -0.296821 -2.000279 0.829635

347 40 0 -1.896366 -0.750385 1.370777  
348 8 0 -1.881266 -0.744439 -0.910972  
349 40 0 0.295969 2.015974 1.371047  
350 8 0 0.293848 2.000194 -0.910699  
351 40 0 1.595533 -1.265811 1.371095  
352 8 0 1.583212 -1.255825 -0.910647  
353 29 0 8.442303 10.654626 -0.039475  
354 29 0 -13.450595 1.985160 -0.041794  
355 29 0 5.003831 -12.639912 -0.040328  
356 29 0 13.447621 -1.985244 -0.039271  
357 29 0 -8.445277 -10.654710 -0.041590  
358 29 0 -5.006805 12.639828 -0.040737  
359 8 0 -0.001276 0.000006 -2.214429  
360 8 0 -0.001708 -0.000088 2.133371  
361 7 0 8.209314 9.039650 1.107546  
362 7 0 8.685146 12.261793 -1.195386  
363 7 0 -11.935680 2.590933 1.105446  
364 7 0 -14.963674 1.391826 -1.197925  
365 7 0 3.721570 -11.630785 1.106649  
366 7 0 6.274403 -13.653669 -1.196198  
367 7 0 12.172123 -0.967583 1.107708  
368 7 0 14.724956 -2.990467 -1.195140  
369 7 0 -9.954346 -11.258168 -1.197721  
370 7 0 -6.926351 -10.059062 1.105650  
371 7 0 -4.774735 14.248585 -1.196649  
372 7 0 -5.250567 11.026442 1.106283  
373 7 0 -8.212289 -9.039734 -1.188611  
374 7 0 -8.688120 -12.261877 1.114321  
375 7 0 11.932706 -2.591017 -1.186511  
376 7 0 14.960700 -1.391910 1.116860  
377 7 0 -3.724544 11.630701 -1.187714  
378 7 0 -6.277378 13.653585 1.115133  
379 7 0 -12.175097 0.967498 -1.188773  
380 7 0 -14.727931 2.990381 1.114075  
381 7 0 9.951372 11.258084 1.116656  
382 7 0 6.923377 10.058978 -1.186715  
383 7 0 4.771761 -14.248669 1.115584  
384 7 0 5.247593 -11.026526 -1.187348  
385 6 0 2.763715 3.489187 -0.040186  
386 6 0 3.687763 4.655183 -0.040070  
387 6 0 5.393122 6.807064 -0.039857  
388 6 0 6.311108 7.965411 -0.039742  
389 6 0 13.196841 16.654070 -0.038879  
390 6 0 11.491482 14.502188 -0.039093



391 6 0 10.573496 13.343841 -0.039208  
392 6 0 -4.405849 0.650079 -0.040946  
393 6 0 -5.877655 0.867330 -0.041084  
394 6 0 -8.593919 1.268273 -0.041339  
395 6 0 -10.056070 1.484100 -0.041476  
396 6 0 -21.023535 3.102990 -0.042505  
397 6 0 -18.307272 2.702047 -0.042250  
398 6 0 -16.845120 2.486221 -0.042113  
399 6 0 1.637673 -4.139392 -0.040465  
400 6 0 2.185431 -5.522639 -0.040443  
401 6 0 3.196335 -8.075463 -0.040402  
402 6 0 3.740501 -9.449637 -0.040380  
403 6 0 7.822233 -19.757187 -0.040213  
404 6 0 6.811328 -17.204361 -0.040254  
405 6 0 6.267163 -15.830188 -0.040276  
406 6 0 14.092393 2.386856 6.211168  
407 6 0 13.861126 0.818670 3.969260  
408 6 0 13.736637 -0.025476 2.762451  
409 6 0 12.802849 -6.357344 -6.289709  
410 6 0 13.034116 -4.789159 -4.047801  
411 6 0 13.158605 -3.945012 -2.840992  
412 6 0 -11.908450 -7.909536 -6.292144  
413 6 0 -10.666278 -8.894176 -4.050194  
414 6 0 -9.997623 -9.424203 -2.843363  
415 6 0 -4.982103 -13.399885 6.208964  
416 6 0 -6.224275 -12.415245 3.967014  
417 6 0 -6.892929 -11.885218 2.760183  
418 6 0 -0.897039 14.267173 -6.290580  
419 6 0 -2.371131 13.683477 -4.048885  
420 6 0 -3.164628 13.369275 -2.842192  
421 6 0 -9.116573 11.012484 6.209106  
422 6 0 -7.642481 11.596180 3.967411  
423 6 0 -6.848984 11.910381 2.760718  
424 6 0 11.905475 7.909452 6.211079  
425 6 0 10.663304 8.894092 3.969129  
426 6 0 9.994649 9.424119 2.762298  
427 6 0 4.979129 13.399800 -6.290029  
428 6 0 6.221301 12.415161 -4.048079  
429 6 0 6.889955 11.885134 -2.841248  
430 6 0 -12.805823 6.357260 6.208644  
431 6 0 -13.037090 4.789075 3.966736  
432 6 0 -13.161580 3.944928 2.759927  
433 6 0 -14.095368 -2.386940 -6.292233  
434 6 0 -13.864100 -0.818754 -4.050324

435 6 0 -13.739611 0.025392 -2.843516  
436 6 0 0.894065 -14.267257 6.209515  
437 6 0 2.368157 -13.683561 3.967820  
438 6 0 3.161653 -13.369360 2.761127  
439 6 0 9.113599 -11.012569 -6.290171  
440 6 0 7.639507 -11.596265 -4.048476  
441 6 0 6.846010 -11.910465 -2.841783  
442 6 0 4.402875 -0.650163 -0.040119  
443 6 0 5.874681 -0.867414 -0.039981  
444 6 0 8.590944 -1.268358 -0.039726  
445 6 0 10.053096 -1.484184 -0.039589  
446 6 0 16.842146 -2.486305 -0.038952  
447 6 0 -13.199816 -16.654154 -0.042185  
448 6 0 -11.494456 -14.502273 -0.041972  
449 6 0 -10.576470 -13.343926 -0.041857  
450 6 0 -2.766690 -3.489271 -0.040879  
451 6 0 -3.690737 -4.655267 -0.040994  
452 6 0 -5.396096 -6.807148 -0.041208  
453 6 0 -6.314083 -7.965495 -0.041323  
454 6 0 -7.825207 19.757103 -0.040852  
455 6 0 -6.814302 17.204277 -0.040811  
456 6 0 -6.270137 15.830103 -0.040788  
457 6 0 -1.640647 4.139308 -0.040599  
458 6 0 -2.188405 5.522555 -0.040622  
459 6 0 -3.199309 8.075379 -0.040663  
460 6 0 -3.743475 9.449553 -0.040685  
461 1 0 -8.219157 20.751940 -0.040868  
462 1 0 -0.397014 14.458788 -7.076493  
463 1 0 -9.691028 10.785017 7.082697  
464 1 0 12.335715 7.568412 6.987601  
465 1 0 13.787510 17.399397 -0.038805  
466 1 0 4.555936 13.727691 -7.076028  
467 1 0 14.172495 2.930013 6.987676  
468 6 0 18.365639 -2.711185 -0.038809  
469 6 0 19.211805 -1.755718 -0.602330  
470 6 0 18.899601 -3.869984 0.524766  
471 6 0 20.591564 -1.959404 -0.602835  
472 1 0 18.847318 -0.965797 -0.987225  
473 6 0 20.279826 -4.073423 0.525223  
474 1 0 18.322771 -4.521494 0.909181  
475 6 0 21.125819 -3.118451 -0.038569  
476 1 0 21.168547 -1.308204 -0.987545  
477 1 0 20.643776 -4.863663 0.909971  
478 1 0 22.066951 -3.257167 -0.038969

479 1 0 12.722747 -6.900502 -7.066217  
 480 1 0 9.624166 -10.810399 -7.066605  
 481 1 0 8.172370 -20.641384 -0.040199  
 482 1 0 0.383498 -14.469425 6.985949  
 483 1 0 -4.551864 -13.740924 6.985486  
 484 1 0 -13.790485 -17.399481 -0.042259  
 485 1 0 -12.338689 -7.568497 -7.068666  
 486 1 0 -14.175469 -2.930097 -7.068741  
 487 1 0 -21.964342 3.241860 -0.042593  
 488 1 0 -12.725721 6.900418 6.985153  
 489 6 0 0.219773 -0.174083 7.997802  
 490 8 0 -0.043789 0.032394 6.906092

Zr<sub>6</sub>O<sub>8</sub>(TCPP-Cu)<sub>6</sub>--CO

-----  
 Center Atomic Atomic Coordinates (Angstroms)

Number Number Type X Y Z

-----

|    |   |   |            |           |           |
|----|---|---|------------|-----------|-----------|
| 1  | 8 | 0 | -3.991330  | 0.133489  | 0.926592  |
| 2  | 6 | 0 | -6.689345  | 0.614941  | 0.982209  |
| 3  | 1 | 0 | -6.307805  | 0.053560  | 1.648734  |
| 4  | 6 | 0 | -8.027851  | 0.881949  | 0.993177  |
| 5  | 1 | 0 | -8.578886  | 0.514509  | 1.671968  |
| 6  | 6 | 0 | -10.842135 | 1.391883  | -0.975604 |
| 7  | 6 | 0 | -10.328228 | 0.490331  | -1.976874 |
| 8  | 1 | 0 | -9.427961  | 0.200958  | -2.069219 |
| 9  | 6 | 0 | -20.487976 | 2.892076  | 0.297994  |
| 10 | 1 | 0 | -21.117977 | 2.215848  | 0.523361  |
| 11 | 6 | 0 | -19.151944 | 2.612737  | 0.295912  |
| 12 | 1 | 0 | -18.849918 | 1.739847  | 0.510976  |
| 13 | 6 | 0 | -15.986571 | 3.851597  | 1.004410  |
| 14 | 6 | 0 | -16.520251 | 4.654658  | 2.076659  |
| 15 | 1 | 0 | -17.431353 | 4.890062  | 2.207896  |
| 16 | 8 | 0 | 1.995635   | 3.327476  | 0.937256  |
| 17 | 6 | 0 | 3.761431   | 5.423209  | 1.000812  |
| 18 | 1 | 0 | 3.082732   | 5.372436  | 1.665467  |
| 19 | 6 | 0 | 4.661885   | 6.448866  | 1.015761  |
| 20 | 1 | 0 | 4.617393   | 7.108737  | 1.695467  |
| 21 | 6 | 0 | 6.515834   | 8.634208  | -0.944718 |
| 22 | 6 | 0 | 5.480764   | 8.641490  | -1.948719 |
| 23 | 1 | 0 | 4.780275   | 8.006668  | -2.043906 |
| 24 | 6 | 0 | 12.634545  | 16.235654 | 0.356922  |
| 25 | 1 | 0 | 12.363317  | 17.119013 | 0.582952  |
| 26 | 6 | 0 | 11.724626  | 15.218292 | 0.350847  |

27 1 0 10.817103 15.392839 0.563785  
28 6 0 11.212964 11.856468 1.052751  
29 6 0 12.172437 11.915444 2.127632  
30 1 0 12.831503 12.586573 2.261661  
31 8 0 1.768222 -3.454389 0.936739  
32 6 0 2.700118 -6.031577 0.998738  
33 1 0 2.993738 -5.419459 1.665127  
34 6 0 3.138101 -7.324243 1.012829  
35 1 0 3.730014 -7.616708 1.693646  
36 6 0 4.108878 -10.019420 -0.949298  
37 6 0 4.635368 -9.125100 -1.950516  
38 1 0 4.436090 -8.200900 -2.044790  
39 6 0 7.629145 -19.121125 0.347456  
40 1 0 8.529169 -19.328267 0.575542  
41 6 0 7.203055 -17.824423 0.342277  
42 1 0 7.807412 -17.126092 0.557904  
43 6 0 4.545608 -15.701495 1.040470  
44 6 0 4.114108 -16.563586 2.112872  
45 1 0 4.365438 -17.470126 2.246150  
46 6 0 -13.029517 -7.244170 -5.065828  
47 1 0 -13.891777 -6.845259 -5.017294  
48 6 0 -12.451246 -7.768116 -3.945964  
49 1 0 -12.913135 -7.743014 -3.118052  
50 6 0 -9.464677 -8.219822 -2.233451  
51 6 0 -8.957442 -6.973155 -2.751107  
52 1 0 -9.292708 -6.492827 -3.499191  
53 6 0 -6.451767 -11.961754 6.359289  
54 1 0 -6.539434 -11.528078 7.201439  
55 6 0 -7.039503 -11.429512 5.248299  
56 1 0 -7.529630 -10.620195 5.313031  
57 6 0 -8.683784 -12.154287 2.277211  
58 6 0 -9.266616 -13.334698 2.865748  
59 1 0 -8.972774 -13.778718 3.652672  
60 6 0 13.458677 0.470635 6.394785  
61 1 0 13.124686 0.179147 7.236487  
62 6 0 13.294579 -0.306155 5.284524  
63 1 0 12.838580 -1.135178 5.349289  
64 6 0 14.752326 -1.372240 2.318927  
65 6 0 16.064430 -1.285893 2.910845  
66 1 0 16.299939 -0.808221 3.697681  
67 6 0 12.692521 -7.601894 -5.020248  
68 1 0 12.778050 -8.548013 -4.970056  
69 6 0 12.854143 -6.837434 -3.901100  
70 1 0 13.061134 -7.248742 -3.072010

71 6 0 11.747485 -4.022555 -2.195786  
72 6 0 10.415609 -4.207392 -2.716727  
73 1 0 10.169264 -4.739034 -3.464668  
74 6 0 -7.263294 11.497419 6.358246  
75 1 0 -6.846113 11.355188 7.201281  
76 6 0 -6.505557 11.742026 5.249636  
77 1 0 -5.559778 11.761727 5.316900  
78 6 0 -6.303242 13.533035 2.281862  
79 6 0 -7.035648 14.627068 2.870173  
80 1 0 -7.569180 14.593376 3.655638  
81 6 0 0.141298 14.852941 -5.042114  
82 1 0 0.917762 15.400148 -4.990673  
83 6 0 -0.604544 14.612370 -3.924592  
84 1 0 -0.354053 14.998534 -3.095411  
85 6 0 -2.493532 12.249112 -2.220751  
86 6 0 -1.666133 11.187308 -2.737880  
87 1 0 -1.080549 11.238659 -3.484338  
88 6 0 -14.764205 -2.124670 -5.068817  
89 1 0 -15.206384 -2.965519 -5.019558  
90 6 0 -14.623939 -1.355950 -3.949706  
91 1 0 -14.975725 -1.655789 -3.121605  
92 6 0 -12.527725 0.820002 -2.238727  
93 6 0 -11.366952 0.137917 -2.755259  
94 1 0 -11.340912 -0.448061 -3.502719  
95 6 0 -12.413115 5.631688 6.349020  
96 1 0 -12.219397 5.234929 7.191655  
97 6 0 -12.555856 4.850635 5.238797  
98 1 0 -12.453079 3.910145 5.304550  
99 6 0 -14.300982 4.423478 2.267535  
100 6 0 -15.481527 5.007073 2.855043  
101 1 0 -15.518403 5.539082 3.641396  
102 6 0 5.442252 13.795476 -5.032738  
103 1 0 4.935014 14.598763 -4.983566  
104 6 0 6.034892 13.287898 -3.912846  
105 1 0 5.948925 13.741181 -3.084261  
106 6 0 6.866697 10.381880 -2.204194  
107 6 0 5.696979 9.718472 -2.724855  
108 1 0 5.178465 9.990076 -3.473266  
109 6 0 10.953724 7.863385 6.390471  
110 1 0 10.511035 7.892686 7.231984  
111 6 0 10.351620 8.379260 5.279455  
112 1 0 9.485570 8.760395 5.343513  
113 6 0 10.862101 10.108795 2.312226  
114 6 0 11.956222 10.838462 2.903769

115 1 0 12.433313 10.603165 3.691020  
116 6 0 9.126254 -11.663929 -5.026637  
117 1 0 10.075406 -11.626369 -4.974898  
118 6 0 8.387400 -11.925127 -3.909102  
119 1 0 8.820747 -12.078612 -3.079607  
120 6 0 5.450304 -11.195148 -2.207067  
121 6 0 5.462005 -9.849627 -2.725601  
122 1 0 5.958455 -9.535216 -3.472212  
123 6 0 1.203009 -13.488772 6.372830  
124 1 0 1.447501 -13.121356 7.215567  
125 6 0 1.953756 -13.223539 5.264208  
126 1 0 2.716679 -12.664188 5.331156  
127 6 0 3.204182 -14.525766 2.298240  
128 6 0 3.287470 -15.839058 2.887956  
129 1 0 2.843074 -16.135810 3.673573  
130 8 0 -3.105016 -2.482248 0.928118  
131 6 0 -4.954656 -4.504559 0.985197  
132 1 0 -4.993197 -3.826179 1.650999  
133 6 0 -5.855158 -5.530217 0.996921  
134 1 0 -6.516296 -5.572716 1.675521  
135 6 0 -7.779088 -7.647941 -0.970327  
136 6 0 -7.918719 -6.620739 -1.972724  
137 1 0 -7.379757 -5.843808 -2.065691  
138 6 0 -10.369374 -12.726168 1.014086  
139 6 0 -10.305340 -13.687112 2.087365  
140 1 0 -10.885724 -14.427737 2.219172  
141 6 0 19.884813 -5.161717 0.369412  
142 1 0 20.206354 -6.027763 0.596461  
143 6 0 18.543878 -4.907040 0.362593  
144 1 0 17.929312 -5.597083 0.576037  
145 6 0 16.093752 -2.547968 1.061158  
146 6 0 16.891067 -2.010420 2.135761  
147 1 0 17.822303 -2.142537 2.270258  
148 8 0 3.590356 -1.378949 0.940003  
149 6 0 6.266385 -1.969542 1.005126  
150 1 0 5.696382 -2.341103 1.669969  
151 6 0 7.604844 -2.236549 1.020830  
152 1 0 7.970401 -2.786838 1.701243  
153 6 0 10.406133 -2.846458 -0.938307  
154 6 0 9.588972 -3.482865 -1.941642  
155 1 0 8.646900 -3.404718 -2.037245  
156 6 0 -5.582473 19.869688 0.324697  
157 1 0 -4.993831 20.581515 0.552248  
158 6 0 -5.132550 18.581057 0.321028

159 1 0 -4.228246 18.394171 0.537170  
160 6 0 -5.952378 15.280707 1.022386  
161 6 0 -6.819433 15.704050 2.094038  
162 1 0 -7.170991 16.576783 2.226278  
163 8 0 -0.712814 3.867772 0.932465  
164 6 0 -1.539522 6.480672 0.991434  
165 1 0 -0.934520 6.173820 1.658361  
166 6 0 -1.977552 7.773338 1.004017  
167 1 0 -1.685585 8.366091 1.684317  
168 6 0 -2.844395 10.501439 -0.961277  
169 6 0 -1.882349 10.110326 -1.961744  
170 1 0 -1.478739 9.255252 -2.054977  
171 6 0 14.615832 2.129085 5.087086  
172 1 0 15.058013 2.969934 5.037827  
173 6 0 14.475567 1.360364 3.967975  
174 1 0 14.827353 1.660204 3.139874  
175 6 0 12.377948 -0.814985 2.257023  
176 6 0 11.218458 -0.133999 2.773910  
177 1 0 11.192539 0.452476 3.520987  
178 6 0 12.264743 -5.627273 -6.330751  
179 1 0 12.071025 -5.230514 -7.173386  
180 6 0 12.407484 -4.846221 -5.220528  
181 1 0 12.304707 -3.905730 -5.286281  
182 6 0 14.152502 -4.419522 -2.248952  
183 6 0 15.333155 -5.002659 -2.836774  
184 1 0 15.370030 -5.534667 -3.623127  
185 6 0 -5.590624 -13.791062 5.051006  
186 1 0 -5.083387 -14.594348 5.001835  
187 6 0 -6.183264 -13.283483 3.931115  
188 1 0 -6.097298 -13.736766 3.102530  
189 6 0 -7.015069 -10.377467 2.222463  
190 6 0 -5.845352 -9.714057 2.743124  
191 1 0 -5.326837 -9.985661 3.491534  
192 6 0 -11.102097 -7.858970 -6.372202  
193 1 0 -10.659408 -7.888271 -7.213716  
194 6 0 -10.499991 -8.374845 -5.261186  
195 1 0 -9.633942 -8.755981 -5.325244  
196 6 0 -11.010473 -10.104380 -2.293958  
197 6 0 -12.104595 -10.834047 -2.885500  
198 1 0 -12.581685 -10.598751 -3.672751  
199 6 0 -9.274627 11.668344 5.044906  
200 1 0 -10.223778 11.630784 4.993167  
201 6 0 -8.535773 11.929542 3.927371  
202 1 0 -8.969119 12.083027 3.097875

203 6 0 -5.598676 11.199563 2.225336  
204 6 0 -5.610378 9.854042 2.743869  
205 1 0 -6.106826 9.539630 3.490481  
206 6 0 -1.351381 13.493186 -6.354561  
207 1 0 -1.595873 13.125771 -7.197298  
208 6 0 -2.102128 13.227953 -5.245939  
209 1 0 -2.865052 12.668602 -5.312887  
210 6 0 -3.352554 14.530180 -2.279971  
211 6 0 -3.435843 15.843473 -2.869687  
212 1 0 -2.991446 16.140225 -3.655305  
213 8 0 2.956644 2.486663 -0.909849  
214 6 0 4.806284 4.508973 -0.966928  
215 1 0 4.844824 3.830593 -1.632731  
216 6 0 5.706785 5.534632 -0.978652  
217 1 0 6.367923 5.577131 -1.657253  
218 6 0 7.630716 7.652356 0.988596  
219 6 0 7.770346 6.625154 1.990992  
220 1 0 7.231385 5.848222 2.083960  
221 6 0 14.378255 14.705780 -0.289995  
222 1 0 15.289641 14.551573 -0.514877  
223 6 0 13.487220 13.671826 -0.287146  
224 1 0 13.778096 12.794908 -0.501189  
225 6 0 10.221002 12.730583 -0.995817  
226 6 0 10.156967 13.691527 -2.069096  
227 1 0 10.737352 14.432152 -2.200903  
228 6 0 -20.033186 5.166132 -0.351143  
229 1 0 -20.354726 6.032178 -0.578193  
230 6 0 -18.692250 4.911454 -0.344325  
231 1 0 -18.077684 5.601497 -0.557768  
232 6 0 -16.242124 2.552383 -1.042889  
233 6 0 -17.039438 2.014836 -2.117492  
234 1 0 -17.970675 2.146951 -2.251989  
235 8 0 -3.738729 1.383364 -0.921734  
236 6 0 -6.414757 1.973956 -0.986858  
237 1 0 -5.844754 2.345518 -1.651700  
238 6 0 -7.753216 2.240965 -1.002563  
239 1 0 -8.118774 2.791252 -1.682974  
240 6 0 -10.554431 2.851243 0.956286  
241 6 0 -9.737344 3.487280 1.959911  
242 1 0 -8.795273 3.409133 2.055514  
243 6 0 5.434100 -19.865273 -0.306429  
244 1 0 4.845459 -20.577101 -0.533979  
245 6 0 4.984177 -18.576642 -0.302759  
246 1 0 4.079874 -18.389756 -0.518903



247 6 0 5.804006 -15.276293 -1.004117  
248 6 0 6.671060 -15.699635 -2.075769  
249 1 0 7.022618 -16.572368 -2.208009  
250 8 0 0.564441 -3.863358 -0.914196  
251 6 0 1.391150 -6.476257 -0.973165  
252 1 0 0.786147 -6.169405 -1.640092  
253 6 0 1.829180 -7.768923 -0.985748  
254 1 0 1.537213 -8.361676 -1.666049  
255 6 0 2.696022 -10.497025 0.979544  
256 6 0 1.733976 -10.105912 1.980013  
257 1 0 1.330367 -9.250837 2.073246  
258 8 0 3.842957 -0.129074 -0.908323  
259 6 0 6.540972 -0.610526 -0.963940  
260 1 0 6.159432 -0.049146 -1.630466  
261 6 0 7.879479 -0.877535 -0.974909  
262 1 0 8.430513 -0.510094 -1.653699  
263 6 0 10.696157 -1.387610 0.998127  
264 6 0 10.176978 -0.487298 1.994908  
265 1 0 9.280027 -0.194738 2.086088  
266 6 0 20.339603 -2.887661 -0.279727  
267 1 0 20.969605 -2.211434 -0.505093  
268 6 0 19.003572 -2.608322 -0.277643  
269 1 0 18.701546 -1.735432 -0.492708  
270 6 0 15.838269 -3.846756 -0.986465  
271 6 0 16.371879 -4.650244 -2.058390  
272 1 0 17.282981 -4.885648 -2.189628  
273 8 0 -2.144008 -3.323061 -0.918987  
274 6 0 -3.909803 -5.418793 -0.982543  
275 1 0 -3.231104 -5.368022 -1.647198  
276 6 0 -4.810256 -6.444451 -0.997492  
277 1 0 -4.765765 -7.104322 -1.677198  
278 6 0 -6.664206 -8.629794 0.962987  
279 6 0 -5.629137 -8.637075 1.966988  
280 1 0 -4.928647 -8.002253 2.062175  
281 6 0 -11.516450 -11.716134 -0.866906  
282 6 0 -12.320810 -11.911029 -2.109364  
283 1 0 -12.979875 -12.582158 -2.243392  
284 8 0 -1.916594 3.458804 -0.918470  
285 6 0 -2.848491 6.035991 -0.980469  
286 1 0 -3.142110 5.423873 -1.646859  
287 6 0 -3.286473 7.328658 -0.994560  
288 1 0 -3.878386 7.621123 -1.675377  
289 6 0 -4.257250 10.023835 0.967567  
290 6 0 -4.783741 9.129515 1.968785

291 1 0 -4.584462 8.205314 2.063057  
292 6 0 -7.777517 19.125538 -0.329187  
293 1 0 -8.677542 19.332682 -0.557274  
294 6 0 -7.351427 17.828838 -0.324008  
295 1 0 -7.955785 17.130506 -0.539635  
296 6 0 -4.693979 15.705908 -1.022202  
297 6 0 -4.262480 16.568001 -2.094603  
298 1 0 -4.513810 17.474541 -2.227882  
299 6 0 12.881145 7.248584 5.084097  
300 1 0 13.743404 6.849674 5.035563  
301 6 0 12.302874 7.772530 3.964233  
302 1 0 12.764762 7.747428 3.136321  
303 6 0 9.316306 8.224238 2.251719  
304 6 0 8.809070 6.977569 2.769376  
305 1 0 9.144336 6.497241 3.517459  
306 6 0 6.303395 11.966169 -6.341020  
307 1 0 6.391061 11.532492 -7.183170  
308 6 0 6.891131 11.433927 -5.230031  
309 1 0 7.381258 10.624610 -5.294762  
310 6 0 8.535412 12.158702 -2.258942  
311 6 0 9.118244 13.339113 -2.847480  
312 1 0 8.824402 13.783132 -3.634403  
313 6 0 -13.607050 -0.466221 -6.376517  
314 1 0 -13.273057 -0.174733 -7.218218  
315 6 0 -13.442951 0.310571 -5.266255  
316 1 0 -12.986951 1.139594 -5.331020  
317 6 0 -14.900698 1.376655 -2.300658  
318 6 0 -16.212802 1.290309 -2.892577  
319 1 0 -16.448311 0.812635 -3.679412  
320 6 0 -12.840893 7.606309 5.038517  
321 1 0 -12.926422 8.552428 4.988324  
322 6 0 -13.002516 6.841849 3.919368  
323 1 0 -13.209507 7.253156 3.090278  
324 6 0 -11.895858 4.026970 2.214055  
325 6 0 -10.563981 4.211807 2.734996  
326 1 0 -10.317637 4.743449 3.482937  
327 6 0 7.114921 -11.493004 -6.339977  
328 1 0 6.697740 -11.350773 -7.183012  
329 6 0 6.357185 -11.737610 -5.231367  
330 1 0 5.411407 -11.757312 -5.298631  
331 6 0 6.154869 -13.528620 -2.263593  
332 6 0 6.887275 -14.622653 -2.851905  
333 1 0 7.420808 -14.588961 -3.637369  
334 6 0 -0.289671 -14.848527 5.060383

335 1 0 -1.066134 -15.395733 5.008941  
336 6 0 0.456173 -14.607956 3.942860  
337 1 0 0.205681 -14.994119 3.113680  
338 6 0 2.345159 -12.244697 2.239020  
339 6 0 1.517761 -11.182893 2.756149  
340 1 0 0.932177 -11.234244 3.502606  
341 40 0 -2.006788 -0.651812 1.417207  
342 8 0 -1.987588 -0.646638 -0.864509  
343 40 0 0.321987 2.000700 1.421378  
344 8 0 0.322900 1.985044 -0.860370  
345 40 0 1.454739 -1.342337 1.423329  
346 8 0 1.446757 -1.331741 -0.858434  
347 40 0 1.858416 0.656227 -1.398938  
348 8 0 1.839215 0.651053 0.882778  
349 40 0 -1.603111 1.346752 -1.405061  
350 8 0 -1.595128 1.336155 0.876702  
351 40 0 -0.470359 -1.996286 -1.403109  
352 8 0 -0.471272 -1.980631 0.878639  
353 29 0 -13.406316 2.661776 -0.014449  
354 29 0 8.895129 10.218404 0.025202  
355 29 0 4.288628 -12.873558 0.016650  
356 29 0 -9.043501 -10.213989 -0.006933  
357 29 0 13.257059 -2.657812 0.032197  
358 29 0 -4.437001 12.877972 0.001619  
359 8 0 -0.078039 0.002171 2.183028  
360 8 0 -0.070334 0.002244 -2.164760  
361 7 0 -12.181734 1.581209 -1.159378  
362 7 0 -14.633374 3.730012 1.139366  
363 7 0 7.350073 9.699956 -1.124626  
364 7 0 10.430720 10.745147 1.183905  
365 7 0 4.615200 -11.274485 -1.129825  
366 7 0 3.973949 -14.468596 1.172038  
367 7 0 -8.727608 -8.612786 -1.153429  
368 7 0 -9.368859 -11.806897 1.148436  
369 7 0 14.797080 -2.140684 1.191249  
370 7 0 11.716329 -3.186384 -1.116914  
371 7 0 -5.656874 13.954391 1.155448  
372 7 0 -3.205234 11.805589 -1.143297  
373 7 0 12.036195 -1.576508 1.174923  
374 7 0 14.484919 -3.725643 -1.121142  
375 7 0 -7.498446 -9.695541 1.142895  
376 7 0 -10.579092 -10.740732 -1.165636  
377 7 0 -4.763573 11.278900 1.148094  
378 7 0 -4.122322 14.473011 -1.153769

379 7 0 8.579236 8.617200 1.171697  
380 7 0 9.220487 11.811311 -1.130167  
381 7 0 -14.945401 2.145346 -1.173158  
382 7 0 -11.864754 3.190537 1.135373  
383 7 0 5.508501 -13.949977 -1.137179  
384 7 0 3.056862 -11.801174 1.161566  
385 6 0 -4.440240 0.873173 0.001411  
386 6 0 -5.899244 1.164223 -0.001170  
387 6 0 -8.591882 1.701365 -0.005933  
388 6 0 -10.041315 1.990507 -0.008497  
389 6 0 -20.913388 4.159330 -0.027729  
390 6 0 -18.220749 3.622187 -0.022966  
391 6 0 -16.771315 3.333045 -0.020402  
392 6 0 2.863117 3.347844 0.014397  
393 6 0 3.844676 4.465855 0.016155  
394 6 0 5.656173 6.529180 0.019400  
395 6 0 6.631293 7.639859 0.021147  
396 6 0 13.945581 15.970952 0.034250  
397 6 0 12.134084 13.907627 0.031005  
398 6 0 11.158964 12.796949 0.029258  
399 6 0 1.354564 -4.214395 0.011595  
400 6 0 1.832009 -5.623456 0.012418  
401 6 0 2.713150 -8.223924 0.013936  
402 6 0 3.187463 -9.623743 0.014753  
403 6 0 6.745247 -20.123660 0.020881  
404 6 0 5.864106 -17.523192 0.019363  
405 6 0 5.389793 -16.123373 0.018546  
406 6 0 -12.353654 -7.297999 -6.263040  
407 6 0 -11.166368 -8.343906 -4.019099  
408 6 0 -10.527258 -8.906914 -2.811196  
409 6 0 -5.733348 -13.129979 6.249172  
410 6 0 -6.920635 -12.084072 4.005231  
411 6 0 -7.559745 -11.521064 2.797328  
412 6 0 14.111477 1.676750 6.284592  
413 6 0 13.805331 0.122190 4.042169  
414 6 0 13.640359 -0.715239 2.835574  
415 6 0 12.404409 -6.991473 -6.219156  
416 6 0 12.710555 -5.436913 -3.976733  
417 6 0 12.875352 -4.600102 -2.769647  
418 6 0 -8.633920 11.459536 6.244445  
419 6 0 -7.128568 11.968301 4.005267  
420 6 0 -6.318244 12.242167 2.799929  
421 6 0 -0.240082 14.296410 -6.241207  
422 6 0 -1.745433 13.787645 -4.002029

423 6 0 -2.555757 13.513778 -2.796691  
424 6 0 -14.259849 -1.672335 -6.266323  
425 6 0 -13.953704 -0.117775 -4.023900  
426 6 0 -13.788907 0.719037 -2.816814  
427 6 0 -12.552781 6.995887 6.237425  
428 6 0 -12.858928 5.441328 3.995002  
429 6 0 -13.023724 4.604516 2.787916  
430 6 0 5.584976 13.134394 -6.230903  
431 6 0 6.772262 12.088486 -3.986962  
432 6 0 7.411372 11.525479 -2.779059  
433 6 0 12.205282 7.302414 6.281308  
434 6 0 11.017995 8.348321 4.037367  
435 6 0 10.378885 8.911329 2.829465  
436 6 0 8.485547 -11.455121 -6.226177  
437 6 0 6.980196 -11.963887 -3.986998  
438 6 0 6.169873 -12.237752 -2.781660  
439 6 0 0.091709 -14.291995 6.259476  
440 6 0 1.597061 -13.783230 4.020298  
441 6 0 2.407385 -13.509364 2.814959  
442 6 0 -3.011490 -3.343429 0.003872  
443 6 0 -3.993048 -4.461441 0.002114  
444 6 0 -5.804546 -6.524766 -0.001132  
445 6 0 -6.779666 -7.635444 -0.002878  
446 6 0 -11.307336 -12.792534 -0.010990  
447 6 0 20.765015 -4.154915 0.045997  
448 6 0 18.072377 -3.617773 0.041235  
449 6 0 16.622943 -3.328631 0.038671  
450 6 0 4.291868 -0.868758 0.016858  
451 6 0 5.750871 -1.159808 0.019438  
452 6 0 8.443439 -1.697301 0.024476  
453 6 0 9.892856 -1.985625 0.026549  
454 6 0 -6.893620 20.128075 -0.002613  
455 6 0 -6.012479 17.527606 -0.001094  
456 6 0 -5.538165 16.127787 -0.000278  
457 6 0 -1.502936 4.218809 0.006673  
458 6 0 -1.980382 5.627871 0.005851  
459 6 0 -2.861522 8.228339 0.004333  
460 6 0 -3.335836 9.628158 0.003516  
461 1 0 -7.237001 21.141479 -0.003204  
462 1 0 -9.140463 11.282096 7.029512  
463 1 0 0.346556 14.494676 -7.113817  
464 1 0 -14.365886 -2.210773 -7.043010  
465 1 0 -21.846010 4.345375 -0.029379  
466 1 0 -12.443624 7.519742 7.023594

467 1 0 -12.764883 -6.935738 -7.040252  
 468 6 0 -12.323365 -13.949808 -0.012810  
 469 6 0 -13.587712 -13.768858 0.548578  
 470 6 0 -11.979688 -15.178835 -0.575771  
 471 6 0 -14.507871 -14.816965 0.547564  
 472 1 0 -13.821607 -12.930741 0.933055  
 473 6 0 -12.900360 -16.227057 -0.577748  
 474 1 0 -11.117675 -15.302318 -0.958732  
 475 6 0 -14.164254 -16.046371 -0.016089  
 476 1 0 -15.369801 -14.693818 0.930819  
 477 1 0 -12.665849 -17.065070 -0.962077  
 478 1 0 -14.792035 -16.761118 -0.016725  
 479 1 0 -5.322119 -13.492241 7.026384  
 480 1 0 -0.429685 -14.468211 7.035038  
 481 1 0 7.050440 -21.024359 0.021407  
 482 1 0 9.006941 -11.278905 -7.001739  
 483 1 0 12.298372 -7.529911 -6.995842  
 484 1 0 21.697638 -4.340960 0.047647  
 485 1 0 14.217514 2.215188 7.061278  
 486 1 0 12.616511 6.940152 7.058521  
 487 1 0 14.573013 16.685606 0.035374  
 488 1 0 5.173746 13.496655 -7.008116  
 489 6 0 13.516381 -0.833016 -1.323828  
 490 8 0 13.608655 0.071032 -2.004097

MeOH--Zr<sub>6</sub>O<sub>8</sub> (TCPP-Cu)<sub>6</sub>

-----  
 Center Atomic Atomic Coordinates (Angstroms)  
 Number Number Type X Y Z

-----  
 1 8 0 -3.632511 -1.422060 -0.954203  
 2 6 0 -6.014647 -2.776945 -1.016549  
 3 1 0 -5.841038 -2.119668 -1.681999  
 4 6 0 -7.187076 -3.475671 -1.030862  
 5 1 0 -7.827680 -3.312665 -1.710910  
 6 6 0 -9.673799 -4.898364 0.930892  
 7 6 0 -9.492756 -3.877993 1.933641  
 8 1 0 -8.741049 -3.304645 2.028262  
 9 6 0 -18.261769 -9.532788 -0.366703  
 10 1 0 -19.080949 -9.105580 -0.593446  
 11 6 0 -17.095771 -8.823257 -0.361279  
 12 1 0 -17.102160 -7.899393 -0.575387  
 13 6 0 -13.696827 -8.932988 -1.062326  
 14 6 0 -13.929245 -9.867055 -2.136077

15 1 0 -14.709104 -10.393111 -2.269604  
16 8 0 3.077444 -2.432958 -0.950989  
17 6 0 5.441951 -3.818492 -1.010736  
18 1 0 4.786752 -3.996622 -1.677040  
19 6 0 6.633297 -4.484479 -1.023733  
20 1 0 6.813272 -5.120601 -1.703709  
21 6 0 9.106318 -5.927161 0.940742  
22 6 0 8.130890 -6.280794 1.942202  
23 1 0 7.258385 -5.916493 2.035830  
24 6 0 17.415431 -11.047046 -0.347781  
25 1 0 17.455328 -11.970028 -0.574693  
26 6 0 16.217954 -10.392029 -0.343685  
27 1 0 15.421323 -10.859443 -0.558888  
28 6 0 14.614381 -7.393426 -1.046010  
29 6 0 15.540843 -7.127420 -2.118552  
30 1 0 16.386515 -7.539738 -2.251131  
31 8 0 0.597927 3.883482 -0.949354  
32 6 0 0.615655 6.623987 -1.008434  
33 1 0 1.098344 6.145791 -1.674253  
34 6 0 0.596761 7.988719 -1.021133  
35 1 0 1.058512 8.462804 -1.700425  
36 6 0 0.607220 10.851296 0.944032  
37 6 0 1.399950 10.183132 1.946316  
38 1 0 1.520592 9.245348 2.039873  
39 6 0 0.888209 20.607445 -0.341846  
40 1 0 1.667866 21.103541 -0.567675  
41 6 0 0.919680 19.242891 -0.338031  
42 1 0 1.723053 18.786746 -0.552349  
43 6 0 -0.874530 16.355020 -1.043256  
44 6 0 -1.566802 17.024609 -2.116499  
45 1 0 -1.632396 17.963173 -2.248938  
46 6 0 -14.629132 2.506851 5.017879  
47 1 0 -15.308526 1.842904 4.967133  
48 6 0 -14.256578 3.195028 3.899563  
49 1 0 -14.681712 3.017966 3.070517  
50 6 0 -11.588587 4.620111 2.194483  
51 6 0 -10.695245 3.613910 2.713073  
52 1 0 -10.852491 3.048402 3.460215  
53 6 0 -9.979392 9.162499 -6.389925  
54 1 0 -9.915300 8.725332 -7.232394  
55 6 0 -10.358078 8.463350 -5.280509  
56 1 0 -10.549599 7.536876 -5.346642  
57 6 0 -12.156620 8.594188 -2.313280  
58 6 0 -13.098929 9.512762 -2.902952

59 1 0 -12.968514 10.030253 -3.689044  
60 6 0 12.940116 4.094227 -6.379714  
61 1 0 12.529822 4.258307 -7.222159  
62 6 0 12.523520 4.770432 -5.269666  
63 1 0 11.816957 5.399610 -5.335344  
64 6 0 13.534869 6.259066 -2.300244  
65 6 0 14.801776 6.616545 -2.888967  
66 1 0 15.185055 6.245792 -3.675341  
67 6 0 9.496295 11.435273 5.035401  
68 1 0 9.261018 12.355677 4.985653  
69 6 0 9.906460 10.769872 3.916464  
70 1 0 9.966031 11.227566 3.087985  
71 6 0 9.807332 7.748814 2.207749  
72 6 0 8.489050 7.477640 2.725471  
73 1 0 8.077618 7.895685 3.472938  
74 6 0 -2.908885 -13.220514 -6.396664  
75 1 0 -2.561291 -12.946226 -7.238639  
76 6 0 -2.115434 -13.199153 -5.286261  
77 1 0 -1.217242 -12.901762 -5.351212  
78 6 0 -1.333144 -14.822854 -2.318443  
79 6 0 -1.656768 -16.098065 -2.908816  
80 1 0 -2.169163 -16.243683 -3.695577  
81 6 0 5.165826 -13.922174 5.020973  
82 1 0 6.080581 -14.178562 4.971299  
83 6 0 4.384955 -13.943356 3.901686  
84 1 0 4.751886 -14.222808 3.073026  
85 6 0 1.818912 -12.344949 2.193807  
86 6 0 2.242995 -11.068313 2.713224  
87 1 0 2.810439 -10.921914 3.461101  
88 6 0 -14.554275 -2.898037 5.015353  
89 1 0 -15.251796 -2.253113 4.965219  
90 6 0 -14.162818 -3.574587 3.896400  
91 1 0 -14.592704 -3.408593 3.067513  
92 6 0 -11.456407 -4.923642 2.190024  
93 6 0 -10.591267 -3.893571 2.709566  
94 1 0 -10.764104 -3.333332 3.457232  
95 6 0 -9.722141 -9.411696 -6.398605  
96 1 0 -9.670190 -8.972135 -7.240665  
97 6 0 -10.120029 -8.724340 -5.288542  
98 1 0 -10.337135 -7.803464 -5.353811  
99 6 0 -11.914220 -8.907711 -2.321459  
100 6 0 -12.830735 -9.851477 -2.912001  
101 1 0 -12.686049 -10.364424 -3.698574  
102 6 0 9.809168 -11.154903 5.024845



103 1 0 9.599471 -12.081424 4.974232  
104 6 0 10.200733 -10.477353 3.906534  
105 1 0 10.272947 -10.932447 3.077629  
106 6 0 10.017954 -7.458603 2.200642  
107 6 0 8.692674 -7.224527 2.718600  
108 1 0 8.292988 -7.654504 3.465671  
109 6 0 13.048214 -3.710634 -6.383362  
110 1 0 12.642609 -3.885226 -7.225964  
111 6 0 12.650518 -4.399155 -5.273952  
112 1 0 11.961649 -5.047597 -5.340226  
113 6 0 13.702745 -5.861983 -2.305908  
114 6 0 14.979058 -6.183687 -2.894949  
115 1 0 15.351912 -5.801727 -3.680971  
116 6 0 4.778096 14.072889 5.034057  
117 1 0 5.685398 14.354558 4.984634  
118 6 0 3.996922 14.073484 3.914779  
119 1 0 4.355964 14.363765 3.086386  
120 6 0 1.476110 12.406220 2.205374  
121 6 0 1.935392 11.141334 2.723603  
122 1 0 2.506683 11.010008 3.471351  
123 6 0 -3.274233 13.158542 -6.384336  
124 1 0 -2.919188 12.894773 -7.226562  
125 6 0 -2.480481 13.158126 -5.273943  
126 1 0 -1.574399 12.885785 -5.339161  
127 6 0 -1.743420 14.800096 -2.304599  
128 6 0 -2.102245 16.066406 -2.893785  
129 1 0 -2.618486 16.198513 -3.680416  
130 8 0 -3.670759 1.339493 -0.952912  
131 6 0 -6.089504 2.627944 -1.014023  
132 1 0 -5.897767 1.976349 -1.680085  
133 6 0 -7.280835 3.293944 -1.027700  
134 1 0 -7.916688 3.113895 -1.707907  
135 6 0 -9.805980 4.645388 0.935352  
136 6 0 -9.596735 3.629487 1.937150  
137 1 0 -8.829436 3.077089 2.031245  
138 6 0 -13.939228 8.568910 -1.054147  
139 6 0 -14.197439 9.497185 -2.127028  
140 1 0 -14.991569 10.001567 -2.260074  
141 6 0 17.102558 11.543130 -0.337225  
142 1 0 17.116875 12.467074 -0.563272  
143 6 0 15.923681 10.855197 -0.333754  
144 1 0 15.114408 11.300571 -0.548532  
145 6 0 14.403759 7.813991 -1.038902  
146 6 0 15.337219 7.574747 -2.111681

147 1 0 16.171146 8.010452 -2.243864  
148 8 0 3.008626 2.535829 -0.948667  
149 6 0 5.333854 3.986370 -1.007088  
150 1 0 4.673965 4.146910 -1.673234  
151 6 0 6.506299 4.685108 -1.019448  
152 1 0 6.668579 5.326606 -1.698827  
153 6 0 8.938441 6.193890 0.946407  
154 6 0 7.953607 6.519438 1.948184  
155 1 0 7.091528 6.131025 2.041460  
156 6 0 1.458333 -20.556925 -0.361083  
157 1 0 2.251428 -21.031027 -0.587367  
158 6 0 1.452002 -19.192027 -0.355993  
159 1 0 2.242431 -18.713607 -0.569874  
160 6 0 -0.421508 -16.354296 -1.058543  
161 6 0 -1.094983 -17.041798 -2.132420  
162 1 0 -1.134561 -17.981694 -2.265736  
163 8 0 0.704992 -3.846856 -0.952967  
164 6 0 0.798609 -6.585762 -1.014607  
165 1 0 1.267862 -6.093760 -1.679973  
166 6 0 0.817518 -7.950483 -1.028582  
167 1 0 1.292213 -8.410962 -1.708311  
168 6 0 0.907276 -10.813507 0.933908  
169 6 0 1.681211 -10.124581 1.936826  
170 1 0 1.775836 -9.183904 2.031259  
171 6 0 14.581830 2.916136 -5.069593  
172 1 0 15.279353 2.271212 -5.019459  
173 6 0 14.190374 3.592686 -3.950640  
174 1 0 14.620260 3.426691 -3.121753  
175 6 0 11.483962 4.941740 -2.244264  
176 6 0 10.618822 3.911669 -2.763805  
177 1 0 10.791660 3.351430 -3.511472  
178 6 0 9.749696 9.429794 6.344365  
179 1 0 9.697746 8.990233 7.186425  
180 6 0 10.147585 8.742439 5.234302  
181 1 0 10.364691 7.821562 5.299571  
182 6 0 11.941775 8.925810 2.267218  
183 6 0 12.858290 9.869577 2.857761  
184 1 0 12.713605 10.382523 3.644334  
185 6 0 -9.781612 11.173001 -5.079084  
186 1 0 -9.571915 12.099523 -5.028472  
187 6 0 -10.173178 10.495452 -3.960774  
188 1 0 -10.245391 10.950546 -3.131869  
189 6 0 -9.990399 7.476702 -2.254883  
190 6 0 -8.665119 7.242625 -2.772840

191 1 0 -8.265433 7.672603 -3.519911  
192 6 0 -13.020658 3.728732 6.329122  
193 1 0 -12.615053 3.903325 7.171725  
194 6 0 -12.622962 4.417253 5.219711  
195 1 0 -11.934094 5.065695 5.285986  
196 6 0 -13.675189 5.880082 2.251669  
197 6 0 -14.951503 6.201785 2.840709  
198 1 0 -15.324357 5.819825 3.626731  
199 6 0 -4.750541 -14.054791 -5.088297  
200 1 0 -5.657842 -14.336460 -5.038874  
201 6 0 -3.969367 -14.055385 -3.969020  
202 1 0 -4.328409 -14.345666 -3.140626  
203 6 0 -1.448554 -12.388122 -2.259614  
204 6 0 -1.907837 -11.123235 -2.777842  
205 1 0 -2.479126 -10.991909 -3.525591  
206 6 0 3.301788 -13.140443 6.330095  
207 1 0 2.946743 -12.876675 7.172322  
208 6 0 2.508037 -13.140027 5.219703  
209 1 0 1.601955 -12.867687 5.284920  
210 6 0 1.770976 -14.781997 2.250359  
211 6 0 2.129800 -16.048308 2.839545  
212 1 0 2.646042 -16.180415 3.626175  
213 8 0 3.698341 -1.321388 0.898743  
214 6 0 6.117059 -2.609844 0.959783  
215 1 0 5.925322 -1.958251 1.625845  
216 6 0 7.308391 -3.275846 0.973459  
217 1 0 7.944243 -3.095796 1.653667  
218 6 0 9.833535 -4.627290 -0.989592  
219 6 0 9.624290 -3.611388 -1.991390  
220 1 0 8.856991 -3.058990 -2.085485  
221 6 0 18.546576 -9.023308 0.303783  
222 1 0 19.353614 -8.573789 0.530935  
223 6 0 17.361376 -8.346336 0.299007  
224 1 0 17.342178 -7.422849 0.513978  
225 6 0 13.966784 -8.550812 0.999907  
226 6 0 14.224994 -9.479087 2.072788  
227 1 0 15.019124 -9.983468 2.205833  
228 6 0 -17.075002 -11.525031 0.282984  
229 1 0 -17.089320 -12.448976 0.509032  
230 6 0 -15.896125 -10.837098 0.279515  
231 1 0 -15.086853 -11.282472 0.494292  
232 6 0 -14.376203 -7.795893 0.984662  
233 6 0 -15.309662 -7.556649 2.057441  
234 1 0 -16.143590 -7.992353 2.189623

235 8 0 -2.981071 -2.517731 0.894427  
236 6 0 -5.306298 -3.968271 0.952849  
237 1 0 -4.646409 -4.128812 1.618994  
238 6 0 -6.478743 -4.667010 0.965208  
239 1 0 -6.641024 -5.308508 1.644586  
240 6 0 -8.910886 -6.175792 -1.000647  
241 6 0 -7.926052 -6.501339 -2.002424  
242 1 0 -7.063973 -6.112927 -2.095700  
243 6 0 -1.430777 20.575023 0.306843  
244 1 0 -2.223872 21.049127 0.533126  
245 6 0 -1.424446 19.210125 0.301753  
246 1 0 -2.214876 18.731706 0.515634  
247 6 0 0.449063 16.372395 1.004303  
248 6 0 1.122539 17.059896 2.078179  
249 1 0 1.162117 17.999792 2.211496  
250 8 0 -0.677446 3.864964 0.898759  
251 6 0 -0.771054 6.603860 0.960366  
252 1 0 -1.240307 6.111858 1.625733  
253 6 0 -0.789963 7.968581 0.974341  
254 1 0 -1.264658 8.429060 1.654071  
255 6 0 -0.879721 10.831605 -0.988148  
256 6 0 -1.653655 10.142680 -1.991066  
257 1 0 -1.748280 9.202002 -2.085500  
258 8 0 3.660075 1.440156 0.899987  
259 6 0 6.042202 2.795043 0.962309  
260 1 0 5.868593 2.137766 1.627759  
261 6 0 7.214632 3.493769 0.976623  
262 1 0 7.855235 3.330763 1.656670  
263 6 0 9.701355 4.916462 -0.985133  
264 6 0 9.520311 3.896092 -1.987881  
265 1 0 8.768605 3.322743 -2.082503  
266 6 0 18.289324 9.550886 0.312464  
267 1 0 19.108505 9.123678 0.539206  
268 6 0 17.123327 8.841355 0.307039  
269 1 0 17.129715 7.917491 0.521148  
270 6 0 13.724382 8.951087 1.008087  
271 6 0 13.956800 9.885153 2.081837  
272 1 0 14.736660 10.411210 2.215365  
273 8 0 -3.049885 2.451044 0.896717  
274 6 0 -5.414395 3.836590 0.956496  
275 1 0 -4.759197 4.014721 1.622800  
276 6 0 -6.605741 4.502578 0.969493  
277 1 0 -6.785717 5.138699 1.649469  
278 6 0 -9.078763 5.945260 -0.994983

279 6 0 -8.103334 6.298893 -1.996443  
280 1 0 -7.230830 5.934592 -2.090070  
281 6 0 -14.687261 7.231779 0.823780  
282 6 0 -15.513287 7.145518 2.064311  
283 1 0 -16.358959 7.557836 2.196891  
284 8 0 -0.570370 -3.865382 0.895108  
285 6 0 -0.588100 -6.605888 0.954193  
286 1 0 -1.070789 -6.127692 1.620013  
287 6 0 -0.569205 -7.970621 0.966892  
288 1 0 -1.030956 -8.444706 1.646185  
289 6 0 -0.579665 -10.833198 -0.998273  
290 6 0 -1.372394 -10.165033 -2.000556  
291 1 0 -1.493036 -9.227249 -2.094112  
292 6 0 -0.860653 -20.589346 0.287606  
293 1 0 -1.640310 -21.085443 0.513436  
294 6 0 -0.892124 -19.224792 0.283791  
295 1 0 -1.695498 -18.768647 0.498109  
296 6 0 0.902086 -16.336921 0.989017  
297 6 0 1.594357 -17.006511 2.062259  
298 1 0 1.659951 -17.945075 2.194698  
299 6 0 14.656687 -2.488752 -5.072119  
300 1 0 15.336082 -1.824806 -5.021374  
301 6 0 14.284133 -3.176929 -3.953804  
302 1 0 14.709267 -2.999868 -3.124757  
303 6 0 11.616143 -4.602014 -2.248724  
304 6 0 10.722800 -3.595812 -2.767314  
305 1 0 10.880047 -3.030303 -3.514454  
306 6 0 10.006948 -9.144400 6.335685  
307 1 0 9.942855 -8.707234 7.178154  
308 6 0 10.385634 -8.445252 5.226270  
309 1 0 10.577154 -7.518778 5.292402  
310 6 0 12.184175 -8.576090 2.259039  
311 6 0 13.126485 -9.494664 2.848711  
312 1 0 12.996070 -10.012155 3.634803  
313 6 0 -12.912561 -4.076129 6.325475  
314 1 0 -12.502266 -4.240208 7.167919  
315 6 0 -12.495963 -4.752334 5.215426  
316 1 0 -11.789400 -5.381512 5.281103  
317 6 0 -13.507313 -6.240969 2.246004  
318 6 0 -14.774220 -6.598447 2.834727  
319 1 0 -15.157500 -6.227693 3.621101  
320 6 0 -9.468740 -11.417175 -5.089641  
321 1 0 -9.233462 -12.337580 -5.039892  
322 6 0 -9.878904 -10.751774 -3.970703

323 1 0 -9.938476 -11.209468 -3.142225  
324 6 0 -9.779777 -7.730716 -2.261989  
325 6 0 -8.461495 -7.459541 -2.779711  
326 1 0 -8.050063 -7.877587 -3.527178  
327 6 0 2.936440 13.238612 6.342423  
328 1 0 2.588847 12.964324 7.184399  
329 6 0 2.142991 13.217251 5.232020  
330 1 0 1.244798 12.919860 5.296972  
331 6 0 1.360700 14.840953 2.264202  
332 6 0 1.684323 16.116164 2.854577  
333 1 0 2.196719 16.261782 3.641337  
334 6 0 -5.138271 13.940273 -5.075214  
335 1 0 -6.053025 14.196660 -5.025539  
336 6 0 -4.357399 13.961455 -3.955927  
337 1 0 -4.724331 14.240906 -3.127267  
338 6 0 -1.791357 12.363047 -2.248048  
339 6 0 -2.215440 11.086411 -2.767464  
340 1 0 -2.782883 10.940013 -3.515341  
341 40 0 -2.023143 -0.018502 -1.439761  
342 8 0 -2.008386 -0.019364 0.841974  
343 40 0 1.057845 -1.740868 -1.438883  
344 8 0 1.048400 -1.728209 0.842874  
345 40 0 1.008963 1.788528 -1.437233  
346 8 0 0.999902 1.773481 0.844509  
347 40 0 2.050619 0.036498 1.385304  
348 8 0 2.035953 0.037480 -0.896234  
349 40 0 -0.981353 -1.770462 1.382997  
350 8 0 -0.972369 -1.755362 -0.898741  
351 40 0 -1.030292 1.758965 1.384643  
352 8 0 -1.020840 1.746304 -0.897105  
353 29 0 -11.664429 -6.950759 -0.036855  
354 29 0 11.880254 -6.624673 -0.023738  
355 29 0 -0.174492 13.602579 -0.020767  
356 29 0 -11.852699 6.642771 -0.030503  
357 29 0 11.691985 6.968857 -0.017385  
358 29 0 0.202047 -13.584480 -0.033473  
359 8 0 0.014975 0.010082 -2.201016  
360 8 0 0.012584 0.008115 2.146902  
361 7 0 -10.873638 -5.524438 1.111338  
362 7 0 -12.461654 -8.366274 -1.193937  
363 7 0 10.248209 -6.653257 1.122430  
364 7 0 13.506169 -6.607059 -1.178805  
365 7 0 0.664867 12.203208 1.126109  
366 7 0 -1.001273 15.002128 -1.176529

367 7 0 -11.022694 5.237826 1.116367  
368 7 0 -12.688834 8.036746 -1.186272  
369 7 0 13.317748 6.997359 -1.172448  
370 7 0 10.059788 6.951161 1.128787  
371 7 0 -0.585672 -15.005309 -1.190552  
372 7 0 1.002344 -12.163474 1.114722  
373 7 0 10.901193 5.542537 -1.165578  
374 7 0 12.489209 8.384372 1.139697  
375 7 0 -10.220654 6.671355 -1.176670  
376 7 0 -13.478614 6.625157 1.124565  
377 7 0 -0.637311 -12.185110 -1.180350  
378 7 0 1.028829 -14.984030 1.122288  
379 7 0 11.050250 -5.219727 -1.170608  
380 7 0 12.716390 -8.018646 1.132031  
381 7 0 -13.290193 -6.979261 1.118208  
382 7 0 -10.032233 -6.933063 -1.183028  
383 7 0 0.613227 15.023408 1.136312  
384 7 0 -0.974789 12.181572 -1.168963  
385 6 0 -3.810644 -2.270174 -0.030308  
386 6 0 -5.088650 -3.031822 -0.031373  
387 6 0 -7.447252 -4.437467 -0.033340  
388 6 0 -8.716875 -5.194119 -0.034398  
389 6 0 -18.240208 -10.869697 -0.042336  
390 6 0 -15.881606 -9.464051 -0.040370  
391 6 0 -14.611982 -8.707399 -0.039312  
392 6 0 3.899854 -2.163386 -0.026013  
393 6 0 5.198464 -2.889348 -0.025643  
394 6 0 7.595090 -4.229135 -0.024960  
395 6 0 8.885182 -4.950336 -0.024592  
396 6 0 18.562044 -10.359997 -0.021834  
397 6 0 16.165418 -9.020210 -0.022517  
398 6 0 14.875326 -8.299009 -0.022885  
399 6 0 -0.047878 4.460707 -0.025039  
400 6 0 -0.068481 5.948317 -0.024344  
401 6 0 -0.106505 8.693749 -0.023062  
402 6 0 -0.126973 10.171602 -0.022371  
403 6 0 -0.280503 21.256841 -0.017190  
404 6 0 -0.242479 18.511408 -0.018473  
405 6 0 -0.222011 17.033556 -0.019164  
406 6 0 -14.012729 2.782069 6.216755  
407 6 0 -13.237969 4.166826 3.975988  
408 6 0 -12.820920 4.912234 2.769793  
409 6 0 -9.692669 10.503472 -6.277759  
410 6 0 -10.467429 9.118715 -4.036992

411 6 0 -10.884478 8.373307 -2.830798  
412 6 0 13.958025 3.175297 -6.268220  
413 6 0 13.145241 4.535972 -4.026169  
414 6 0 12.707724 5.268417 -2.819284  
415 6 0 9.425943 10.762418 6.233449  
416 6 0 10.238727 9.401743 3.991399  
417 6 0 10.676245 8.669298 2.784513  
418 6 0 -4.213701 -13.642717 -6.286212  
419 6 0 -2.629860 -13.621829 -4.043478  
420 6 0 -1.777285 -13.610584 -2.836226  
421 6 0 4.617796 -13.526245 6.219266  
422 6 0 3.033955 -13.547133 3.976532  
423 6 0 2.181380 -13.558377 2.769280  
424 6 0 -13.930470 -3.157199 6.213980  
425 6 0 -13.117686 -4.517874 3.971929  
426 6 0 -12.680168 -5.250319 2.765044  
427 6 0 -9.398387 -10.744319 -6.287690  
428 6 0 -10.211172 -9.383645 -4.045639  
429 6 0 -10.648689 -8.651200 -2.838754  
430 6 0 9.720224 -10.485374 6.223519  
431 6 0 10.494984 -9.100617 3.982752  
432 6 0 10.912033 -8.355209 2.776557  
433 6 0 14.040284 -2.763971 -6.270995  
434 6 0 13.265524 -4.148728 -4.030227  
435 6 0 12.848475 -4.894136 -2.824034  
436 6 0 4.241257 13.660815 6.231971  
437 6 0 2.657415 13.639927 3.989238  
438 6 0 1.804842 13.628683 2.781986  
439 6 0 -4.590241 13.544343 -6.273506  
440 6 0 -3.006400 13.565231 -4.030772  
441 6 0 -2.153825 13.576475 -2.823520  
442 6 0 -3.872299 2.181484 -0.028228  
443 6 0 -5.170909 2.907447 -0.028598  
444 6 0 -7.567534 4.247233 -0.029281  
445 6 0 -8.857627 4.968434 -0.029649  
446 6 0 -14.847771 8.317107 -0.031356  
447 6 0 18.267763 10.887795 -0.011903  
448 6 0 15.909162 9.482150 -0.013870  
449 6 0 14.639538 8.725498 -0.014928  
450 6 0 3.838199 2.288272 -0.023932  
451 6 0 5.116205 3.049920 -0.022866  
452 6 0 7.474807 4.455565 -0.020901  
453 6 0 8.744431 5.212217 -0.019842  
454 6 0 0.308058 -21.238743 -0.037050



455 6 0 0.270035 -18.493310 -0.035767  
456 6 0 0.249566 -17.015457 -0.035076  
457 6 0 0.075433 -4.442609 -0.029200  
458 6 0 0.096036 -5.930219 -0.029896  
459 6 0 0.134060 -8.675651 -0.031179  
460 6 0 0.154529 -10.153504 -0.031869  
461 1 0 0.322877 -22.308639 -0.037550  
462 1 0 -4.748671 -13.643828 -7.072473  
463 1 0 5.235021 -13.518105 7.093261  
464 1 0 -14.211987 -2.685916 6.990537  
465 1 0 -19.057134 -11.356556 -0.043017  
466 1 0 -9.118780 -11.200804 -7.073718  
467 1 0 -14.281075 2.302444 6.992868  
468 6 0 -16.191986 9.068564 -0.031739  
469 6 0 -17.322032 8.476303 -0.596267  
470 6 0 -16.279798 10.341208 0.532366  
471 6 0 -18.539419 9.156884 -0.597248  
472 1 0 -17.261705 7.608600 -0.981523  
473 6 0 -17.497709 11.021724 0.532347  
474 1 0 -15.509388 10.745110 0.917468  
475 6 0 -18.627417 10.429863 -0.032452  
476 1 0 -19.309863 8.753325 -0.982645  
477 1 0 -17.557421 11.889535 0.917456  
478 1 0 -19.457872 10.893883 -0.033177  
479 1 0 -9.424322 10.983098 -7.053872  
480 1 0 -5.138821 13.537108 -7.050300  
481 1 0 -0.293673 22.207750 -0.016746  
482 1 0 4.789836 13.668049 7.008765  
483 1 0 9.144427 11.233701 7.010006  
484 1 0 19.084689 11.374654 -0.011222  
485 1 0 14.239542 2.704014 -7.044777  
486 1 0 14.308631 -2.284346 -7.047108  
487 1 0 19.392141 -10.824045 -0.021597  
488 1 0 9.451877 -10.964999 6.999633  
489 6 0 -2.413973 -1.203564 4.009591  
490 1 0 -2.843128 -2.063939 4.544621  
491 1 0 -2.482373 -0.301139 4.631248  
492 1 0 -2.961636 -1.047757 3.053952  
493 8 0 -1.086179 -1.485129 3.758682  
494 1 0 -0.394279 -0.476864 3.035828

Zr<sub>6</sub>O<sub>8</sub>(TCPP-Cu)<sub>6</sub>--MeOH

-----  
Center Atomic Atomic Coordinates (Angstroms)

Number Number Type X Y Z

-----  
1 8 0 1.822722 3.423308 0.951663  
2 6 0 3.480798 5.605210 1.016959  
3 1 0 2.804655 5.520488 1.680759  
4 6 0 4.328507 6.674860 1.032807  
5 1 0 4.250007 7.331781 1.712293  
6 6 0 6.072726 8.950323 -0.925839  
7 6 0 5.039896 8.905355 -1.931164  
8 1 0 4.372345 8.236088 -2.027090  
9 6 0 11.799702 16.850123 0.381749  
10 1 0 11.484099 17.718763 0.607214  
11 6 0 10.942111 15.788283 0.374761  
12 1 0 10.026683 15.917005 0.586496  
13 6 0 10.599272 12.405107 1.076839  
14 6 0 11.553178 12.512460 2.152933  
15 1 0 12.177482 13.215912 2.287638  
16 8 0 1.936687 -3.361412 0.952527  
17 6 0 2.996942 -5.888457 1.016354  
18 1 0 3.258543 -5.262224 1.682968  
19 6 0 3.499364 -7.157457 1.031323  
20 1 0 4.104359 -7.419658 1.712969  
21 6 0 4.606994 -9.800755 -0.928896  
22 6 0 5.089129 -8.881270 -1.929660  
23 1 0 4.843743 -7.968279 -2.024416  
24 6 0 8.578893 -18.713655 0.374603  
25 1 0 9.487902 -18.875227 0.603892  
26 6 0 8.088134 -17.440025 0.368560  
27 1 0 8.656325 -16.712142 0.584787  
28 6 0 5.326380 -15.453311 1.062831  
29 6 0 4.937403 -16.335818 2.134892  
30 1 0 5.233836 -17.228546 2.268716  
31 8 0 -3.996007 -0.067749 0.934131  
32 6 0 -6.714891 0.277408 0.986180  
33 1 0 -6.306461 -0.263951 1.653331  
34 6 0 -8.065145 0.476760 0.995371  
35 1 0 -8.597878 0.082195 1.673547  
36 6 0 -10.898974 0.844148 -0.977133  
37 6 0 -10.339084 -0.030598 -1.977523  
38 1 0 -9.425285 -0.274344 -2.068646  
39 6 0 -20.609693 1.857542 0.283761  
40 1 0 -21.205177 1.150526 0.508488  
41 6 0 -19.261302 1.645751 0.283456  
42 1 0 -18.916034 0.789195 0.499121

43 6 0 -16.163159 3.042373 0.995695  
44 6 0 -16.737934 3.817772 2.067062  
45 1 0 -17.659891 4.007079 2.197077  
46 6 0 -0.601219 14.839836 -5.032916  
47 1 0 0.146674 15.425411 -4.980616  
48 6 0 -1.335459 14.562261 -3.916288  
49 1 0 -1.105775 14.960685 -3.086884  
50 6 0 -3.105393 12.107298 -2.214282  
51 6 0 -2.224974 11.088357 -2.730090  
52 1 0 -1.641751 11.168959 -3.475812  
53 6 0 -7.842371 11.118226 6.358794  
54 1 0 -7.419652 10.997310 7.202397  
55 6 0 -7.096466 11.400431 5.251093  
56 1 0 -6.152964 11.467687 5.319561  
57 6 0 -6.980658 13.198809 2.283140  
58 6 0 -7.767919 14.254728 2.870244  
59 1 0 -8.300094 14.194388 3.655033  
60 6 0 -5.852013 -12.270442 6.366661  
61 1 0 -5.962466 -11.841571 7.208591  
62 6 0 -6.464341 -11.768637 5.254789  
63 1 0 -6.994635 -10.984983 5.318695  
64 6 0 -8.066257 -12.575734 2.281779  
65 6 0 -8.589742 -13.783856 2.869862  
66 1 0 -8.274955 -14.212393 3.657270  
67 6 0 -12.643969 -7.891733 -5.068021  
68 1 0 -13.525261 -7.536686 -5.020688  
69 6 0 -12.041522 -8.385727 -3.947290  
70 1 0 -12.505156 -8.383738 -3.119974  
71 6 0 -9.038227 -8.686343 -2.230847  
72 6 0 -8.593665 -7.415836 -2.748163  
73 1 0 -8.951700 -6.953114 -3.496791  
74 6 0 13.407895 1.147605 6.424550  
75 1 0 13.087900 0.839841 7.265895  
76 6 0 13.284503 0.363340 5.314271  
77 1 0 12.870692 -0.487556 5.378658  
78 6 0 14.797833 -0.628727 2.350877  
79 6 0 16.103182 -0.476281 2.944377  
80 1 0 16.313354 0.012775 3.731396  
81 6 0 13.063428 -6.955320 -4.989463  
82 1 0 13.196369 -7.895931 -4.938928  
83 6 0 13.184955 -6.183495 -3.870298  
84 1 0 13.411301 -6.583720 -3.040842  
85 6 0 11.935974 -3.427683 -2.166970  
86 6 0 10.615713 -3.679146 -2.689742

87 1 0 10.397376 -4.222706 -3.437817  
88 6 0 4.746194 14.050320 -5.016500  
89 1 0 4.199134 14.827087 -4.968175  
90 6 0 5.362167 13.573394 -3.895727  
91 1 0 5.252444 14.021930 -3.067364  
92 6 0 6.336872 10.713201 -2.185296  
93 6 0 5.202673 9.991707 -2.707289  
94 1 0 4.672119 10.236752 -3.456429  
95 6 0 10.534306 8.405012 6.415208  
96 1 0 10.089620 8.412163 7.256149  
97 6 0 9.908450 8.889749 5.303297  
98 1 0 9.024247 9.226856 5.366154  
99 6 0 10.335127 10.642230 2.336297  
100 6 0 11.390401 11.426108 2.929057  
101 1 0 11.877707 11.215249 3.716976  
102 6 0 9.705983 -11.191578 -4.999410  
103 1 0 10.651977 -11.106320 -4.946466  
104 6 0 8.979761 -11.489403 -3.882756  
105 1 0 9.419208 -11.620748 -3.052669  
106 6 0 6.007474 -10.907758 -2.184659  
107 6 0 5.952159 -9.563446 -2.703509  
108 1 0 6.433129 -9.224599 -3.449563  
109 6 0 1.869851 -13.410533 6.390367  
110 1 0 2.094469 -13.031131 7.233324  
111 6 0 2.607737 -13.108079 5.282639  
112 1 0 3.341476 -12.511052 5.350425  
113 6 0 3.925898 -14.346309 2.318593  
114 6 0 4.074373 -15.653642 2.908740  
115 1 0 3.644451 -15.972226 3.693862  
116 6 0 -14.633936 -2.865958 -5.074491  
117 1 0 -15.033330 -3.727974 -5.025590  
118 6 0 -14.533954 -2.090952 -3.955391  
119 1 0 -14.871282 -2.407954 -3.127667  
120 6 0 -12.552038 0.187985 -2.242270  
121 6 0 -11.357764 -0.434950 -2.757148  
122 1 0 -11.301322 -1.019014 -3.504430  
123 6 0 -12.690647 5.000908 6.344430  
124 1 0 -12.478306 4.614548 7.187409  
125 6 0 -12.792493 4.213464 5.234218  
126 1 0 -12.642630 3.279345 5.300335  
127 6 0 -14.510094 3.698535 2.260832  
128 6 0 -15.719253 4.222125 2.846687  
129 1 0 -15.783853 4.751749 3.632861  
130 8 0 -0.909463 3.826701 0.943275

131 6 0 -1.866615 6.394725 1.000544  
132 1 0 -1.247805 6.118811 1.668318  
133 6 0 -2.369120 7.663727 1.012247  
134 1 0 -2.108212 8.270538 1.692773  
135 6 0 -3.369538 10.344421 -0.954825  
136 6 0 -2.387749 10.002006 -1.953966  
137 1 0 -1.941526 9.168296 -2.046473  
138 6 0 -6.716512 14.961686 1.023682  
139 6 0 -7.605142 15.341079 2.094119  
140 1 0 -8.000319 16.195052 2.225695  
141 6 0 -13.771059 -15.413809 0.305991  
142 1 0 -14.689336 -15.305593 0.529670  
143 6 0 -12.933150 -14.336349 0.304026  
144 1 0 -13.268039 -13.475132 0.517481  
145 6 0 -9.719321 -13.231896 1.016642  
146 6 0 -9.608421 -14.188208 2.090238  
147 1 0 -10.150993 -14.957062 2.221486  
148 8 0 -2.979261 -2.635599 0.937436  
149 6 0 -4.724923 -4.748367 0.992648  
150 1 0 -4.798392 -4.072663 1.658233  
151 6 0 -5.572714 -5.818015 1.003473  
152 1 0 -6.231752 -5.893588 1.681239  
153 6 0 -7.385162 -8.030180 -0.965710  
154 6 0 -7.574986 -7.011484 -1.968537  
155 1 0 -7.075662 -6.208445 -2.061007  
156 6 0 20.116936 -4.155517 0.408786  
157 1 0 20.481333 -5.004255 0.636462  
158 6 0 18.764899 -3.968605 0.400192  
159 1 0 18.185540 -4.688645 0.613018  
160 6 0 16.198325 -1.735633 1.095050  
161 6 0 16.966211 -1.158457 2.170530  
162 1 0 17.902739 -1.243545 2.306249  
163 8 0 3.652127 -1.196954 0.957610  
164 6 0 6.354386 -1.652198 1.026300  
165 1 0 5.802935 -2.051836 1.690505  
166 6 0 7.704559 -1.851548 1.043783  
167 1 0 8.096452 -2.382630 1.724797  
168 6 0 10.535423 -2.320644 -0.911315  
169 6 0 9.752678 -2.997023 -1.915852  
170 1 0 8.807991 -2.966385 -2.012671  
171 6 0 -4.898270 -14.054363 5.059931  
172 1 0 -4.351211 -14.831131 5.011607  
173 6 0 -5.514245 -13.577436 3.939158  
174 1 0 -5.404521 -14.025973 3.110795

175 6 0 -6.488949 -10.717243 2.228727  
176 6 0 -5.354750 -9.995749 2.750719  
177 1 0 -4.824196 -10.240794 3.499859  
178 6 0 -10.686383 -8.409054 -6.371777  
179 1 0 -10.241697 -8.416206 -7.212717  
180 6 0 -10.060528 -8.893792 -5.259865  
181 1 0 -9.176324 -9.230900 -5.322723  
182 6 0 -10.487204 -10.646272 -2.292866  
183 6 0 -11.542479 -11.430151 -2.885626  
184 1 0 -12.029784 -11.219291 -3.673545  
185 6 0 -9.858060 11.187536 5.042841  
186 1 0 -10.804054 11.102277 4.989897  
187 6 0 -9.131837 11.485360 3.926187  
188 1 0 -9.571285 11.616706 3.096101  
189 6 0 -6.159552 10.903715 2.228090  
190 6 0 -6.104236 9.559403 2.746940  
191 1 0 -6.585205 9.220557 3.492993  
192 6 0 -2.021928 13.406490 -6.346935  
193 1 0 -2.246546 13.027089 -7.189894  
194 6 0 -2.759814 13.104035 -5.239208  
195 1 0 -3.493553 12.507009 -5.306994  
196 6 0 -4.077975 14.342266 -2.275163  
197 6 0 -4.226450 15.649599 -2.865309  
198 1 0 -3.796528 15.968183 -3.650430  
199 6 0 14.481859 2.861916 5.117922  
200 1 0 14.881253 3.723930 5.069021  
201 6 0 14.381877 2.086909 3.998823  
202 1 0 14.719205 2.403912 3.171098  
203 6 0 12.399954 -0.192090 2.285748  
204 6 0 11.205687 0.430908 2.800579  
205 1 0 11.149245 1.014970 3.547861  
206 6 0 12.538569 -5.004951 -6.300999  
207 1 0 12.326229 -4.618591 -7.143978  
208 6 0 12.640415 -4.217506 -5.190787  
209 1 0 12.490553 -3.283388 -5.256903  
210 6 0 14.358012 -3.702604 -2.217384  
211 6 0 15.567176 -4.226167 -2.803255  
212 1 0 15.631776 -4.755791 -3.589430  
213 8 0 0.757386 -3.830743 -0.899844  
214 6 0 1.714537 -6.398767 -0.957112  
215 1 0 1.095728 -6.122853 -1.624887  
216 6 0 2.217043 -7.667770 -0.968816  
217 1 0 1.956135 -8.274580 -1.649343  
218 6 0 3.217461 -10.348463 0.998257

219 6 0 2.235672 -10.006048 1.997397  
220 1 0 1.789449 -9.172338 2.089904  
221 6 0 6.424898 -19.567379 -0.281904  
222 1 0 5.873096 -20.307953 -0.510031  
223 6 0 5.910729 -18.303007 -0.279127  
224 1 0 4.998450 -18.161878 -0.496473  
225 6 0 6.564435 -14.965730 -0.980251  
226 6 0 7.453065 -15.345122 -2.050688  
227 1 0 7.848242 -16.199094 -2.182263  
228 6 0 13.618982 15.409766 -0.262560  
229 1 0 14.537259 15.301551 -0.486239  
230 6 0 12.781072 14.332307 -0.260596  
231 1 0 13.115961 13.471089 -0.474050  
232 6 0 9.567244 13.227854 -0.973211  
233 6 0 9.456345 14.184165 -2.046806  
234 1 0 9.998915 14.953019 -2.178055  
235 8 0 2.827184 2.631557 -0.894005  
236 6 0 4.572845 4.744324 -0.949217  
237 1 0 4.646315 4.068620 -1.614802  
238 6 0 5.420637 5.813972 -0.960043  
239 1 0 6.079675 5.889546 -1.637808  
240 6 0 7.233085 8.026137 1.009142  
241 6 0 7.422909 7.007441 2.011969  
242 1 0 6.923585 6.204403 2.104438  
243 6 0 -20.269013 4.151475 -0.365356  
244 1 0 -20.633411 5.000212 -0.593030  
245 6 0 -18.916976 3.964563 -0.356761  
246 1 0 -18.337617 4.684603 -0.569588  
247 6 0 -16.350405 1.731578 -1.051610  
248 6 0 -17.118288 1.154415 -2.127099  
249 1 0 -18.054816 1.239502 -2.262818  
250 8 0 -3.804204 1.192911 -0.914178  
251 6 0 -6.506463 1.648155 -0.982869  
252 1 0 -5.955012 2.047793 -1.647074  
253 6 0 -7.856636 1.847505 -1.000351  
254 1 0 -8.248529 2.378588 -1.681365  
255 6 0 -10.687522 2.316482 0.954763  
256 6 0 -9.904754 2.992992 1.959275  
257 1 0 -8.960068 2.962342 2.056102  
258 8 0 -1.974799 -3.427351 -0.908232  
259 6 0 -3.632875 -5.609252 -0.973528  
260 1 0 -2.956732 -5.524531 -1.637327  
261 6 0 -4.480584 -6.678902 -0.989377  
262 1 0 -4.402084 -7.335824 -1.668861

263 6 0 -6.224803 -8.954366 0.969271  
264 6 0 -5.191973 -8.909397 1.974595  
265 1 0 -4.524422 -8.240131 2.070522  
266 6 0 -11.951778 -16.854165 -0.338319  
267 1 0 -11.636176 -17.722806 -0.563782  
268 6 0 -11.094188 -15.792326 -0.331330  
269 1 0 -10.178760 -15.921047 -0.543066  
270 6 0 -10.751349 -12.409149 -1.033409  
271 6 0 -11.705255 -12.516503 -2.109502  
272 1 0 -12.329559 -13.219955 -2.244207  
273 8 0 -2.088764 3.357370 -0.909096  
274 6 0 -3.149018 5.884414 -0.972922  
275 1 0 -3.410621 5.258182 -1.639536  
276 6 0 -3.651442 7.153414 -0.987892  
277 1 0 -4.256436 7.415615 -1.669538  
278 6 0 -4.759070 9.796713 0.972327  
279 6 0 -5.241206 8.877227 1.973092  
280 1 0 -4.995820 7.964236 2.067847  
281 6 0 -5.287424 15.525125 -0.850972  
282 6 0 -5.089480 16.331776 -2.091460  
283 1 0 -5.385913 17.224503 -2.225285  
284 8 0 3.843930 0.063707 -0.890700  
285 6 0 6.562814 -0.281451 -0.942748  
286 1 0 6.154383 0.259908 -1.609900  
287 6 0 7.913069 -0.480804 -0.951940  
288 1 0 8.445801 -0.086238 -1.630115  
289 6 0 10.746885 -0.848254 1.020608  
290 6 0 10.187007 0.026556 2.020954  
291 1 0 9.273207 0.270301 2.112076  
292 6 0 20.457615 -1.861585 -0.240330  
293 1 0 21.053100 -1.154568 -0.465058  
294 6 0 19.109225 -1.649794 -0.240024  
295 1 0 18.763957 -0.793238 -0.455690  
296 6 0 16.011080 -3.046421 -0.952260  
297 6 0 16.585857 -3.821815 -2.023631  
298 1 0 17.507814 -4.011122 -2.153645  
299 6 0 0.449142 -14.843878 5.076347  
300 1 0 -0.298751 -15.429453 5.024048  
301 6 0 1.183382 -14.566304 3.959720  
302 1 0 0.953698 -14.964728 3.130315  
303 6 0 2.953316 -12.111341 2.257713  
304 6 0 2.072897 -11.092400 2.773521  
305 1 0 1.489673 -11.173002 3.519242  
306 6 0 7.690294 -11.122268 -6.315363



307 1 0 7.267575 -11.001353 -7.158966  
308 6 0 6.944389 -11.404473 -5.207663  
309 1 0 6.000887 -11.471730 -5.276130  
310 6 0 6.828581 -13.202851 -2.239708  
311 6 0 7.615842 -14.258771 -2.826812  
312 1 0 8.148017 -14.198431 -3.611602  
313 6 0 5.699936 12.266400 -6.323230  
314 1 0 5.810389 11.837527 -7.165160  
315 6 0 6.312264 11.764593 -5.211357  
316 1 0 6.842558 10.980940 -5.275263  
317 6 0 7.914180 12.571690 -2.238348  
318 6 0 8.437665 13.779813 -2.826432  
319 1 0 8.122877 14.208350 -3.613839  
320 6 0 12.491892 7.887691 5.111453  
321 1 0 13.373184 7.532642 5.064118  
322 6 0 11.889445 8.381685 3.990720  
323 1 0 12.353079 8.379695 3.163406  
324 6 0 8.886150 8.682301 2.274278  
325 6 0 8.441588 7.411794 2.791594  
326 1 0 8.799623 6.949072 3.540223  
327 6 0 -13.559971 -1.151647 -6.381119  
328 1 0 -13.239977 -0.843883 -7.222464  
329 6 0 -13.436580 -0.367384 -5.270840  
330 1 0 -13.022769 0.483512 -5.335227  
331 6 0 -14.949923 0.624575 -2.307373  
332 6 0 -16.255258 0.472238 -2.900947  
333 1 0 -16.465431 -0.016817 -3.687965  
334 6 0 -13.215505 6.951277 5.032894  
335 1 0 -13.348446 7.891889 4.982359  
336 6 0 -13.337033 6.179452 3.913729  
337 1 0 -13.563378 6.579677 3.084273  
338 6 0 -12.088004 3.423484 2.210526  
339 6 0 -10.767783 3.675169 2.733123  
340 1 0 -10.549453 4.218663 3.481248  
341 40 0 0.217298 2.014125 1.433972  
342 8 0 0.221940 1.998120 -0.847770  
343 40 0 1.516749 -1.267711 1.438196  
344 8 0 1.511186 -1.257944 -0.843579  
345 40 0 -1.975115 -0.752156 1.427476  
346 8 0 -1.953258 -0.746439 -0.854213  
347 40 0 -0.369375 -2.018167 -1.390541  
348 8 0 -0.374017 -2.002162 0.891201  
349 40 0 1.823039 0.748114 -1.384045  
350 8 0 1.801180 0.742395 0.897645

351 40 0 -1.668826 1.263668 -1.394765  
352 8 0 -1.663264 1.253901 0.887010  
353 29 0 8.368081 10.652356 0.046733  
354 29 0 4.928818 -12.642064 0.037985  
355 29 0 -13.525014 1.983645 -0.019571  
356 29 0 -5.080894 12.638022 0.005446  
357 29 0 -8.520158 -10.656398 -0.003302  
358 29 0 13.372780 -1.987819 0.063354  
359 8 0 -0.082688 -0.001856 2.195602  
360 8 0 -0.069389 -0.002186 -2.152172  
361 7 0 6.852541 10.056647 -1.104942  
362 7 0 9.873741 11.255875 1.207268  
363 7 0 5.176030 -11.028799 -1.108467  
364 7 0 4.693268 -14.250700 1.193363  
365 7 0 -12.246161 0.965827 -1.162667  
366 7 0 -14.805733 2.989025 1.132411  
367 7 0 -3.795277 11.628738 -1.137630  
368 7 0 -6.354849 13.651936 1.157449  
369 7 0 -8.766480 -12.263443 1.152043  
370 7 0 -8.283718 -9.041542 -1.149786  
371 7 0 14.882747 -1.394155 1.223296  
372 7 0 11.861370 -2.593377 -1.088809  
373 7 0 -7.004618 -10.060690 1.148373  
374 7 0 -10.025818 -11.259918 -1.163837  
375 7 0 -5.328107 11.024757 1.151898  
376 7 0 -4.845345 14.246658 -1.149932  
377 7 0 12.094114 -0.969666 1.205951  
378 7 0 14.653678 -2.993011 -1.089005  
379 7 0 3.643199 -11.632781 1.181061  
380 7 0 6.202771 -13.655979 -1.114018  
381 7 0 8.614403 12.259400 -1.108612  
382 7 0 8.131641 9.037499 1.193217  
383 7 0 -15.034683 1.390251 -1.180120  
384 7 0 -12.013483 2.589479 1.132091  
385 6 0 2.689273 3.487112 0.029908  
386 6 0 3.613356 4.653076 0.032646  
387 6 0 5.318782 6.804899 0.037699  
388 6 0 6.236804 7.963214 0.040419  
389 6 0 13.122808 16.651635 0.060819  
390 6 0 11.417381 14.499812 0.055767  
391 6 0 10.499359 13.341496 0.053047  
392 6 0 1.562970 -4.141428 0.027044  
393 6 0 2.110677 -5.524693 0.028824  
394 6 0 3.121488 -8.077553 0.032110

395 6 0 3.665603 -9.451746 0.033879  
396 6 0 7.746958 -19.759435 0.047146  
397 6 0 6.736147 -17.206575 0.043860  
398 6 0 6.192032 -15.832383 0.042092  
399 6 0 -4.480358 0.648252 0.008194  
400 6 0 -5.952149 0.865554 0.003676  
401 6 0 -8.668385 1.266591 -0.004662  
402 6 0 -10.130523 1.482468 -0.009150  
403 6 0 -21.097881 3.101737 -0.042819  
404 6 0 -18.381644 2.700700 -0.034481  
405 6 0 -16.919507 2.484823 -0.029992  
406 6 0 -0.952580 14.264609 -6.232358  
407 6 0 -2.433324 13.681184 -3.994982  
408 6 0 -3.230402 13.367130 -2.790612  
409 6 0 -9.209209 11.011435 6.243250  
410 6 0 -7.728465 11.594859 4.005874  
411 6 0 -6.931387 11.908914 2.801504  
412 6 0 -5.075607 -13.401076 6.257751  
413 6 0 -6.311100 -12.416614 4.012035  
414 6 0 -6.976159 -11.886684 2.803177  
415 6 0 -11.964711 -7.911719 -6.264354  
416 6 0 -10.729218 -8.896181 -4.018639  
417 6 0 -10.064159 -9.426112 -2.809781  
418 6 0 13.999349 2.385005 6.314894  
419 6 0 13.774668 0.816607 4.072464  
420 6 0 13.653722 -0.027655 2.865376  
421 6 0 12.746527 -6.360380 -6.188888  
422 6 0 12.971208 -4.791982 -3.946459  
423 6 0 13.092155 -3.947693 -2.739391  
424 6 0 4.923530 13.397034 -6.214320  
425 6 0 6.159023 12.412572 -3.968604  
426 6 0 6.824082 11.882641 -2.759746  
427 6 0 11.812633 7.907677 6.307786  
428 6 0 10.577141 8.892139 4.062070  
429 6 0 9.912082 9.422069 2.853212  
430 6 0 9.057132 -11.015477 -6.199819  
431 6 0 7.576388 -11.598902 -3.962443  
432 6 0 6.779310 -11.912956 -2.758073  
433 6 0 0.800503 -14.268652 6.275790  
434 6 0 2.281247 -13.685227 4.038412  
435 6 0 3.078325 -13.371173 2.834044  
436 6 0 -14.151426 -2.389047 -6.271462  
437 6 0 -13.926745 -0.820649 -4.029033  
438 6 0 -13.805800 0.023611 -2.821944

439 6 0 -12.898604 6.356338 6.232320  
440 6 0 -13.123285 4.787940 3.989890  
441 6 0 -13.244230 3.943678 2.782802  
442 6 0 -1.715047 4.137386 0.016387  
443 6 0 -2.262754 5.520651 0.014607  
444 6 0 -3.273565 8.073511 0.011321  
445 6 0 -3.817680 9.447703 0.009552  
446 6 0 -6.344109 15.828341 0.001340  
447 6 0 -13.274885 -16.655677 -0.017389  
448 6 0 -11.569459 -14.503855 -0.012336  
449 6 0 -10.651437 -13.345539 -0.009616  
450 6 0 -2.841350 -3.491155 0.013523  
451 6 0 -3.765433 -4.657118 0.010785  
452 6 0 -5.470859 -6.808941 0.005732  
453 6 0 -6.388881 -7.967257 0.003013  
454 6 0 20.945804 -3.105779 0.086250  
455 6 0 18.229567 -2.704742 0.077912  
456 6 0 16.767429 -2.488866 0.073423  
457 6 0 4.328281 -0.652294 0.035236  
458 6 0 5.800072 -0.869596 0.039755  
459 6 0 8.516309 -1.270634 0.048093  
460 6 0 9.978450 -1.486471 0.052549  
461 1 0 22.004324 -3.262064 0.089500  
462 1 0 14.069275 2.915561 7.101037  
463 1 0 12.658968 -6.971587 -7.062766  
464 1 0 4.495605 13.738013 -6.992146  
465 1 0 13.713499 17.396941 0.062569  
466 1 0 12.226119 7.570554 7.095045  
467 1 0 -0.439708 14.466685 -7.007297  
468 6 0 -6.911051 17.260184 -0.000503  
469 6 0 -6.175862 18.302221 0.565293  
470 6 0 -8.159455 17.515338 -0.567893  
471 6 0 -6.689338 19.598972 0.564258  
472 1 0 -5.324748 18.127802 0.952789  
473 6 0 -8.672795 18.812599 -0.569889  
474 1 0 -8.660796 16.804945 -0.953860  
475 6 0 -7.938049 19.854355 -0.003823  
476 1 0 -6.188334 20.309444 0.950519  
477 1 0 -9.524098 18.986422 -0.957238  
478 1 0 -8.288079 20.738917 -0.004473  
479 1 0 -9.722081 10.809359 7.018189  
480 1 0 -12.820783 6.899569 7.009008  
481 1 0 -22.038678 3.240640 -0.045707  
482 1 0 -14.229246 -2.932278 -7.048151

483 1 0 -12.392636 -7.570740 -7.042181  
 484 1 0 -13.865576 -17.400984 -0.019139  
 485 1 0 -4.647682 -13.742055 7.035577  
 486 1 0 0.287631 -14.470727 7.050728  
 487 1 0 8.097062 -20.643645 0.048284  
 488 1 0 9.570004 -10.813402 -6.974758  
 489 6 0 11.113969 0.482086 -2.774368  
 490 1 0 10.936915 1.541681 -2.981486  
 491 1 0 11.015183 0.276665 -1.699609  
 492 1 0 12.098775 0.173206 -3.141520  
 493 8 0 10.101782 -0.192037 -3.498187  
 494 1 0 10.146745 -1.158502 -3.296909

CH<sub>3</sub>--Zr<sub>6</sub>O<sub>8</sub> (TCPP-Cu)<sub>6</sub>

-----  
 Center Atomic Atomic Coordinates (Angstroms)

Number Number Type X Y Z

-----

|    |   |   |           |           |           |
|----|---|---|-----------|-----------|-----------|
| 1  | 8 | 0 | -2.042959 | 3.346631  | 0.936685  |
| 2  | 6 | 0 | -3.129125 | 5.862757  | 0.996138  |
| 3  | 1 | 0 | -3.386229 | 5.234222  | 1.662335  |
| 4  | 6 | 0 | -3.644513 | 7.126570  | 1.008998  |
| 5  | 1 | 0 | -4.254099 | 7.382925  | 1.688774  |
| 6  | 6 | 0 | -4.773447 | 9.757440  | -0.955783 |
| 7  | 6 | 0 | -5.243308 | 8.832578  | -1.957430 |
| 8  | 1 | 0 | -4.988347 | 7.922092  | -2.050999 |
| 9  | 6 | 0 | -8.839805 | 18.629991 | 0.331625  |
| 10 | 1 | 0 | -9.751068 | 18.782393 | 0.558230  |
| 11 | 6 | 0 | -8.336060 | 17.361432 | 0.327661  |
| 12 | 1 | 0 | -8.897411 | 16.627898 | 0.542651  |
| 13 | 6 | 0 | -5.556173 | 15.403359 | 1.030873  |
| 14 | 6 | 0 | -5.179291 | 16.290329 | 2.103571  |
| 15 | 1 | 0 | -5.485201 | 17.180053 | 2.236072  |
| 16 | 8 | 0 | 3.923065  | 0.113683  | 0.936983  |
| 17 | 6 | 0 | 6.645170  | -0.203680 | 0.996980  |
| 18 | 1 | 0 | 6.229328  | 0.333818  | 1.662674  |
| 19 | 6 | 0 | 7.997357  | -0.389237 | 1.010133  |
| 20 | 1 | 0 | 8.524093  | 0.011088  | 1.689618  |
| 21 | 6 | 0 | 10.840417 | -0.728673 | -0.954074 |
| 22 | 6 | 0 | 10.274495 | 0.139810  | -1.956525 |
| 23 | 1 | 0 | 9.358520  | 0.374170  | -2.050385 |
| 24 | 6 | 0 | 20.557326 | -1.642270 | 0.335084  |
| 25 | 1 | 0 | 21.144918 | -0.929100 | 0.561136  |
| 26 | 6 | 0 | 19.206849 | -1.444252 | 0.330816  |

27 1 0 18.852244 -0.591156 0.545039  
28 6 0 16.121095 -2.872064 1.034948  
29 6 0 16.700687 -3.641016 2.108364  
30 1 0 17.624151 -3.820839 2.241112  
31 8 0 -1.859763 -3.436570 0.939757  
32 6 0 -3.495666 -5.635247 1.001479  
33 1 0 -2.822325 -5.543297 1.667161  
34 6 0 -4.332457 -6.713486 1.015475  
35 1 0 -4.249202 -7.369231 1.695531  
36 6 0 -6.047753 -9.007618 -0.946933  
37 6 0 -5.012564 -8.952617 -1.949328  
38 1 0 -4.351605 -8.276620 -2.043704  
39 6 0 -11.697533 -16.964799 0.348500  
40 1 0 -11.373727 -17.830060 0.575326  
41 6 0 -10.850807 -15.894265 0.343396  
42 1 0 -9.934721 -16.013531 0.557812  
43 6 0 -10.544520 -12.507416 1.044649  
44 6 0 -11.500355 -12.623956 2.118072  
45 1 0 -12.117831 -13.333675 2.251368  
46 6 0 -13.188751 6.823801 -5.038967  
47 1 0 -13.331427 7.763032 -4.989313  
48 6 0 -13.305597 6.051339 -3.919743  
49 1 0 -13.538386 6.449651 -3.091151  
50 6 0 -12.033388 3.309119 -2.211513  
51 6 0 -10.714313 3.574002 -2.730472  
52 1 0 -10.499402 4.119320 -3.478261  
53 6 0 -13.483164 -1.276475 6.378326  
54 1 0 -13.168735 -0.965037 7.220417  
55 6 0 -13.364606 -0.491550 5.267986  
56 1 0 -12.959687 0.363557 5.333101  
57 6 0 -14.879509 0.483419 2.299683  
58 6 0 -16.184915 0.318067 2.889607  
59 1 0 -16.392336 -0.172713 3.676282  
60 6 0 7.867844 -11.029722 6.378560  
61 1 0 7.441503 -10.912702 7.220888  
62 6 0 7.128031 -11.320081 5.268884  
63 1 0 6.185072 -11.396930 5.334694  
64 6 0 7.039072 -13.121040 2.301569  
65 6 0 7.835385 -14.168575 2.891481  
66 1 0 8.364669 -14.102412 3.677755  
67 6 0 0.697669 -14.830773 -5.031799  
68 1 0 -0.044355 -15.423924 -4.981325  
69 6 0 1.425841 -14.545156 -3.913228  
70 1 0 1.197863 -14.945487 -3.084270

71 6 0 3.165752 -12.071403 -2.207480  
72 6 0 2.276460 -11.061759 -2.726343  
73 1 0 1.696227 -11.148684 -3.473683  
74 6 0 5.638897 12.337415 6.368297  
75 1 0 5.751312 11.910117 7.210767  
76 6 0 6.259494 11.841327 5.258445  
77 1 0 6.797572 11.063156 5.324283  
78 6 0 7.861590 12.663236 2.289593  
79 6 0 8.371032 13.876933 2.878526  
80 1 0 8.049638 14.302630 3.664804  
81 6 0 12.507871 8.022505 -5.044611  
82 1 0 13.392603 7.676493 -4.994572  
83 6 0 11.897211 8.510887 -3.925867  
84 1 0 12.358471 8.514045 -3.097231  
85 6 0 8.886104 8.781699 -2.218169  
86 6 0 8.456014 7.506459 -2.736076  
87 1 0 8.820892 7.047040 -3.483433  
88 6 0 -9.874696 11.094101 -5.041581  
89 1 0 -10.819918 10.999217 -4.991293  
90 6 0 -9.154748 11.399884 -3.923016  
91 1 0 -9.597887 11.527154 -3.094258  
92 6 0 -6.181553 10.849458 -2.216129  
93 6 0 -6.111036 9.505521 -2.734103  
94 1 0 -6.586387 9.161407 -3.481347  
95 6 0 -2.094235 13.398646 6.369344  
96 1 0 -2.317379 13.017396 7.211860  
97 6 0 -2.825824 13.088119 5.259676  
98 1 0 -3.553623 12.483669 5.325684  
99 6 0 -4.148066 14.311341 2.291219  
100 6 0 -4.311562 15.617386 2.880243  
101 1 0 -3.887161 15.940737 3.666420  
102 6 0 14.549032 3.017297 -5.042723  
103 1 0 14.939468 3.883369 -4.993141  
104 6 0 14.453763 2.241875 -3.923501  
105 1 0 14.785469 2.562720 -3.094985  
106 6 0 12.490313 -0.056309 -2.214835  
107 6 0 11.291222 0.554145 -2.733453  
108 1 0 11.230961 1.137226 -3.481203  
109 6 0 12.653463 -4.863248 6.374787  
110 1 0 12.434779 -4.478650 7.216950  
111 6 0 12.750444 -4.075363 5.264450  
112 1 0 12.590867 -3.142789 5.329642  
113 6 0 14.471199 -3.544428 2.295708  
114 6 0 15.683959 -4.055353 2.885292

115 1 0 15.751709 -4.583894 3.671929  
116 6 0 -4.657547 -14.095867 -5.031075  
117 1 0 -4.102729 -14.866986 -4.980775  
118 6 0 -5.281560 -13.624688 -3.912319  
119 1 0 -5.169634 -14.071665 -3.083408  
120 6 0 -6.290291 -10.773733 -2.206200  
121 6 0 -5.162024 -10.040963 -2.725336  
122 1 0 -4.626857 -10.280958 -3.472828  
123 6 0 -10.535650 -8.504179 6.381052  
124 1 0 -10.093322 -8.506368 7.223262  
125 6 0 -9.901701 -8.983063 5.271191  
126 1 0 -9.014289 -9.311097 5.336752  
127 6 0 -10.301982 -10.741299 2.303918  
128 6 0 -11.350894 -11.535609 2.894079  
129 1 0 -11.842579 -11.329336 3.680491  
130 8 0 -3.736230 1.164782 0.938020  
131 6 0 -6.443180 1.592455 0.998752  
132 1 0 -5.897737 1.998035 1.664316  
133 6 0 -7.795361 1.778026 1.012272  
134 1 0 -8.194601 2.305422 1.691881  
135 6 0 -10.625281 2.217101 -0.951168  
136 6 0 -9.846585 2.901059 -1.953800  
137 1 0 -8.901363 2.880005 -2.047913  
138 6 0 -16.287615 1.575440 1.039336  
139 6 0 -17.052643 0.991010 2.112935  
140 1 0 -17.990375 1.066603 2.245934  
141 6 0 6.705962 -19.490340 0.346008  
142 1 0 6.161095 -20.236392 0.572952  
143 6 0 6.178928 -18.231284 0.341089  
144 1 0 5.264638 -18.099364 0.555754  
145 6 0 6.796534 -14.887155 1.042301  
146 6 0 7.685925 -15.256921 2.115473  
147 1 0 8.089416 -16.106749 2.248631  
148 8 0 0.876410 -3.812061 0.939386  
149 6 0 1.859551 -6.370154 1.000753  
150 1 0 1.236051 -6.100233 1.666612  
151 6 0 2.374945 -7.633954 1.014567  
152 1 0 2.118296 -8.243052 1.694670  
153 6 0 3.408290 -10.305286 -0.948213  
154 6 0 2.425921 -9.973413 -1.950335  
155 1 0 1.971479 -9.144347 -2.044560  
156 6 0 13.542760 15.558393 0.328594  
157 1 0 14.461451 15.459668 0.554952  
158 6 0 12.715899 14.472437 0.324811



159 1 0 13.058947 13.614790 0.539678  
160 6 0 9.511484 13.335598 1.028833  
161 6 0 9.387761 14.291269 2.101599  
162 1 0 9.922079 15.065686 2.233986  
163 8 0 2.880162 2.671024 0.936018  
164 6 0 4.604007 4.801526 0.995091  
165 1 0 4.682463 4.126941 1.661243  
166 6 0 5.440804 5.879776 1.007768  
167 1 0 6.097096 5.962413 1.687372  
168 6 0 7.236210 8.109335 -0.957409  
169 6 0 7.439288 7.092124 -1.959148  
170 1 0 6.948452 6.283984 -2.052615  
171 6 0 9.887893 -11.079117 5.068406  
172 1 0 10.833115 -10.984235 5.018119  
173 6 0 9.167945 -11.384900 3.949842  
174 1 0 9.611082 -11.512170 3.121083  
175 6 0 6.194748 -10.834475 2.242954  
176 6 0 6.124232 -9.490537 2.760928  
177 1 0 6.599583 -9.146424 3.508171  
178 6 0 2.107432 -13.383662 -6.342519  
179 1 0 2.330575 -13.002413 -7.185034  
180 6 0 2.839019 -13.073135 -5.232850  
181 1 0 3.566820 -12.468686 -5.298859  
182 6 0 4.161262 -14.296356 -2.264394  
183 6 0 4.324757 -15.602403 -2.853418  
184 1 0 3.900357 -15.925754 -3.639594  
185 6 0 -14.535836 -3.002315 5.069548  
186 1 0 -14.926271 -3.868386 5.019966  
187 6 0 -14.440566 -2.226891 3.950327  
188 1 0 -14.772273 -2.547736 3.121811  
189 6 0 -12.477117 0.071292 2.241660  
190 6 0 -11.278026 -0.539162 2.760278  
191 1 0 -11.217766 -1.122243 3.508028  
192 6 0 -12.640267 4.878232 -6.347962  
193 1 0 -12.421584 4.493635 -7.190126  
194 6 0 -12.737247 4.090348 -5.237625  
195 1 0 -12.577671 3.157772 -5.302817  
196 6 0 -14.458005 3.559411 -2.268883  
197 6 0 -15.670764 4.070337 -2.858467  
198 1 0 -15.738514 4.598878 -3.645104  
199 6 0 4.670742 14.110850 5.057900  
200 1 0 4.115926 14.881970 5.007600  
201 6 0 5.294755 13.639672 3.939145  
202 1 0 5.182831 14.086650 3.110233

203 6 0 6.303488 10.788717 2.233026  
204 6 0 5.175220 10.055947 2.752161  
205 1 0 4.640054 10.295941 3.499653  
206 6 0 10.548846 8.519163 -6.354227  
207 1 0 10.106517 8.521352 -7.196437  
208 6 0 9.914898 8.998045 -5.244365  
209 1 0 9.027484 9.326080 -5.309926  
210 6 0 10.315176 10.756281 -2.277092  
211 6 0 11.364090 11.550593 -2.867254  
212 1 0 11.855774 11.344321 -3.653666  
213 8 0 3.749436 -1.149811 -0.911236  
214 6 0 6.456375 -1.577473 -0.971927  
215 1 0 5.910933 -1.983052 -1.637491  
216 6 0 7.808558 -1.763041 -0.985447  
217 1 0 8.207796 -2.290438 -1.665057  
218 6 0 10.638476 -2.202117 0.977993  
219 6 0 9.859781 -2.886076 1.980626  
220 1 0 8.914559 -2.865020 2.074739  
221 6 0 20.241931 -3.939887 -0.313781  
222 1 0 20.615622 -4.784974 -0.539963  
223 6 0 18.888039 -3.766780 -0.309147  
224 1 0 18.316669 -4.492801 -0.523244  
225 6 0 16.300812 -1.560456 -1.012510  
226 6 0 17.065838 -0.976026 -2.086109  
227 1 0 18.003571 -1.051619 -2.219109  
228 6 0 -6.692766 19.505325 -0.319182  
229 1 0 -6.147900 20.251377 -0.546127  
230 6 0 -6.165732 18.246266 -0.314265  
231 1 0 -5.251442 18.114347 -0.528929  
232 6 0 -6.783340 14.902140 -1.015476  
233 6 0 -7.672728 15.271905 -2.088648  
234 1 0 -8.076221 16.121732 -2.221806  
235 8 0 -0.863207 3.827064 -0.912617  
236 6 0 -1.846356 6.385136 -0.973929  
237 1 0 -1.222855 6.115217 -1.639786  
238 6 0 -2.361747 7.648938 -0.987742  
239 1 0 -2.105101 8.258038 -1.667844  
240 6 0 -3.395095 10.320269 0.975038  
241 6 0 -2.412726 9.988396 1.977160  
242 1 0 -1.958283 9.159331 2.071385  
243 6 0 -13.529565 -15.543409 -0.301770  
244 1 0 -14.448254 -15.444685 -0.528127  
245 6 0 -12.702704 -14.457453 -0.297985  
246 1 0 -13.045753 -13.599805 -0.512854

247 6 0 -9.498287 -13.320616 -1.002007  
248 6 0 -9.374565 -14.276284 -2.074773  
249 1 0 -9.908883 -15.050701 -2.207161  
250 8 0 -2.866970 -2.656042 -0.909202  
251 6 0 -4.590812 -4.786543 -0.968265  
252 1 0 -4.669268 -4.111958 -1.634418  
253 6 0 -5.427609 -5.864793 -0.980943  
254 1 0 -6.083900 -5.947430 -1.660547  
255 6 0 -7.223014 -8.094349 0.984234  
256 6 0 -7.426091 -7.077141 1.985973  
257 1 0 -6.935256 -6.269001 2.079440  
258 8 0 2.056139 -3.331641 -0.909811  
259 6 0 3.142321 -5.847773 -0.969313  
260 1 0 3.399425 -5.219238 -1.635510  
261 6 0 3.657709 -7.111586 -0.982173  
262 1 0 4.267295 -7.367941 -1.661948  
263 6 0 4.786642 -9.742456 0.982608  
264 6 0 5.256503 -8.817594 1.984256  
265 1 0 5.001543 -7.907108 2.077824  
266 6 0 8.853002 -18.615006 -0.304800  
267 1 0 9.764265 -18.767409 -0.531405  
268 6 0 8.349255 -17.346449 -0.300835  
269 1 0 8.910606 -16.612914 -0.515827  
270 6 0 5.569368 -15.388375 -1.004048  
271 6 0 5.192486 -16.275346 -2.076746  
272 1 0 5.498397 -17.165071 -2.209247  
273 8 0 -3.909866 -0.098696 -0.910142  
274 6 0 -6.631973 0.218662 -0.970154  
275 1 0 -6.216133 -0.318835 -1.635849  
276 6 0 -7.984161 0.404219 -0.983308  
277 1 0 -8.510897 0.003897 -1.662792  
278 6 0 -10.827223 0.743657 0.980900  
279 6 0 -10.261298 -0.124826 1.983350  
280 1 0 -9.345324 -0.359187 2.077211  
281 6 0 -16.079855 3.091227 -0.840374  
282 6 0 -16.687490 3.656001 -2.081539  
283 1 0 -17.610955 3.835822 -2.214287  
284 8 0 1.872960 3.451546 -0.912910  
285 6 0 3.508861 5.650231 -0.974654  
286 1 0 2.835520 5.558280 -1.640336  
287 6 0 4.345653 6.728470 -0.988650  
288 1 0 4.262396 7.384214 -1.668706  
289 6 0 6.060949 9.022602 0.973758  
290 6 0 5.025760 8.967600 1.976153

291 1 0 4.364801 8.291603 2.070529  
292 6 0 11.710727 16.979781 -0.321675  
293 1 0 11.386924 17.845044 -0.548502  
294 6 0 10.864001 15.909248 -0.316570  
295 1 0 9.947917 16.028515 -0.530987  
296 6 0 10.557715 12.522398 -1.017825  
297 6 0 11.513550 12.638940 -2.091246  
298 1 0 12.131026 13.348658 -2.224542  
299 6 0 13.201946 -6.808818 5.065792  
300 1 0 13.344623 -7.748048 5.016138  
301 6 0 13.318793 -6.036356 3.946568  
302 1 0 13.551583 -6.434666 3.117976  
303 6 0 12.046584 -3.294136 2.238339  
304 6 0 10.727510 -3.559018 2.757298  
305 1 0 10.512598 -4.104337 3.505086  
306 6 0 13.496360 1.291458 -6.351500  
307 1 0 13.181931 0.980021 -7.193592  
308 6 0 13.377803 0.506534 -5.241162  
309 1 0 12.972882 -0.348573 -5.306276  
310 6 0 14.892705 -0.468436 -2.272857  
311 6 0 16.198111 -0.303083 -2.862781  
312 1 0 16.405532 0.187696 -3.649457  
313 6 0 -7.854647 11.044704 -6.351736  
314 1 0 -7.428305 10.927686 -7.194063  
315 6 0 -7.114834 11.335065 -5.242059  
316 1 0 -6.171875 11.411914 -5.307868  
317 6 0 -7.025875 13.136024 -2.274744  
318 6 0 -7.822188 14.183559 -2.864657  
319 1 0 -8.351474 14.117395 -3.650930  
320 6 0 -0.684473 14.845757 5.058625  
321 1 0 0.057553 15.438907 5.008149  
322 6 0 -1.412644 14.560140 3.940052  
323 1 0 -1.184666 14.960473 3.111095  
324 6 0 -3.152557 12.086386 2.234306  
325 6 0 -2.263265 11.076741 2.753169  
326 1 0 -1.683030 11.163669 3.500509  
327 6 0 -5.625702 -12.322432 -6.341472  
328 1 0 -5.738116 -11.895132 -7.183942  
329 6 0 -6.246297 -11.826342 -5.231620  
330 1 0 -6.784376 -11.048174 -5.297457  
331 6 0 -7.848393 -12.648251 -2.262768  
332 6 0 -8.357838 -13.861950 -2.851701  
333 1 0 -8.036442 -14.287646 -3.637979  
334 6 0 -12.494675 -8.007521 5.071437

335 1 0 -13.379406 -7.661510 5.021397  
336 6 0 -11.884015 -8.495905 3.952692  
337 1 0 -12.345276 -8.499062 3.124056  
338 6 0 -8.872909 -8.766716 2.244994  
339 6 0 -8.442819 -7.491477 2.762901  
340 1 0 -8.807697 -7.032057 3.510258  
341 40 0 -1.603070 1.257571 1.424666  
342 8 0 -1.590885 1.246720 -0.857091  
343 40 0 1.893891 0.777676 1.424191  
344 8 0 1.878622 0.770589 -0.857551  
345 40 0 -0.270188 -2.010833 1.425898  
346 8 0 -0.268464 -1.996006 -0.855826  
347 40 0 1.616269 -1.242614 -1.397891  
348 8 0 1.604091 -1.231711 0.883904  
349 40 0 0.283242 2.025781 -1.398928  
350 8 0 0.281665 2.011006 0.882680  
351 40 0 -1.880726 -0.762617 -1.397363  
352 8 0 -1.865415 -0.755630 0.884374  
353 29 0 -5.127014 12.595803 0.008663  
354 29 0 13.475201 -1.840827 0.011589  
355 29 0 -8.328393 -10.732499 0.019986  
356 29 0 -13.462005 1.855810 0.015237  
357 29 0 5.140209 -12.580818 0.018162  
358 29 0 8.341589 10.747482 0.006840  
359 8 0 0.007028 0.008488 2.187309  
360 8 0 0.006308 0.006450 -2.160570  
361 7 0 -5.354468 10.979522 -1.137631  
362 7 0 -4.911199 14.207340 1.163853  
363 7 0 12.189303 -0.836690 -1.135696  
364 7 0 14.762810 -2.832504 1.167759  
365 7 0 -6.815721 -10.121933 -1.127673  
366 7 0 -9.831131 -11.350771 1.176538  
367 7 0 -11.953445 2.476460 -1.132427  
368 7 0 -14.968853 1.247623 1.171785  
369 7 0 6.421142 -13.581098 1.174338  
370 7 0 3.847634 -11.585283 -1.129117  
371 7 0 8.568192 12.357540 1.162028  
372 7 0 8.124923 9.129723 -1.139456  
373 7 0 5.367665 -10.964537 1.164456  
374 7 0 4.924394 -14.192355 -1.137027  
375 7 0 -12.176106 0.851673 1.162521  
376 7 0 -14.749615 2.847487 -1.140933  
377 7 0 6.828919 10.136917 1.154499  
378 7 0 9.844326 11.365755 -1.149712

379 7 0 11.966641 -2.461477 1.159252  
380 7 0 14.982049 -1.232639 -1.144960  
381 7 0 -6.407946 13.596081 -1.147512  
382 7 0 -3.834438 11.600267 1.155942  
383 7 0 -8.554996 -12.342556 -1.135202  
384 7 0 -8.111726 -9.114738 1.166281  
385 6 0 -1.674575 4.129958 0.011857  
386 6 0 -2.236373 5.507561 0.011337  
387 6 0 -3.273188 8.049972 0.010378  
388 6 0 -3.831301 9.418541 0.009862  
389 6 0 -8.017652 19.684044 0.005988  
390 6 0 -6.980838 17.141631 0.006948  
391 6 0 -6.422726 15.773063 0.007464  
392 6 0 4.417344 -0.597803 0.012816  
393 6 0 5.891283 -0.800073 0.012616  
394 6 0 8.611484 -1.173372 0.012248  
395 6 0 10.075755 -1.374316 0.012049  
396 6 0 21.059118 -2.881581 0.010562  
397 6 0 18.338917 -2.508282 0.010930  
398 6 0 16.874645 -2.307339 0.011129  
399 6 0 -2.722975 -3.509678 0.015565  
400 6 0 -3.635118 -4.685013 0.016284  
401 6 0 -5.318502 -6.854125 0.017612  
402 6 0 -6.224659 -8.021748 0.018327  
403 6 0 -13.021671 -16.779987 0.023687  
404 6 0 -11.338286 -14.610872 0.022359  
405 6 0 -10.432127 -13.443250 0.021644  
406 6 0 -12.862365 6.231524 -6.237167  
407 6 0 -13.077443 4.662042 -3.994554  
408 6 0 -13.193218 3.817198 -2.787366  
409 6 0 -14.061645 -2.519902 6.267639  
410 6 0 -13.846565 -0.950421 4.025026  
411 6 0 -13.730790 -0.105576 2.817838  
412 6 0 9.233847 -10.909043 6.266864  
413 6 0 7.765539 -11.508675 4.025578  
414 6 0 6.975157 -11.831455 2.819105  
415 6 0 1.046570 -14.252593 -6.230540  
416 6 0 2.514878 -13.652961 -3.989254  
417 6 0 3.305260 -13.330182 -2.782781  
418 6 0 4.851310 13.460012 6.256568  
419 6 0 6.103204 12.487082 4.014914  
420 6 0 6.777092 11.963357 2.808243  
421 6 0 11.831870 8.034954 -6.242889  
422 6 0 10.579976 9.007885 -4.001235

423 6 0 9.906086 9.531608 -2.794564  
424 6 0 -9.220650 10.924027 -6.240039  
425 6 0 -7.752343 11.523659 -3.998753  
426 6 0 -6.961961 11.846440 -2.792280  
427 6 0 -1.033376 14.267576 6.257365  
428 6 0 -2.501682 13.667946 4.016080  
429 6 0 -3.292066 13.345165 2.809606  
430 6 0 14.074840 2.534885 -6.240814  
431 6 0 13.859762 0.965404 -3.998201  
432 6 0 13.743986 0.120561 -2.791013  
433 6 0 12.875560 -6.216540 6.263992  
434 6 0 13.090640 -4.647058 4.021378  
435 6 0 13.206416 -3.802214 2.814191  
436 6 0 -4.838114 -13.445027 -6.229743  
437 6 0 -6.090008 -12.472097 -3.988089  
438 6 0 -6.763896 -11.948375 -2.781418  
439 6 0 -11.818674 -8.019971 6.269714  
440 6 0 -10.566780 -8.992901 4.028060  
441 6 0 -9.892891 -9.516625 2.821389  
442 6 0 -4.404150 0.612787 0.014010  
443 6 0 -5.878088 0.815057 0.014209  
444 6 0 -8.598288 1.188355 0.014577  
445 6 0 -10.062559 1.389299 0.014776  
446 6 0 -16.861450 2.322321 0.015696  
447 6 0 8.030849 -19.669061 0.020836  
448 6 0 6.994032 -17.126649 0.019877  
449 6 0 6.435920 -15.758080 0.019361  
450 6 0 1.687771 -4.114973 0.014968  
451 6 0 2.249568 -5.492578 0.015487  
452 6 0 3.286384 -8.034988 0.016447  
453 6 0 3.844497 -9.403556 0.016963  
454 6 0 13.034867 16.794972 0.003138  
455 6 0 11.351481 14.625856 0.004466  
456 6 0 10.445323 13.458232 0.005180  
457 6 0 2.736171 3.524662 0.011260  
458 6 0 3.648313 4.699995 0.010541  
459 6 0 5.331697 6.869109 0.009213  
460 6 0 6.237856 8.036734 0.008498  
461 1 0 13.690883 17.640276 0.002621  
462 1 0 4.424883 13.783924 7.042470  
463 1 0 12.319734 7.655803 -7.116464  
464 1 0 -9.729214 10.716339 -7.016331  
465 1 0 -8.376764 20.564633 0.005656  
466 1 0 -0.535247 14.464610 7.043142

467 1 0 -12.787871 6.775130 -7.013919  
 468 6 0 -18.387152 2.531697 0.015903  
 469 6 0 -18.932776 3.685631 0.579107  
 470 6 0 -19.223547 1.567806 -0.547039  
 471 6 0 -20.314541 3.875233 0.579929  
 472 1 0 -18.362149 4.342550 0.963570  
 473 6 0 -20.605690 1.757773 -0.547179  
 474 1 0 -18.851643 0.781008 -0.931237  
 475 6 0 -21.151288 2.911183 0.016296  
 476 1 0 -20.686678 4.661776 0.964423  
 477 1 0 -21.175892 1.100399 -0.931495  
 478 1 0 -22.093726 3.040720 0.016912  
 479 1 0 -14.136139 -3.063509 7.044391  
 480 1 0 -12.252280 -7.682986 7.046134  
 481 1 0 -13.604729 -17.531283 0.024147  
 482 1 0 -4.404508 -13.782011 -7.006163  
 483 1 0 0.538008 -14.460282 -7.006832  
 484 1 0 8.389961 -20.549650 0.021168  
 485 1 0 9.742409 -10.701356 7.043156  
 486 1 0 12.801065 -6.760147 7.040744  
 487 1 0 22.001287 -3.010876 0.010434  
 488 1 0 14.149335 3.078492 -7.017567  
 489 6 0 -1.585039 -2.282188 -3.869220  
 490 1 0 -1.248800 -1.269008 -3.942523  
 491 1 0 -1.407152 -2.816350 -2.949621  
 492 1 0 -2.056381 -2.765284 -4.682616

Zr<sub>6</sub>O<sub>8</sub>(TCPP-Cu)<sub>6</sub>--CH<sub>3</sub>

-----  
 Center Atomic Atomic Coordinates (Angstroms)

Number Number Type X Y Z

-----  
 1 8 0 -2.994151 2.582891 0.926214  
 2 6 0 -4.775938 4.665195 0.984690  
 3 1 0 -4.836390 3.988419 1.650496  
 4 6 0 -5.642059 5.720039 0.997094  
 5 1 0 -6.300945 5.784314 1.676171  
 6 6 0 -7.496393 7.900275 -0.968699  
 7 6 0 -7.670596 6.878305 -1.971030  
 8 1 0 -7.157659 6.083999 -2.064411  
 9 6 0 -14.006337 15.172666 0.314978  
 10 1 0 -14.922158 15.048634 0.540509  
 11 6 0 -13.149944 14.109841 0.311454  
 12 1 0 -13.469476 13.242998 0.525675



13 6 0 -9.916094 13.061179 1.017749  
14 6 0 -9.819584 14.019420 2.091015  
15 1 0 -10.375092 14.778805 2.223264  
16 8 0 3.661129 1.259026 0.933256  
17 6 0 6.355253 1.760896 0.996481  
18 1 0 5.798309 2.151044 1.661745  
19 6 0 7.701813 1.983545 1.011233  
20 1 0 8.085835 2.521417 1.691402  
21 6 0 10.520306 2.500880 -0.949534  
22 6 0 9.723923 3.163668 -1.952728  
23 1 0 8.779698 3.116833 -2.047549  
24 6 0 20.071238 4.501512 0.351105  
25 1 0 20.421372 5.356451 0.577955  
26 6 0 18.722616 4.291268 0.345241  
27 1 0 18.131332 5.001223 0.559149  
28 6 0 16.196404 2.014368 1.045474  
29 6 0 16.976294 1.450725 2.119493  
30 1 0 17.911482 1.551999 2.253327  
31 8 0 -0.813011 -3.842684 0.928624  
32 6 0 -1.725537 -6.426854 0.988096  
33 1 0 -1.110252 -6.140193 1.654598  
34 6 0 -2.206020 -7.704346 1.000947  
35 1 0 -1.933306 -8.306458 1.681017  
36 6 0 -3.163913 -10.402209 -0.963818  
37 6 0 -2.190189 -10.043029 -1.964962  
38 1 0 -1.758621 -9.201749 -2.058456  
39 6 0 -6.209035 -19.674973 0.323795  
40 1 0 -5.644066 -20.405870 0.550898  
41 6 0 -5.716794 -18.401907 0.319847  
42 1 0 -4.806656 -18.245008 0.535348  
43 6 0 -6.426653 -15.076319 1.021908  
44 6 0 -7.306451 -15.470851 2.094167  
45 1 0 -7.686552 -16.331504 2.226629  
46 6 0 -14.663079 2.610996 -5.062367  
47 1 0 -15.077207 3.465990 -5.012762  
48 6 0 -14.547482 1.837996 -3.943384  
49 1 0 -14.888578 2.149245 -3.115021  
50 6 0 -12.523064 -0.406111 -2.233985  
51 6 0 -11.340765 0.237287 -2.751325  
52 1 0 -11.295917 0.822130 -3.498784  
53 6 0 -12.561314 -5.219459 6.353511  
54 1 0 -12.353992 -4.829366 7.196020  
55 6 0 -12.678971 -4.434052 5.243417  
56 1 0 -12.545136 -3.497474 5.309129

57 6 0 -14.411160 -3.949309 2.273423  
58 6 0 -15.609919 -4.493623 2.861758  
59 1 0 -15.663784 -5.024170 3.648119  
60 6 0 10.719078 -8.221814 6.378118  
61 1 0 10.276266 -8.236525 7.219949  
62 6 0 10.099467 -8.717453 5.267517  
63 1 0 9.221346 -9.069777 5.332184  
64 6 0 10.550413 -10.462734 2.299863  
65 6 0 11.620257 -11.228179 2.890595  
66 1 0 12.105424 -11.008817 3.677512  
67 6 0 5.006483 -13.967942 -5.041338  
68 1 0 4.473023 -14.754037 -4.991831  
69 6 0 5.616368 -13.480281 -3.921855  
70 1 0 5.516068 -13.930526 -3.093224  
71 6 0 6.544936 -10.603428 -2.213698  
72 6 0 5.397399 -9.901711 -2.733497  
73 1 0 4.869659 -10.155994 -3.481545  
74 6 0 1.678997 13.440785 6.368216  
75 1 0 1.911823 13.065444 7.210764  
76 6 0 2.419779 13.150962 5.259045  
77 1 0 3.163858 12.566710 5.325427  
78 6 0 3.710415 14.411348 2.292226  
79 6 0 3.837463 15.721136 2.881928  
80 1 0 3.403673 16.032360 3.667875  
81 6 0 9.529475 11.355876 -5.036997  
82 1 0 10.476906 11.286981 -4.985940  
83 6 0 8.800454 11.641273 -3.918923  
84 1 0 9.239227 11.780310 -3.089733  
85 6 0 5.842065 11.008613 -2.214807  
86 6 0 5.808943 9.663471 -2.733396  
87 1 0 6.294201 9.332875 -3.480374  
88 6 0 -12.760224 7.670400 -5.060446  
89 1 0 -13.635155 7.300186 -5.011306  
90 6 0 -12.164160 8.174892 -3.940978  
91 1 0 -12.626033 8.165014 -3.112736  
92 6 0 -9.163076 8.527597 -2.230593  
93 6 0 -8.697668 7.264885 -2.748657  
94 1 0 -9.049153 6.795938 -3.496516  
95 6 0 -6.022050 12.167460 6.360113  
96 1 0 -6.123392 11.736867 7.202311  
97 6 0 -6.627842 11.654989 5.249527  
98 1 0 -7.144389 10.862299 5.314583  
99 6 0 -8.249412 12.433858 2.279644  
100 6 0 -8.792511 13.632840 2.868641

101 1 0 -8.483599 14.066867 3.655369  
102 6 0 12.959619 7.178253 -5.033308  
103 1 0 13.076391 8.121028 -4.983144  
104 6 0 13.096703 6.408806 -3.914302  
105 1 0 13.317760 6.813004 -3.085347  
106 6 0 11.898716 3.631773 -2.208416  
107 6 0 10.573485 3.860559 -2.728366  
108 1 0 10.344286 4.400215 -3.476018  
109 6 0 13.466872 -0.915846 6.380894  
110 1 0 13.143292 -0.613531 7.222843  
111 6 0 13.327727 -0.133993 5.270777  
112 1 0 12.899406 0.709636 5.335898  
113 6 0 14.817774 0.883503 2.304154  
114 6 0 16.126730 0.753853 2.895145  
115 1 0 16.346893 0.268616 3.681795  
116 6 0 -0.326514 -14.849723 -5.046948  
117 1 0 0.431487 -15.422282 -4.996083  
118 6 0 -1.063203 -14.584711 -3.928882  
119 1 0 -0.825011 -14.978988 -3.099895  
120 6 0 -2.871874 -12.160444 -2.223605  
121 6 0 -2.010223 -11.126519 -2.741291  
122 1 0 -1.427188 -11.197145 -3.488170  
123 6 0 -7.608058 -11.252104 6.358838  
124 1 0 -7.185804 -11.123779 7.201578  
125 6 0 -6.859609 -11.521542 5.249676  
126 1 0 -5.914951 -11.572478 5.316260  
127 6 0 -6.718691 -13.318084 2.281696  
128 6 0 -7.486416 -14.387360 2.870495  
129 1 0 -8.017981 -14.336108 3.656342  
130 8 0 -3.966387 -0.002141 0.925232  
131 6 0 -6.678792 -0.394210 0.982769  
132 1 0 -6.278439 0.154222 1.649039  
133 6 0 -8.025381 -0.616857 0.994689  
134 1 0 -8.563491 -0.231455 1.673886  
135 6 0 -10.856383 -1.033434 -0.972091  
136 6 0 -10.313692 -0.149292 -1.973699  
137 1 0 -9.404423 0.110190 -2.066679  
138 6 0 -16.077844 -3.321986 1.011528  
139 6 0 -16.636992 -4.107042 2.084131  
140 1 0 -17.555277 -4.312231 2.216015  
141 6 0 12.118101 -16.644683 0.343075  
142 1 0 11.818004 -17.518614 0.569268  
143 6 0 11.242281 -15.597820 0.337688  
144 1 0 10.329641 -15.742306 0.551272

145 6 0 10.842452 -12.220969 1.040076  
146 6 0 11.800224 -12.311670 2.114267  
147 1 0 12.436855 -13.004212 2.247799  
148 8 0 1.911810 -3.392151 0.931490  
149 6 0 3.607459 -5.545072 0.993705  
150 1 0 2.931284 -5.471948 1.658850  
151 6 0 4.473552 -6.599916 1.007974  
152 1 0 4.407773 -7.257997 1.687689  
153 6 0 6.252896 -8.845193 -0.953911  
154 6 0 5.217434 -8.818221 -1.957168  
155 1 0 4.538228 -8.160600 -2.051831  
156 6 0 8.283363 18.858142 0.338427  
157 1 0 9.189903 19.035427 0.565876  
158 6 0 7.814669 17.576223 0.333510  
159 1 0 8.395782 16.858296 0.548678  
160 6 0 5.089045 15.542195 1.033535  
161 6 0 4.687028 16.418008 2.106276  
162 1 0 4.968261 17.315742 2.239406  
163 8 0 1.908546 3.393525 0.931371  
164 6 0 2.925109 5.938519 0.992791  
165 1 0 3.198826 5.316996 1.658949  
166 6 0 3.405563 7.216011 1.006613  
167 1 0 4.007302 7.488724 1.687016  
168 6 0 4.463434 9.877765 -0.956117  
169 6 0 4.959380 8.966601 -1.957743  
170 1 0 4.729613 8.049492 -2.051904  
171 6 0 12.664820 -7.670941 5.070385  
172 1 0 13.539752 -7.300728 5.021245  
173 6 0 12.068756 -8.175434 3.950917  
174 1 0 12.530628 -8.165555 3.122674  
175 6 0 9.067670 -8.528139 2.240531  
176 6 0 8.602263 -7.265427 2.758595  
177 1 0 8.953748 -6.796480 3.506453  
178 6 0 5.926646 -12.168002 -6.350175  
179 1 0 6.027987 -11.737409 -7.192372  
180 6 0 6.532437 -11.655531 -5.239588  
181 1 0 7.048986 -10.862841 -5.304644  
182 6 0 8.154007 -12.434399 -2.269705  
183 6 0 8.697106 -13.633383 -2.858702  
184 1 0 8.388195 -14.067409 -3.645430  
185 6 0 -13.055023 -7.178795 5.043246  
186 1 0 -13.171795 -8.121570 4.993082  
187 6 0 -13.192107 -6.409348 3.924241  
188 1 0 -13.413165 -6.813546 3.095285

189 6 0 -11.994291 -3.632463 2.218232  
190 6 0 -10.668873 -3.861225 2.738210  
191 1 0 -10.439691 -4.400757 3.485956  
192 6 0 -13.562277 0.915304 -6.370955  
193 1 0 -13.238697 0.612990 -7.212905  
194 6 0 -13.423131 0.133451 -5.260838  
195 1 0 -12.994811 -0.710178 -5.325959  
196 6 0 -14.913175 -0.884072 -2.294234  
197 6 0 -16.222134 -0.754394 -2.885207  
198 1 0 -16.442298 -0.269158 -3.671856  
199 6 0 0.231110 14.849181 5.056887  
200 1 0 -0.526890 15.421741 5.006021  
201 6 0 0.967799 14.584169 3.938821  
202 1 0 0.729607 14.978447 3.109834  
203 6 0 2.776470 12.159902 2.233544  
204 6 0 1.914819 11.125978 2.751228  
205 1 0 1.331785 11.196602 3.498109  
206 6 0 7.512654 11.251561 -6.348899  
207 1 0 7.090399 11.123238 -7.191640  
208 6 0 6.764205 11.520999 -5.239737  
209 1 0 5.819546 11.571936 -5.306322  
210 6 0 6.623286 13.317541 -2.271757  
211 6 0 7.391012 14.386818 -2.860556  
212 1 0 7.922577 14.335567 -3.646404  
213 8 0 3.870983 0.001599 -0.915292  
214 6 0 6.583387 0.393667 -0.972830  
215 1 0 6.183034 -0.154764 -1.639102  
216 6 0 7.929977 0.616316 -0.984750  
217 1 0 8.468087 0.230913 -1.663949  
218 6 0 10.760938 1.033084 0.982162  
219 6 0 10.218288 0.148750 1.983637  
220 1 0 9.309018 -0.110731 2.076618  
221 6 0 20.450195 2.213712 -0.298437  
222 1 0 21.057354 1.517057 -0.524279  
223 6 0 19.105668 1.978658 -0.295406  
224 1 0 18.774819 1.116233 -0.510284  
225 6 0 15.982466 3.321244 -1.001739  
226 6 0 16.541587 4.106501 -2.074193  
227 1 0 17.459873 4.311689 -2.206076  
228 6 0 -12.213505 16.644142 -0.333137  
229 1 0 -11.913409 17.518073 -0.559329  
230 6 0 -11.337686 15.597277 -0.327750  
231 1 0 -10.425045 15.741764 -0.541333  
232 6 0 -10.937857 12.220428 -1.030137

233 6 0 -11.895627 12.311128 -2.104328  
234 1 0 -12.532260 13.003670 -2.237860  
235 8 0 -2.007215 3.391609 -0.921551  
236 6 0 -3.702864 5.544529 -0.983768  
237 1 0 -3.026689 5.471406 -1.648911  
238 6 0 -4.568955 6.599374 -0.998036  
239 1 0 -4.503178 7.257456 -1.677750  
240 6 0 -6.348301 8.844651 0.963850  
241 6 0 -5.312838 8.817679 1.967107  
242 1 0 -4.633633 8.160059 2.061770  
243 6 0 -8.378767 -18.858683 -0.328489  
244 1 0 -9.285307 -19.035970 -0.555937  
245 6 0 -7.910073 -17.576764 -0.323571  
246 1 0 -8.491187 -16.858838 -0.538740  
247 6 0 -5.184450 -15.542737 -1.023597  
248 6 0 -4.782433 -16.418549 -2.096337  
249 1 0 -5.063666 -17.316285 -2.229467  
250 8 0 -2.003950 -3.394067 -0.921431  
251 6 0 -3.020514 -5.939061 -0.982852  
252 1 0 -3.294230 -5.317538 -1.649010  
253 6 0 -3.500968 -7.216553 -0.996675  
254 1 0 -4.102707 -7.489266 -1.677077  
255 6 0 -4.558839 -9.878306 0.966055  
256 6 0 -5.054784 -8.967142 1.967682  
257 1 0 -4.825018 -8.050034 2.061843  
258 8 0 2.898746 -2.583433 -0.916275  
259 6 0 4.680534 -4.665737 -0.974751  
260 1 0 4.740985 -3.988961 -1.640557  
261 6 0 5.546653 -5.720581 -0.987157  
262 1 0 6.205540 -5.784856 -1.666232  
263 6 0 7.400988 -7.900817 0.978638  
264 6 0 7.575191 -6.878847 1.980969  
265 1 0 7.062255 -6.084541 2.074349  
266 6 0 13.910933 -15.173207 -0.305040  
267 1 0 14.826754 -15.049176 -0.530570  
268 6 0 13.054540 -14.110383 -0.301515  
269 1 0 13.374072 -13.243540 -0.515737  
270 6 0 9.820689 -13.061721 -1.007812  
271 6 0 9.724179 -14.019962 -2.081076  
272 1 0 10.279688 -14.779347 -2.213326  
273 8 0 -3.756534 -1.259568 -0.923317  
274 6 0 -6.450656 -1.761438 -0.986542  
275 1 0 -5.893714 -2.151587 -1.651806  
276 6 0 -7.797217 -1.984087 -1.001295

277 1 0 -8.181239 -2.521959 -1.681464  
278 6 0 -10.615659 -2.501614 0.959541  
279 6 0 -9.819309 -3.164353 1.962558  
280 1 0 -8.875102 -3.117374 2.057488  
281 6 0 -16.325590 -1.811661 -0.867734  
282 6 0 -17.071698 -1.451266 -2.109554  
283 1 0 -18.006886 -1.552541 -2.243388  
284 8 0 0.717607 3.842142 -0.918683  
285 6 0 1.630132 6.426311 -0.978157  
286 1 0 1.014847 6.139650 -1.644659  
287 6 0 2.110616 7.703804 -0.991008  
288 1 0 1.837901 8.305916 -1.671079  
289 6 0 3.068509 10.401667 0.973756  
290 6 0 2.094784 10.042487 1.974900  
291 1 0 1.663216 9.201207 2.068394  
292 6 0 6.113630 19.674430 -0.313856  
293 1 0 5.548662 20.405329 -0.540960  
294 6 0 5.621389 18.401365 -0.309908  
295 1 0 4.711252 18.244466 -0.525409  
296 6 0 6.331248 15.075776 -1.011970  
297 6 0 7.211046 15.470309 -2.084228  
298 1 0 7.591147 16.330962 -2.216690  
299 6 0 14.567673 -2.611538 5.072306  
300 1 0 14.981802 -3.466531 5.022701  
301 6 0 14.452077 -1.838538 3.953323  
302 1 0 14.793174 -2.149786 3.124959  
303 6 0 12.427691 0.405356 2.243762  
304 6 0 11.245361 -0.237829 2.761264  
305 1 0 11.200513 -0.822672 3.508722  
306 6 0 12.465909 5.218917 -6.343572  
307 1 0 12.258587 4.828824 -7.186082  
308 6 0 12.583567 4.433511 -5.233479  
309 1 0 12.449732 3.496933 -5.299191  
310 6 0 14.315717 3.948967 -2.263348  
311 6 0 15.514515 4.493082 -2.851819  
312 1 0 15.568380 5.023628 -3.638181  
313 6 0 -10.814482 8.221272 -6.368181  
314 1 0 -10.371669 8.235983 -7.210010  
315 6 0 -10.194870 8.716911 -5.257578  
316 1 0 -9.316749 9.069236 -5.322245  
317 6 0 -10.645817 10.462192 -2.289924  
318 6 0 -11.715661 11.227638 -2.880657  
319 1 0 -12.200829 11.008274 -3.667574  
320 6 0 -5.101887 13.967401 5.051276

321 1 0 -4.568426 14.753495 5.001769  
322 6 0 -5.711772 13.479739 3.931793  
323 1 0 -5.611472 13.929985 3.103162  
324 6 0 -6.640340 10.602886 2.223637  
325 6 0 -5.492803 9.901169 2.743436  
326 1 0 -4.965063 10.155453 3.491484  
327 6 0 -1.774401 -13.441327 -6.358277  
328 1 0 -2.007227 -13.065986 -7.200826  
329 6 0 -2.515183 -13.151503 -5.249106  
330 1 0 -3.259261 -12.567252 -5.315489  
331 6 0 -3.805820 -14.411889 -2.282287  
332 6 0 -3.932868 -15.721678 -2.871990  
333 1 0 -3.499078 -16.032902 -3.657936  
334 6 0 -9.624880 -11.356418 5.046935  
335 1 0 -10.572310 -11.287523 4.995879  
336 6 0 -8.895857 -11.641816 3.928862  
337 1 0 -9.334631 -11.780852 3.099672  
338 6 0 -5.937470 -11.009155 2.224745  
339 6 0 -5.904347 -9.664013 2.743334  
340 1 0 -6.389605 -9.333417 3.490312  
341 40 0 -1.956637 0.717148 1.414451  
342 8 0 -1.939252 0.711477 -0.867280  
343 40 0 1.525815 1.292953 1.418114  
344 8 0 1.515853 1.282758 -0.863643  
345 40 0 0.283249 -2.010843 1.416859  
346 8 0 0.283046 -1.995093 -0.864888  
347 40 0 1.861233 -0.717694 -1.404515  
348 8 0 1.843847 -0.712019 0.877218  
349 40 0 -0.378660 2.010299 -1.406919  
350 8 0 -0.378451 1.994550 0.874827  
351 40 0 -1.621220 -1.293491 -1.408169  
352 8 0 -1.611258 -1.283301 0.873583  
353 29 0 -8.674662 10.506633 -0.004309  
354 29 0 13.365032 2.217799 0.019053  
355 29 0 -4.833463 -12.724892 0.000137  
356 29 0 -13.460422 -2.217989 -0.009141  
357 29 0 8.579257 -10.507175 0.014248  
358 29 0 4.738059 12.724350 0.009802  
359 8 0 -0.049996 -0.000233 2.178865  
360 8 0 -0.045398 -0.000305 -2.168932  
361 7 0 -8.412654 8.895936 -1.151086  
362 7 0 -8.946396 12.109351 1.151348  
363 7 0 11.841084 2.796981 -1.129564  
364 7 0 14.886986 1.650323 1.176696



365 7 0 -3.567766 -11.693716 -1.145625  
366 7 0 -6.087402 -13.760497 1.154803  
367 7 0 -12.201635 -1.178397 -1.154911  
368 7 0 -14.721271 -3.245176 1.145518  
369 7 0 10.097439 -11.084423 1.171831  
370 7 0 7.051347 -9.937905 -1.134453  
371 7 0 4.477068 14.328845 1.165470  
372 7 0 5.010811 11.115431 -1.136964  
373 7 0 8.317250 -8.896477 1.161024  
374 7 0 8.850991 -12.109892 -1.141409  
375 7 0 -11.936346 -2.797451 1.139557  
376 7 0 -14.982438 -1.650933 -1.166727  
377 7 0 3.472362 11.693174 1.155564  
378 7 0 5.991997 13.759955 -1.144865  
379 7 0 12.106130 1.177901 1.164782  
380 7 0 14.625986 3.244636 -1.135446  
381 7 0 -10.192843 11.083881 -1.161892  
382 7 0 -7.146752 9.937363 1.144392  
383 7 0 -4.572472 -14.329386 -1.155531  
384 7 0 -5.106215 -11.115972 1.146902  
385 6 0 -2.872890 3.440569 0.001931  
386 6 0 -3.816982 4.590392 0.000915  
387 6 0 -5.559336 6.712431 -0.000958  
388 6 0 -6.497236 7.854714 -0.001967  
389 6 0 -13.532339 16.422874 -0.009534  
390 6 0 -11.789986 14.300835 -0.007660  
391 6 0 -10.852087 13.158551 -0.006651  
392 6 0 4.344744 0.725995 0.009591  
393 6 0 5.812567 0.968692 0.011135  
394 6 0 8.521482 1.416596 0.013985  
395 6 0 9.979660 1.657857 0.015646  
396 6 0 20.917470 3.466203 0.027025  
397 6 0 18.208555 3.018299 0.024175  
398 6 0 16.750359 2.777194 0.022641  
399 6 0 -1.614961 -4.167375 0.003386  
400 6 0 -2.138692 -5.559898 0.002858  
401 6 0 -3.105253 -8.129839 0.001882  
402 6 0 -3.625548 -9.513225 0.001357  
403 6 0 -7.528237 -19.889889 -0.002584  
404 6 0 -6.561675 -17.319946 -0.001608  
405 6 0 -6.041379 -15.936559 -0.001083  
406 6 0 -14.174798 2.142317 -6.260251  
407 6 0 -13.918566 0.578362 -4.018102  
408 6 0 -13.780637 -0.263507 -2.811163

409 6 0 -12.746047 -6.578294 6.241968  
410 6 0 -13.002279 -5.014339 3.999820  
411 6 0 -13.140208 -4.172470 2.792881  
412 6 0 11.988405 -7.702485 6.268078  
413 6 0 10.765611 -8.708471 4.024953  
414 6 0 10.107386 -9.249990 2.817489  
415 6 0 5.170109 -13.311865 -6.239583  
416 6 0 6.392902 -12.305878 -3.996458  
417 6 0 7.051126 -11.764361 -2.788994  
418 6 0 0.594756 14.280286 6.255687  
419 6 0 2.080877 13.722203 4.015411  
420 6 0 2.880849 13.421789 2.809482  
421 6 0 8.881362 11.168416 -6.236083  
422 6 0 7.395242 11.726499 -3.995808  
423 6 0 6.595270 12.026913 -2.789879  
424 6 0 -12.083810 7.701943 -6.258140  
425 6 0 -10.861016 8.707930 -4.015014  
426 6 0 -10.202791 9.249448 -2.807551  
427 6 0 -5.265514 13.311322 6.249522  
428 6 0 -6.488307 12.305336 4.006396  
429 6 0 -7.146531 11.763819 2.798933  
430 6 0 12.650642 6.577752 -6.232030  
431 6 0 12.906875 5.013798 -3.989881  
432 6 0 13.044795 4.172032 -2.782863  
433 6 0 14.079393 -2.142859 6.270189  
434 6 0 13.823162 -0.578903 4.028040  
435 6 0 13.685233 0.262966 2.821102  
436 6 0 -0.690161 -14.280828 -6.245748  
437 6 0 -2.176281 -13.722744 -4.005472  
438 6 0 -2.976252 -13.422332 -2.799544  
439 6 0 -8.976766 -11.168958 6.246022  
440 6 0 -7.490647 -11.727041 4.005747  
441 6 0 -6.690674 -12.027455 2.799818  
442 6 0 -4.440149 -0.726537 0.000348  
443 6 0 -5.907972 -0.969234 -0.001196  
444 6 0 -8.616886 -1.417138 -0.004046  
445 6 0 -10.075081 -1.658242 -0.005580  
446 6 0 -16.845763 -2.777737 -0.012703  
447 6 0 13.436935 -16.423416 0.019472  
448 6 0 11.694581 -14.301378 0.017598  
449 6 0 10.756682 -13.159094 0.016590  
450 6 0 2.777486 -3.441110 0.008008  
451 6 0 3.721578 -4.590934 0.009023  
452 6 0 5.463931 -6.712973 0.010897

453 6 0 6.401832 -7.855255 0.011906  
454 6 0 7.432832 19.889347 0.012522  
455 6 0 6.466270 17.319405 0.011547  
456 6 0 5.945975 15.936016 0.011021  
457 6 0 1.519556 4.166834 0.006551  
458 6 0 2.043288 5.559356 0.007081  
459 6 0 3.009849 8.129297 0.008056  
460 6 0 3.530144 9.512684 0.008582  
461 1 0 7.809502 20.890855 0.012903  
462 1 0 0.090738 14.463214 7.041118  
463 1 0 9.460505 10.950931 -7.109121  
464 1 0 -12.507337 7.353509 -7.035069  
465 1 0 -14.135821 17.157863 -0.010183  
466 1 0 -4.848812 13.646488 7.035921  
467 1 0 -14.263548 2.684009 -7.036842  
468 6 0 -18.365135 -3.028956 -0.014301  
469 6 0 -19.228253 -2.088282 0.548397  
470 6 0 -18.878416 -4.196822 -0.578372  
471 6 0 -20.604278 -2.315820 0.547584  
472 1 0 -18.877862 -1.292171 0.933631  
473 6 0 -20.254912 -4.424124 -0.580148  
474 1 0 -18.290028 -4.838248 -0.962226  
475 6 0 -21.117850 -3.483941 -0.017178  
476 1 0 -21.192817 -1.674708 0.931733  
477 1 0 -20.604760 -5.220544 -0.965234  
478 1 0 -22.056439 -3.638927 -0.017677  
479 1 0 -12.657298 -7.119987 7.018560  
480 1 0 -9.491501 -10.975660 7.021964  
481 1 0 -7.863015 -20.780015 -0.002921  
482 1 0 -0.175428 -14.474125 -7.021690  
483 1 0 4.746581 -13.660299 -7.016512  
484 1 0 14.040417 -17.158404 0.020121  
485 1 0 12.411932 -7.354051 7.045008  
486 1 0 14.168143 -2.684551 7.046781  
487 1 0 21.855730 3.621338 0.028012  
488 1 0 12.561894 7.119445 -7.008622  
489 6 0 13.685887 -0.009923 -1.488712  
490 1 0 14.692638 0.117450 -1.175108  
491 1 0 13.138655 -0.847317 -1.140128  
492 1 0 13.254372 0.621894 -2.224444

CH<sub>2</sub>--Zr<sub>6</sub>O<sub>8</sub> (TCPP-Cu)<sub>6</sub>

-----  
Center Atomic Atomic Coordinates (Angstroms)

Number Number Type X Y Z

-----  
1 8 0 -1.673432 -3.544076 -0.934189  
2 6 0 -2.485716 -6.161480 -0.993885  
3 1 0 -2.808205 -5.563816 -1.660050  
4 6 0 -2.863709 -7.472955 -1.006865  
5 1 0 -3.442528 -7.792660 -1.686693  
6 6 0 -3.706401 -10.209163 0.957661  
7 6 0 -4.272047 -9.339622 1.959351  
8 1 0 -4.115413 -8.407185 2.053001  
9 6 0 -6.805588 -19.463904 -0.330618  
10 1 0 -7.695453 -19.712381 -0.557283  
11 6 0 -6.439675 -18.148950 -0.326533  
12 1 0 -7.075876 -17.479289 -0.541501  
13 6 0 -3.883873 -15.906157 -1.029451  
14 6 0 -3.414708 -16.747909 -2.102195  
15 1 0 -3.624210 -17.665120 -2.234777  
16 8 0 3.914744 0.305301 -0.933927  
17 6 0 6.587632 0.910497 -0.993753  
18 1 0 6.231371 0.331858 -1.659509  
19 6 0 7.912401 1.238873 -1.006819  
20 1 0 8.478773 0.896920 -1.686305  
21 6 0 10.703118 1.878727 0.957566  
22 6 0 10.232767 0.954881 1.959923  
23 1 0 9.346923 0.624385 2.053717  
24 6 0 20.267721 3.821110 -0.331000  
25 1 0 20.927868 3.174525 -0.557072  
26 6 0 18.945979 3.480526 -0.326820  
27 1 0 18.684164 2.594561 -0.541124  
28 6 0 15.725855 4.571966 -1.031013  
29 6 0 16.220390 5.398307 -2.104342  
30 1 0 17.119486 5.675375 -2.237026  
31 8 0 -2.213001 3.220115 -0.936752  
32 6 0 -4.073553 5.232257 -0.998401  
33 1 0 -3.394220 5.212523 -1.664054  
34 6 0 -5.020317 6.215343 -1.012364  
35 1 0 -5.007274 6.876276 -1.692366  
36 6 0 -6.970059 8.313791 0.950121  
37 6 0 -5.934941 8.369165 1.952567  
38 1 0 -5.205813 7.767324 2.046930  
39 6 0 -13.434346 15.624774 -0.345033  
40 1 0 -13.204432 16.519593 -0.571778  
41 6 0 -12.478522 14.650407 -0.339961  
42 1 0 -11.580318 14.866484 -0.554320

43 6 0 -11.813585 11.315426 -1.041447  
44 6 0 -12.776344 11.329690 -2.114913  
45 1 0 -13.465822 11.969692 -2.248190  
46 6 0 -12.386261 -8.187880 5.040606  
47 1 0 -12.428192 -9.136956 4.990875  
48 6 0 -12.584582 -7.432146 3.921433  
49 1 0 -12.773631 -7.852901 3.092798  
50 6 0 -11.611285 -4.569997 2.213473  
51 6 0 -10.271540 -4.693068 2.732484  
52 1 0 -9.999861 -5.212483 3.480244  
53 6 0 -13.540341 -0.164011 -6.376107  
54 1 0 -13.194522 -0.440159 -7.218206  
55 6 0 -13.338991 -0.931953 -5.265819  
56 1 0 -12.845385 -1.739117 -5.330975  
57 6 0 -14.741695 -2.062807 -2.297669  
58 6 0 -16.057258 -2.037239 -2.887652  
59 1 0 -16.315683 -1.571253 -3.674302  
60 6 0 6.651731 11.805600 -6.374472  
61 1 0 6.240300 11.643949 -7.216832  
62 6 0 5.885173 12.015509 -5.264815  
63 1 0 4.939393 11.991597 -5.330669  
64 6 0 5.604963 13.796546 -2.297372  
65 6 0 6.285325 14.922907 -2.887164  
66 1 0 6.818680 14.913497 -3.673415  
67 6 0 -0.882694 14.821276 5.035779  
68 1 0 -1.683614 15.332113 4.985308  
69 6 0 -0.128215 14.614845 3.917226  
70 1 0 -0.397456 14.988713 3.088285  
71 6 0 1.865103 12.340393 2.211391  
72 6 0 1.088261 11.241820 2.730132  
73 1 0 0.502038 11.266457 3.477447  
74 6 0 6.921681 -11.666052 -6.366046  
75 1 0 6.988031 -11.229152 -7.208478  
76 6 0 7.485919 -11.106836 -5.256124  
77 1 0 7.938150 -10.275827 -5.321874  
78 6 0 9.166234 -11.753851 -2.287246  
79 6 0 9.801949 -12.906408 -2.876240  
80 1 0 9.527709 -13.363823 -3.662566  
81 6 0 13.292034 -6.645680 5.047551  
82 1 0 14.134931 -6.207495 4.997585  
83 6 0 12.736856 -7.196177 3.928738  
84 1 0 13.195872 -7.150175 3.100126  
85 6 0 9.771735 -7.785696 2.220856  
86 6 0 9.208378 -6.563498 2.738834

87 1 0 9.522269 -6.067922 3.486245  
88 6 0 -8.636663 -12.081327 5.043086  
89 1 0 -9.586611 -12.087549 4.992754  
90 6 0 -7.888215 -12.308683 3.924537  
91 1 0 -8.315258 -12.482316 3.095746  
92 6 0 -4.990383 -11.444903 2.217851  
93 6 0 -5.063284 -10.101133 2.735928  
94 1 0 -5.572585 -9.809608 3.483171  
95 6 0 -0.654641 -13.544057 -6.367588  
96 1 0 -0.917045 -13.188648 -7.210088  
97 6 0 -1.415169 -13.313221 -5.257937  
98 1 0 -2.203145 -12.789633 -5.323940  
99 6 0 -2.599892 -14.670418 -2.289642  
100 6 0 -2.623470 -15.986399 -2.878770  
101 1 0 -2.167038 -16.262697 -3.664948  
102 6 0 14.789060 -1.451709 5.046141  
103 1 0 15.269431 -2.271318 4.996516  
104 6 0 14.611879 -0.690736 3.926971  
105 1 0 14.975877 -0.974401 3.098449  
106 6 0 12.415128 1.385628 2.218366  
107 6 0 11.287772 0.651015 2.736875  
108 1 0 11.289857 0.064774 3.484580  
109 6 0 12.066292 6.183316 -6.370893  
110 1 0 11.889810 5.777700 -7.213096  
111 6 0 12.246501 5.410135 -5.260609  
112 1 0 12.187059 4.465881 -5.325877  
113 6 0 14.013845 5.065066 -2.291812  
114 6 0 15.165385 5.702174 -2.881294  
115 1 0 15.176550 6.234985 -3.667888  
116 6 0 -6.129318 13.520751 5.034711  
117 1 0 -5.659693 14.346529 4.984499  
118 6 0 -6.699604 12.985942 3.915888  
119 1 0 -6.635834 13.442354 3.087015  
120 6 0 -7.399191 10.043976 2.209505  
121 6 0 -6.199387 9.435370 2.728647  
122 1 0 -5.692827 9.730887 3.476186  
123 6 0 -11.378580 7.336280 -6.378144  
124 1 0 -10.938956 7.385585 -7.220329  
125 6 0 -10.799234 7.879808 -5.268213  
126 1 0 -9.951757 8.300405 -5.333702  
127 6 0 -11.384452 9.585241 -2.300833  
128 6 0 -12.511897 10.263484 -2.890993  
129 1 0 -12.978807 10.006131 -3.677446  
130 8 0 -3.589237 -1.554773 -0.935454

131 6 0 -6.235314 -2.268032 -0.996364  
132 1 0 -5.649784 -2.613222 -1.661928  
133 6 0 -7.560075 -2.596418 -1.009970  
134 1 0 -7.900902 -3.163246 -1.689640  
135 6 0 -10.327304 -3.334256 0.953283  
136 6 0 -9.480302 -3.931558 1.955908  
137 1 0 -8.542689 -3.810060 2.050073  
138 6 0 -16.025677 -3.298548 -1.037478  
139 6 0 -16.848495 -2.798750 -2.111075  
140 1 0 -17.772856 -2.973676 -2.244131  
141 6 0 4.595965 20.094094 -0.341361  
142 1 0 3.974823 20.777956 -0.568279  
143 6 0 4.205884 18.786108 -0.336564  
144 1 0 3.310832 18.557674 -0.551287  
145 6 0 5.175831 15.526730 -1.037988  
146 6 0 6.020879 15.989112 -2.111084  
147 1 0 6.331665 16.877058 -2.244158  
148 8 0 0.467688 3.884599 -0.936206  
149 6 0 1.173071 6.532781 -0.997332  
150 1 0 0.581860 6.198105 -1.663244  
151 6 0 1.551073 7.844247 -1.011025  
152 1 0 1.231105 8.422634 -1.691097  
153 6 0 2.294235 10.610207 0.952007  
154 6 0 1.352708 10.175616 1.954051  
155 1 0 0.989053 9.302896 2.048191  
156 6 0 15.123109 -14.028258 -0.326152  
157 1 0 16.026090 -13.832327 -0.552454  
158 6 0 14.185397 -13.036444 -0.322334  
159 1 0 14.435253 -12.147148 -0.537120  
160 6 0 10.878244 -12.246950 -1.026445  
161 6 0 10.856955 -13.210275 -2.099288  
162 1 0 11.470643 -13.923434 -2.231704  
163 8 0 3.149860 -2.348487 -0.933206  
164 6 0 5.090605 -4.283474 -0.992342  
165 1 0 5.096872 -3.604319 -1.658440  
166 6 0 6.037378 -5.266569 -1.005053  
167 1 0 6.698767 -5.278854 -1.684628  
168 6 0 8.059724 -7.292596 0.960057  
169 6 0 8.153374 -6.259632 1.961881  
170 1 0 7.579333 -5.508311 2.055381  
171 6 0 8.654998 12.069543 -5.064205  
172 1 0 9.604948 12.075766 -5.013873  
173 6 0 7.906550 12.296900 -3.945657  
174 1 0 8.333593 12.470532 -3.116866

175 6 0 5.008717 11.433120 -2.238971  
176 6 0 5.081618 10.089349 -2.757047  
177 1 0 5.590918 9.797825 -3.504290  
178 6 0 0.672976 13.532274 6.346468  
179 1 0 0.935379 13.176864 7.188968  
180 6 0 1.433502 13.301438 5.236817  
181 1 0 2.221481 12.777851 5.302820  
182 6 0 2.618226 14.658634 2.268522  
183 6 0 2.641805 15.974617 2.857651  
184 1 0 2.185373 16.250914 3.643827  
185 6 0 -14.770725 1.439926 -5.067259  
186 1 0 -15.251096 2.259535 -5.017635  
187 6 0 -14.593544 0.678953 -3.948090  
188 1 0 -14.957544 0.962618 -3.119568  
189 6 0 -12.396794 -1.397410 -2.239487  
190 6 0 -11.269437 -0.662798 -2.757995  
191 1 0 -11.271523 -0.076558 -3.505698  
192 6 0 -12.047958 -6.195099 6.349773  
193 1 0 -11.871475 -5.789483 7.191977  
194 6 0 -12.228166 -5.421918 5.239490  
195 1 0 -12.168724 -4.477664 5.304758  
196 6 0 -13.995511 -5.076849 2.270694  
197 6 0 -15.147049 -5.713957 2.860174  
198 1 0 -15.158217 -6.246768 3.646768  
199 6 0 6.147653 -13.532534 -5.055830  
200 1 0 5.678031 -14.358313 -5.005618  
201 6 0 6.717939 -12.997725 -3.937007  
202 1 0 6.654170 -13.454138 -3.108135  
203 6 0 7.417526 -10.055758 -2.230625  
204 6 0 6.217722 -9.447154 -2.749767  
205 1 0 5.711163 -9.742667 -3.497306  
206 6 0 11.396915 -7.348061 6.357024  
207 1 0 10.957291 -7.397369 7.199210  
208 6 0 10.817568 -7.891590 5.247093  
209 1 0 9.970091 -8.312189 5.312582  
210 6 0 11.402786 -9.597023 2.279713  
211 6 0 12.530232 -10.275267 2.869872  
212 1 0 12.997142 -10.017914 3.656326  
213 8 0 3.607569 1.542986 0.914320  
214 6 0 6.253648 2.256249 0.975245  
215 1 0 5.668119 2.601438 1.640809  
216 6 0 7.578410 2.584633 0.988851  
217 1 0 7.919237 3.151463 1.668522  
218 6 0 10.345638 3.322473 -0.974404



219 6 0 9.498637 3.919775 -1.977028  
220 1 0 8.561024 3.798276 -2.071194  
221 6 0 19.709622 6.072074 0.318017  
222 1 0 19.991264 6.952108 0.544281  
223 6 0 18.381833 5.755898 0.313297  
224 1 0 17.736450 6.416989 0.527417  
225 6 0 16.044013 3.286764 1.016359  
226 6 0 16.866830 2.786965 2.089956  
227 1 0 17.791190 2.961894 2.223012  
228 6 0 -4.577630 -20.105878 0.320241  
229 1 0 -3.956489 -20.789740 0.547160  
230 6 0 -4.187551 -18.797890 0.315445  
231 1 0 -3.292497 -18.569457 0.530168  
232 6 0 -5.157496 -15.538515 1.016869  
233 6 0 -6.002543 -16.000895 2.089964  
234 1 0 -6.313331 -16.888841 2.223038  
235 8 0 -0.449341 -3.896406 0.915156  
236 6 0 -1.154738 -6.544564 0.976213  
237 1 0 -0.563525 -6.209889 1.642124  
238 6 0 -1.532737 -7.856029 0.989906  
239 1 0 -1.212770 -8.434419 1.669977  
240 6 0 -2.275901 -10.621991 -0.973127  
241 6 0 -1.334373 -10.187399 -1.975171  
242 1 0 -0.970719 -9.314680 -2.069311  
243 6 0 -15.104773 14.016474 0.305033  
244 1 0 -16.007756 13.820544 0.531333  
245 6 0 -14.167061 13.024660 0.301214  
246 1 0 -14.416919 12.135365 0.516001  
247 6 0 -10.859910 12.235168 1.005326  
248 6 0 -10.838620 13.198491 2.078169  
249 1 0 -11.452309 13.911651 2.210584  
250 8 0 -3.131517 2.336704 0.912065  
251 6 0 -5.072272 4.271691 0.971222  
252 1 0 -5.078537 3.592536 1.637320  
253 6 0 -6.019044 5.254786 0.983933  
254 1 0 -6.680433 5.267070 1.663508  
255 6 0 -8.041390 7.280813 -0.981177  
256 6 0 -8.135038 6.247849 -1.983002  
257 1 0 -7.561000 5.496528 -2.076501  
258 8 0 1.691780 3.532300 0.913110  
259 6 0 2.504051 6.149697 0.972766  
260 1 0 2.826540 5.552033 1.638930  
261 6 0 2.882043 7.461172 0.985746  
262 1 0 3.460861 7.780877 1.665573

263 6 0 3.724736 10.197379 -0.978782  
264 6 0 4.290380 9.327839 -1.980471  
265 1 0 4.133748 8.395402 -2.074120  
266 6 0 6.823923 19.452120 0.309499  
267 1 0 7.713788 19.700598 0.536164  
268 6 0 6.458010 18.137167 0.305413  
269 1 0 7.094211 17.467506 0.520382  
270 6 0 3.902208 15.894374 1.008332  
271 6 0 3.433043 16.736125 2.081074  
272 1 0 3.642544 17.653338 2.213659  
273 8 0 -3.896444 -0.317064 0.912907  
274 6 0 -6.569297 -0.922279 0.972633  
275 1 0 -6.213037 -0.343640 1.638390  
276 6 0 -7.894066 -1.250656 0.985699  
277 1 0 -8.460438 -0.908703 1.665185  
278 6 0 -10.684783 -1.890511 -0.978687  
279 6 0 -10.214432 -0.966666 -1.981042  
280 1 0 -9.328587 -0.636169 -2.074837  
281 6 0 -15.657904 -4.783774 0.842131  
282 6 0 -16.202055 -5.410091 2.083222  
283 1 0 -17.101151 -5.687158 2.215907  
284 8 0 2.231336 -3.231903 0.915645  
285 6 0 4.091887 -5.244040 0.977281  
286 1 0 3.412554 -5.224305 1.642934  
287 6 0 5.038652 -6.227126 0.991244  
288 1 0 5.025607 -6.888059 1.671247  
289 6 0 6.988394 -8.325574 -0.971240  
290 6 0 5.953276 -8.380949 -1.973687  
291 1 0 5.224147 -7.779107 -2.068049  
292 6 0 13.452679 -15.636555 0.323914  
293 1 0 13.222767 -16.531376 0.550659  
294 6 0 12.496856 -14.662190 0.318842  
295 1 0 11.598653 -14.878267 0.533200  
296 6 0 11.831918 -11.327208 1.020329  
297 6 0 12.794678 -11.341474 2.093793  
298 1 0 13.484157 -11.981475 2.227071  
299 6 0 12.404595 8.176097 -5.061726  
300 1 0 12.446527 9.125172 -5.011995  
301 6 0 12.602916 7.420363 -3.942552  
302 1 0 12.791967 7.841117 -3.113919  
303 6 0 11.629621 4.558214 -2.234593  
304 6 0 10.289875 4.681285 -2.753604  
305 1 0 10.018196 5.200700 -3.501363  
306 6 0 13.558675 0.152228 6.354988

307 1 0 13.212856 0.428376 7.197085  
308 6 0 13.357327 0.920169 5.244700  
309 1 0 12.863720 1.727334 5.309856  
310 6 0 14.760030 2.051024 2.276549  
311 6 0 16.075593 2.025456 2.866532  
312 1 0 16.334018 1.559470 3.653182  
313 6 0 -6.633396 -11.817383 6.353354  
314 1 0 -6.221963 -11.655732 7.195711  
315 6 0 -5.866837 -12.027291 5.243694  
316 1 0 -4.921057 -12.003380 5.309549  
317 6 0 -5.586628 -13.808329 2.276253  
318 6 0 -6.266989 -14.934691 2.866045  
319 1 0 -6.800347 -14.925280 3.652294  
320 6 0 0.901029 -14.833059 -5.056899  
321 1 0 1.701950 -15.343895 -5.006426  
322 6 0 0.146550 -14.626628 -3.938345  
323 1 0 0.415791 -15.000496 -3.109405  
324 6 0 -1.846768 -12.352176 -2.232511  
325 6 0 -1.069926 -11.253603 -2.751251  
326 1 0 -0.483703 -11.278240 -3.498567  
327 6 0 -6.903346 11.654269 6.344926  
328 1 0 -6.969696 11.217368 7.187359  
329 6 0 -7.467584 11.095052 5.235004  
330 1 0 -7.919813 10.264044 5.300755  
331 6 0 -9.147900 11.742067 2.266126  
332 6 0 -9.783616 12.894625 2.855121  
333 1 0 -9.509374 13.352041 3.641447  
334 6 0 -13.273701 6.633897 -5.068670  
335 1 0 -14.116596 6.195712 -5.018705  
336 6 0 -12.718521 7.184395 -3.949857  
337 1 0 -13.177537 7.138392 -3.121246  
338 6 0 -9.753400 7.773912 -2.241977  
339 6 0 -9.190043 6.551715 -2.759954  
340 1 0 -9.503934 6.056139 -3.507365  
341 40 0 -1.458291 -1.420030 -1.421992  
342 8 0 -1.447463 -1.408150 0.859825  
343 40 0 1.967760 -0.570787 -1.421293  
344 8 0 1.951690 -0.565534 0.860403  
345 40 0 -0.480731 1.971637 -1.422912  
346 8 0 -0.477539 1.956902 0.858816  
347 40 0 1.476717 1.408161 1.400893  
348 8 0 1.465745 1.396356 -0.880874  
349 40 0 0.499440 -1.983224 1.401527  
350 8 0 0.495810 -1.968716 -0.879960

351 40 0 -1.949257 0.559229 1.399909  
352 8 0 -1.933402 0.553689 -0.881566  
353 29 0 -3.755919 -13.068956 -0.007013  
354 29 0 13.204656 3.264983 -0.007872  
355 29 0 -9.421236 9.786299 -0.016794  
356 29 0 -13.186321 -3.276766 -0.013248  
357 29 0 3.774252 13.057173 -0.014107  
358 29 0 9.439571 -9.798082 -0.004325  
359 8 0 0.009802 -0.006666 -2.184456  
360 8 0 0.008066 -0.005343 2.163649  
361 7 0 -4.154106 -11.486143 1.139388  
362 7 0 -3.369810 -14.648292 -1.162309  
363 7 0 12.032844 2.129636 1.139269  
364 7 0 14.379496 4.388122 -1.163900  
365 7 0 -7.852240 9.340055 1.130901  
366 7 0 -10.981173 10.241262 -1.173382  
367 7 0 -11.620341 -3.733473 1.134452  
368 7 0 -14.749274 -2.832266 -1.169832  
369 7 0 4.941539 14.188155 -1.170140  
370 7 0 2.594886 11.929670 1.133029  
371 7 0 9.836249 -11.374797 -1.159619  
372 7 0 9.051953 -8.212648 1.142077  
373 7 0 4.172441 11.474358 -1.160508  
374 7 0 3.388144 14.636507 1.141189  
375 7 0 -12.014509 -2.141419 -1.160389  
376 7 0 -14.361162 -4.399905 1.142780  
377 7 0 7.870575 -9.351838 -1.152021  
378 7 0 10.999507 -10.253046 1.152263  
379 7 0 11.638676 3.721691 -1.155572  
380 7 0 14.767607 2.820483 1.148713  
381 7 0 -4.923204 -14.199938 1.149021  
382 7 0 -2.576553 -11.941452 -1.154149  
383 7 0 -9.817913 11.363013 1.138500  
384 7 0 -9.033617 8.200864 -1.163197  
385 6 0 -1.223836 -4.283832 -0.009398  
386 6 0 -1.635869 -5.713390 -0.009009  
387 6 0 -2.396289 -8.351686 -0.008294  
388 6 0 -2.805618 -9.771868 -0.007908  
389 6 0 -5.875966 -20.424523 -0.005015  
390 6 0 -5.115547 -17.786227 -0.005731  
391 6 0 -4.706217 -16.366044 -0.006117  
392 6 0 4.330473 1.065266 -0.009680  
393 6 0 5.774524 1.423215 -0.009386  
394 6 0 8.439565 2.083821 -0.008843

395 6 0 9.874144 2.439422 -0.008551  
396 6 0 20.634788 5.106751 -0.006360  
397 6 0 17.969746 4.446145 -0.006902  
398 6 0 16.535167 4.090544 -0.007195  
399 6 0 -3.079135 3.200890 -0.012601  
400 6 0 -4.111153 4.272501 -0.013283  
401 6 0 -6.015774 6.250190 -0.014543  
402 6 0 -7.041023 7.314771 -0.015221  
403 6 0 -14.731319 15.300098 -0.020305  
404 6 0 -12.826697 13.322407 -0.019046  
405 6 0 -11.801448 12.257827 -0.018368  
406 6 0 -12.124800 -7.564331 6.238867  
407 6 0 -12.505546 -6.026467 3.996358  
408 6 0 -12.710500 -5.198641 2.789225  
409 6 0 -14.247842 1.010800 -6.265361  
410 6 0 -13.867095 -0.527065 -4.022852  
411 6 0 -13.662142 -1.354890 -2.815720  
412 6 0 8.022814 11.830940 -6.262711  
413 6 0 6.498940 12.270764 -4.021461  
414 6 0 5.678645 12.507522 -2.815006  
415 6 0 -0.474310 14.283407 6.234496  
416 6 0 1.049565 13.843581 3.993246  
417 6 0 1.869859 13.606825 2.786792  
418 6 0 6.258001 -12.866084 -6.254441  
419 6 0 7.399167 -11.765652 -4.012648  
420 6 0 8.013451 -11.173294 -2.805903  
421 6 0 12.621141 -6.730081 6.245791  
422 6 0 11.479974 -7.830512 4.003998  
423 6 0 10.865690 -8.422869 2.797252  
424 6 0 -8.004481 -11.842723 6.241591  
425 6 0 -6.480605 -12.282549 4.000341  
426 6 0 -5.660311 -12.519305 2.793886  
427 6 0 0.492644 -14.295190 -6.255616  
428 6 0 -1.031231 -13.855364 -4.014365  
429 6 0 -1.851525 -13.618609 -2.807911  
430 6 0 14.266176 -1.022582 6.244241  
431 6 0 13.885430 0.515281 4.001732  
432 6 0 13.680476 1.343106 2.794599  
433 6 0 12.143134 7.552547 -6.259987  
434 6 0 12.523881 6.014683 -4.017477  
435 6 0 12.728836 5.186858 -2.810345  
436 6 0 -6.239667 12.854300 6.233322  
437 6 0 -7.380832 11.753869 3.991529  
438 6 0 -7.995116 11.161514 2.784783

439 6 0 -12.602806 6.718298 -6.266910  
440 6 0 -11.461640 7.818729 -4.025117  
441 6 0 -10.847355 8.411086 -2.818371  
442 6 0 -4.312139 -1.077050 -0.011440  
443 6 0 -5.756190 -1.434998 -0.011734  
444 6 0 -8.421230 -2.095604 -0.012276  
445 6 0 -9.855809 -2.451205 -0.012568  
446 6 0 -16.516832 -4.102327 -0.013925  
447 6 0 5.894301 20.412740 -0.016105  
448 6 0 5.133881 17.774444 -0.015388  
449 6 0 4.724551 16.354262 -0.015003  
450 6 0 1.242171 4.272047 -0.011722  
451 6 0 1.654204 5.701607 -0.012109  
452 6 0 2.414623 8.339903 -0.012826  
453 6 0 2.823953 9.760084 -0.013212  
454 6 0 14.749653 -15.311881 -0.000815  
455 6 0 12.845032 -13.334190 -0.002074  
456 6 0 11.819783 -12.269608 -0.002751  
457 6 0 3.097469 -3.212674 -0.008518  
458 6 0 4.129489 -4.284283 -0.007836  
459 6 0 6.034109 -6.261973 -0.006577  
460 6 0 7.059359 -7.326555 -0.005898  
461 1 0 15.491887 -16.082589 -0.000324  
462 1 0 5.868496 -13.233466 -7.040390  
463 1 0 13.065854 -6.301242 7.119420  
464 1 0 -8.532290 -11.690385 7.017871  
465 1 0 -6.139345 -21.338324 -0.004767  
466 1 0 1.008946 -14.438043 -7.041380  
467 1 0 -11.992925 -8.096986 7.015583  
468 6 0 -18.011597 -4.472846 -0.014229  
469 6 0 -18.431321 -5.678240 -0.577548  
470 6 0 -18.945827 -3.603462 0.548738  
471 6 0 -19.785068 -6.013784 -0.578458  
472 1 0 -17.794019 -6.270685 -0.962028  
473 6 0 -20.299913 -3.939410 0.548790  
474 1 0 -18.659767 -2.781590 0.933015  
475 6 0 -20.719665 -5.144280 -0.014800  
476 1 0 -20.071389 -6.835427 -0.963030  
477 1 0 -20.936839 -3.346466 0.933123  
478 1 0 -21.642972 -5.373357 -0.015476  
479 1 0 -14.379717 1.543456 -7.042077  
480 1 0 -12.998060 6.337151 -7.043379  
481 1 0 -15.391004 15.985092 -0.020741  
482 1 0 -5.844411 13.235445 7.009790

483 1 0 -1.002120 14.435744 7.010776  
 484 1 0 6.157680 21.326541 -0.016353  
 485 1 0 8.550624 11.678601 -7.038990  
 486 1 0 12.011259 8.085203 -7.036703  
 487 1 0 21.557852 5.335558 -0.006172  
 488 1 0 14.398052 -1.555239 7.020958  
 489 6 0 -2.630895 2.139022 3.524851  
 490 1 0 -3.441789 1.503929 3.332855  
 491 1 0 -1.694127 2.404261 3.120489

Zr<sub>6</sub>O<sub>8</sub>(TCPP-Cu)<sub>6</sub>--CH<sub>2</sub>

-----  
 Center Atomic Atomic Coordinates (Angstroms)

Number Number Type X Y Z

-----

|    |   |   |           |           |           |
|----|---|---|-----------|-----------|-----------|
| 1  | 8 | 0 | -2.039847 | 3.319715  | 0.924163  |
| 2  | 6 | 0 | -3.149607 | 5.825505  | 0.984337  |
| 3  | 1 | 0 | -3.400986 | 5.194309  | 1.650203  |
| 4  | 6 | 0 | -3.676843 | 7.084418  | 0.997567  |
| 5  | 1 | 0 | -4.289001 | 7.334757  | 1.677274  |
| 6  | 6 | 0 | -4.829877 | 9.705381  | -0.966458 |
| 7  | 6 | 0 | -5.290752 | 8.776561  | -1.968618 |
| 8  | 1 | 0 | -5.027226 | 7.868548  | -2.062487 |
| 9  | 6 | 0 | -8.979732 | 18.538827 | 0.323424  |
| 10 | 1 | 0 | -9.892449 | 18.682572 | 0.549832  |
| 11 | 6 | 0 | -8.464095 | 17.275057 | 0.319084  |
| 12 | 1 | 0 | -9.018593 | 16.536195 | 0.533614  |
| 13 | 6 | 0 | -5.666143 | 15.342882 | 1.022287  |
| 14 | 6 | 0 | -5.297908 | 16.232910 | 2.095456  |
| 15 | 1 | 0 | -5.612196 | 17.119667 | 2.228234  |
| 16 | 8 | 0 | 3.956272  | 0.142929  | 0.924839  |
| 17 | 6 | 0 | 6.681220  | -0.148886 | 0.985482  |
| 18 | 1 | 0 | 6.260161  | 0.384409  | 1.651278  |
| 19 | 6 | 0 | 8.035085  | -0.321743 | 0.998945  |
| 20 | 1 | 0 | 8.557848  | 0.083229  | 1.678744  |
| 21 | 6 | 0 | 10.881761 | -0.633659 | -0.964590 |
| 22 | 6 | 0 | 10.307990 | 0.229885  | -1.966846 |
| 23 | 1 | 0 | 9.389881  | 0.455673  | -2.060872 |
| 24 | 6 | 0 | 20.606456 | -1.456508 | 0.326966  |
| 25 | 1 | 0 | 21.187261 | -0.737945 | 0.553478  |
| 26 | 6 | 0 | 19.254181 | -1.271177 | 0.322394  |
| 27 | 1 | 0 | 18.891520 | -0.421538 | 0.536865  |
| 28 | 6 | 0 | 16.181772 | -2.728191 | 1.025061  |
| 29 | 6 | 0 | 16.768256 | -3.492110 | 2.098327  |

30 1 0 17.693330 -3.663308 2.231265  
31 8 0 -1.792966 -3.461469 0.924508  
32 6 0 -3.408169 -5.675435 0.984863  
33 1 0 -2.735908 -5.577440 1.650775  
34 6 0 -4.234802 -6.761489 0.998179  
35 1 0 -4.145585 -7.416703 1.677990  
36 6 0 -5.927929 -9.070817 -0.965658  
37 6 0 -4.893020 -9.005684 -1.967735  
38 1 0 -4.238411 -8.323472 -2.061646  
39 6 0 -11.503106 -17.081230 0.324903  
40 1 0 -11.171255 -17.943506 0.551467  
41 6 0 -10.666468 -16.002791 0.320479  
42 1 0 -9.749365 -16.113538 0.535108  
43 6 0 -10.392195 -12.613504 1.023207  
44 6 0 -11.347196 -12.739457 2.096309  
45 1 0 -11.958018 -13.454998 2.229138  
46 6 0 -13.216115 6.694538 -5.053244  
47 1 0 -13.367619 7.632368 -5.003246  
48 6 0 -13.326018 5.920551 -3.934370  
49 1 0 -13.562770 6.316318 -3.105681  
50 6 0 -12.028596 3.189694 -2.226901  
51 6 0 -10.711922 3.467165 -2.745375  
52 1 0 -10.501929 4.014786 -3.492879  
53 6 0 -13.437668 -1.412852 6.360645  
54 1 0 -13.126415 -1.098823 7.202954  
55 6 0 -13.326173 -0.626391 5.250661  
56 1 0 -12.929319 0.232454 5.316242  
57 6 0 -14.849328 0.335535 2.282325  
58 6 0 -16.153290 0.157689 2.871809  
59 1 0 -16.356315 -0.335341 3.658224  
60 6 0 8.003980 -10.965187 6.362976  
61 1 0 7.576321 -10.852524 7.205230  
62 6 0 7.267238 -11.262023 5.252970  
63 1 0 6.325024 -11.347750 5.318479  
64 6 0 7.196029 -13.062515 2.284892  
65 6 0 8.001977 -14.102769 2.874602  
66 1 0 8.530395 -14.031964 3.661054  
67 6 0 0.873024 -14.828692 -5.050985  
68 1 0 0.136588 -15.428806 -5.000965  
69 6 0 1.598167 -14.536712 -3.932089  
70 1 0 1.373725 -14.939508 -3.103360  
71 6 0 3.314293 -12.047434 -2.224832  
72 6 0 2.415707 -11.045971 -2.743535  
73 1 0 1.836525 -11.138033 -3.491076



74 6 0 5.555721 12.379993 6.361649  
75 1 0 5.671906 11.953421 7.203976  
76 6 0 6.181260 11.890210 5.251771  
77 1 0 6.726603 11.117100 5.317443  
78 6 0 7.776402 12.728350 2.283713  
79 6 0 8.274262 13.946535 2.873288  
80 1 0 7.948662 14.368871 3.659649  
81 6 0 12.468119 8.134475 -5.051066  
82 1 0 13.356046 7.796766 -5.000916  
83 6 0 11.852585 8.616641 -3.932296  
84 1 0 12.313562 8.623789 -3.103527  
85 6 0 8.838588 8.858463 -2.225346  
86 6 0 8.420638 7.579455 -2.743898  
87 1 0 8.790024 7.123791 -3.491339  
88 6 0 -9.942303 10.995769 -5.053163  
89 1 0 -10.886606 10.891993 -5.003184  
90 6 0 -9.225573 11.307836 -3.934268  
91 1 0 -9.670120 11.430599 -3.105584  
92 6 0 -6.247821 10.784649 -2.226758  
93 6 0 -6.164542 9.441647 -2.745263  
94 1 0 -6.636431 9.093393 -3.492783  
95 6 0 -2.187036 13.368563 6.360924  
96 1 0 -2.406828 12.984888 7.203220  
97 6 0 -2.915365 13.051639 5.250920  
98 1 0 -3.637474 12.440354 5.316473  
99 6 0 -4.248200 14.263615 2.282588  
100 6 0 -4.424118 15.567824 2.872100  
101 1 0 -4.002993 15.894822 3.658530  
102 6 0 14.556188 3.148656 -5.050646  
103 1 0 14.938460 4.018333 -5.000597  
104 6 0 14.467889 2.371910 -3.931769  
105 1 0 14.796334 2.695514 -3.103027  
106 6 0 12.525624 0.054687 -2.224604  
107 6 0 11.321001 0.654070 -2.743314  
108 1 0 11.255477 1.236867 -3.490843  
109 6 0 12.731486 -4.754049 6.363094  
110 1 0 12.508964 -4.371868 7.205352  
111 6 0 12.821377 -3.964831 5.253108  
112 1 0 12.653032 -3.033823 5.318636  
113 6 0 14.537907 -3.416537 2.285074  
114 6 0 15.755245 -3.916295 2.874795  
115 1 0 15.827734 -4.444501 3.661235  
116 6 0 -4.488856 -14.144104 -5.051487  
117 1 0 -3.926837 -14.910000 -5.001345

118 6 0 -5.117581 -13.679267 -3.932717  
119 1 0 -5.001697 -14.125514 -3.103957  
120 6 0 -6.153518 -10.838612 -2.225718  
121 6 0 -5.032035 -10.095066 -2.744232  
122 1 0 -4.494428 -10.329718 -3.491669  
123 6 0 -10.422418 -8.612562 6.361252  
124 1 0 -9.980325 -8.610945 7.203587  
125 6 0 -9.783688 -9.085014 5.251375  
126 1 0 -8.893252 -9.404728 5.317055  
127 6 0 -10.166605 -10.845708 2.283268  
128 6 0 -11.208179 -11.650075 2.872805  
129 1 0 -11.702000 -11.448753 3.659161  
130 8 0 -3.712556 1.122061 0.924121  
131 6 0 -6.423419 1.524274 0.984256  
132 1 0 -5.881997 1.934683 1.650141  
133 6 0 -7.777287 1.697133 0.997466  
134 1 0 -8.181652 2.220477 1.677177  
135 6 0 -10.610652 2.110426 -0.966601  
136 6 0 -9.838131 2.802079 -1.968731  
137 1 0 -8.892726 2.789940 -2.062583  
138 6 0 -16.267272 1.414805 1.022024  
139 6 0 -17.027080 0.822775 2.095165  
140 1 0 -17.965518 0.889504 2.227928  
141 6 0 6.923291 -19.433855 0.326627  
142 1 0 6.385390 -20.185084 0.553110  
143 6 0 6.384458 -18.179801 0.322074  
144 1 0 5.468910 -18.056561 0.536532  
145 6 0 6.970440 -14.830310 1.024832  
146 6 0 7.862961 -15.192151 2.098106  
147 1 0 8.274377 -16.038208 2.231031  
148 8 0 0.946613 -3.811250 0.924764  
149 6 0 1.953712 -6.360024 0.985364  
150 1 0 1.327517 -6.096245 1.651155  
151 6 0 2.480947 -7.618936 0.998807  
152 1 0 2.229838 -8.230698 1.678587  
153 6 0 3.539882 -10.279637 -0.964772  
154 6 0 2.554723 -9.956590 -1.967038  
155 1 0 2.092542 -9.131788 -2.061053  
156 6 0 13.430690 15.677533 0.325521  
157 1 0 14.350203 15.587345 0.552101  
158 6 0 12.614064 14.583863 0.321057  
159 1 0 12.965088 13.729386 0.535671  
160 6 0 9.420265 13.416696 1.023699  
161 6 0 9.287272 14.370720 2.096821

162 1 0 9.814258 15.150065 2.229678  
163 8 0 2.889402 2.690364 0.924624  
164 6 0 4.593149 4.836933 0.985061  
165 1 0 4.677748 4.162841 1.650959  
166 6 0 5.419780 5.922989 0.998419  
167 1 0 6.075076 6.011504 1.678244  
168 6 0 7.194725 8.170117 -0.965333  
169 6 0 7.407627 7.155272 -1.967430  
170 1 0 6.924427 6.342597 -2.061368  
171 6 0 10.024772 -10.995073 5.053378  
172 1 0 10.969076 -10.891298 5.003399  
173 6 0 9.308042 -11.307141 3.934483  
174 1 0 9.752588 -11.429903 3.105799  
175 6 0 6.330288 -10.783954 2.226973  
176 6 0 6.247010 -9.440952 2.745477  
177 1 0 6.718898 -9.092698 3.492997  
178 6 0 2.269504 -13.367868 -6.360709  
179 1 0 2.489295 -12.984193 -7.203005  
180 6 0 2.997832 -13.050943 -5.250705  
181 1 0 3.719943 -12.439659 -5.316258  
182 6 0 4.330667 -14.262918 -2.282373  
183 6 0 4.506585 -15.567130 -2.871885  
184 1 0 4.085461 -15.894127 -3.658315  
185 6 0 -14.473720 -3.147960 5.050860  
186 1 0 -14.855991 -4.017638 5.000812  
187 6 0 -14.385420 -2.371215 3.931984  
188 1 0 -14.713867 -2.694819 3.103242  
189 6 0 -12.443157 -0.053992 2.224819  
190 6 0 -11.238532 -0.653374 2.743529  
191 1 0 -11.173010 -1.236171 3.491057  
192 6 0 -12.649018 4.754745 -6.362879  
193 1 0 -12.426496 4.372565 -7.205138  
194 6 0 -12.738908 3.965526 -5.252893  
195 1 0 -12.570565 3.034518 -5.318421  
196 6 0 -14.455440 3.417232 -2.284860  
197 6 0 -15.672776 3.916991 -2.874580  
198 1 0 -15.745266 4.445197 -3.661020  
199 6 0 4.571325 14.144799 5.051702  
200 1 0 4.009307 14.910695 5.001560  
201 6 0 5.200049 13.679962 3.932932  
202 1 0 5.084166 14.126210 3.104172  
203 6 0 6.235986 10.839307 2.225933  
204 6 0 5.114504 10.095762 2.744446  
205 1 0 4.576897 10.330412 3.491884

206 6 0 10.504886 8.613256 -6.361037  
207 1 0 10.062793 8.611641 -7.203372  
208 6 0 9.866156 9.085708 -5.251160  
209 1 0 8.975720 9.405423 -5.316840  
210 6 0 10.249073 10.846402 -2.283053  
211 6 0 11.290648 11.650770 -2.872590  
212 1 0 11.784468 11.449449 -3.658946  
213 8 0 3.795024 -1.121366 -0.923905  
214 6 0 6.505886 -1.523579 -0.984041  
215 1 0 5.964464 -1.933988 -1.649927  
216 6 0 7.859756 -1.696437 -0.997251  
217 1 0 8.264120 -2.219782 -1.676963  
218 6 0 10.693120 -2.109731 0.966816  
219 6 0 9.920599 -2.801384 1.968946  
220 1 0 8.975194 -2.789244 2.062798  
221 6 0 20.312832 -3.756716 -0.322930  
222 1 0 20.694505 -4.598165 -0.549351  
223 6 0 18.957373 -3.596332 -0.318611  
224 1 0 18.392906 -4.327599 -0.533169  
225 6 0 16.349741 -1.414109 -1.021809  
226 6 0 17.109548 -0.822079 -2.094950  
227 1 0 18.047987 -0.888809 -2.227713  
228 6 0 -6.840822 19.434551 -0.326412  
229 1 0 -6.302922 20.185780 -0.552895  
230 6 0 -6.301991 18.180496 -0.321860  
231 1 0 -5.386442 18.057256 -0.536317  
232 6 0 -6.887972 14.831006 -1.024617  
233 6 0 -7.780492 15.192846 -2.097891  
234 1 0 -8.191909 16.038903 -2.230816  
235 8 0 -0.864145 3.811946 -0.924549  
236 6 0 -1.871245 6.360718 -0.985150  
237 1 0 -1.245050 6.096940 -1.650940  
238 6 0 -2.398477 7.619630 -0.998593  
239 1 0 -2.147370 8.231394 -1.678372  
240 6 0 -3.457415 10.280333 0.964987  
241 6 0 -2.472255 9.957285 1.967253  
242 1 0 -2.010074 9.132485 2.061268  
243 6 0 -13.348222 -15.676837 -0.325307  
244 1 0 -14.267735 -15.586650 -0.551886  
245 6 0 -12.531595 -14.583167 -0.320842  
246 1 0 -12.882621 -13.728691 -0.535457  
247 6 0 -9.337798 -13.416001 -1.023484  
248 6 0 -9.204805 -14.370024 -2.096606  
249 1 0 -9.731790 -15.149369 -2.229463

250 8 0 -2.806933 -2.689669 -0.924407  
251 6 0 -4.510681 -4.836238 -0.984846  
252 1 0 -4.595280 -4.162146 -1.650744  
253 6 0 -5.337313 -5.922293 -0.998204  
254 1 0 -5.992608 -6.010808 -1.678029  
255 6 0 -7.112257 -8.169421 0.965547  
256 6 0 -7.325159 -7.154576 1.967645  
257 1 0 -6.841960 -6.341902 2.061583  
258 8 0 2.122315 -3.319019 -0.923948  
259 6 0 3.232076 -5.824810 -0.984122  
260 1 0 3.483454 -5.193614 -1.649988  
261 6 0 3.759311 -7.083723 -0.997353  
262 1 0 4.371468 -7.334062 -1.677059  
263 6 0 4.912345 -9.704686 0.966673  
264 6 0 5.373219 -8.775866 1.968833  
265 1 0 5.109695 -7.867853 2.062702  
266 6 0 9.062200 -18.538131 -0.323210  
267 1 0 9.974918 -18.681877 -0.549617  
268 6 0 8.546564 -17.274362 -0.318869  
269 1 0 9.101062 -16.535500 -0.533400  
270 6 0 5.748611 -15.342187 -1.022073  
271 6 0 5.380375 -16.232215 -2.095241  
272 1 0 5.694664 -17.118972 -2.228020  
273 8 0 -3.873804 -0.142233 -0.924623  
274 6 0 -6.598750 0.149580 -0.985267  
275 1 0 -6.177694 -0.383715 -1.651063  
276 6 0 -7.952617 0.322438 -0.998730  
277 1 0 -8.475379 -0.082534 -1.678529  
278 6 0 -10.799294 0.634355 0.964805  
279 6 0 -10.225522 -0.229189 1.967061  
280 1 0 -9.307413 -0.454977 2.061087  
281 6 0 -16.073225 2.933251 -0.857005  
282 6 0 -16.685787 3.492806 -2.098112  
283 1 0 -17.610862 3.664003 -2.231050  
284 8 0 1.875434 3.462164 -0.924291  
285 6 0 3.490636 5.676131 -0.984648  
286 1 0 2.818376 5.578135 -1.650560  
287 6 0 4.317270 6.762185 -0.997964  
288 1 0 4.228052 7.417399 -1.677775  
289 6 0 6.010397 9.071512 0.965873  
290 6 0 4.975488 9.006380 1.967950  
291 1 0 4.320879 8.324167 2.061860  
292 6 0 11.585574 17.081925 -0.324688  
293 1 0 11.253724 17.944202 -0.551253

294 6 0 10.748936 16.003487 -0.320264  
295 1 0 9.831833 16.114234 -0.534893  
296 6 0 10.474662 12.614198 -1.022993  
297 6 0 11.429663 12.740152 -2.096094  
298 1 0 12.040486 13.455693 -2.228923  
299 6 0 13.298582 -6.693843 5.053459  
300 1 0 13.450086 -7.631671 5.003461  
301 6 0 13.408486 -5.919856 3.934585  
302 1 0 13.645239 -6.315622 3.105896  
303 6 0 12.111065 -3.189000 2.227116  
304 6 0 10.794390 -3.466470 2.745590  
305 1 0 10.584398 -4.014090 3.493093  
306 6 0 13.520136 1.413547 -6.360430  
307 1 0 13.208882 1.099519 -7.202739  
308 6 0 13.408642 0.627087 -5.250447  
309 1 0 13.011787 -0.231758 -5.316027  
310 6 0 14.931796 -0.334840 -2.282110  
311 6 0 16.235759 -0.156993 -2.871594  
312 1 0 16.438783 0.336037 -3.658009  
313 6 0 -7.921511 10.965882 -6.362762  
314 1 0 -7.493851 10.853219 -7.205015  
315 6 0 -7.184769 11.262718 -5.252755  
316 1 0 -6.242554 11.348446 -5.318264  
317 6 0 -7.113561 13.063210 -2.284677  
318 6 0 -7.919508 14.103465 -2.874388  
319 1 0 -8.447928 14.032658 -3.660839  
320 6 0 -0.790556 14.829389 5.051200  
321 1 0 -0.054119 15.429500 5.001179  
322 6 0 -1.515698 14.537408 3.932303  
323 1 0 -1.291256 14.940205 3.103575  
324 6 0 -3.231825 12.048129 2.225047  
325 6 0 -2.333238 11.046666 2.743750  
326 1 0 -1.754056 11.138729 3.491291  
327 6 0 -5.473252 -12.379297 -6.361434  
328 1 0 -5.589437 -11.952725 -7.203761  
329 6 0 -6.098791 -11.889514 -5.251556  
330 1 0 -6.644133 -11.116405 -5.317228  
331 6 0 -7.693934 -12.727654 -2.283498  
332 6 0 -8.191794 -13.945839 -2.873074  
333 1 0 -7.866194 -14.368175 -3.659434  
334 6 0 -12.385651 -8.133780 5.051281  
335 1 0 -13.273578 -7.796071 5.001131  
336 6 0 -11.770117 -8.615947 3.932511  
337 1 0 -12.231094 -8.623094 3.103742

338 6 0 -8.756120 -8.857768 2.225561  
339 6 0 -8.338169 -7.578760 2.744113  
340 1 0 -8.707555 -7.123095 3.491554  
341 40 0 -1.580498 1.234675 1.411413  
342 8 0 -1.567564 1.224875 -0.870333  
343 40 0 1.920815 0.787638 1.411740  
344 8 0 1.906254 0.781347 -0.870006  
345 40 0 -0.216986 -2.021069 1.411687  
346 8 0 -0.214759 -2.005304 -0.870059  
347 40 0 1.662964 -1.233984 -1.411201  
348 8 0 1.650032 -1.224180 0.870547  
349 40 0 0.299447 2.021765 -1.411471  
350 8 0 0.297227 2.005999 0.870274  
351 40 0 -1.838347 -0.786939 -1.411519  
352 8 0 -1.823786 -0.780652 0.870222  
353 29 0 -5.210352 12.539900 -0.000950  
354 29 0 13.526598 -1.721422 0.001369  
355 29 0 -8.192544 -10.817435 -0.000097  
356 29 0 -13.444130 1.722117 -0.001154  
357 29 0 5.292820 -12.539205 0.001165  
358 29 0 8.275012 10.818131 0.000312  
359 8 0 0.041044 0.000452 2.174004  
360 8 0 0.041435 0.000243 -2.173795  
361 7 0 -5.422298 10.922029 -1.147971  
362 7 0 -5.010004 14.152917 1.154961  
363 7 0 12.231651 -0.728930 -1.145871  
364 7 0 14.823137 -2.701441 1.157500  
365 7 0 -6.685350 -10.192219 -1.147074  
366 7 0 -9.689735 -11.450267 1.155773  
367 7 0 -11.941142 2.357377 -1.148133  
368 7 0 -14.945527 1.099330 1.154715  
369 7 0 6.582764 -13.527889 1.157296  
370 7 0 3.991277 -11.555377 -1.146075  
371 7 0 8.486162 12.429767 1.156224  
372 7 0 8.073868 9.198880 -1.146708  
373 7 0 5.504767 -10.921333 1.148186  
374 7 0 5.092472 -14.152220 -1.154746  
375 7 0 -12.149182 0.729625 1.146086  
376 7 0 -14.740670 2.702137 -1.157285  
377 7 0 6.767818 10.192914 1.147289  
378 7 0 9.772203 11.450962 -1.155558  
379 7 0 12.023610 -2.356683 1.148348  
380 7 0 15.027995 -1.098635 -1.154500  
381 7 0 -6.500295 13.528584 -1.157081

382 7 0 -3.908809 11.556073 1.146290  
383 7 0 -8.403693 -12.429071 -1.156009  
384 7 0 -7.991400 -9.198184 1.146923  
385 6 0 -1.678574 4.106846 -0.000239  
386 6 0 -2.253282 5.479114 -0.000355  
387 6 0 -3.313925 8.011678 -0.000568  
388 6 0 -3.884862 9.374945 -0.000683  
389 6 0 -8.167421 19.600688 -0.001546  
390 6 0 -7.106779 17.068123 -0.001332  
391 6 0 -6.535840 15.704855 -0.001217  
392 6 0 4.457469 -0.563504 0.000521  
393 6 0 5.933243 -0.751926 0.000659  
394 6 0 8.656829 -1.099665 0.000914  
395 6 0 10.122922 -1.286851 0.001051  
396 6 0 21.119954 -2.690919 0.002080  
397 6 0 18.396367 -2.343179 0.001825  
398 6 0 16.930274 -2.155993 0.001688  
399 6 0 -2.655194 -3.542298 0.000040  
400 6 0 -3.556259 -4.726145 0.000018  
401 6 0 -5.219202 -6.910970 -0.000023  
402 6 0 -6.114357 -8.087050 -0.000045  
403 6 0 -12.828831 -16.908726 -0.000212  
404 6 0 -11.165887 -14.723900 -0.000171  
405 6 0 -10.270732 -13.547820 -0.000149  
406 6 0 -12.883845 6.105845 -6.251593  
407 6 0 -13.084807 4.533489 -4.009685  
408 6 0 -13.192985 3.687098 -2.802876  
409 6 0 -14.004416 -2.661610 6.249284  
410 6 0 -13.803452 -1.089254 4.007376  
411 6 0 -13.695275 -0.242862 2.800567  
412 6 0 9.368820 -10.831642 6.251719  
413 6 0 7.906839 -11.444110 4.009769  
414 6 0 7.119862 -11.773800 2.802938  
415 6 0 1.216819 -14.246769 -6.249389  
416 6 0 2.678800 -13.634299 -4.007439  
417 6 0 3.465776 -13.304610 -2.800608  
418 6 0 4.757658 13.495191 6.250155  
419 6 0 6.019264 12.534983 4.008460  
420 6 0 6.698380 12.018106 2.801767  
421 6 0 11.792368 8.141071 -6.249531  
422 6 0 10.530762 9.101280 -4.007836  
423 6 0 9.851646 9.618155 -2.801143  
424 6 0 -9.286352 10.832338 -6.251504  
425 6 0 -7.824371 11.444807 -4.009554



426 6 0 -7.037395 11.774496 -2.802723  
427 6 0 -1.134352 14.247463 6.249604  
428 6 0 -2.596332 13.634995 4.007654  
429 6 0 -3.383309 13.305306 2.800823  
430 6 0 14.086884 2.662305 -6.249069  
431 6 0 13.885921 1.089950 -4.007161  
432 6 0 13.777743 0.243558 -2.800352  
433 6 0 12.966312 -6.105149 6.251808  
434 6 0 13.167276 -4.532793 4.009899  
435 6 0 13.275454 -3.686402 2.803091  
436 6 0 -4.675190 -13.494494 -6.249940  
437 6 0 -5.936795 -12.534287 -4.008245  
438 6 0 -6.615910 -12.017412 -2.801552  
439 6 0 -11.709900 -8.140376 6.249746  
440 6 0 -10.448295 -9.100584 4.008051  
441 6 0 -9.769177 -9.617460 2.801358  
442 6 0 -4.375002 0.564199 -0.000306  
443 6 0 -5.850775 0.752621 -0.000444  
444 6 0 -8.574361 1.100361 -0.000699  
445 6 0 -10.040454 1.287546 -0.000836  
446 6 0 -16.847806 2.156688 -0.001473  
447 6 0 8.249889 -19.599993 0.001760  
448 6 0 7.189246 -17.067428 0.001547  
449 6 0 6.618308 -15.704161 0.001432  
450 6 0 1.761042 -4.106150 0.000454  
451 6 0 2.335750 -5.478419 0.000569  
452 6 0 3.396392 -8.010982 0.000783  
453 6 0 3.967331 -9.374249 0.000898  
454 6 0 12.911299 16.909422 0.000427  
455 6 0 11.248355 14.724596 0.000386  
456 6 0 10.353200 13.548514 0.000363  
457 6 0 2.737661 3.542995 0.000174  
458 6 0 3.638727 4.726840 0.000197  
459 6 0 5.301671 6.911665 0.000238  
460 6 0 6.196825 8.087746 0.000260  
461 1 0 13.559350 17.760850 0.000443  
462 1 0 4.327987 13.814760 7.036068  
463 1 0 12.284016 7.766878 -7.123122  
464 1 0 -9.792724 10.620203 -7.028026  
465 1 0 -8.534785 20.477868 -0.001620  
466 1 0 -0.638315 14.448842 7.035603  
467 1 0 -12.814239 6.650447 -7.028101  
468 6 0 -18.375406 2.351728 -0.001616  
469 6 0 -18.932001 3.500256 0.561905

470 6 0 -19.202555 1.380257 -0.565191  
 471 6 0 -20.315485 3.676874 0.562410  
 472 1 0 -18.367675 4.162345 0.946800  
 473 6 0 -20.586422 1.557238 -0.565648  
 474 1 0 -18.823172 0.597144 -0.949606  
 475 6 0 -21.142984 2.705243 -0.001856  
 476 1 0 -20.695100 4.459729 0.947120  
 477 1 0 -21.150317 0.894697 -0.950396  
 478 1 0 -22.086598 2.825924 -0.001456  
 479 1 0 -14.074022 -3.206212 7.025792  
 480 1 0 -12.146870 -7.807797 7.026180  
 481 1 0 -13.404809 -17.665464 -0.000226  
 482 1 0 -4.238219 -13.827072 -7.026374  
 483 1 0 0.710447 -14.458902 -7.025911  
 484 1 0 8.617254 -20.477172 0.001834  
 485 1 0 9.875192 -10.619507 7.028241  
 486 1 0 12.896707 -6.649752 7.028316  
 487 1 0 22.063296 -2.811361 0.002168  
 488 1 0 14.156490 3.206908 -7.025578  
 489 6 0 -12.718813 -0.175929 -0.095342  
 490 1 0 -11.994222 -0.434932 -0.828254  
 491 1 0 -13.326814 -0.997871 0.195843

OH--Zr<sub>6</sub>O<sub>8</sub> (TCPP-Cu)<sub>6</sub>

-----  
 Center Atomic Atomic Coordinates (Angstroms)

Number Number Type X Y Z

-----  
 1 8 0 2.568209 -2.964973 0.933692  
 2 6 0 4.053798 -5.267940 0.993140  
 3 1 0 4.204000 -4.605601 1.659266  
 4 6 0 4.770220 -6.429658 1.006002  
 5 1 0 5.413778 -6.582102 1.685708  
 6 6 0 6.316632 -8.838922 -0.958784  
 7 6 0 6.627694 -7.849405 -1.960548  
 8 1 0 6.226306 -6.993326 -2.054134  
 9 6 0 11.788383 -16.920847 0.328574  
 10 1 0 12.712331 -16.921128 0.555064  
 11 6 0 11.082665 -15.752533 0.324607  
 12 1 0 11.515618 -14.936575 0.539479  
 13 6 0 8.018434 -14.278784 1.028087  
 14 6 0 7.792853 -15.215615 2.100886  
 15 1 0 8.241083 -16.042824 2.233396  
 16 8 0 -3.848662 -0.758345 0.934620

17 6 0 -6.585863 -0.893456 0.994969  
18 1 0 -6.087123 -1.355105 1.660637  
19 6 0 -7.950146 -0.933045 1.008298  
20 1 0 -8.403702 -1.414571 1.687876  
21 6 0 -10.810542 -1.066457 -0.955542  
22 6 0 -10.109486 -1.829996 -1.958021  
23 1 0 -9.167437 -1.910367 -2.051992  
24 6 0 -20.545108 -1.764950 0.334890  
25 1 0 -21.007243 -2.565109 0.561063  
26 6 0 -19.180459 -1.737933 0.330449  
27 1 0 -18.690216 -2.520992 0.544671  
28 6 0 -16.371786 0.178468 1.034079  
29 6 0 -17.069931 0.841593 2.107530  
30 1 0 -18.010384 0.866940 2.240395  
31 8 0 1.270719 3.695443 0.936256  
32 6 0 2.522418 6.133499 0.997805  
33 1 0 1.873452 5.932019 1.663557  
34 6 0 3.170244 7.334808 1.011597  
35 1 0 2.980253 7.967951 1.691628  
36 6 0 4.484198 9.879876 -0.951175  
37 6 0 3.472064 9.655119 -1.953426  
38 1 0 2.931404 8.879524 -2.047673  
39 6 0 8.747031 18.658724 0.343034  
40 1 0 8.285223 19.458886 0.569856  
41 6 0 8.088104 17.463399 0.338107  
42 1 0 7.164911 17.430234 0.552641  
43 6 0 8.343672 14.072392 1.039594  
44 6 0 9.267414 14.344788 2.112881  
45 1 0 9.759636 15.146492 2.246051  
46 6 0 14.133623 -4.560197 -5.043282  
47 1 0 14.428988 -5.463118 -4.993595  
48 6 0 14.121841 -3.778951 -3.924119  
49 1 0 14.417134 -4.133437 -3.095535  
50 6 0 12.415745 -1.283463 -2.215871  
51 6 0 11.158213 -1.761936 -2.734635  
52 1 0 11.035920 -2.335251 -3.482364  
53 6 0 13.091873 3.478916 6.373509  
54 1 0 12.833114 3.120031 7.215661  
55 6 0 13.104018 2.685098 5.263230  
56 1 0 12.845411 1.775001 5.328450  
57 6 0 14.758391 1.972600 2.294775  
58 6 0 16.018836 2.350657 2.884513  
59 1 0 16.142726 2.868950 3.671132  
60 6 0 -9.573506 9.583992 6.376100

61 1 0 -9.133610 9.538828 7.218378  
62 6 0 -8.891730 9.992102 5.266308  
63 1 0 -7.974282 10.223150 5.331984  
64 6 0 -9.100854 11.782900 2.298879  
65 6 0 -10.058686 12.685086 2.888839  
66 1 0 -10.569758 12.532750 3.675189  
67 6 0 -3.128377 14.512732 -5.035452  
68 1 0 -2.494125 15.219955 -4.985113  
69 6 0 -3.799450 14.111219 -3.916766  
70 1 0 -3.640389 14.543686 -3.087861  
71 6 0 -5.108145 11.384906 -2.210640  
72 6 0 -4.064832 10.535405 -2.729567  
73 1 0 -3.506920 10.716612 -3.476990  
74 6 0 -3.527968 -13.097337 6.366863  
75 1 0 -3.709090 -12.694310 7.209324  
76 6 0 -4.221908 -12.710276 5.257068  
77 1 0 -4.880749 -12.031305 5.322934  
78 6 0 -5.667200 -13.784960 2.288481  
79 6 0 -5.969804 -15.065922 2.877553  
80 1 0 -5.582612 -15.432836 3.663811  
81 6 0 -11.015018 -9.973061 -5.045354  
82 1 0 -11.944636 -9.777424 -4.995213  
83 6 0 -10.332147 -10.354159 -3.926666  
84 1 0 -10.786491 -10.433146 -3.097966  
85 6 0 -7.317330 -10.125412 -2.219362  
86 6 0 -7.103120 -8.796808 -2.737400  
87 1 0 -7.538749 -8.403787 -3.484734  
88 6 0 11.567822 -9.317831 -5.045200  
89 1 0 12.484531 -9.068624 -4.995048  
90 6 0 10.908179 -9.737882 -3.926521  
91 1 0 11.366328 -9.790395 -3.097816  
92 6 0 7.885148 -9.684319 -2.219260  
93 6 0 7.594273 -8.370371 -2.737301  
94 1 0 8.006392 -7.952752 -3.484629  
95 6 0 4.274359 -12.870957 6.366915  
96 1 0 4.431798 -12.458105 7.209379  
97 6 0 4.944703 -12.444310 5.257130  
98 1 0 5.563068 -11.728283 5.323005  
99 6 0 6.449916 -13.433389 2.288563  
100 6 0 6.826273 -14.694650 2.877639  
101 1 0 6.460996 -15.083399 3.663892  
102 6 0 -13.852351 -5.372196 -5.043472  
103 1 0 -14.094869 -6.290725 -4.993787  
104 6 0 -13.885903 -4.591581 -3.924307

105 1 0 -14.160156 -4.962593 -3.095728  
106 6 0 -12.327389 -2.001373 -2.216038  
107 6 0 -11.044222 -2.406128 -2.734786  
108 1 0 -10.888883 -2.971390 -3.482511  
109 6 0 -13.278619 2.713790 6.373332  
110 1 0 -12.999496 2.370509 7.215486  
111 6 0 -13.244704 1.920602 5.263053  
112 1 0 -12.933762 1.027031 5.328276  
113 6 0 -14.854941 1.113385 2.294575  
114 6 0 -16.135195 1.417724 2.884296  
115 1 0 -16.288936 1.927961 3.670912  
116 6 0 2.274756 14.669500 -5.035416  
117 1 0 1.600564 15.338761 -4.985086  
118 6 0 2.967966 14.307572 -3.916720  
119 1 0 2.784085 14.730089 -3.087819  
120 6 0 4.432508 11.661723 -2.210576  
121 6 0 3.440211 10.753161 -2.729517  
122 1 0 2.872741 10.901717 -3.476949  
123 6 0 8.994657 10.122740 6.376227  
124 1 0 8.558109 10.052144 7.218496  
125 6 0 8.290382 10.490632 5.266423  
126 1 0 7.361079 10.668097 5.332088  
127 6 0 8.395362 12.290544 2.298997  
128 6 0 9.299266 13.246746 2.888970  
129 1 0 9.818299 13.124301 3.675326  
130 8 0 3.879169 -0.534127 0.934673  
131 6 0 6.619597 -0.510305 0.995058  
132 1 0 6.148454 -1.000096 1.660721  
133 6 0 7.983882 -0.470728 1.008405  
134 1 0 8.464584 -0.925146 1.687990  
135 6 0 10.847227 -0.438067 -0.955395  
136 6 0 10.191633 -1.240971 -1.957883  
137 1 0 9.255832 -1.375824 -2.051869  
138 6 0 16.326908 1.127205 1.034299  
139 6 0 16.985414 1.829693 2.107761  
140 1 0 17.922814 1.909523 2.240636  
141 6 0 -9.821132 18.119977 0.342909  
142 1 0 -9.406498 18.945570 0.569736  
143 6 0 -9.094007 16.964868 0.337991  
144 1 0 -8.170448 16.985287 0.552538  
145 6 0 -9.152545 13.564747 1.039477  
146 6 0 -10.090539 13.783127 2.112749  
147 1 0 -10.628420 14.554942 2.245913  
148 8 0 -1.489881 3.615422 0.936396

149 6 0 -2.880751 5.976748 0.997740  
150 1 0 -2.221237 5.813213 1.663528  
151 6 0 -3.597173 7.138454 1.011552  
152 1 0 -3.444220 7.781548 1.691585  
153 6 0 -5.056454 9.603059 -0.951239  
154 6 0 -4.032978 9.437364 -1.953475  
155 1 0 -3.448257 8.694421 -2.047717  
156 6 0 -10.794457 -17.576077 0.328422  
157 1 0 -11.716837 -17.629929 0.554900  
158 6 0 -10.157664 -16.368811 0.324464  
159 1 0 -10.637202 -15.579328 0.539329  
160 6 0 -7.184046 -14.719876 1.027985  
161 6 0 -6.904541 -15.642054 2.100787  
162 1 0 -7.304057 -16.493860 2.233292  
163 8 0 -2.398965 -3.109093 0.933658  
164 6 0 -3.748530 -5.494321 0.993087  
165 1 0 -3.936891 -4.841806 1.659211  
166 6 0 -4.396390 -6.695623 1.005941  
167 1 0 -5.030038 -6.885126 1.685639  
168 6 0 -5.800484 -9.190496 -0.958866  
169 6 0 -6.168382 -8.220677 -1.960635  
170 1 0 -5.817302 -7.342765 -2.054215  
171 6 0 -11.574287 9.300044 5.066219  
172 1 0 -12.490998 9.050838 5.016067  
173 6 0 -10.914645 9.720095 3.947540  
174 1 0 -11.372793 9.772609 3.118834  
175 6 0 -7.891613 9.666534 2.240278  
176 6 0 -7.600739 8.352584 2.758318  
177 1 0 -8.012857 7.934967 3.505646  
178 6 0 -4.280825 12.853169 -6.345897  
179 1 0 -4.438261 12.440319 -7.188361  
180 6 0 -4.951169 12.426524 -5.236112  
181 1 0 -5.569532 11.710497 -5.301986  
182 6 0 -6.456380 13.415603 -2.267545  
183 6 0 -6.832736 14.676865 -2.856621  
184 1 0 -6.467459 15.065613 -3.642874  
185 6 0 13.845887 5.354409 5.064489  
186 1 0 14.088404 6.272939 5.014805  
187 6 0 13.879437 4.573796 3.945326  
188 1 0 14.153693 4.944806 3.116747  
189 6 0 12.320923 1.983587 2.237057  
190 6 0 11.037757 2.388342 2.755805  
191 1 0 10.882418 2.953603 3.503529  
192 6 0 13.272153 -2.731577 -6.352313

193 1 0 12.993031 -2.388296 -7.194469  
194 6 0 13.238237 -1.938389 -5.242035  
195 1 0 12.927298 -1.044817 -5.307257  
196 6 0 14.848477 -1.131172 -2.273558  
197 6 0 16.128728 -1.435511 -2.863278  
198 1 0 16.282472 -1.945748 -3.649893  
199 6 0 -2.281221 -14.687286 5.056435  
200 1 0 -1.607029 -15.356547 5.006104  
201 6 0 -2.974430 -14.325358 3.937739  
202 1 0 -2.790549 -14.747875 3.108837  
203 6 0 -4.438972 -11.679509 2.231593  
204 6 0 -3.446675 -10.770946 2.750534  
205 1 0 -2.879207 -10.919501 3.497967  
206 6 0 -9.001123 -10.140524 -6.355209  
207 1 0 -8.564574 -10.069929 -7.197477  
208 6 0 -8.296846 -10.508418 -5.245406  
209 1 0 -7.367544 -10.685883 -5.311069  
210 6 0 -8.401828 -12.308329 -2.277979  
211 6 0 -9.305732 -13.264533 -2.867952  
212 1 0 -9.824765 -13.142086 -3.654308  
213 8 0 -3.885590 0.516225 -0.913571  
214 6 0 -6.626062 0.492521 -0.974040  
215 1 0 -6.154919 0.982311 -1.639703  
216 6 0 -7.990346 0.452940 -0.987387  
217 1 0 -8.471050 0.907361 -1.666972  
218 6 0 -10.853691 0.420281 0.976414  
219 6 0 -10.198099 1.223183 1.978902  
220 1 0 -9.262296 1.358038 2.072887  
221 6 0 -20.612362 0.553187 -0.314149  
222 1 0 -21.120111 1.325206 -0.540327  
223 6 0 -19.248444 0.605339 -0.309689  
224 1 0 -18.804426 1.415505 -0.523907  
225 6 0 -16.333374 -1.144990 -1.013280  
226 6 0 -16.991880 -1.847479 -2.086742  
227 1 0 -17.929279 -1.927310 -2.219618  
228 6 0 9.814667 -18.137763 -0.321891  
229 1 0 9.400034 -18.963356 -0.548718  
230 6 0 9.087543 -16.982653 -0.316973  
231 1 0 8.163984 -17.003073 -0.531520  
232 6 0 9.146081 -13.582533 -1.018459  
233 6 0 10.084075 -13.800913 -2.091731  
234 1 0 10.621956 -14.572728 -2.224895  
235 8 0 1.483421 -3.633200 -0.915366  
236 6 0 2.874285 -5.994533 -0.976723

237 1 0 2.214771 -5.830998 -1.642510  
238 6 0 3.590707 -7.156240 -0.990534  
239 1 0 3.437755 -7.799334 -1.670566  
240 6 0 5.049989 -9.620845 0.972258  
241 6 0 4.026514 -9.455150 1.974494  
242 1 0 3.441791 -8.712208 2.068735  
243 6 0 10.787993 17.558291 -0.307405  
244 1 0 11.710372 17.612143 -0.533882  
245 6 0 10.151198 16.351025 -0.303446  
246 1 0 10.630736 15.561541 -0.518311  
247 6 0 7.177581 14.702091 -1.006966  
248 6 0 6.898076 15.624267 -2.079770  
249 1 0 7.297593 16.476073 -2.212274  
250 8 0 2.392606 3.091453 -0.912731  
251 6 0 3.741990 5.476575 -0.972129  
252 1 0 3.930425 4.824019 -1.638193  
253 6 0 4.389925 6.677836 -0.984922  
254 1 0 5.023572 6.867339 -1.664621  
255 6 0 5.794019 9.172710 0.979883  
256 6 0 6.161918 8.202891 1.981653  
257 1 0 5.810838 7.324978 2.075233  
258 8 0 -2.574673 2.947184 -0.912670  
259 6 0 -4.060261 5.250155 -0.972122  
260 1 0 -4.210463 4.587816 -1.638248  
261 6 0 -4.776684 6.411872 -0.984984  
262 1 0 -5.420242 6.564316 -1.664690  
263 6 0 -6.323096 8.821136 0.979802  
264 6 0 -6.634159 7.831619 1.981567  
265 1 0 -6.232769 6.975538 2.075152  
266 6 0 -11.794849 16.903062 -0.307556  
267 1 0 -12.718796 16.903343 -0.534046  
268 6 0 -11.089129 15.734747 -0.303587  
269 1 0 -11.522082 14.918787 -0.518462  
270 6 0 -8.024899 14.260998 -1.007069  
271 6 0 -7.799317 15.197829 -2.079868  
272 1 0 -8.247548 16.025038 -2.212379  
273 8 0 3.842185 0.740524 -0.913578  
274 6 0 6.579397 0.875669 -0.973951  
275 1 0 6.080657 1.337320 -1.639619  
276 6 0 7.943681 0.915258 -0.987279  
277 1 0 8.397238 1.396784 -1.666858  
278 6 0 10.804078 1.048670 0.976560  
279 6 0 10.103020 1.812211 1.979039  
280 1 0 9.160973 1.892582 2.073010



281 6 0 16.371299 -0.402252 -0.845295  
282 6 0 17.063466 -0.859379 -2.086511  
283 1 0 18.003917 -0.884725 -2.219376  
284 8 0 -1.277235 -3.713297 -0.915383  
285 6 0 -2.528847 -6.151303 -0.976758  
286 1 0 -1.879916 -5.949804 -1.642538  
287 6 0 -3.176709 -7.352594 -0.990579  
288 1 0 -2.986717 -7.985738 -1.670610  
289 6 0 -4.490662 -9.897663 0.972194  
290 6 0 -3.478529 -9.672905 1.974444  
291 1 0 -2.937870 -8.897310 2.068691  
292 6 0 -8.753496 -18.676509 -0.322016  
293 1 0 -8.291687 -19.476673 -0.548838  
294 6 0 -8.094568 -17.481185 -0.317087  
295 1 0 -7.171375 -17.448021 -0.531623  
296 6 0 -8.350137 -14.090177 -1.018577  
297 6 0 -9.273878 -14.362575 -2.091862  
298 1 0 -9.766103 -15.164278 -2.225032  
299 6 0 -14.140087 4.542410 5.064301  
300 1 0 -14.435452 5.445332 5.014613  
301 6 0 -14.128307 3.761164 3.945137  
302 1 0 -14.423599 4.115650 3.116553  
303 6 0 -12.422210 1.265677 2.236889  
304 6 0 -11.164677 1.744149 2.755654  
305 1 0 -11.042383 2.317467 3.503381  
306 6 0 -13.098339 -3.496702 -6.352491  
307 1 0 -12.839578 -3.137817 -7.194643  
308 6 0 -13.110483 -2.702883 -5.242213  
309 1 0 -12.851877 -1.792787 -5.307431  
310 6 0 -14.764855 -1.990386 -2.273757  
311 6 0 -16.025300 -2.368444 -2.863494  
312 1 0 -16.149190 -2.886737 -3.650114  
313 6 0 9.567042 -9.601780 -6.355083  
314 1 0 9.127145 -9.556613 -7.197359  
315 6 0 8.885264 -10.009888 -5.245290  
316 1 0 7.967816 -10.240936 -5.310965  
317 6 0 9.094388 -11.800685 -2.277859  
318 6 0 10.052222 -12.702872 -2.867821  
319 1 0 10.563292 -12.550536 -3.654171  
320 6 0 3.121912 -14.530519 5.056471  
321 1 0 2.487659 -15.237740 5.006130  
322 6 0 3.792985 -14.129006 3.937783  
323 1 0 3.633924 -14.561474 3.108879  
324 6 0 5.101681 -11.402692 2.231658

325 6 0 4.058368 -10.553191 2.750585  
326 1 0 3.500456 -10.734398 3.498009  
327 6 0 3.521503 13.079551 -6.345845  
328 1 0 3.702625 12.676524 -7.188306  
329 6 0 4.215442 12.692489 -5.236050  
330 1 0 4.874281 12.013518 -5.301916  
331 6 0 5.660734 13.767175 -2.267462  
332 6 0 5.963339 15.048136 -2.856535  
333 1 0 5.576146 15.415051 -3.642793  
334 6 0 11.008555 9.955275 5.066373  
335 1 0 11.938172 9.759638 5.016232  
336 6 0 10.325683 10.336373 3.947684  
337 1 0 10.780025 10.415362 3.118984  
338 6 0 7.310866 10.107626 2.240380  
339 6 0 7.096654 8.779022 2.758418  
340 1 0 7.532284 8.386001 3.505752  
341 40 0 1.790452 -0.976799 1.421613  
342 8 0 1.776351 -0.968280 -0.860146  
343 40 0 -1.737799 -1.079170 1.421589  
344 8 0 -1.724180 -1.069846 -0.860172  
345 40 0 -0.062540 2.027847 1.423032  
346 8 0 -0.061313 2.011952 -0.858689  
347 40 0 -1.797148 0.959460 -1.400714  
348 8 0 -1.782779 0.950447 0.881107  
349 40 0 0.055871 -2.045356 -1.401824  
350 8 0 0.055413 -2.030286 0.879928  
351 40 0 1.731405 1.061504 -1.400546  
352 8 0 1.717706 1.052039 0.881147  
353 29 0 7.132784 -11.580271 0.005775  
354 29 0 -13.592349 -0.403174 0.010417  
355 29 0 6.449868 11.956767 0.015335  
356 29 0 13.585884 0.385388 0.010602  
357 29 0 -7.139250 11.562485 0.015243  
358 29 0 -6.456331 -11.974553 0.005684  
359 8 0 -0.003204 -0.009798 2.184346  
360 8 0 -0.003251 -0.008000 -2.163413  
361 7 0 7.090900 -9.948689 -1.140641  
362 7 0 7.185371 -13.205258 1.161086  
363 7 0 -12.158826 -1.182000 -1.136986  
364 7 0 -15.025507 0.363078 1.166706  
365 7 0 5.058211 11.105404 -1.132084  
366 7 0 7.830455 12.814094 1.171646  
367 7 0 12.199944 -0.475241 -1.136822  
368 7 0 14.972188 1.233447 1.166910

369 7 0 -8.567237 12.338321 1.171536  
370 7 0 -5.700555 10.793245 -1.132156  
371 7 0 -6.414630 -13.599855 1.160995  
372 7 0 -6.509103 -10.343286 -1.140733  
373 7 0 -7.097364 9.930903 1.161660  
374 7 0 -7.191835 13.187471 -1.140068  
375 7 0 12.152361 1.164213 1.158004  
376 7 0 15.019042 -0.380865 -1.145688  
377 7 0 -5.064677 -11.123191 1.153102  
378 7 0 -7.836921 -12.831879 -1.150628  
379 7 0 -12.206409 0.457456 1.157840  
380 7 0 -14.978654 -1.251231 -1.145891  
381 7 0 8.560773 -12.356108 -1.150517  
382 7 0 5.694091 -10.811031 1.153174  
383 7 0 6.408165 13.582068 -1.139976  
384 7 0 6.502639 10.325500 1.161752  
385 6 0 2.333695 -3.798330 0.008958  
386 6 0 3.114627 -5.064645 0.008441  
387 6 0 4.555860 -7.401671 0.007485  
388 6 0 5.331669 -8.659680 0.006970  
389 6 0 11.150940 -18.095898 0.003111  
390 6 0 9.709708 -15.758871 0.004066  
391 6 0 8.933898 -14.500862 0.004581  
392 6 0 -4.453444 -0.138014 0.010480  
393 6 0 -5.940572 -0.181162 0.010470  
394 6 0 -8.685113 -0.260794 0.010450  
395 6 0 -10.162486 -0.303660 0.010441  
396 6 0 -21.244124 -0.625187 0.010366  
397 6 0 -18.499585 -0.545557 0.010384  
398 6 0 -17.022211 -0.502691 0.010394  
399 6 0 2.109551 3.909605 0.012132  
400 6 0 2.816463 5.219012 0.012582  
401 6 0 4.119556 7.635785 0.013592  
402 6 0 4.821120 8.936661 0.014116  
403 6 0 10.083488 18.694405 0.018051  
404 6 0 8.780180 16.277747 0.017077  
405 6 0 8.078616 14.976872 0.016551  
406 6 0 13.714031 -4.029829 -6.241471  
407 6 0 13.668067 -2.446177 -3.998978  
408 6 0 13.643326 -1.593707 -2.791854  
409 6 0 13.457736 4.800605 6.262673  
410 6 0 13.503701 3.216955 4.020179  
411 6 0 13.528442 2.364484 2.813055  
412 6 0 -10.901016 9.240064 6.264598

413 6 0 -9.551744 10.073071 4.023079  
414 6 0 -8.825438 10.521474 2.816479  
415 6 0 -3.377481 13.884907 -6.234113  
416 6 0 -4.726753 13.051899 -3.992592  
417 6 0 -5.453058 12.603496 -2.785993  
418 6 0 -2.566324 -14.074962 6.255091  
419 6 0 -3.961593 -13.321587 4.013552  
420 6 0 -4.712660 -12.916047 2.806943  
421 6 0 -10.346342 -9.874144 -6.243722  
422 6 0 -8.951073 -10.627519 -4.002184  
423 6 0 -8.200005 -11.033057 -2.795576  
424 6 0 10.894549 -9.257849 -6.243580  
425 6 0 9.545279 -10.090856 -4.002059  
426 6 0 8.818974 -10.539260 -2.795461  
427 6 0 3.371017 -13.902692 6.255131  
428 6 0 4.720288 -13.069687 4.013611  
429 6 0 5.446594 -12.621282 2.807011  
430 6 0 -13.464201 -4.818393 -6.241655  
431 6 0 -13.510165 -3.234741 -3.999161  
432 6 0 -13.534906 -2.382270 -2.792036  
433 6 0 -13.720496 4.012042 6.262489  
434 6 0 -13.674532 2.428392 4.019995  
435 6 0 -13.649790 1.575920 2.812872  
436 6 0 2.559860 14.057176 -6.234072  
437 6 0 3.955128 13.303801 -3.992534  
438 6 0 4.706195 12.898263 -2.785925  
439 6 0 10.339877 9.856359 6.264741  
440 6 0 8.944608 10.609733 4.023202  
441 6 0 8.193541 11.015271 2.816594  
442 6 0 4.446980 0.120228 0.010539  
443 6 0 5.934107 0.163375 0.010549  
444 6 0 8.678648 0.243008 0.010567  
445 6 0 10.156021 0.285873 0.010577  
446 6 0 17.015747 0.484904 0.010624  
447 6 0 -11.157405 18.078111 0.017907  
448 6 0 -9.716171 15.741085 0.016953  
449 6 0 -8.940363 14.483076 0.016437  
450 6 0 -2.340162 3.780543 0.012060  
451 6 0 -3.121092 5.046860 0.012577  
452 6 0 -4.562324 7.383885 0.013534  
453 6 0 -5.338134 8.641894 0.014048  
454 6 0 -10.089952 -18.712193 0.002967  
455 6 0 -8.786644 -16.295534 0.003941  
456 6 0 -8.085081 -14.994658 0.004466

457 6 0 -2.116517 -3.927450 0.008929  
 458 6 0 -2.822714 -5.236915 0.008401  
 459 6 0 -4.126020 -7.653571 0.007426  
 460 6 0 -4.827585 -8.954446 0.006902  
 461 1 0 -10.597852 -19.653965 0.002587  
 462 1 0 -2.092291 -14.324188 7.040954  
 463 1 0 -10.890080 -9.580553 -7.117252  
 464 1 0 11.361884 -8.969329 -7.019953  
 465 1 0 11.650125 -18.905350 0.002779  
 466 1 0 2.912221 -14.178984 7.040987  
 467 1 0 13.729952 -4.578343 -7.018182  
 468 6 0 18.555100 0.529568 0.010634  
 469 6 0 19.283325 -0.518749 0.573830  
 470 6 0 19.221323 1.617960 -0.552477  
 471 6 0 20.677451 -0.478277 0.574473  
 472 1 0 18.828684 -1.260617 0.958408  
 473 6 0 20.615882 1.658133 -0.552795  
 474 1 0 18.724913 2.332765 -0.936670  
 475 6 0 21.343995 0.610328 0.010672  
 476 1 0 21.174050 -1.192792 0.958961  
 477 1 0 21.070029 2.400382 -0.937226  
 478 1 0 22.294900 0.637716 0.011166  
 479 1 0 13.441816 5.349120 7.039383  
 480 1 0 10.823143 9.595419 7.041121  
 481 1 0 10.534901 19.531440 0.018389  
 482 1 0 2.076593 14.318114 -7.010452  
 483 1 0 -2.910147 14.173425 -7.010486  
 484 1 0 -11.656592 18.887565 0.018239  
 485 1 0 -11.368350 8.951544 7.040971  
 486 1 0 -13.736416 4.560557 7.039200  
 487 1 0 -22.194725 -0.652768 0.010359  
 488 1 0 -13.448281 -5.366906 -7.018366  
 489 8 0 0.661518 2.631839 -3.163894  
 490 1 0 0.216328 2.576505 -2.149569

Zr<sub>6</sub>O<sub>8</sub>(TCPP-Cu)<sub>6</sub>--OH

-----  
 Center Atomic Atomic Coordinates (Angstroms)

Number Number Type X Y Z

-----  
 1 8 0 -3.932481 0.523188 0.927022  
 2 6 0 -6.568976 1.271537 0.982166  
 3 1 0 -6.245460 0.674994 1.648837  
 4 6 0 -7.874150 1.670811 0.992895

5 1 0 -8.459195 1.360323 1.671664  
6 6 0 -10.623227 2.458751 -0.976382  
7 6 0 -10.201741 1.510233 -1.977432  
8 1 0 -9.334840 1.132433 -2.069597  
9 6 0 -20.071331 4.914436 0.295559  
10 1 0 -20.765710 4.304506 0.520943  
11 6 0 -18.769852 4.503141 0.293719  
12 1 0 -18.556486 3.604502 0.508967  
13 6 0 -15.496724 5.419999 1.002482  
14 6 0 -15.947726 6.272504 2.074523  
15 1 0 -16.830799 6.597694 2.205589  
16 8 0 2.343382 3.103662 0.938053  
17 6 0 4.309528 5.012695 1.001531  
18 1 0 3.629064 5.030034 1.666095  
19 6 0 5.307855 5.943359 1.016449  
20 1 0 5.329359 6.604493 1.696042  
21 6 0 7.370922 7.932402 -0.944110  
22 6 0 6.341879 8.042784 -1.948264  
23 1 0 5.581538 7.481032 -2.043452  
24 6 0 14.217618 14.885402 0.357208  
25 1 0 14.035884 15.791460 0.583056  
26 6 0 13.210699 13.963938 0.351163  
27 1 0 12.325102 14.228232 0.563940  
28 6 0 12.365954 10.670095 1.053532  
29 6 0 13.326383 10.633197 2.128544  
30 1 0 14.049126 11.235216 2.262561  
31 8 0 1.440199 -3.621639 0.938591  
32 6 0 2.110202 -6.278959 1.001141  
33 1 0 2.463365 -5.699088 1.667476  
34 6 0 2.416974 -7.608883 1.015505  
35 1 0 2.976650 -7.958848 1.696455  
36 6 0 3.114150 -10.387837 -0.946048  
37 6 0 3.727405 -9.550708 -1.947331  
38 1 0 3.621379 -8.611250 -2.041783  
39 6 0 5.708220 -19.795227 0.352686  
40 1 0 6.583044 -20.091128 0.580937  
41 6 0 5.413683 -18.462474 0.347236  
42 1 0 6.084696 -17.827913 0.562839  
43 6 0 2.981306 -16.084782 1.044697  
44 6 0 2.465775 -16.899313 2.117174  
45 1 0 2.625351 -17.826388 2.250635  
46 6 0 -13.661127 -5.916565 -5.065540  
47 1 0 -14.479272 -5.433576 -5.017196  
48 6 0 -13.138185 -6.495417 -3.945507

49 1 0 -13.595369 -6.424194 -3.117666  
50 6 0 -10.211839 -7.242662 -2.232482  
51 6 0 -9.582638 -6.052938 -2.750265  
52 1 0 -9.868189 -5.541675 -3.498475  
53 6 0 -7.588577 -11.265130 6.361301  
54 1 0 -7.632629 -10.824722 7.203368  
55 6 0 -8.120110 -10.677077 5.250139  
56 1 0 -8.527019 -9.822871 5.314669  
57 6 0 -9.828133 -11.234634 2.278926  
58 6 0 -10.525950 -12.350875 2.867568  
59 1 0 -10.277995 -12.821868 3.654605  
60 6 0 13.463327 -0.882097 6.397723  
61 1 0 13.101801 -1.138647 7.239423  
62 6 0 13.222660 -1.638824 5.287563  
63 1 0 12.686185 -2.418182 5.352395  
64 6 0 14.566655 -2.846166 2.321739  
65 6 0 15.881201 -2.890406 2.914460  
66 1 0 16.163113 -2.438611 3.701231  
67 6 0 11.896755 -8.839836 -5.016125  
68 1 0 11.887417 -9.789759 -4.965768  
69 6 0 12.133727 -8.095130 -3.897076  
70 1 0 12.298523 -8.524899 -3.067889  
71 6 0 11.313968 -5.183485 -2.191478  
72 6 0 9.969741 -5.234505 -2.713546  
73 1 0 9.671649 -5.739120 -3.461401  
74 6 0 -6.054567 12.157896 6.356372  
75 1 0 -5.653775 11.974883 7.199491  
76 6 0 -5.276056 12.325458 5.247833  
77 1 0 -4.333043 12.250673 5.315232  
78 6 0 -4.895602 14.086813 2.279801  
79 6 0 -5.515231 15.248587 2.867829  
80 1 0 -6.049564 15.268453 3.653220  
81 6 0 1.649450 14.755615 -5.043440  
82 1 0 2.476646 15.222598 -4.991973  
83 6 0 0.883175 14.590883 -3.925988  
84 1 0 1.170850 14.950261 -3.096833  
85 6 0 -1.232481 12.428265 -2.222047  
86 6 0 -0.515127 11.289090 -2.738883  
87 1 0 0.072756 11.281607 -3.485262  
88 6 0 -14.876169 -0.649490 -5.069606  
89 1 0 -15.400074 -1.441998 -5.020277  
90 6 0 -14.660023 0.101586 -3.950598  
91 1 0 -15.040088 -0.161499 -3.122500  
92 6 0 -12.357316 2.057747 -2.239660

93 6 0 -11.270353 1.263119 -2.755912  
94 1 0 -11.302831 0.677337 -3.503274  
95 6 0 -11.764136 6.835463 6.347331  
96 1 0 -11.611096 6.421498 7.190058  
97 6 0 -11.983977 6.072364 5.237213  
98 1 0 -11.975593 5.126324 5.303132  
99 6 0 -13.762637 5.821005 2.265762  
100 6 0 -14.879114 6.519618 2.853004  
101 1 0 -14.862808 7.052789 3.639266  
102 6 0 6.818384 13.174339 -5.033116  
103 1 0 6.393850 14.024251 -4.984147  
104 6 0 7.357257 12.610338 -3.913056  
105 1 0 7.316855 13.070082 -3.084557  
106 6 0 7.894635 9.636106 -2.203815  
107 6 0 6.664610 9.092671 -2.724541  
108 1 0 6.175891 9.414541 -3.473073  
109 6 0 11.708761 6.723757 6.391854  
110 1 0 11.271098 6.797244 7.233298  
111 6 0 11.161298 7.296958 5.280667  
112 1 0 10.337607 7.762644 5.344537  
113 6 0 11.842243 8.966388 2.313235  
114 6 0 13.003652 9.583310 2.904822  
115 1 0 13.454772 9.301707 3.692181  
116 6 0 7.942862 -12.525635 -5.022385  
117 1 0 8.891017 -12.582989 -4.970513  
118 6 0 7.181482 -12.711589 -3.904917  
119 1 0 7.597236 -12.907416 -3.075333  
120 6 0 4.331691 -11.691804 -2.203431  
121 6 0 4.477698 -10.354260 -2.722179  
122 1 0 5.003149 -10.091100 -3.468767  
123 6 0 -0.124440 -13.548550 6.376211  
124 1 0 0.155394 -13.207226 7.218925  
125 6 0 0.649176 -13.359768 5.267657  
126 1 0 1.464110 -12.879347 5.334627  
127 6 0 1.763766 -14.780816 2.302082  
128 6 0 1.715481 -16.095761 2.892021  
129 1 0 1.243583 -16.346537 3.677620  
130 8 0 -3.311673 -2.167951 0.929099  
131 6 0 -5.353932 -3.995538 0.986231  
132 1 0 -5.324657 -3.316584 1.651918  
133 6 0 -6.352310 -4.926194 0.997987  
134 1 0 -7.014478 -4.902373 1.676496  
135 6 0 -8.477751 -6.841656 -0.969203  
136 6 0 -8.514026 -5.805822 -1.971784



137 1 0 -7.900199 -5.086580 -2.064798  
138 6 0 -11.562222 -11.635640 1.015646  
139 6 0 -11.594559 -12.597988 2.089088  
140 1 0 -12.245986 -13.276964 2.220929  
141 6 0 19.295987 -7.128774 0.374199  
142 1 0 19.529452 -8.022549 0.601435  
143 6 0 17.987168 -6.741529 0.367143  
144 1 0 17.306770 -7.366749 0.580607  
145 6 0 15.783842 -4.149758 1.064676  
146 6 0 16.631490 -3.694019 2.139573  
147 1 0 17.544888 -3.918446 2.274235  
148 8 0 3.460386 -1.738431 0.941790  
149 6 0 6.064095 -2.593160 1.007401  
150 1 0 5.459767 -2.905856 1.672219  
151 6 0 7.369219 -2.992424 1.023344  
152 1 0 7.677937 -3.576332 1.703899  
153 6 0 10.096946 -3.879452 -0.934787  
154 6 0 9.219373 -4.430926 -1.938666  
155 1 0 8.289877 -4.259282 -2.034405  
156 6 0 -3.545711 20.319541 0.321725  
157 1 0 -2.888990 20.969101 0.549248  
158 6 0 -3.226654 18.992436 0.318329  
159 1 0 -2.345548 18.716262 0.534633  
160 6 0 -4.371890 15.790517 1.020096  
161 6 0 -5.192501 16.298475 2.091551  
162 1 0 -5.455212 17.201963 2.223601  
163 8 0 -0.297615 3.911593 0.932777  
164 6 0 -0.859406 6.593969 0.991205  
165 1 0 -0.288139 6.228381 1.658270  
166 6 0 -1.166229 7.923904 1.003517  
167 1 0 -0.816645 8.484673 1.683764  
168 6 0 -1.756192 10.724559 -0.962343  
169 6 0 -0.837858 10.239201 -1.962606  
170 1 0 -0.521597 9.348096 -2.055643  
171 6 0 14.780405 0.652346 5.089928  
172 1 0 15.304311 1.444853 5.040599  
173 6 0 14.564259 -0.098731 3.970921  
174 1 0 14.944325 0.164355 3.142823  
175 6 0 12.260378 -2.054599 2.259308  
176 6 0 11.174472 -1.260694 2.776653  
177 1 0 11.207064 -0.674490 3.523603  
178 6 0 11.668372 -6.832607 -6.327008  
179 1 0 11.515332 -6.418642 -7.169735  
180 6 0 11.888214 -6.069509 -5.216888

181 1 0 11.879830 -5.123467 -5.282809  
182 6 0 13.666264 -5.817977 -2.244352  
183 6 0 14.783365 -6.516739 -2.832684  
184 1 0 14.767048 -7.049917 -3.618954  
185 6 0 -6.914148 -13.171483 5.053438  
186 1 0 -6.489614 -14.021394 5.004471  
187 6 0 -7.453021 -12.607482 3.933379  
188 1 0 -7.412619 -13.067226 3.104879  
189 6 0 -7.990398 -9.633252 2.224138  
190 6 0 -6.760374 -9.089815 2.744864  
191 1 0 -6.271655 -9.411686 3.493394  
192 6 0 -11.804525 -6.720902 -6.371532  
193 1 0 -11.366862 -6.794387 -7.212977  
194 6 0 -11.257061 -7.294102 -5.260344  
195 1 0 -10.433370 -7.759787 -5.324215  
196 6 0 -11.938006 -8.963532 -2.292913  
197 6 0 -13.099416 -9.580453 -2.884500  
198 1 0 -13.550536 -9.298849 -3.671859  
199 6 0 -8.038626 12.528493 5.042709  
200 1 0 -8.986780 12.585847 4.990835  
201 6 0 -7.277246 12.714445 3.925240  
202 1 0 -7.693000 12.910272 3.095656  
203 6 0 -4.427455 11.694660 2.223754  
204 6 0 -4.573462 10.357116 2.742501  
205 1 0 -5.098912 10.093955 3.489091  
206 6 0 0.028677 13.551406 -6.355888  
207 1 0 -0.251158 13.210083 -7.198602  
208 6 0 -0.744939 13.362624 -5.247334  
209 1 0 -1.559874 12.882202 -5.314304  
210 6 0 -1.859529 14.783672 -2.281758  
211 6 0 -1.811245 16.098616 -2.871697  
212 1 0 -1.339346 16.349394 -3.657297  
213 8 0 3.215908 2.170807 -0.908776  
214 6 0 5.258168 3.998394 -0.965908  
215 1 0 5.228893 3.319439 -1.631597  
216 6 0 6.256546 4.929049 -0.977664  
217 1 0 6.918714 4.905228 -1.656175  
218 6 0 8.381987 6.844512 0.989526  
219 6 0 8.418263 5.808678 1.992108  
220 1 0 7.804435 5.089436 2.085120  
221 6 0 15.800006 13.189013 -0.289208  
222 1 0 16.691478 12.944570 -0.513930  
223 6 0 14.810220 12.249158 -0.286324  
224 1 0 15.012147 11.347549 -0.500182

225 6 0 11.466459 11.638496 -0.995323  
226 6 0 11.498796 12.600845 -2.068765  
227 1 0 12.150222 13.279819 -2.200606  
228 6 0 -19.391751 7.131629 -0.353876  
229 1 0 -19.625216 8.025404 -0.581111  
230 6 0 -18.082932 6.744385 -0.346822  
231 1 0 -17.402533 7.369604 -0.560285  
232 6 0 -15.880411 4.152423 -1.044646  
233 6 0 -16.727258 3.696953 -2.119279  
234 1 0 -17.640640 3.921333 -2.253934  
235 8 0 -3.556150 1.741287 -0.921467  
236 6 0 -6.159859 2.596015 -0.987078  
237 1 0 -5.555531 2.908713 -1.651896  
238 6 0 -7.464982 2.995281 -1.003023  
239 1 0 -7.773701 3.579188 -1.683577  
240 6 0 -10.191552 3.882445 0.955317  
241 6 0 -9.315192 4.433927 1.958960  
242 1 0 -8.385636 4.262156 2.054713  
243 6 0 3.449947 -20.316685 -0.301403  
244 1 0 2.793227 -20.966245 -0.528924  
245 6 0 3.130890 -18.989580 -0.298006  
246 1 0 2.249784 -18.713406 -0.514312  
247 6 0 4.276127 -15.787662 -0.999774  
248 6 0 5.096737 -16.295619 -2.071229  
249 1 0 5.359449 -17.199106 -2.203278  
250 8 0 0.201851 -3.908737 -0.912455  
251 6 0 0.763642 -6.591114 -0.970883  
252 1 0 0.192376 -6.225524 -1.637948  
253 6 0 1.070465 -7.921047 -0.983194  
254 1 0 0.720881 -8.481817 -1.663442  
255 6 0 1.660429 -10.721703 0.982665  
256 6 0 0.742094 -10.236346 1.982928  
257 1 0 0.425833 -9.345240 2.075965  
258 8 0 3.836717 -0.520331 -0.906700  
259 6 0 6.473212 -1.268681 -0.961843  
260 1 0 6.149696 -0.672138 -1.628515  
261 6 0 7.778386 -1.667955 -0.972573  
262 1 0 8.363431 -1.357468 -1.651341  
263 6 0 10.530379 -2.456702 1.000567  
264 6 0 10.103007 -1.508464 1.997531  
265 1 0 9.239694 -1.127822 2.088517  
266 6 0 19.975567 -4.911580 -0.275238  
267 1 0 20.669947 -4.301650 -0.500619  
268 6 0 18.674088 -4.500284 -0.273395

269 1 0 18.460722 -3.601646 -0.488645  
270 6 0 15.400147 -5.416182 -0.982113  
271 6 0 15.852069 -6.269571 -2.054218  
272 1 0 16.735035 -6.594839 -2.185266  
273 8 0 -2.439146 -3.100807 -0.917730  
274 6 0 -4.405292 -5.009839 -0.981208  
275 1 0 -3.724828 -5.027178 -1.645773  
276 6 0 -5.403618 -5.940502 -0.996125  
277 1 0 -5.425122 -6.601638 -1.675719  
278 6 0 -7.466686 -7.929546 0.964432  
279 6 0 -6.437643 -8.039927 1.968587  
280 1 0 -5.677301 -7.478175 2.063774  
281 6 0 -12.602513 -10.516487 -0.865677  
282 6 0 -13.422147 -10.630341 -2.108222  
283 1 0 -14.144889 -11.232359 -2.242239  
284 8 0 -1.535962 3.624495 -0.918269  
285 6 0 -2.205966 6.281816 -0.980818  
286 1 0 -2.559129 5.701944 -1.647152  
287 6 0 -2.512738 7.611739 -0.995180  
288 1 0 -3.072415 7.961705 -1.676132  
289 6 0 -3.209914 10.390695 0.966370  
290 6 0 -3.823169 9.553565 1.967654  
291 1 0 -3.717143 8.614105 2.062104  
292 6 0 -5.803984 19.798083 -0.332362  
293 1 0 -6.678808 20.093985 -0.560615  
294 6 0 -5.509447 18.465329 -0.326912  
295 1 0 -6.180460 17.830770 -0.542516  
296 6 0 -3.077070 16.087638 -1.024375  
297 6 0 -2.561540 16.902169 -2.096851  
298 1 0 -2.721116 17.829245 -2.230312  
299 6 0 13.565363 5.919421 5.085863  
300 1 0 14.383508 5.436432 5.037519  
301 6 0 13.042421 6.498273 3.965830  
302 1 0 13.499605 6.427050 3.137990  
303 6 0 10.116076 7.245518 2.252805  
304 6 0 9.486873 6.055793 2.770588  
305 1 0 9.772426 5.544531 3.518797  
306 6 0 7.492812 11.267986 -6.340979  
307 1 0 7.536865 10.827578 -7.183046  
308 6 0 8.024346 10.679934 -5.229817  
309 1 0 8.431255 9.825726 -5.294346  
310 6 0 9.732369 11.237491 -2.258603  
311 6 0 10.430186 12.353730 -2.847244  
312 1 0 10.182231 12.824725 -3.634283

313 6 0 -13.559091 0.884953 -6.377402  
314 1 0 -13.197563 1.141503 -7.219100  
315 6 0 -13.318424 1.641681 -5.267241  
316 1 0 -12.781948 2.421039 -5.332072  
317 6 0 -14.662871 2.848458 -2.302029  
318 6 0 -15.976963 2.893402 -2.894127  
319 1 0 -16.258872 2.441483 -3.680919  
320 6 0 -11.992519 8.842692 5.036447  
321 1 0 -11.983180 9.792615 4.986091  
322 6 0 -12.229491 8.097985 3.917398  
323 1 0 -12.394287 8.527754 3.088213  
324 6 0 -11.409092 5.186409 2.212699  
325 6 0 -10.065485 5.237477 2.733806  
326 1 0 -9.767404 5.742008 3.481699  
327 6 0 5.958803 -12.155040 -6.336048  
328 1 0 5.558011 -11.972028 -7.179167  
329 6 0 5.180293 -12.322602 -5.227510  
330 1 0 4.237279 -12.247817 -5.294909  
331 6 0 4.799838 -14.083956 -2.259478  
332 6 0 5.419468 -15.245731 -2.847507  
333 1 0 5.953800 -15.265597 -3.632898  
334 6 0 -1.745213 -14.752758 5.063764  
335 1 0 -2.572410 -15.219742 5.012295  
336 6 0 -0.978938 -14.588027 3.946312  
337 1 0 -1.266614 -14.947406 3.117156  
338 6 0 1.136717 -12.425408 2.242369  
339 6 0 0.419363 -11.286233 2.759206  
340 1 0 -0.168520 -11.278749 3.505586  
341 40 0 -2.036295 -0.456185 1.418055  
342 8 0 -2.016377 -0.453352 -0.863659  
343 40 0 0.545601 1.950645 1.422142  
344 8 0 0.545244 1.934579 -0.859604  
345 40 0 1.339023 -1.488760 1.424797  
346 8 0 1.332437 -1.477817 -0.856969  
347 40 0 1.940531 0.459042 -1.397732  
348 8 0 1.920613 0.456207 0.883981  
349 40 0 -1.434788 1.491615 -1.404474  
350 8 0 -1.428199 1.480673 0.877292  
351 40 0 -0.641365 -1.947790 -1.401820  
352 8 0 -0.641007 -1.931722 0.879926  
353 29 0 -13.047979 3.978404 -0.015807  
354 29 0 9.896330 9.271376 0.025905  
355 29 0 3.008003 -13.245495 0.020385  
356 29 0 -9.992094 -9.268520 -0.005582

357 29 0 13.123260 -3.424916 -0.363960  
358 29 0 -3.103766 13.248352 -0.000062  
359 8 0 -0.052002 0.002156 2.184054  
360 8 0 -0.043762 0.000701 -2.163732  
361 7 0 -11.937216 2.780808 -1.160383  
362 7 0 -14.162439 5.163981 1.137657  
363 7 0 8.307393 8.909530 -1.124066  
364 7 0 11.476677 9.642422 1.184750  
365 7 0 3.492699 -11.687204 -1.126298  
366 7 0 2.535543 -14.800960 1.175983  
367 7 0 -9.517812 -7.707042 -1.152289  
368 7 0 -10.474967 -10.820798 1.149994  
369 7 0 14.524517 -3.612781 1.182593  
370 7 0 11.375547 -4.348562 -1.103327  
371 7 0 -4.210260 14.441354 1.153414  
372 7 0 -1.985038 12.058179 -1.144625  
373 7 0 11.855108 -2.764877 1.154389  
374 7 0 14.066168 -5.124510 -1.128122  
375 7 0 -8.403156 -8.906674 1.144389  
376 7 0 -11.572441 -9.639567 -1.164427  
377 7 0 -3.588462 11.690061 1.146622  
378 7 0 -2.631306 14.803815 -1.155661  
379 7 0 9.422048 7.709899 1.172611  
380 7 0 10.379203 10.823652 -1.129671  
381 7 0 -14.630773 3.617968 -1.174660  
382 7 0 -11.461489 4.350860 1.134157  
383 7 0 4.114496 -14.438498 -1.133091  
384 7 0 1.889274 -12.055324 1.164948  
385 6 0 -4.305200 1.303822 0.001657  
386 6 0 -5.727869 1.739044 -0.001185  
387 6 0 -8.353447 2.542258 -0.006429  
388 6 0 -9.766783 2.974624 -0.009252  
389 6 0 -20.368089 6.217765 -0.030429  
390 6 0 -17.742510 5.414551 -0.025185  
391 6 0 -16.329174 4.982184 -0.022361  
392 6 0 3.208685 3.037184 0.015317  
393 6 0 4.296931 4.051642 0.017041  
394 6 0 6.305325 5.923858 0.020220  
395 6 0 7.386433 6.931662 0.021932  
396 6 0 15.495729 14.491109 0.034772  
397 6 0 13.487336 12.618895 0.031591  
398 6 0 12.406228 11.611090 0.029880  
399 6 0 0.952870 -4.336722 0.013509  
400 6 0 1.287291 -5.786402 0.014628

401 6 0 1.904477 -8.461830 0.016693  
402 6 0 2.236704 -9.902001 0.017805  
403 6 0 4.728714 -20.704591 0.026142  
404 6 0 4.111529 -18.029161 0.024076  
405 6 0 3.779302 -16.588991 0.022966  
406 6 0 -12.993855 -6.037793 -6.262643  
407 6 0 -11.917184 -7.196589 -4.018361  
408 6 0 -11.337616 -7.820366 -2.810273  
409 6 0 -6.990332 -12.499247 6.251477  
410 6 0 -8.067005 -11.340450 4.007194  
411 6 0 -8.646571 -10.716674 2.799106  
412 6 0 14.233264 0.252819 6.287432  
413 6 0 13.773787 -1.263786 4.045194  
414 6 0 13.526269 -2.080603 2.839131  
415 6 0 11.671164 -8.203917 -6.215174  
416 6 0 12.130669 -6.687219 -3.973002  
417 6 0 12.377862 -5.871322 -2.766538  
418 6 0 -7.422117 12.256987 6.242375  
419 6 0 -5.873210 12.612569 4.003336  
420 6 0 -5.039440 12.803978 2.798073  
421 6 0 1.214582 14.239719 -6.242500  
422 6 0 -0.334324 13.884136 -4.003461  
423 6 0 -1.168093 13.692726 -2.798198  
424 6 0 -14.329029 -0.249962 -6.267110  
425 6 0 -13.869541 1.266668 -4.024892  
426 6 0 -13.622203 2.083064 -2.817915  
427 6 0 -11.766928 8.206772 6.235497  
428 6 0 -12.226416 6.690140 3.993278  
429 6 0 -12.473756 5.873745 2.786302  
430 6 0 6.894569 12.502103 -6.231153  
431 6 0 7.971241 11.343306 -3.986870  
432 6 0 8.550807 10.719529 -2.778783  
433 6 0 12.898091 6.040649 6.282966  
434 6 0 11.821420 7.199447 4.038682  
435 6 0 11.241852 7.823222 2.830596  
436 6 0 7.326352 -12.254130 -6.222053  
437 6 0 5.777446 -12.609714 -3.983014  
438 6 0 4.943677 -12.801123 -2.777751  
439 6 0 -1.310346 -14.236863 6.262823  
440 6 0 0.238560 -13.881279 4.023784  
441 6 0 1.072329 -13.689870 2.818520  
442 6 0 -3.304449 -3.034327 0.005005  
443 6 0 -4.392695 -4.048786 0.003282  
444 6 0 -6.401089 -5.921002 0.000102

445 6 0 -7.482197 -6.928805 -0.001610  
446 6 0 -12.501992 -11.608235 -0.009557  
447 6 0 20.272325 -6.214910 0.050752  
448 6 0 17.646764 -5.411638 0.045469  
449 6 0 16.233965 -4.979566 0.042681  
450 6 0 4.209436 -1.300967 0.018665  
451 6 0 5.632105 -1.736188 0.021506  
452 6 0 8.257591 -2.539702 0.026995  
453 6 0 9.670428 -2.971131 0.029298  
454 6 0 -4.824479 20.707447 -0.005819  
455 6 0 -4.207293 18.032017 -0.003754  
456 6 0 -3.875065 16.591846 -0.002643  
457 6 0 -1.048634 4.339578 0.006813  
458 6 0 -1.383055 5.789258 0.005694  
459 6 0 -2.000241 8.464688 0.003630  
460 6 0 -2.332468 9.904859 0.002517  
461 1 0 -5.064996 21.750063 -0.006624  
462 1 0 -7.943942 12.131127 7.027395  
463 1 0 1.818193 14.378290 -7.115055  
464 1 0 -14.488178 -0.775264 -7.043726  
465 1 0 -21.277487 6.495966 -0.032246  
466 1 0 -11.606133 8.717252 7.021598  
467 1 0 -13.366773 -5.636430 -7.039974  
468 6 0 -13.628455 -12.658318 -0.011341  
469 6 0 -14.868500 -12.351979 0.549832  
470 6 0 -13.409091 -13.915610 -0.574054  
471 6 0 -15.888677 -13.303009 0.548851  
472 1 0 -15.017623 -11.494634 0.934140  
473 6 0 -14.429790 -14.866703 -0.575997  
474 1 0 -12.563657 -14.124581 -0.956869  
475 6 0 -15.669411 -14.560672 -0.014553  
476 1 0 -16.734060 -13.094381 0.931961  
477 1 0 -14.280043 -15.724006 -0.960159  
478 1 0 -16.365396 -15.209190 -0.015167  
479 1 0 -6.617415 -12.900609 7.028807  
480 1 0 -1.846826 -14.360022 7.038336  
481 1 0 4.942483 -21.631254 0.026857  
482 1 0 7.862831 -12.130970 -6.997566  
483 1 0 11.512017 -8.729217 -6.991789  
484 1 0 21.181723 -6.493111 0.052568  
485 1 0 14.392414 0.778120 7.064049  
486 1 0 13.271009 5.639288 7.060296  
487 1 0 16.191358 15.139570 0.035872  
488 1 0 6.521651 12.903465 -7.008486



489 8 0 13.242391 -2.129439 -1.557670  
490 1 0 12.682220 -2.043704 -2.265641
